# Supplementary material for: Coupling of metabolomics and exome sequencing reveals graded effects of rare damaging heterozygous variants on gene function and resulting traits and diseases
Source: bioRxiv or medRxiv preprint supplement (doi:10.1101/2023.10.17.23297094), 2023-10-19

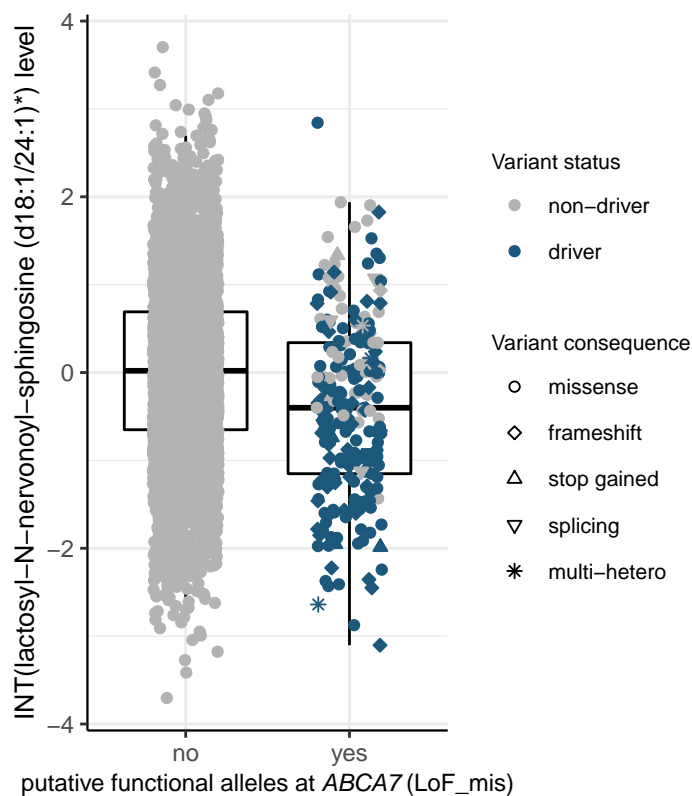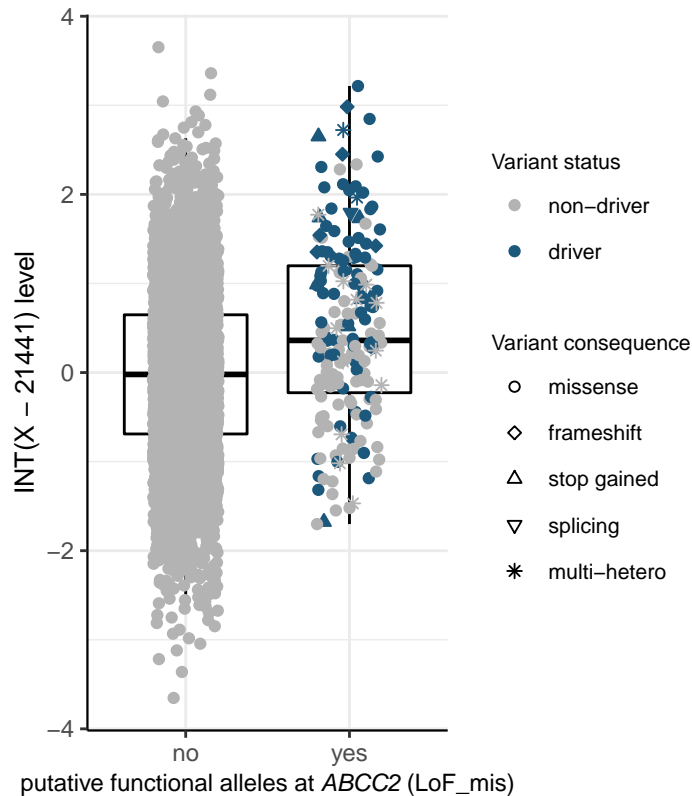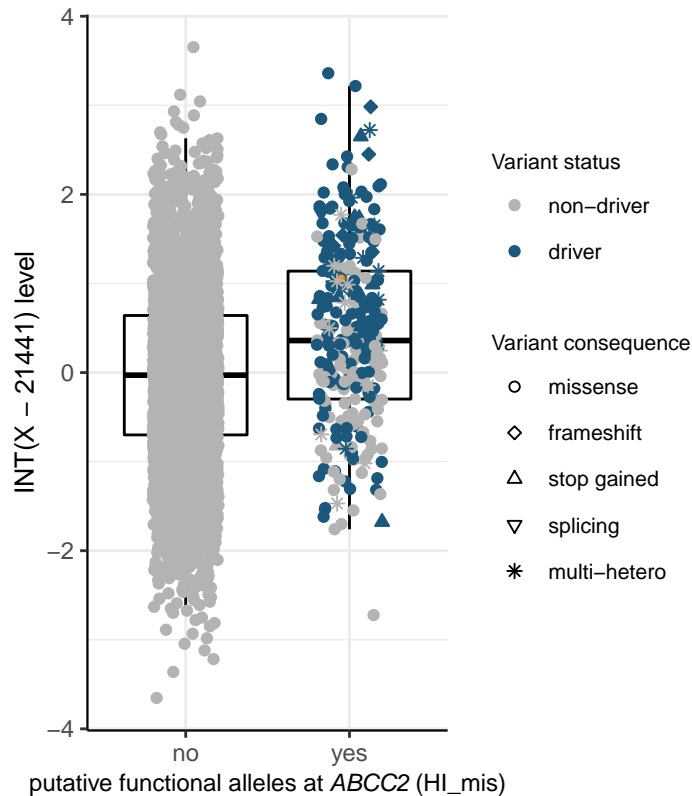

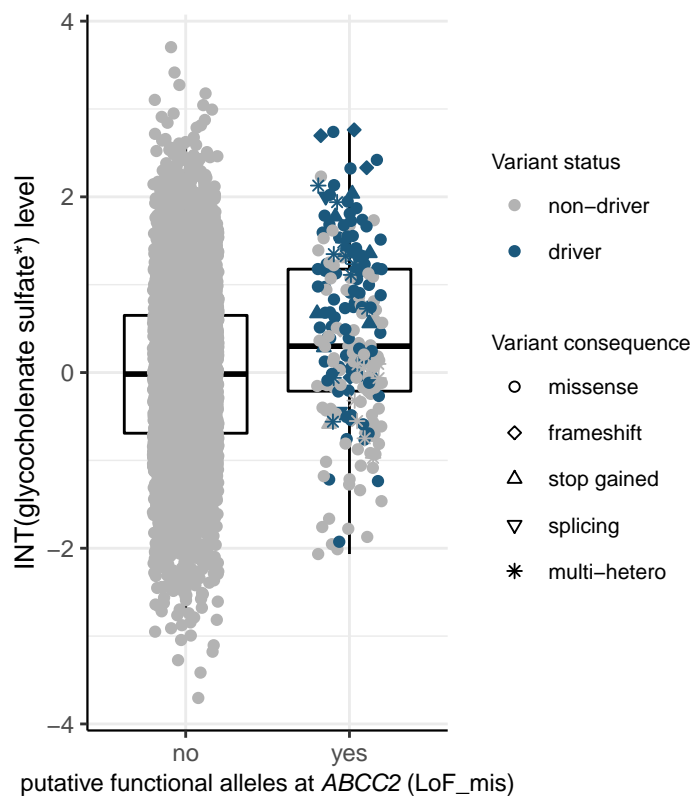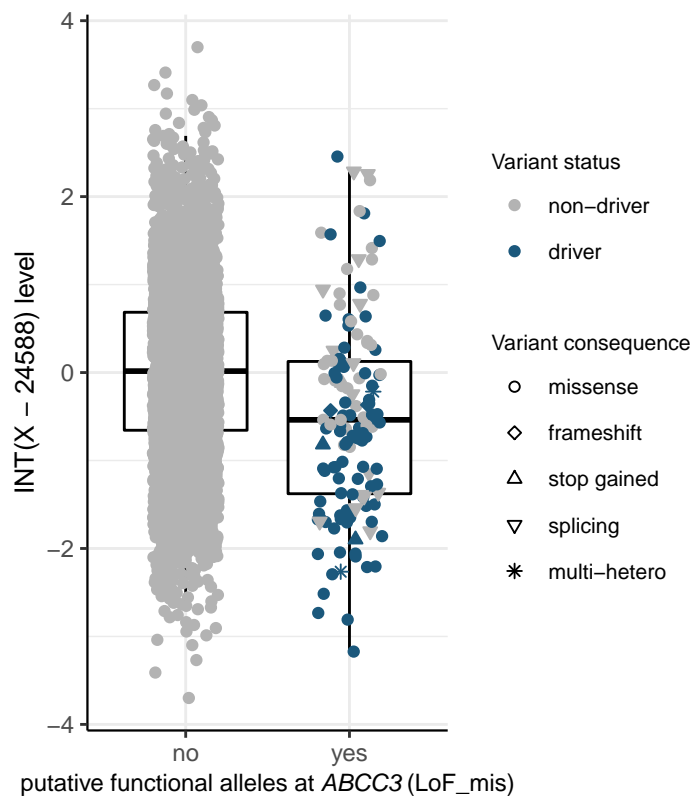

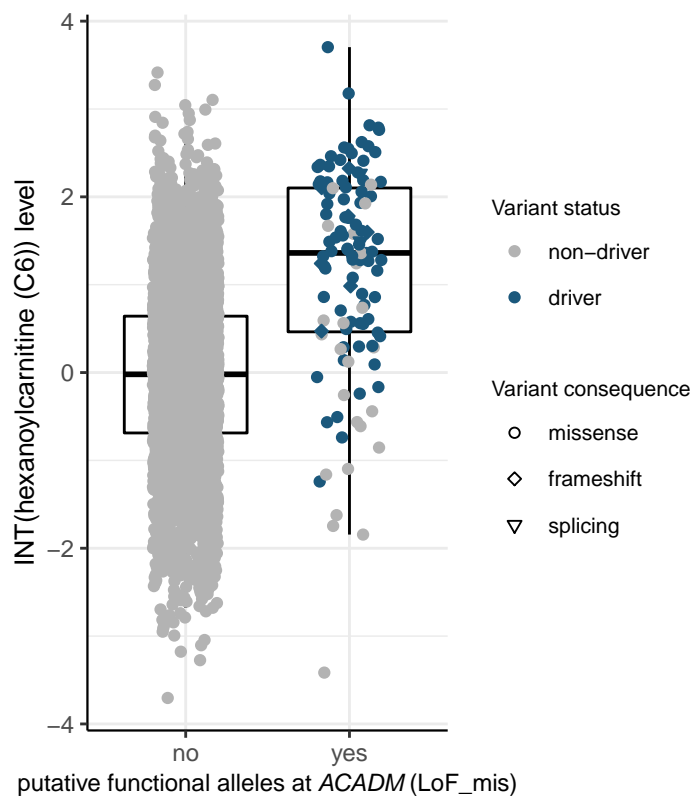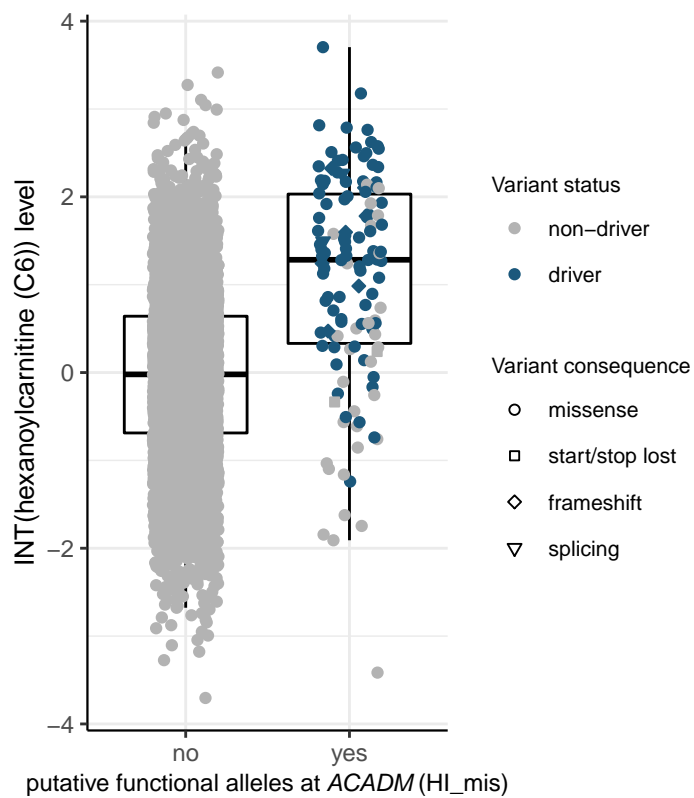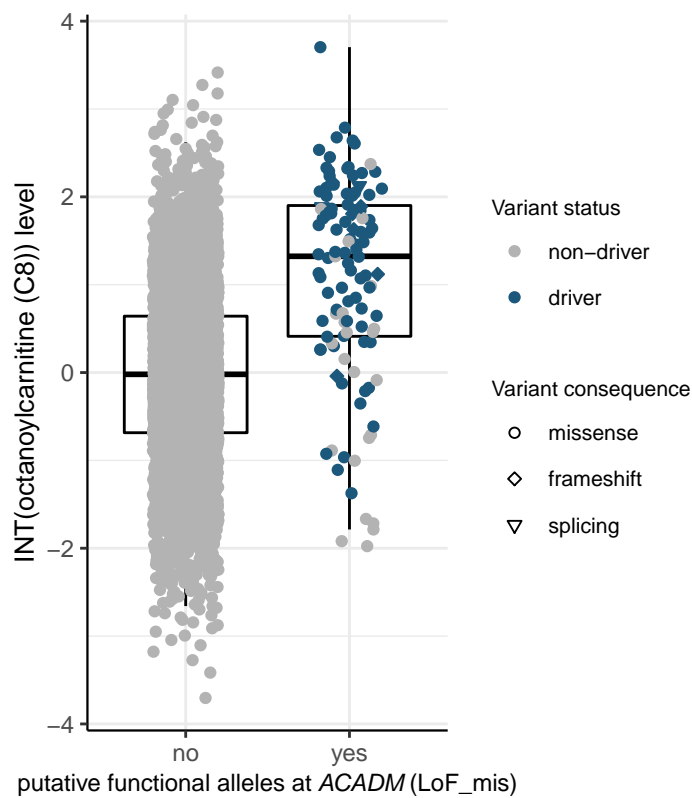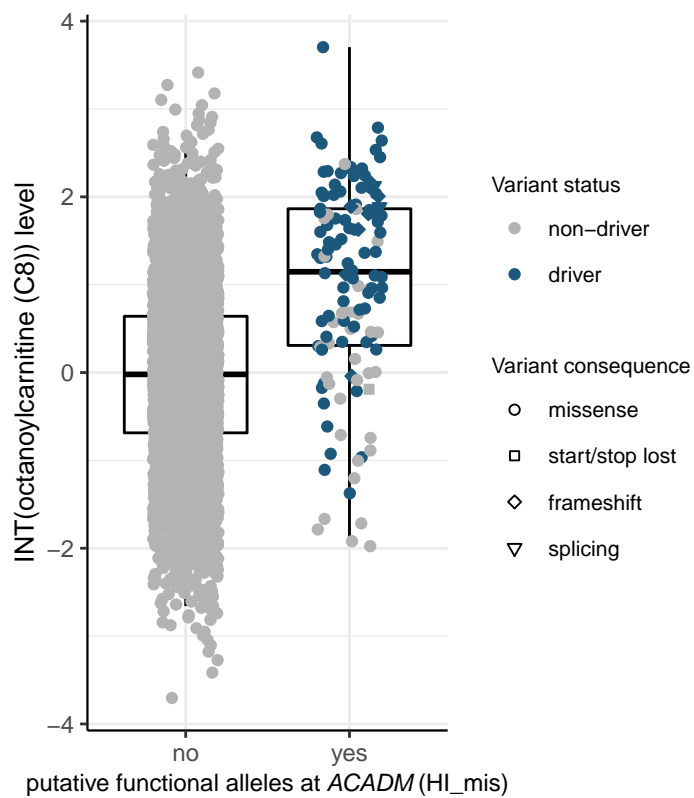

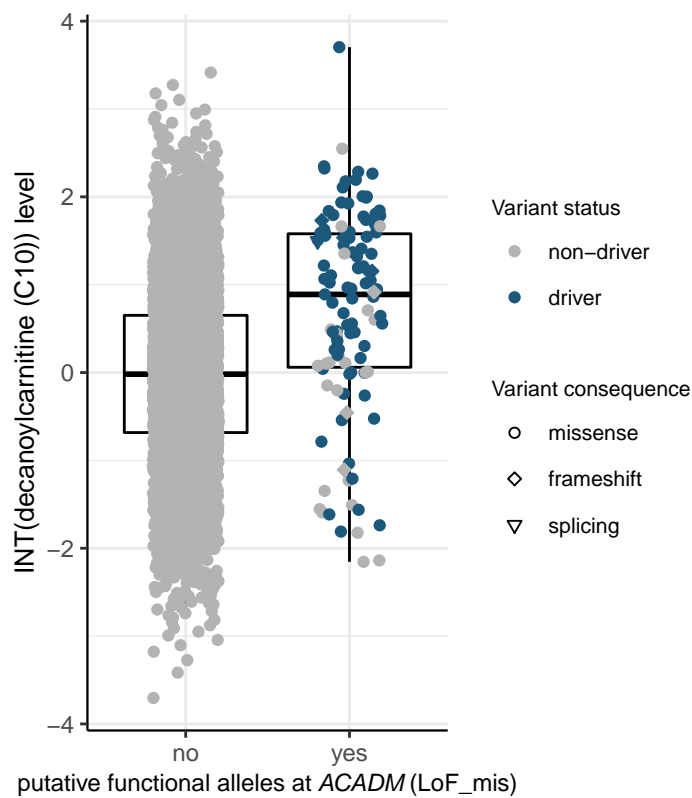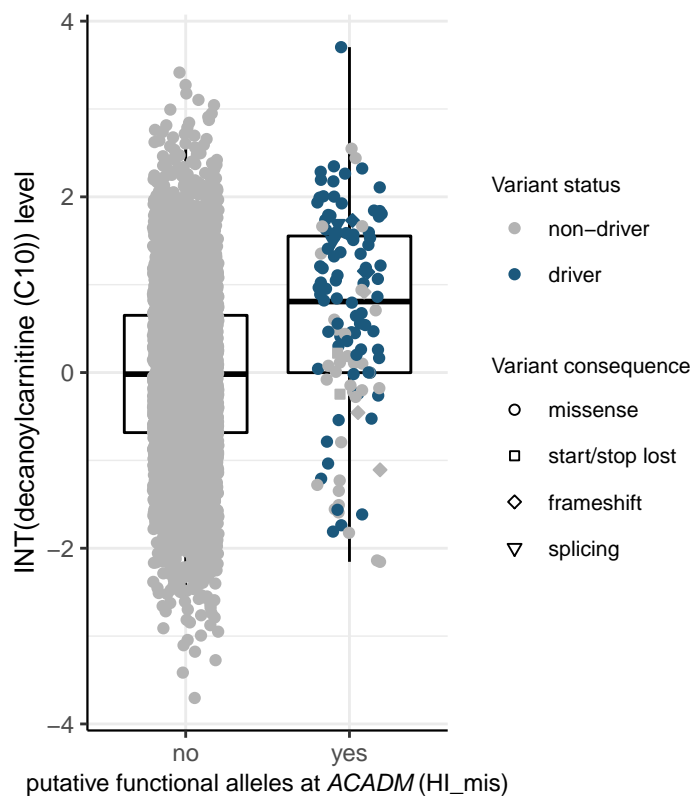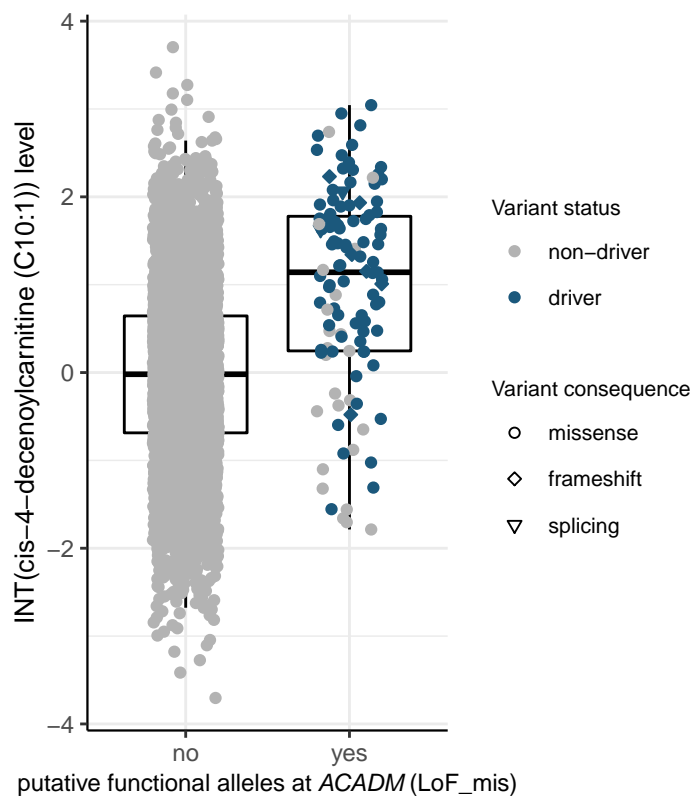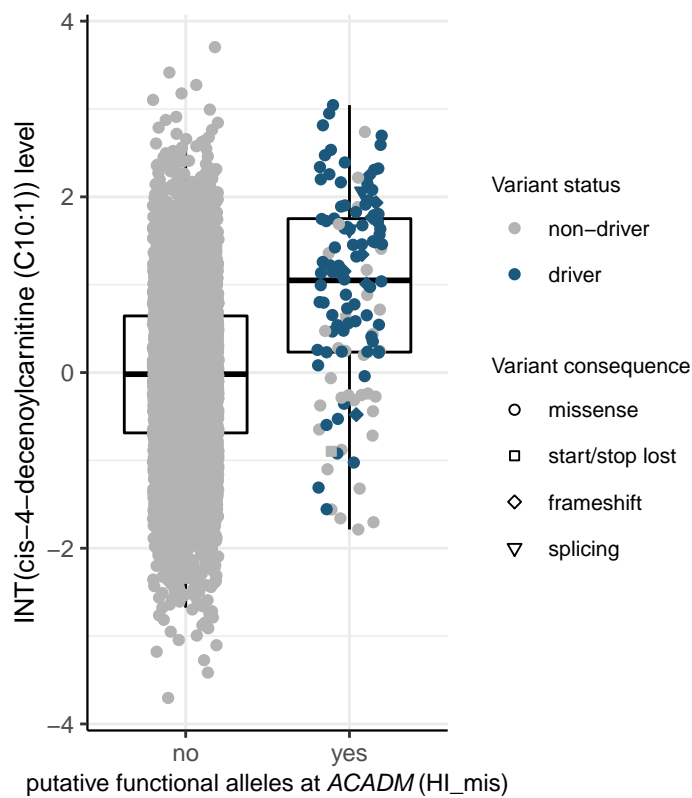

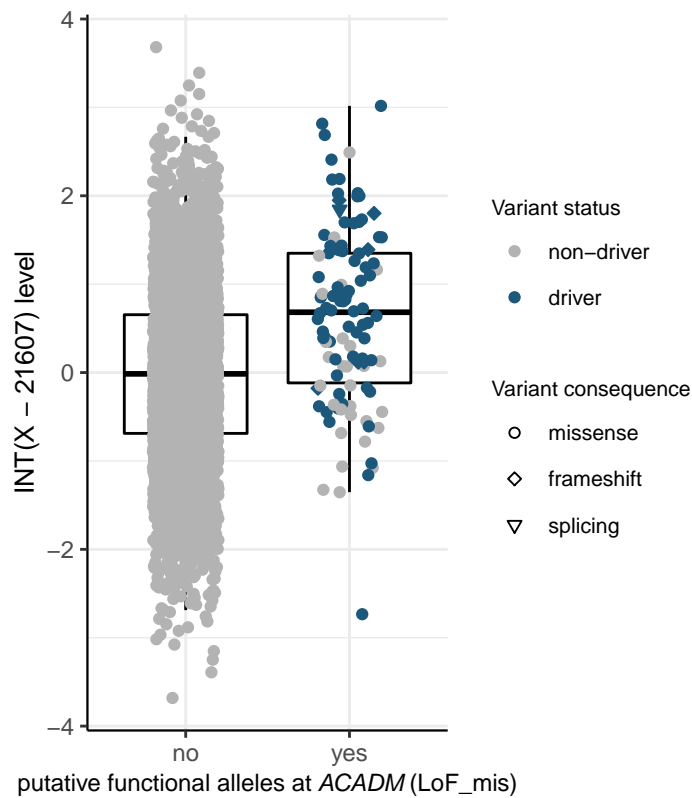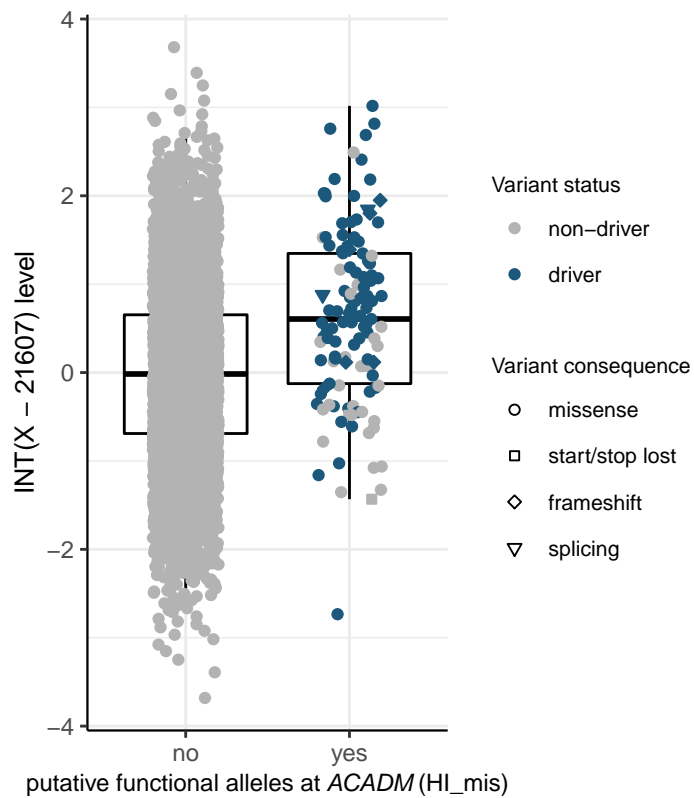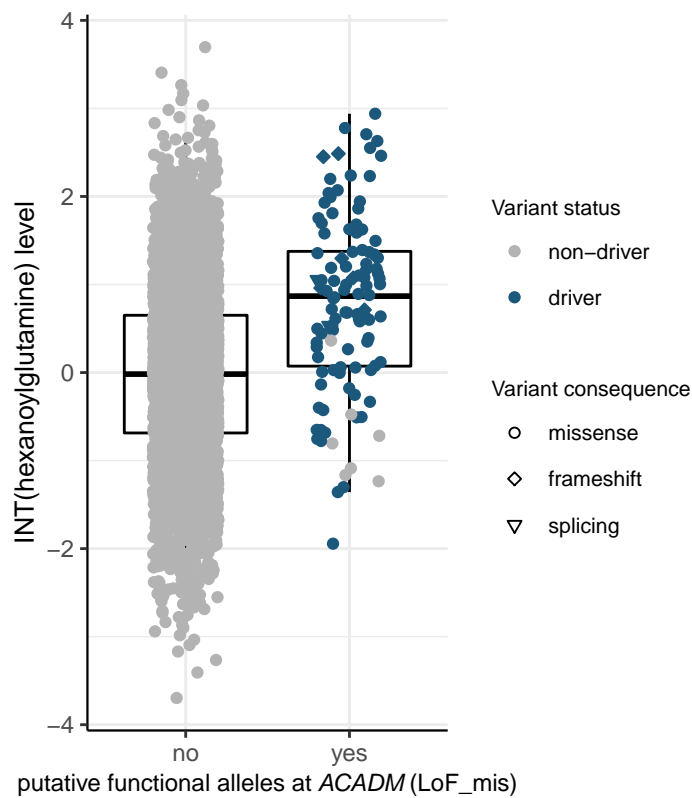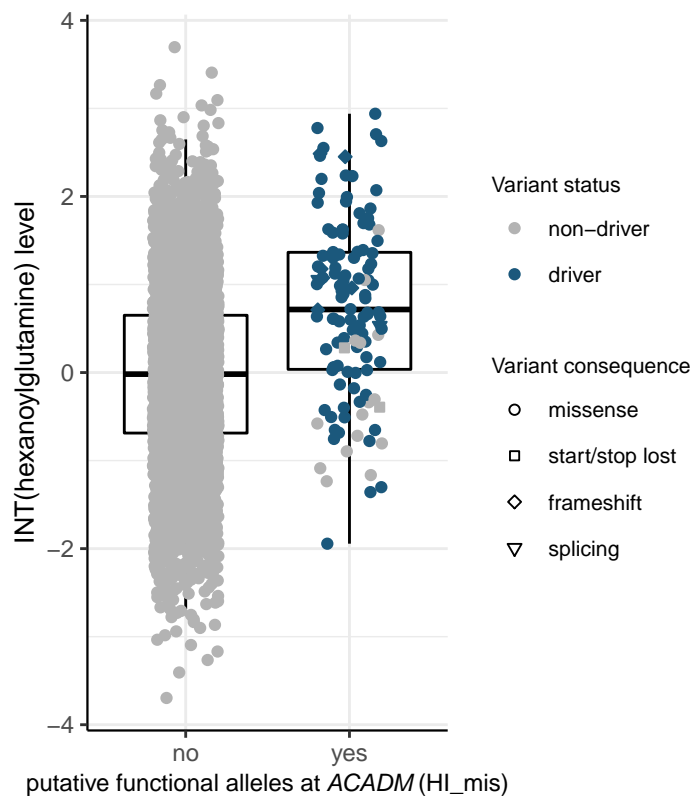

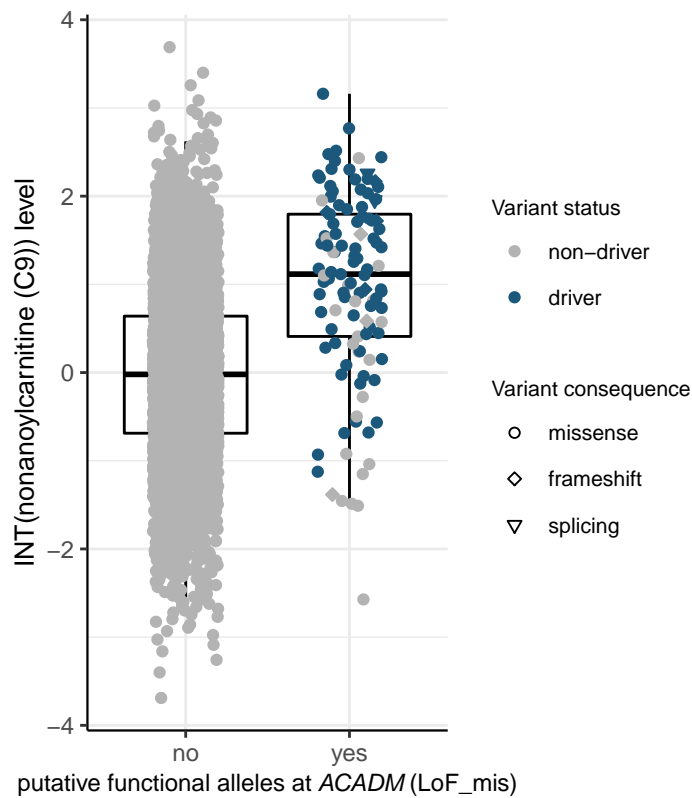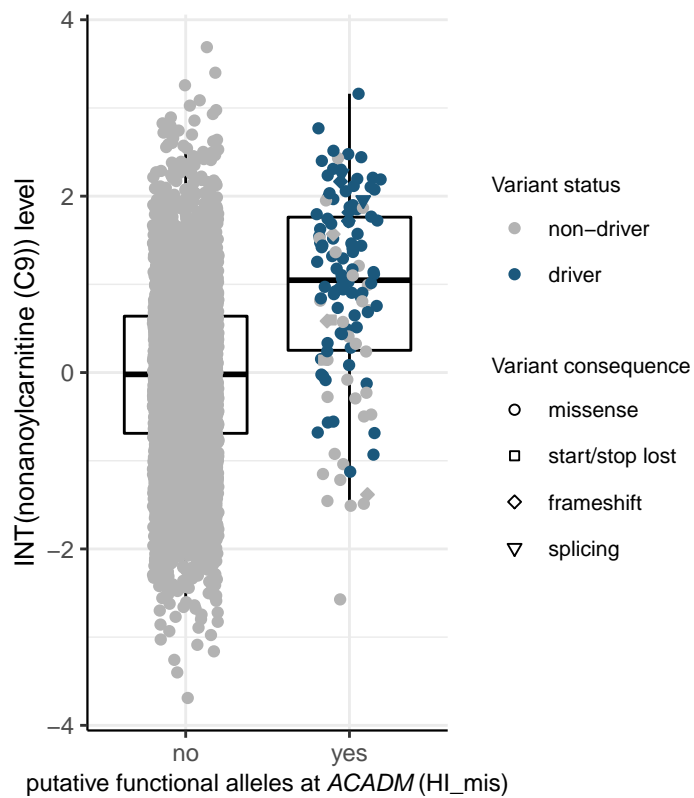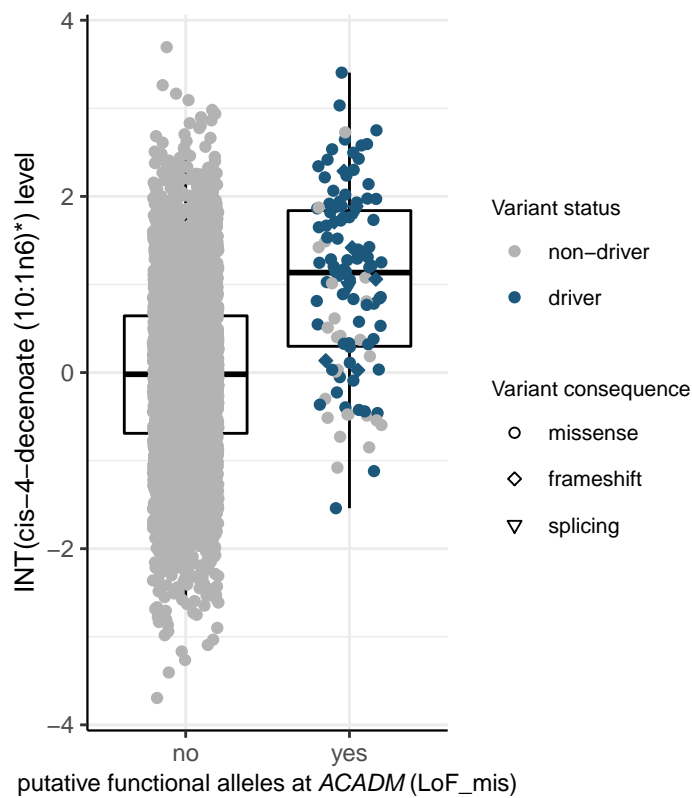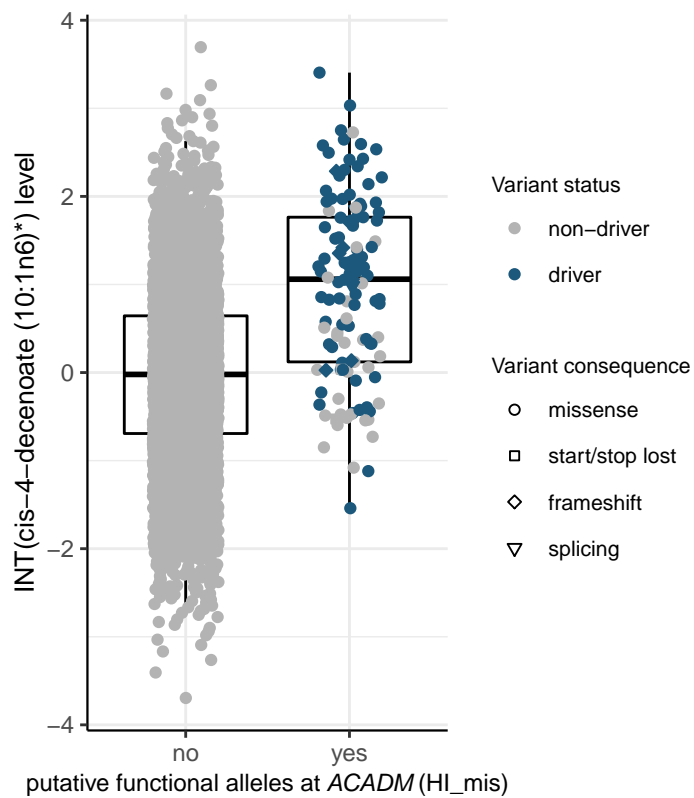

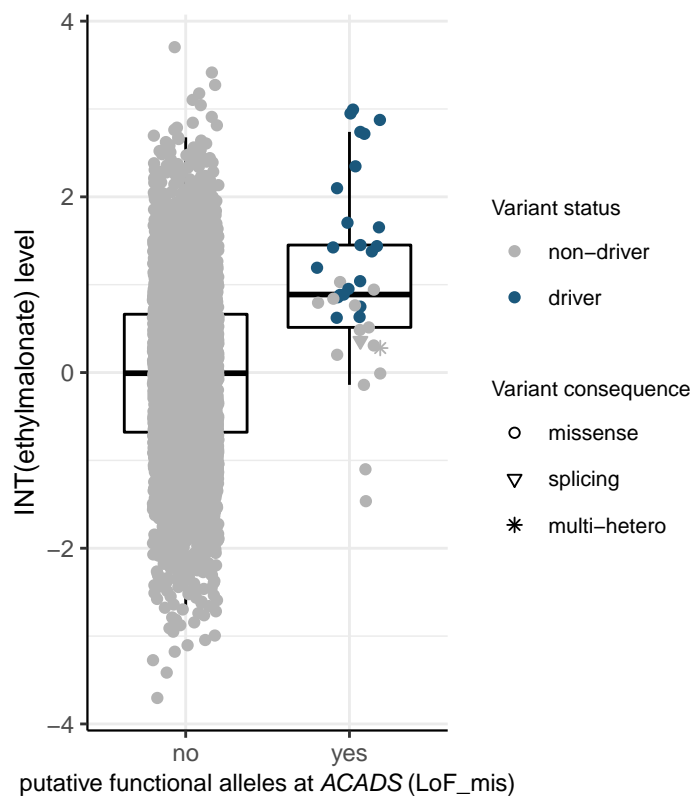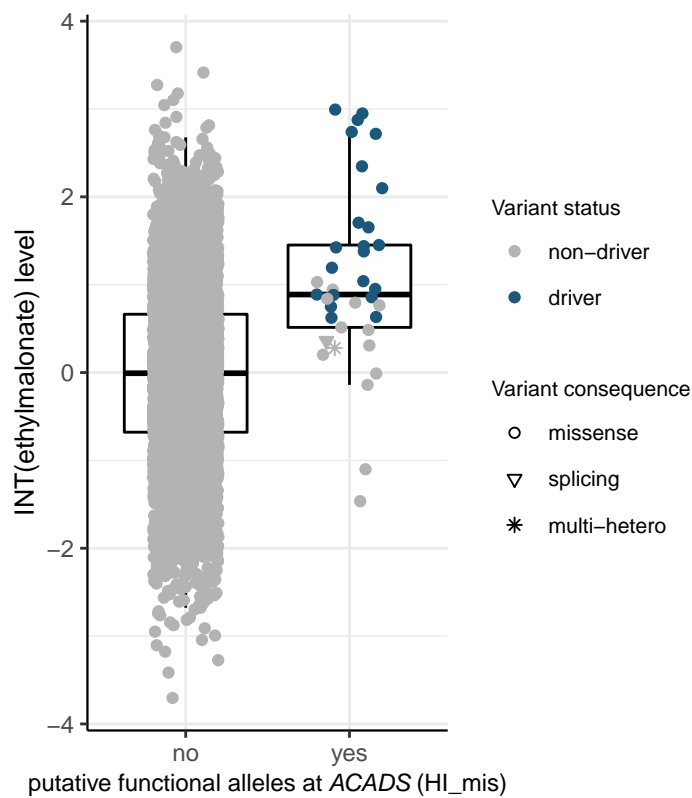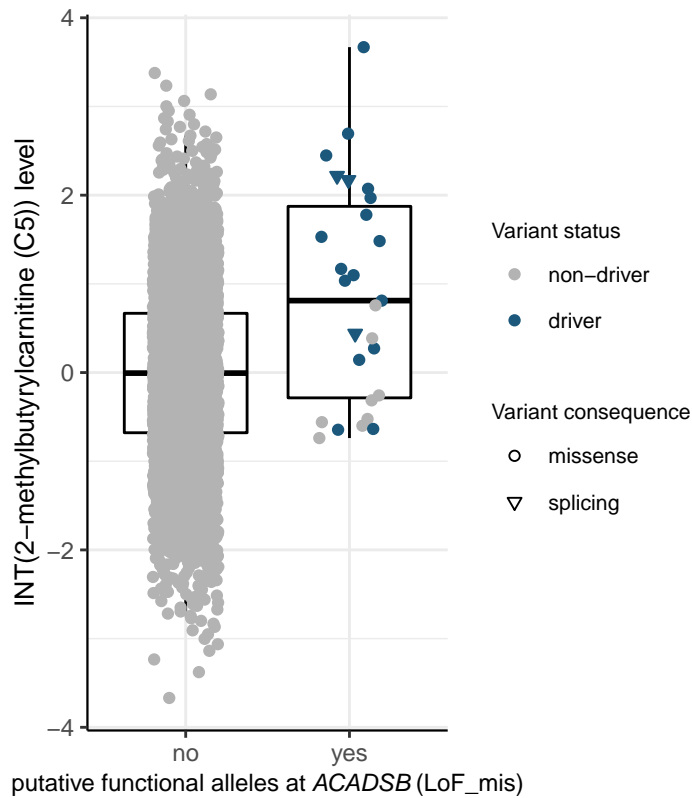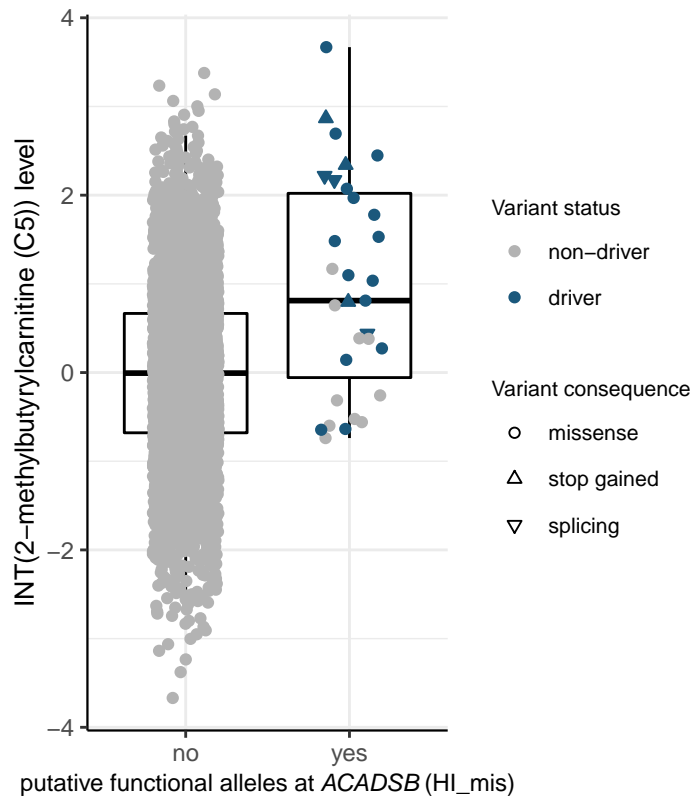

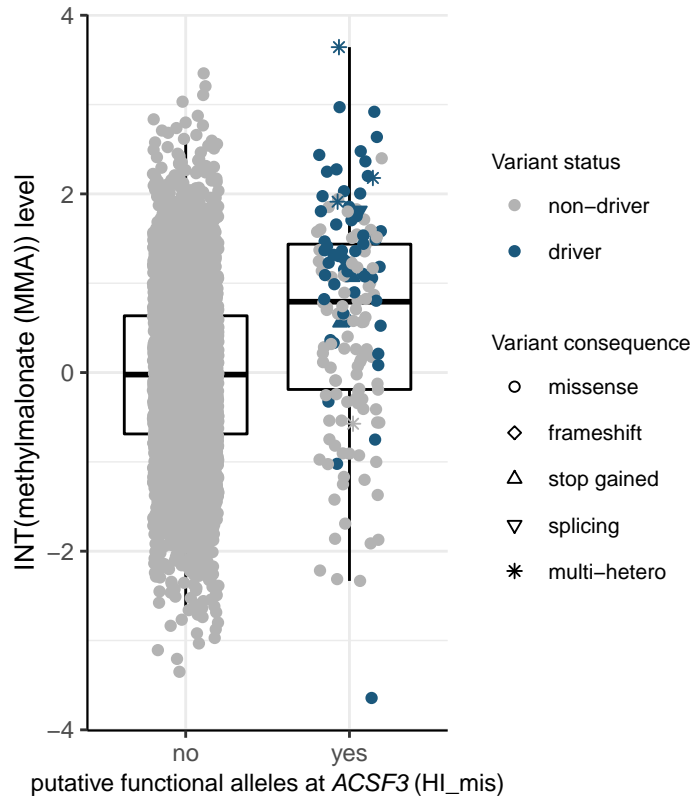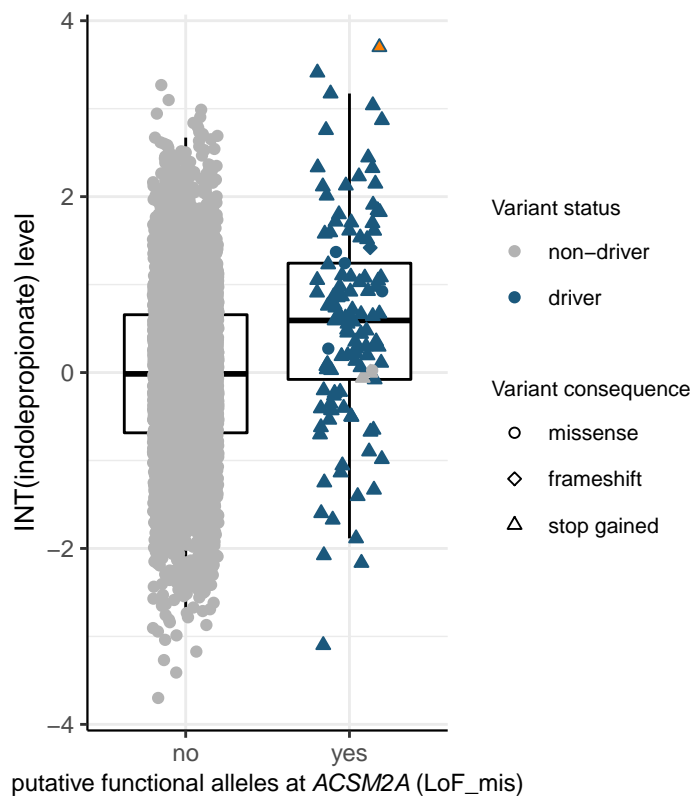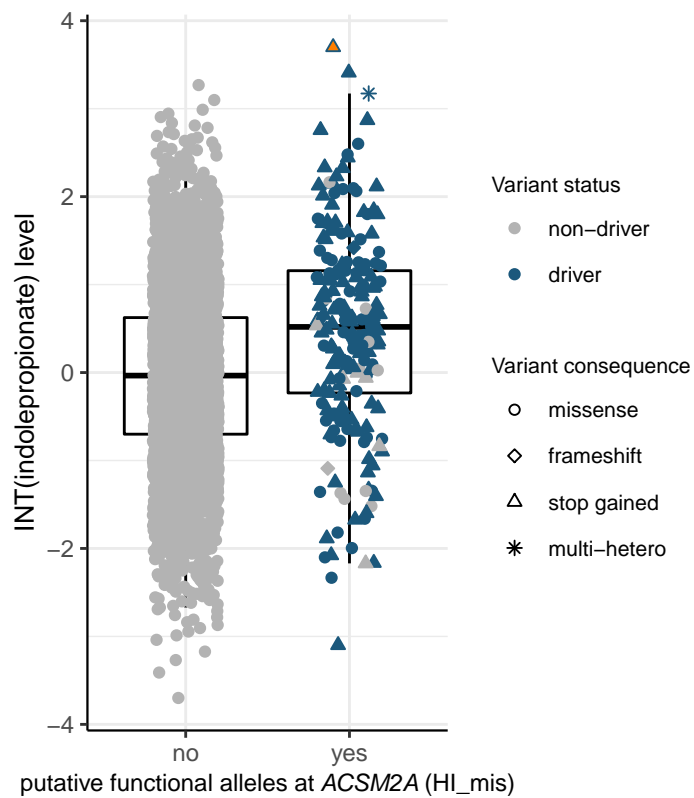



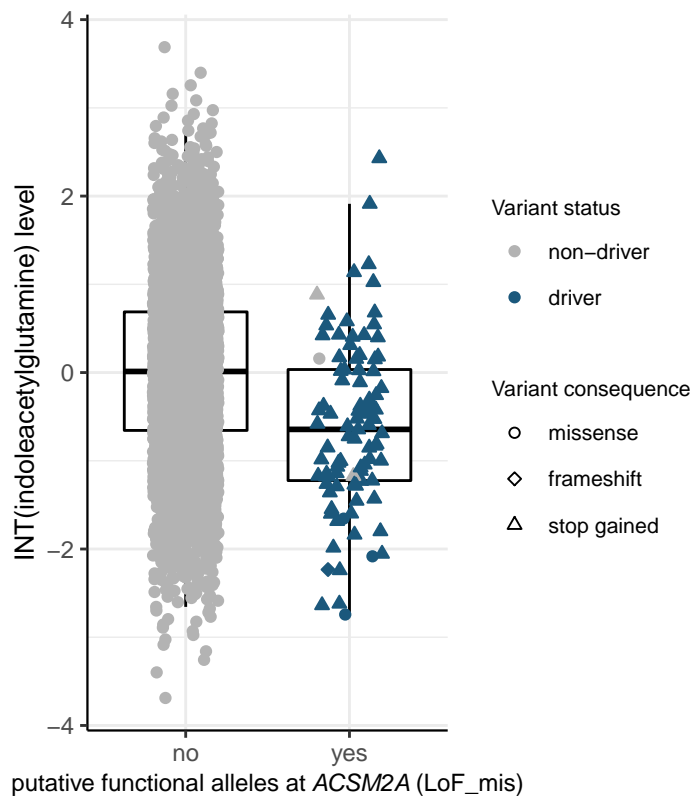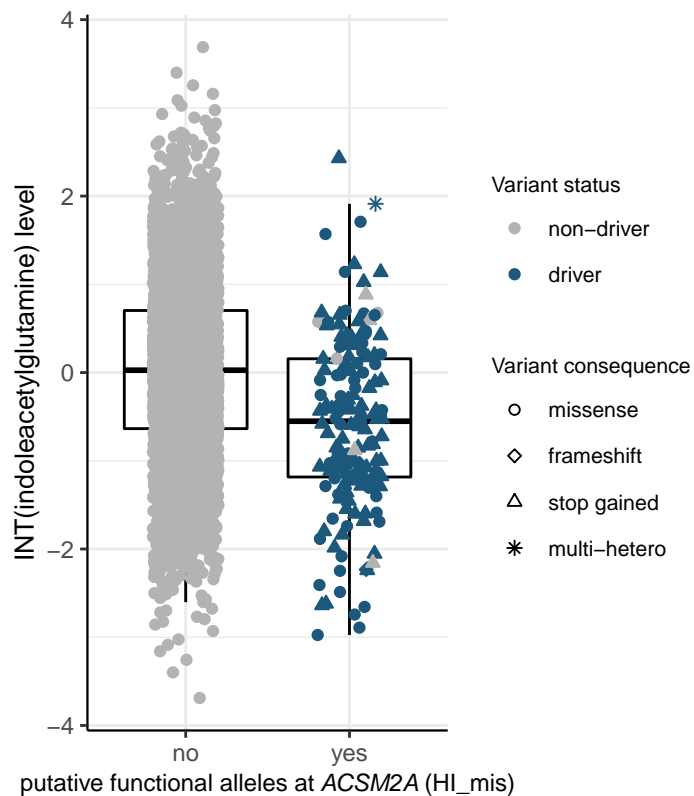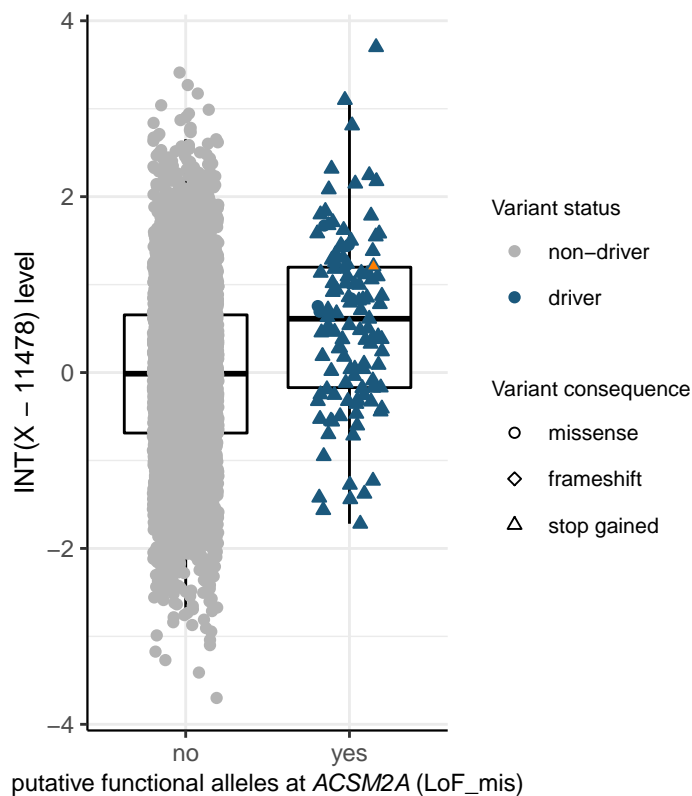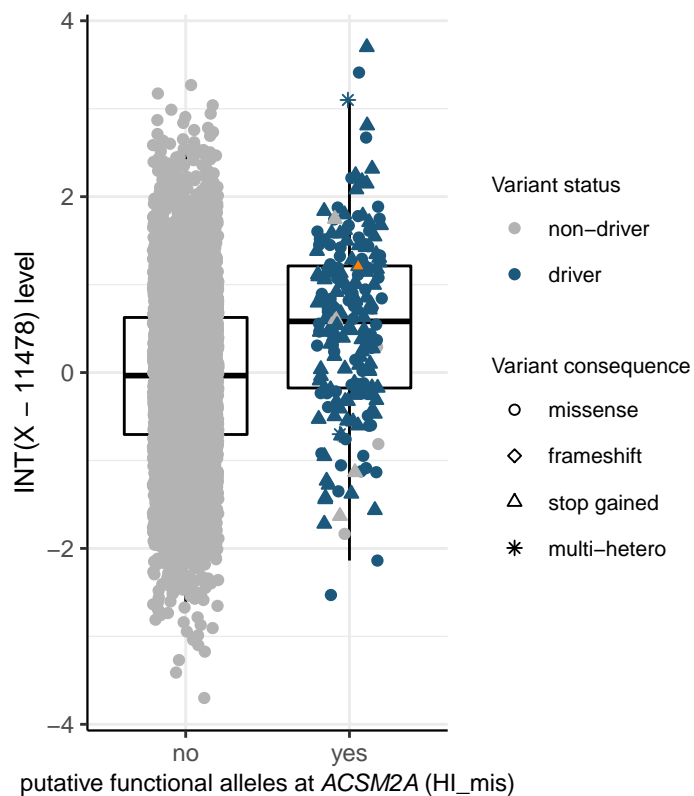

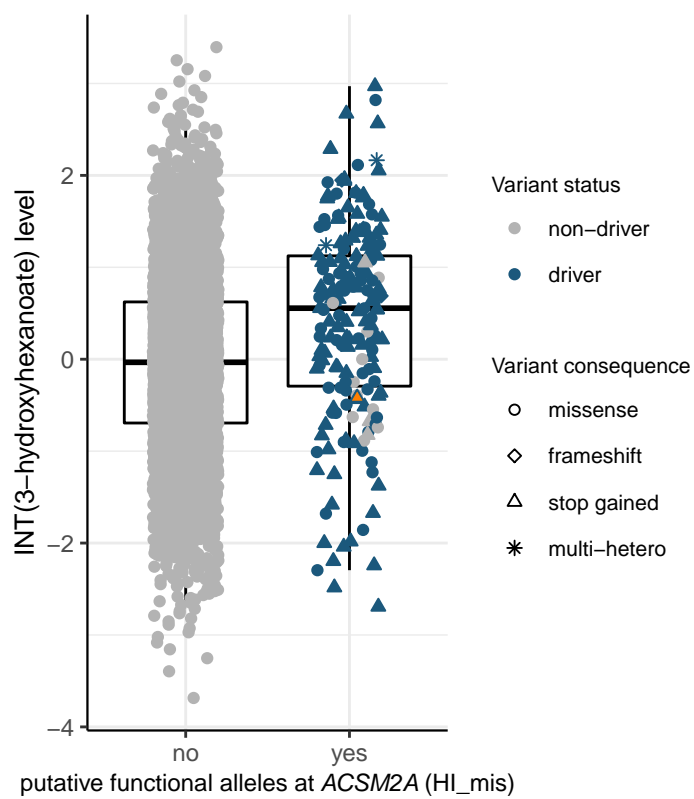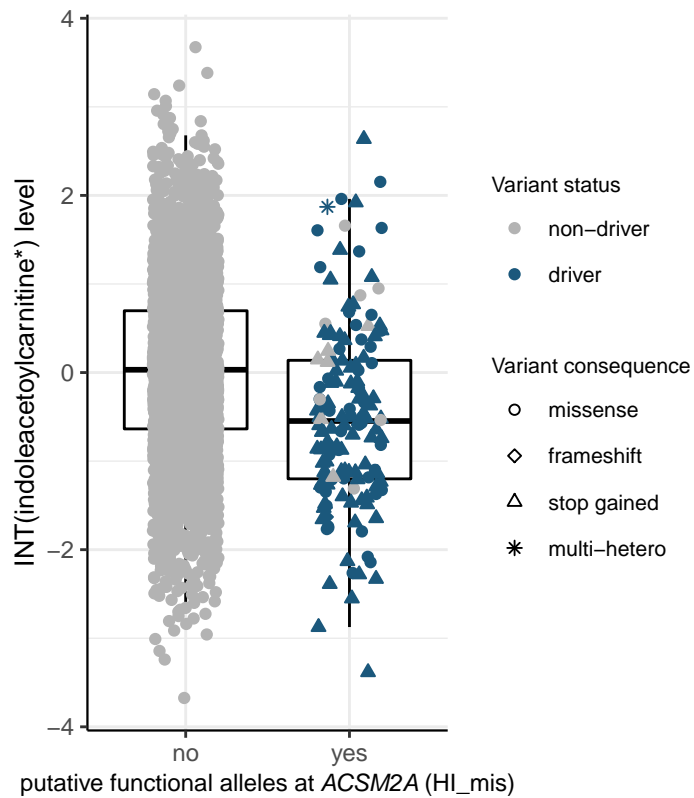

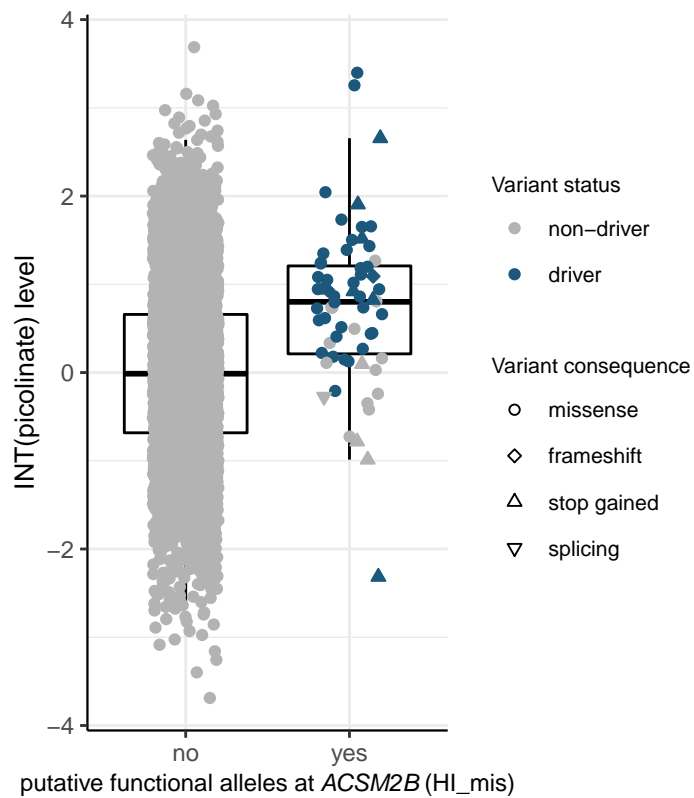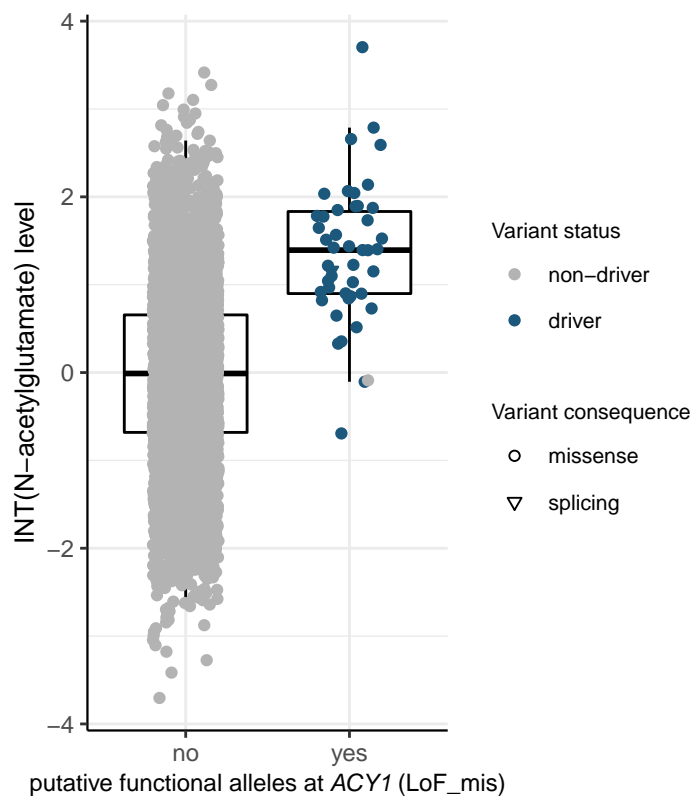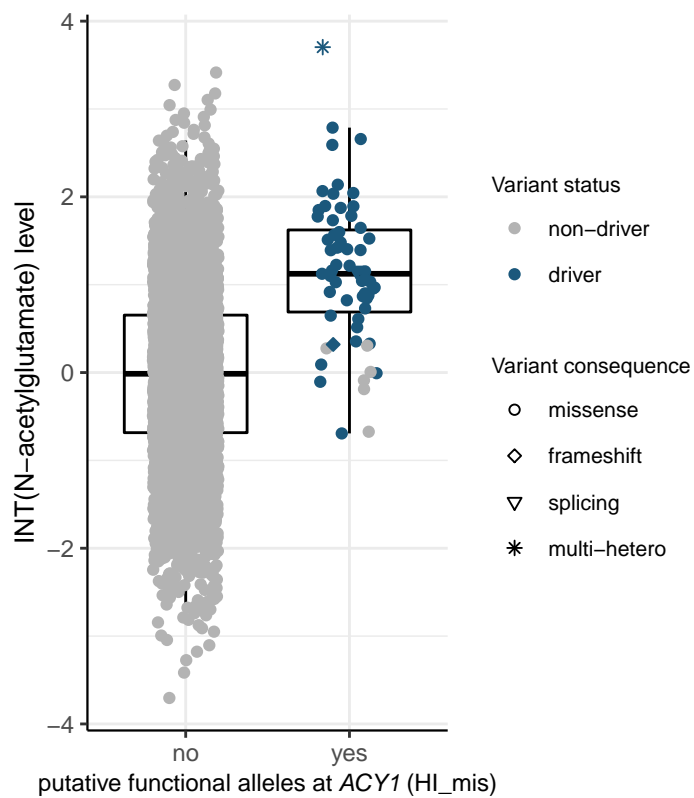

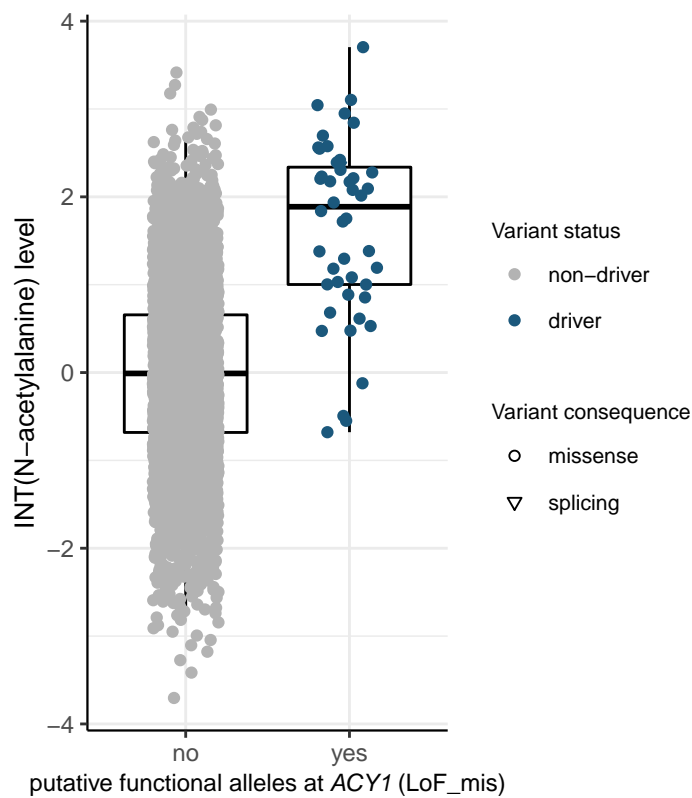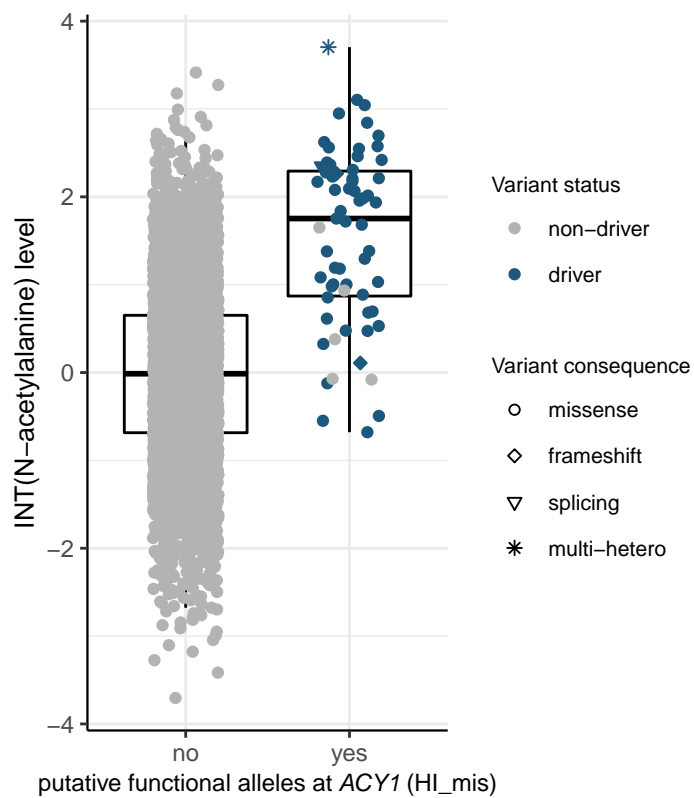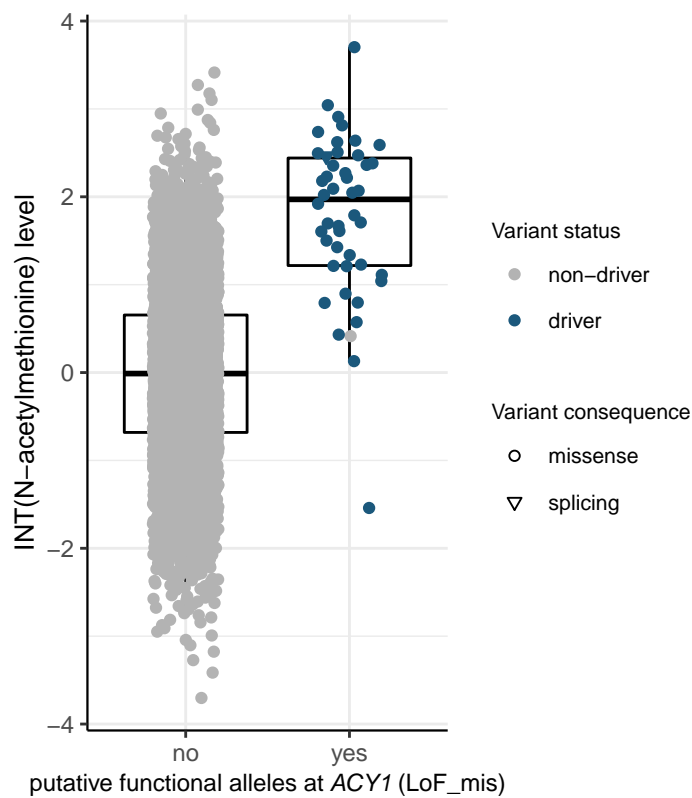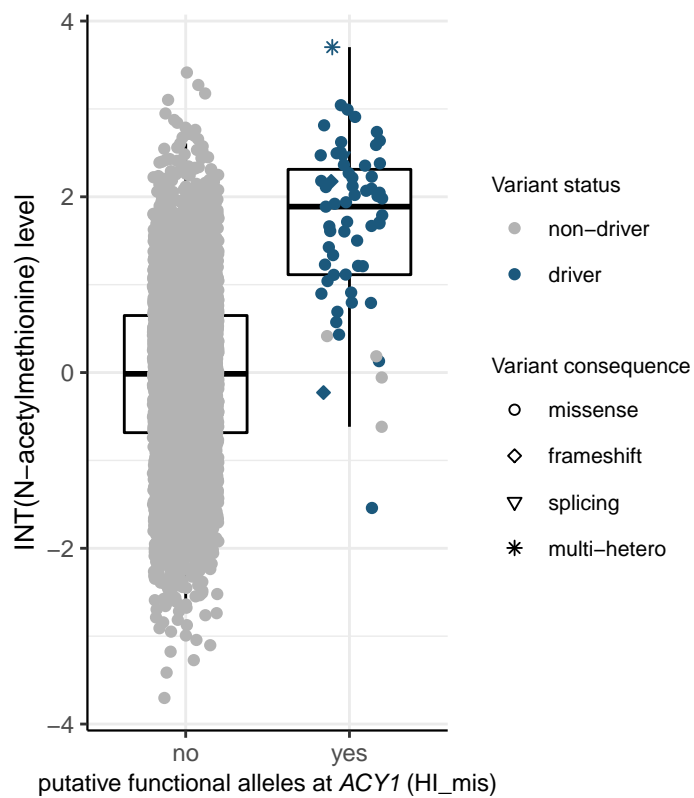

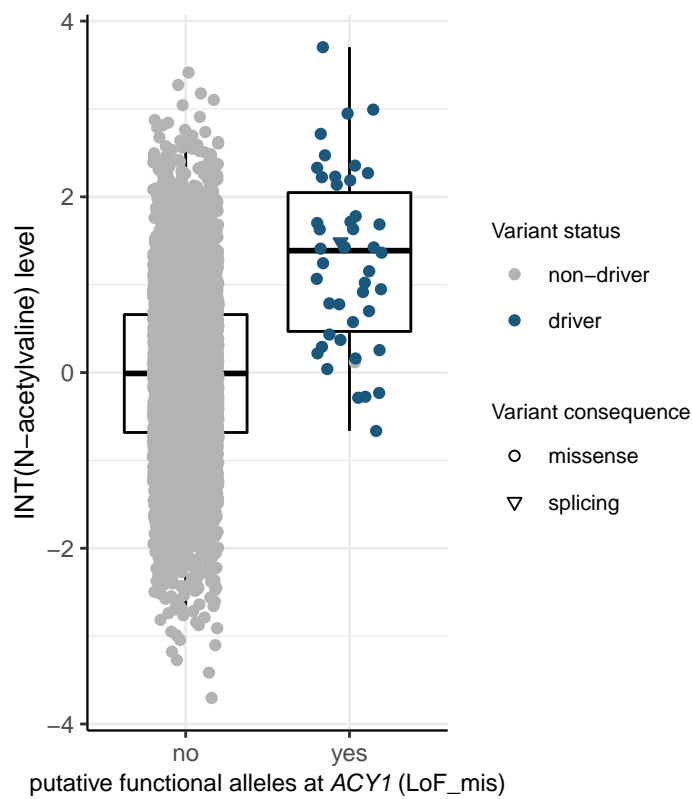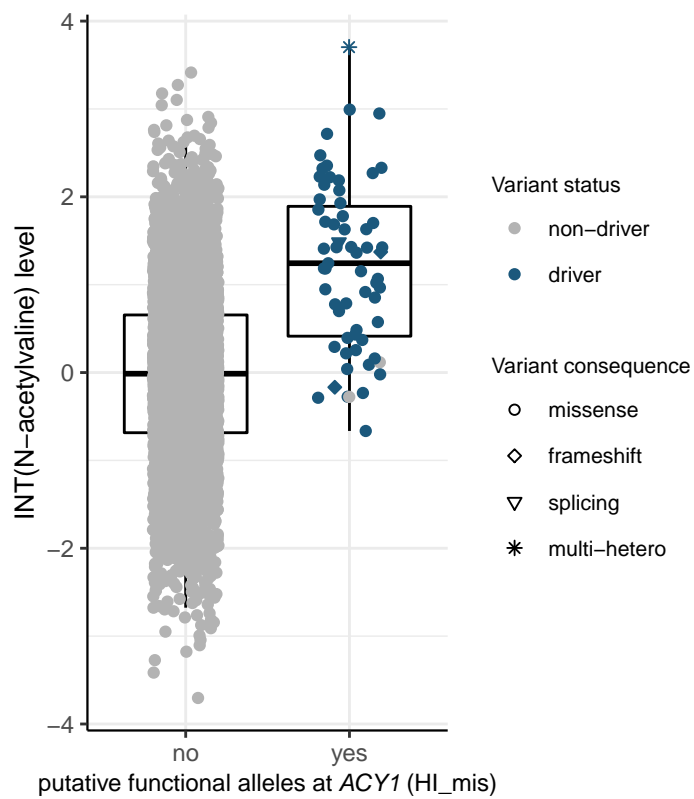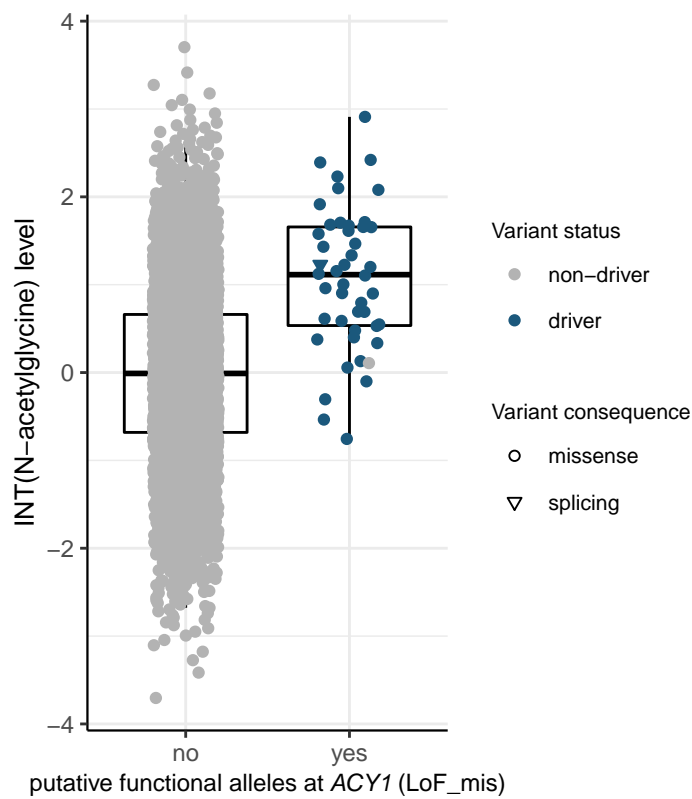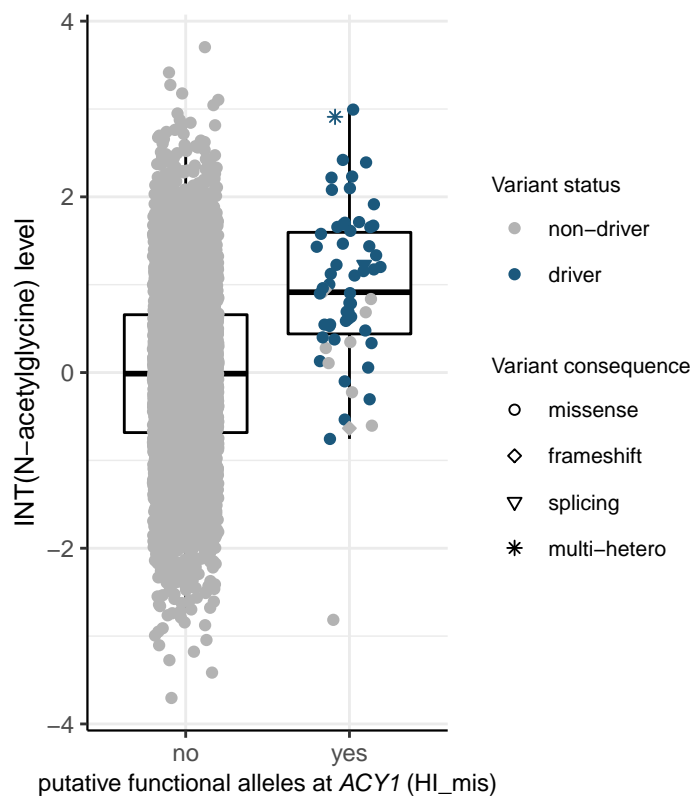

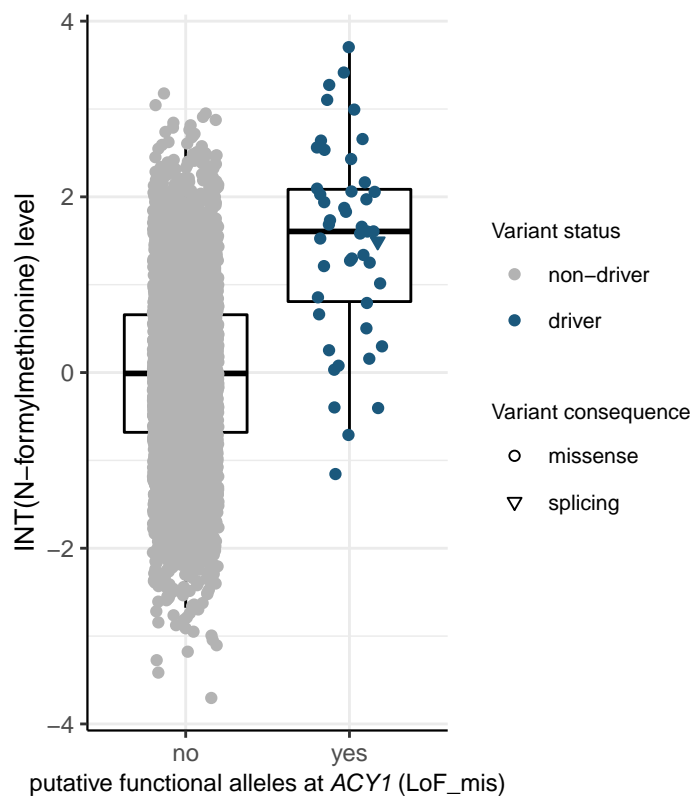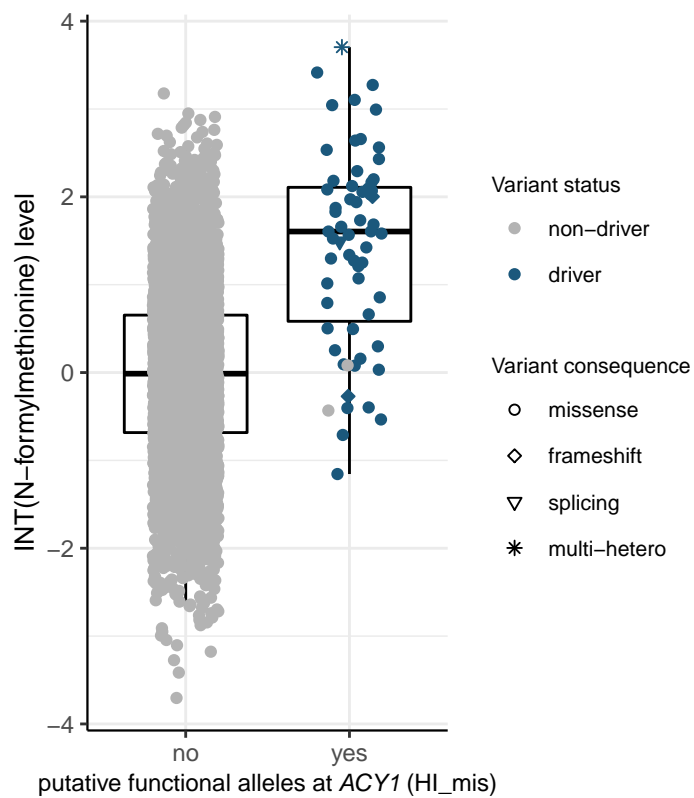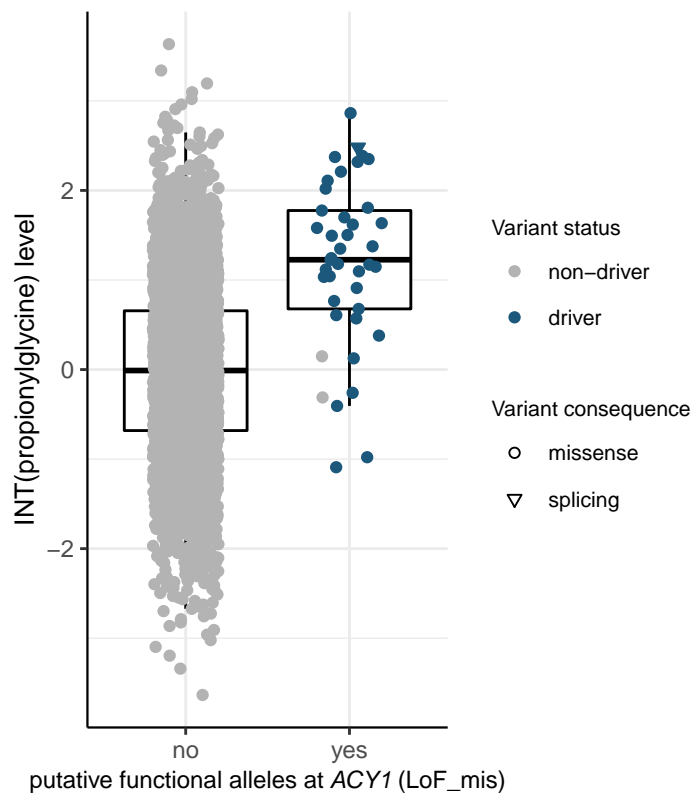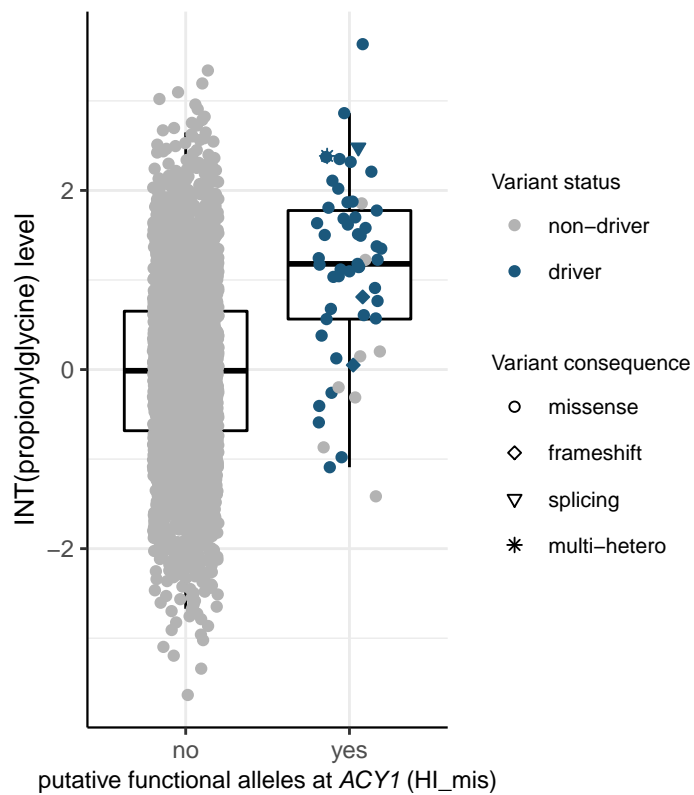

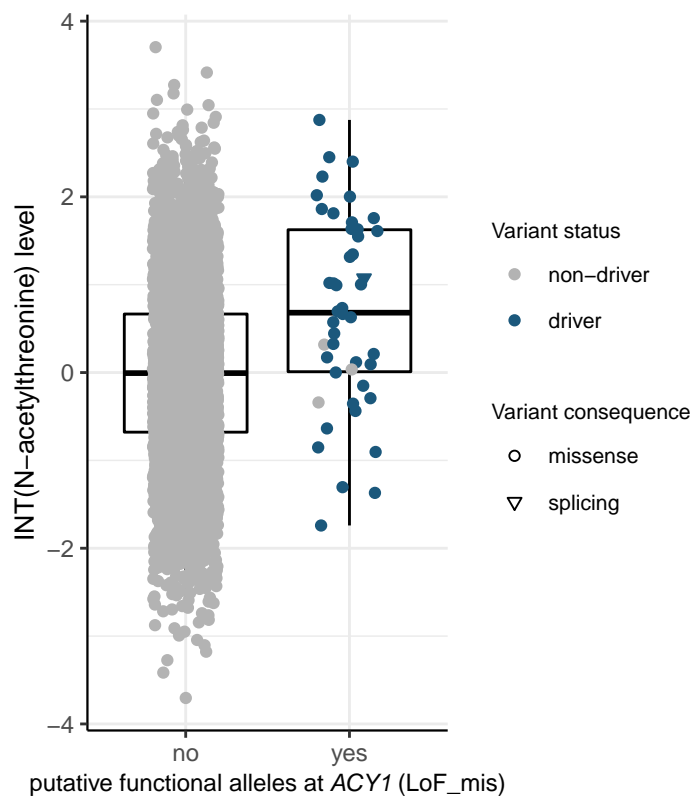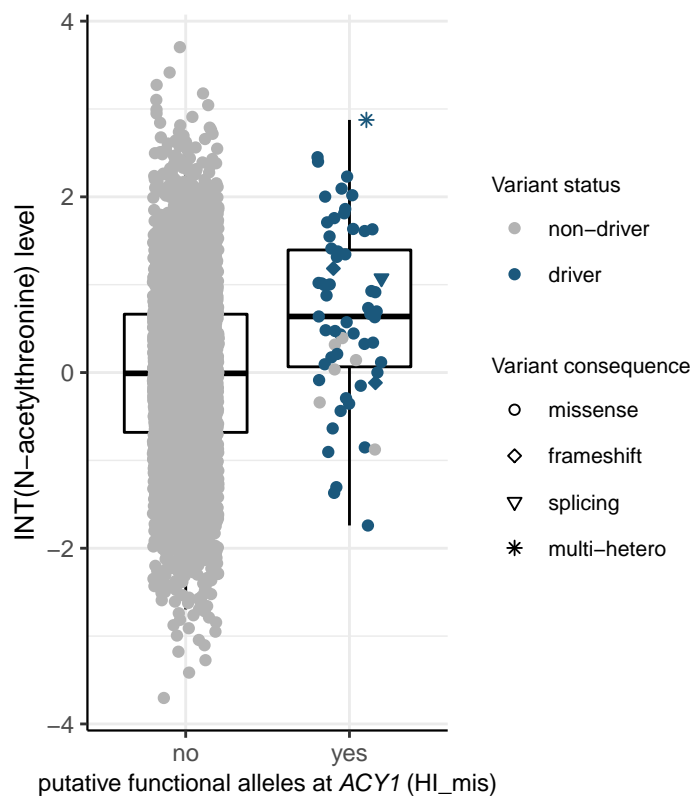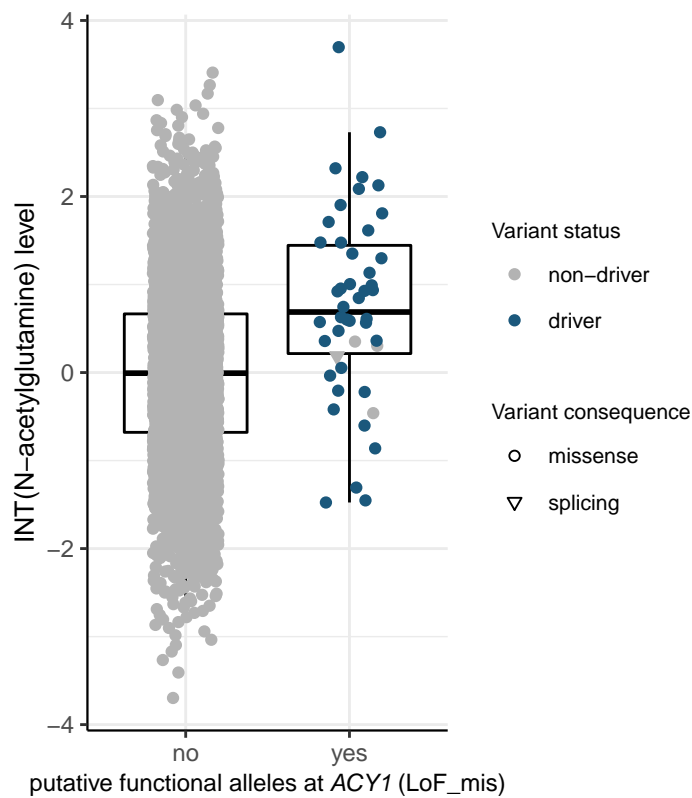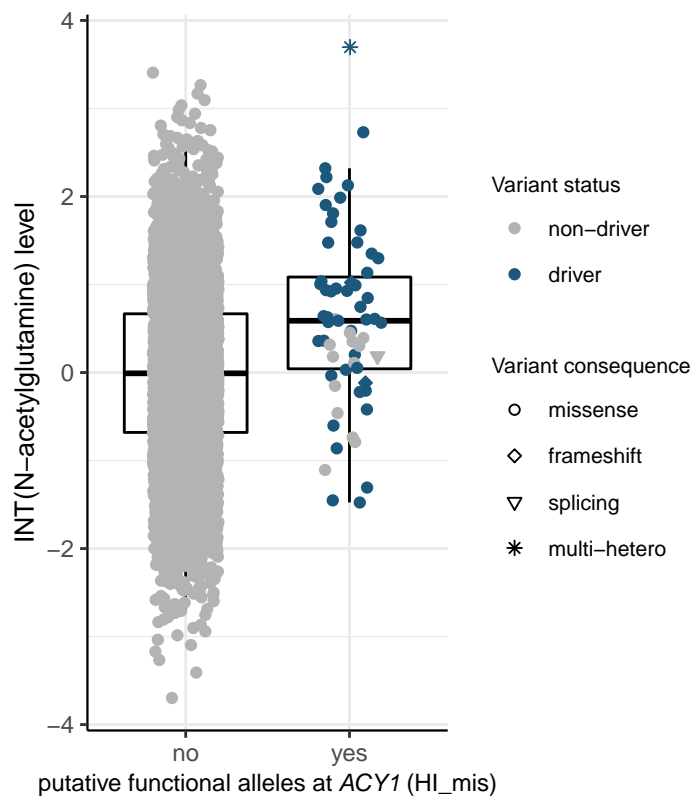

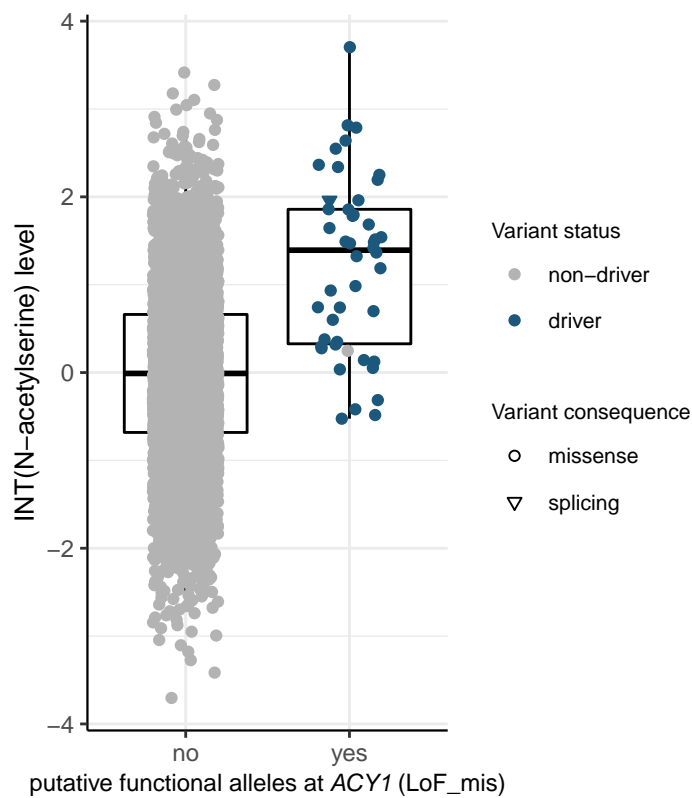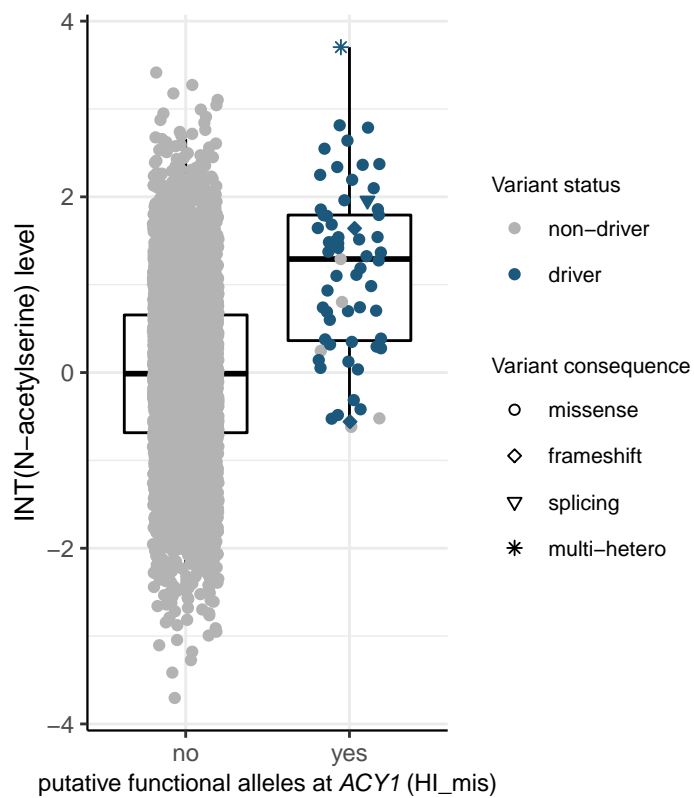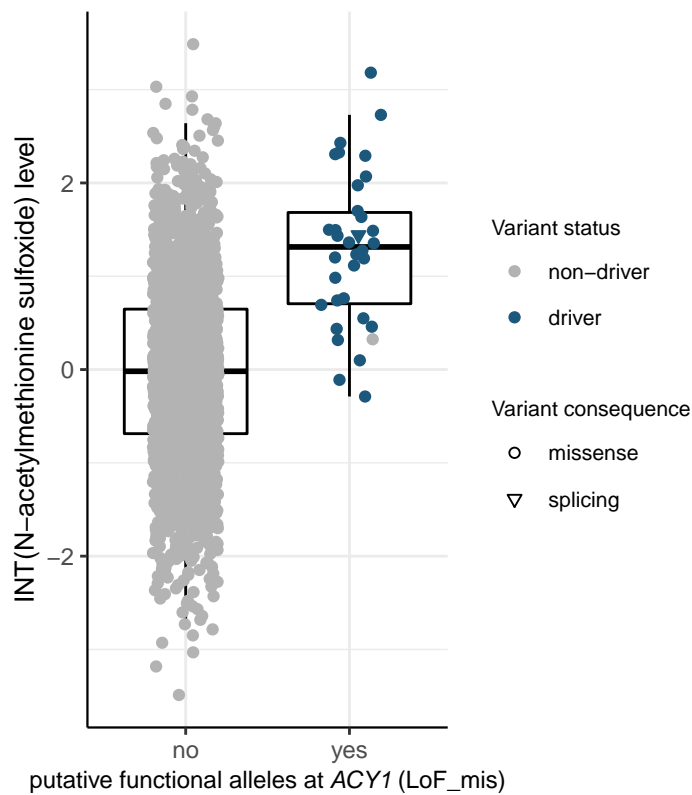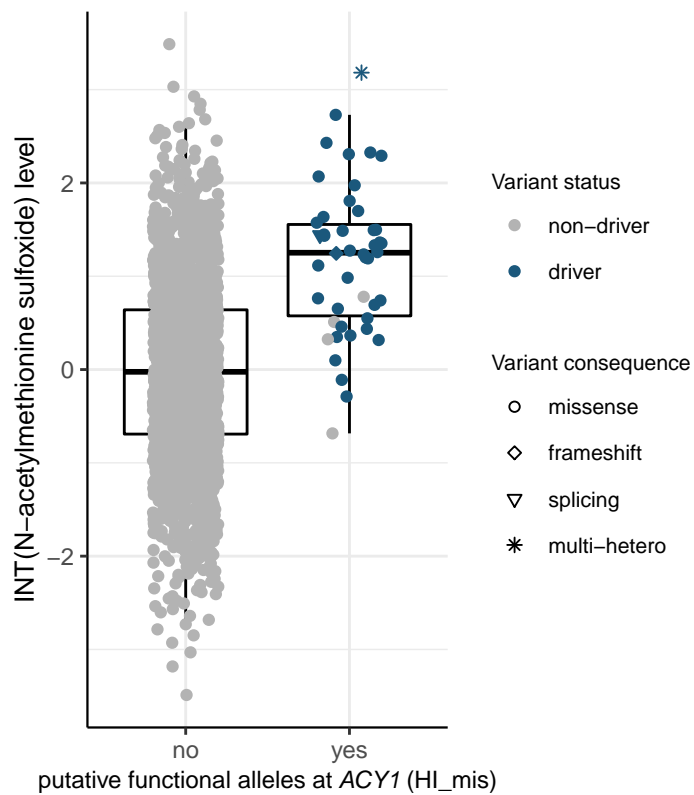



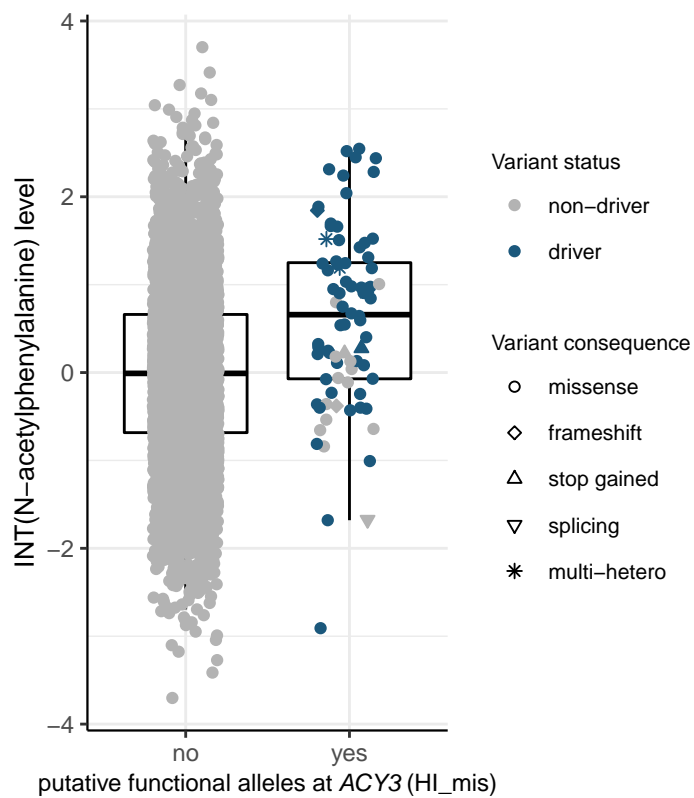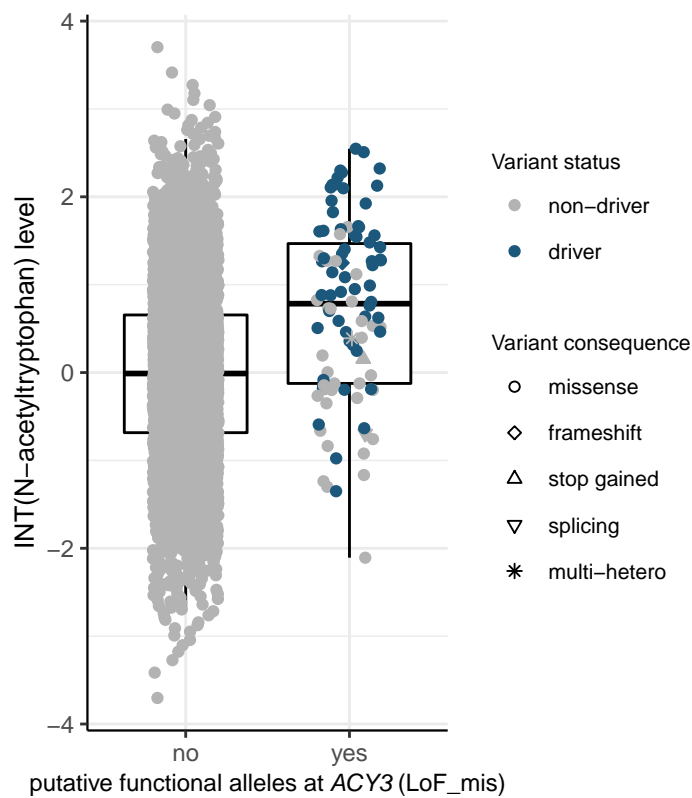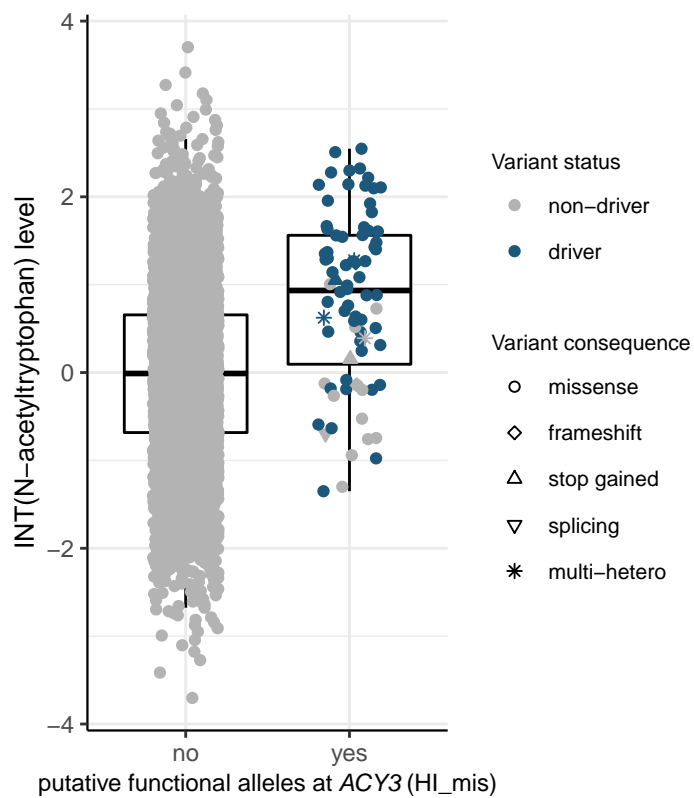

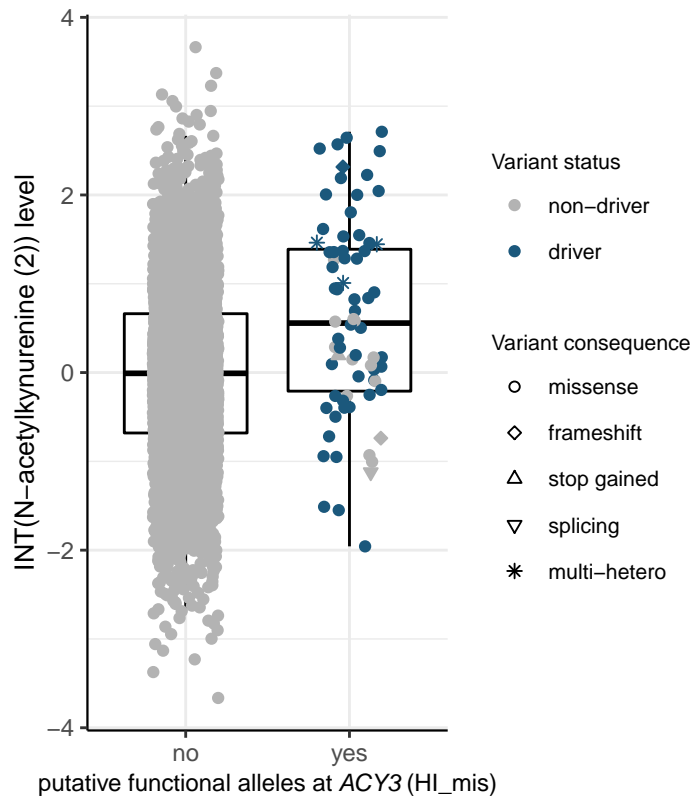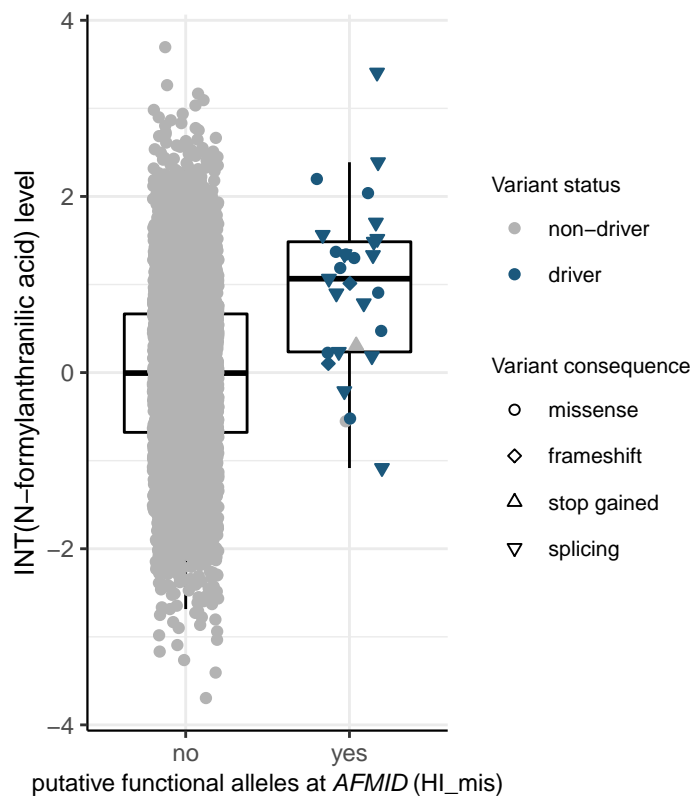

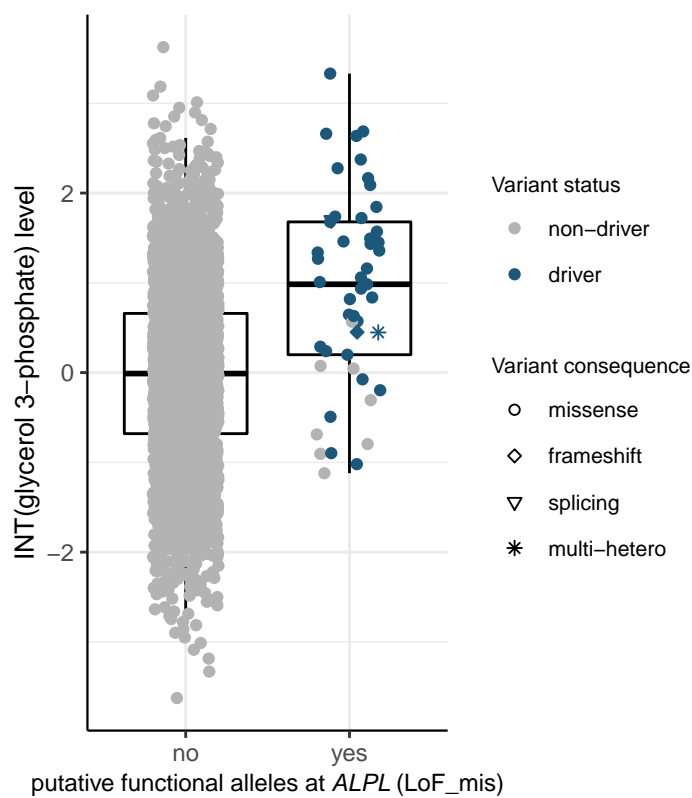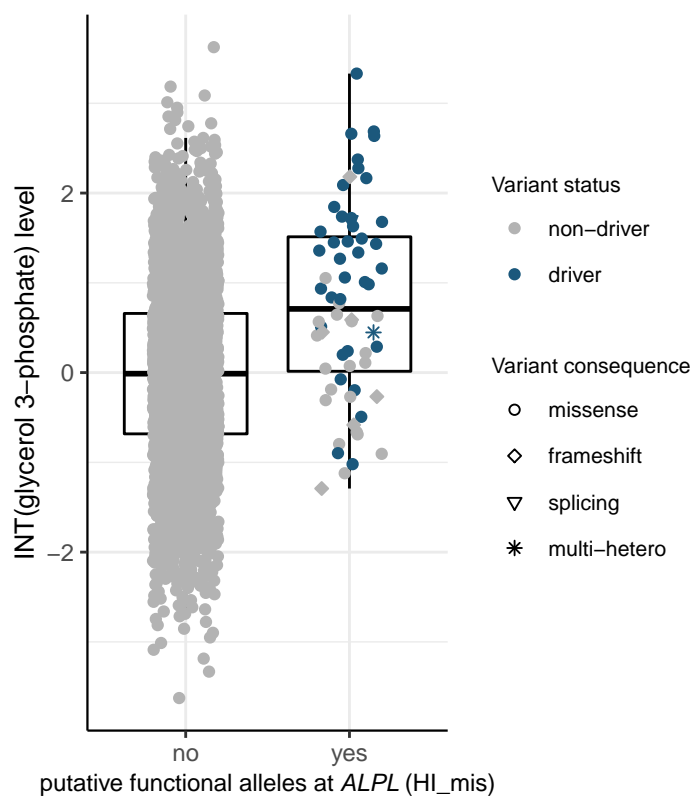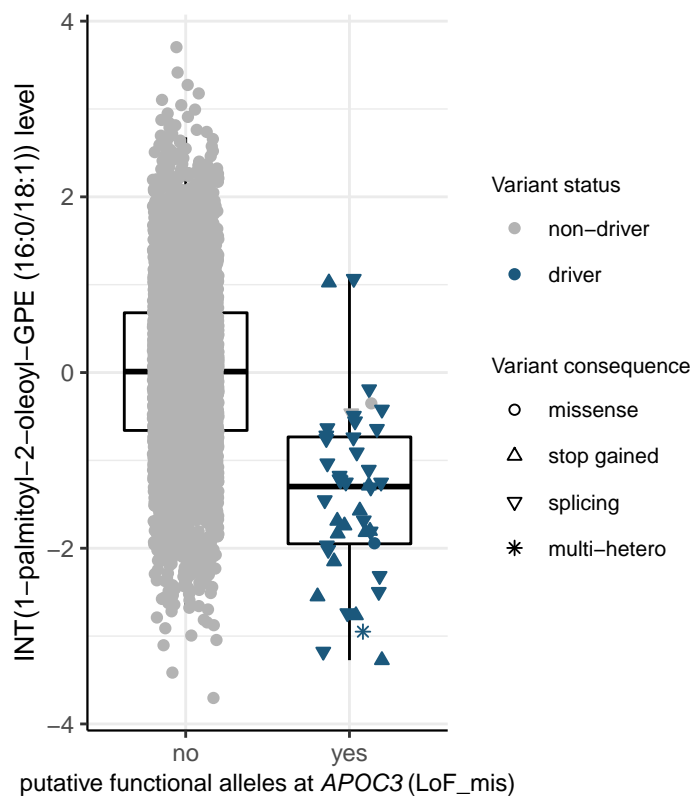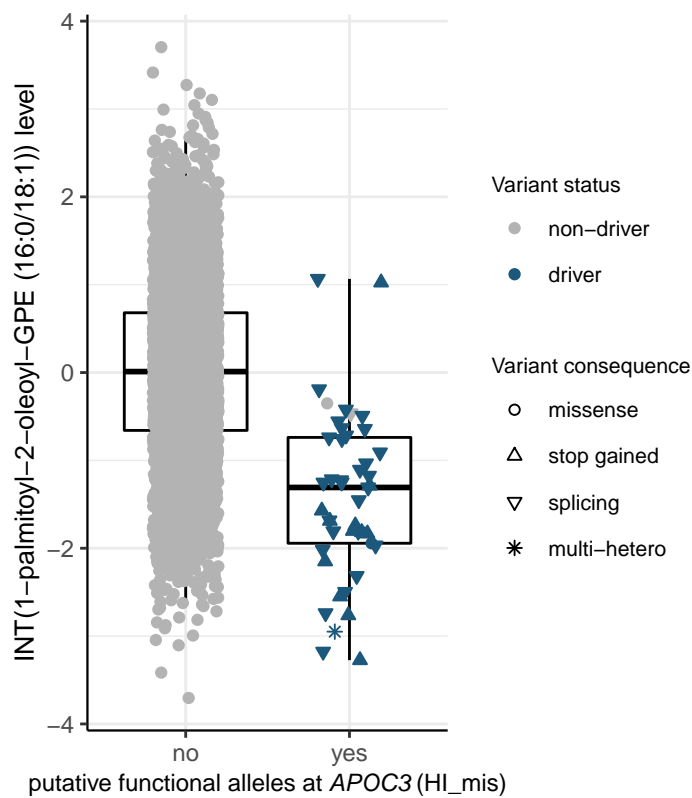

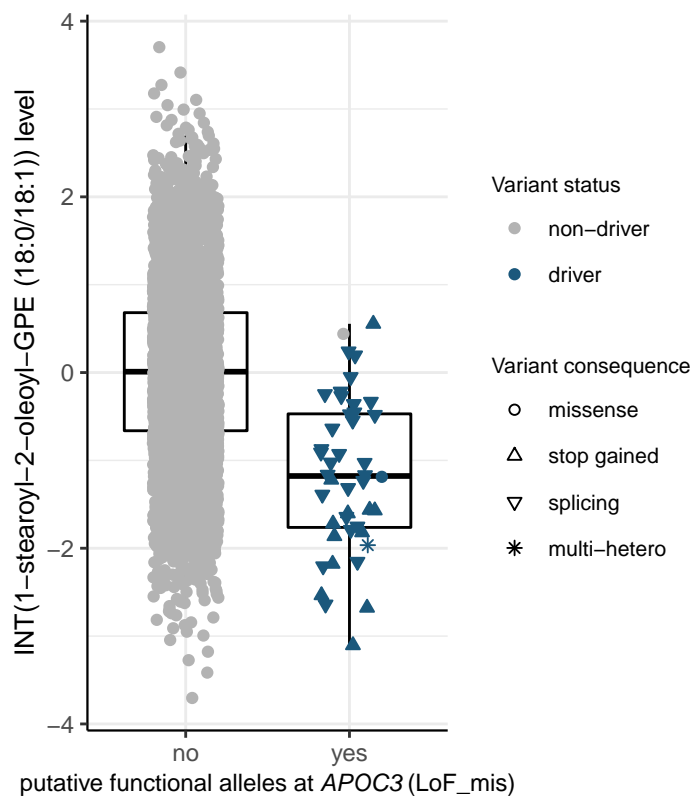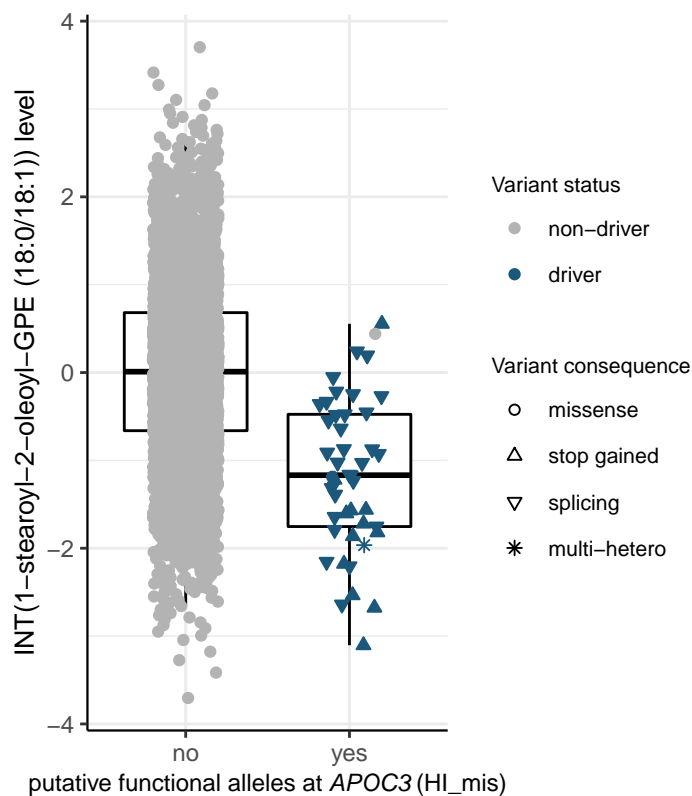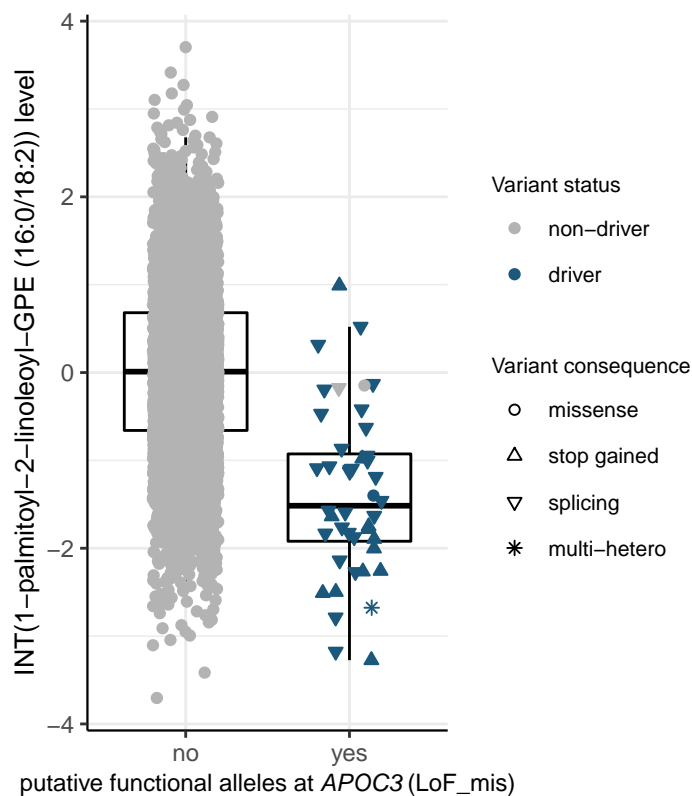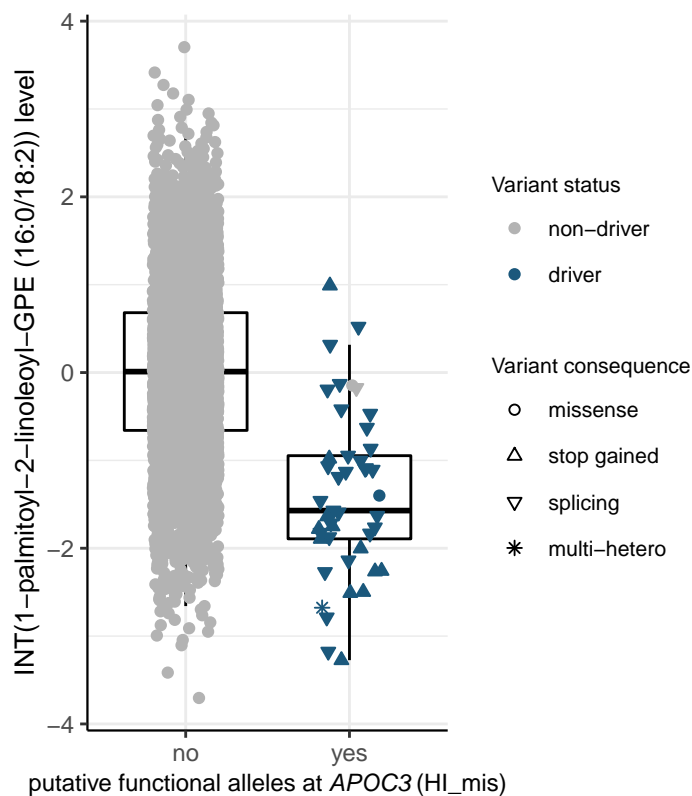

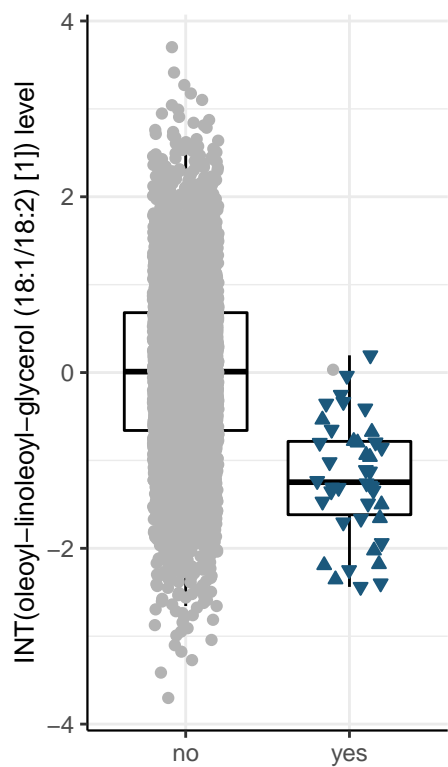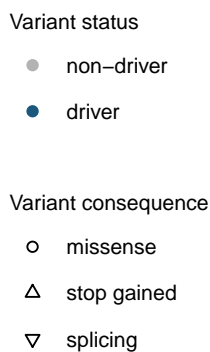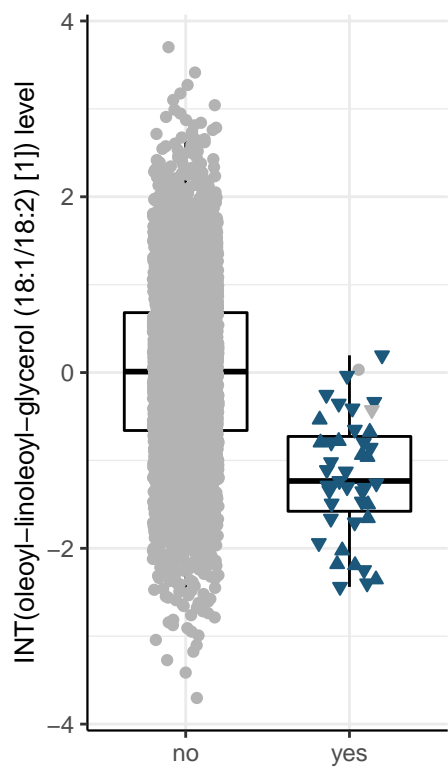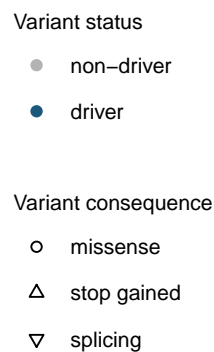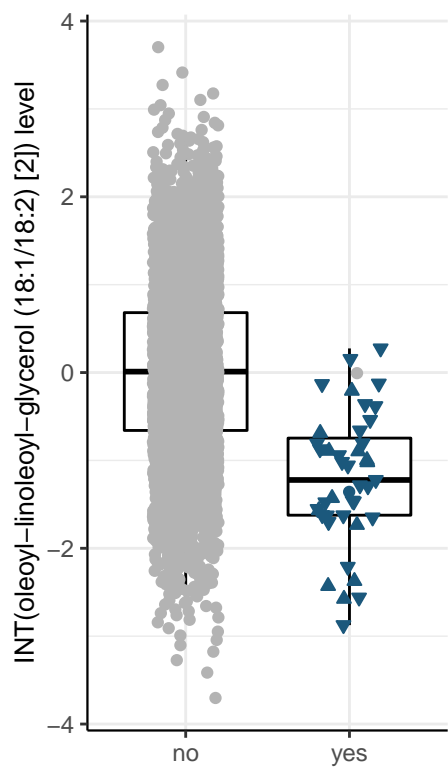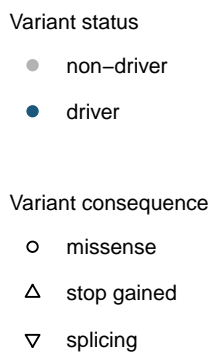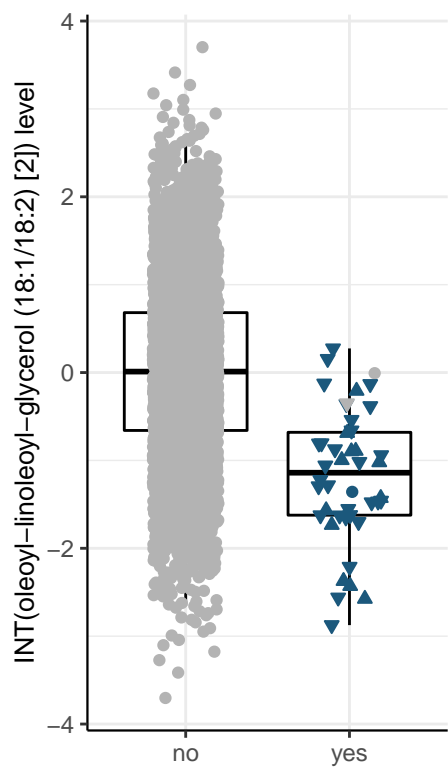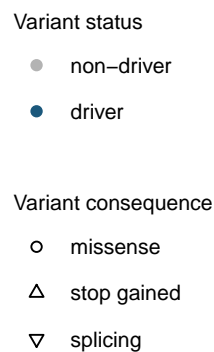

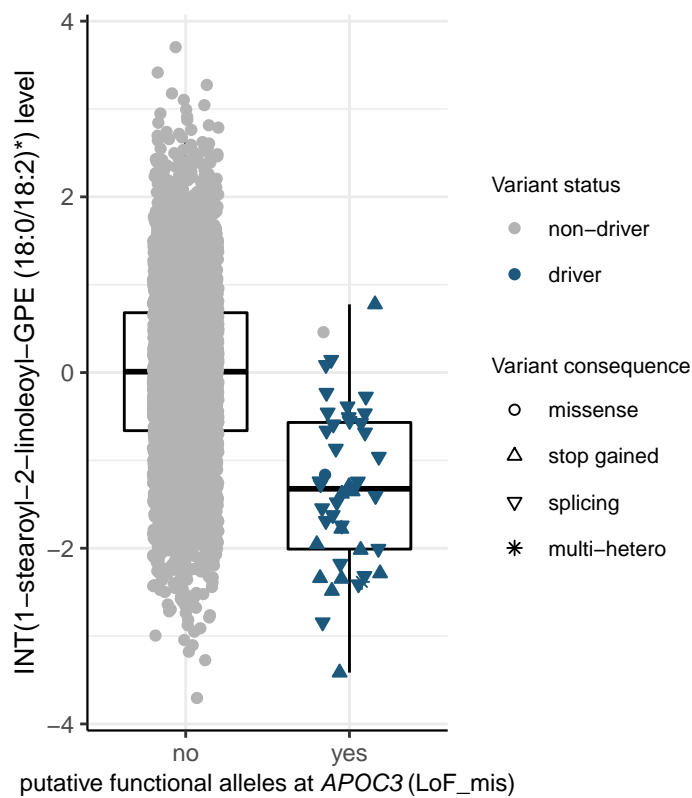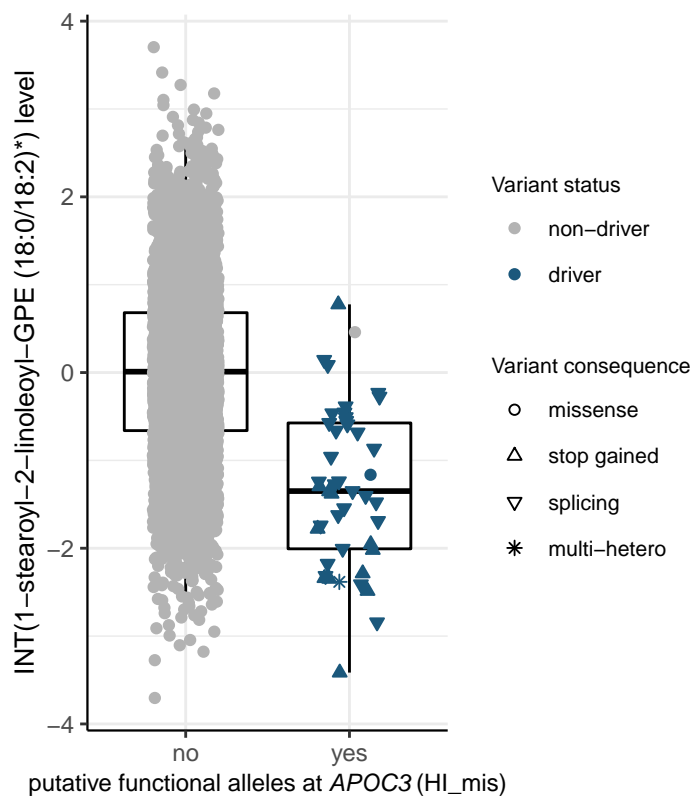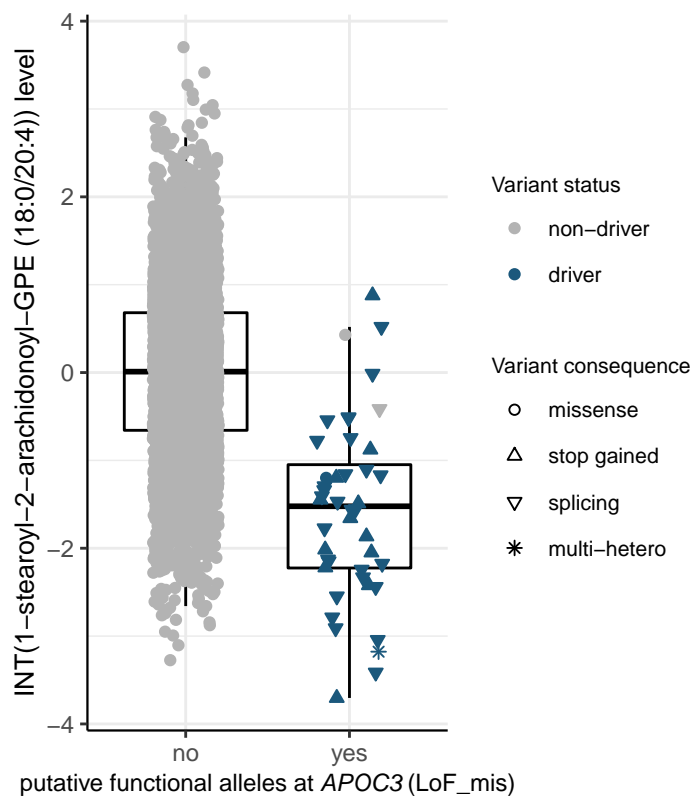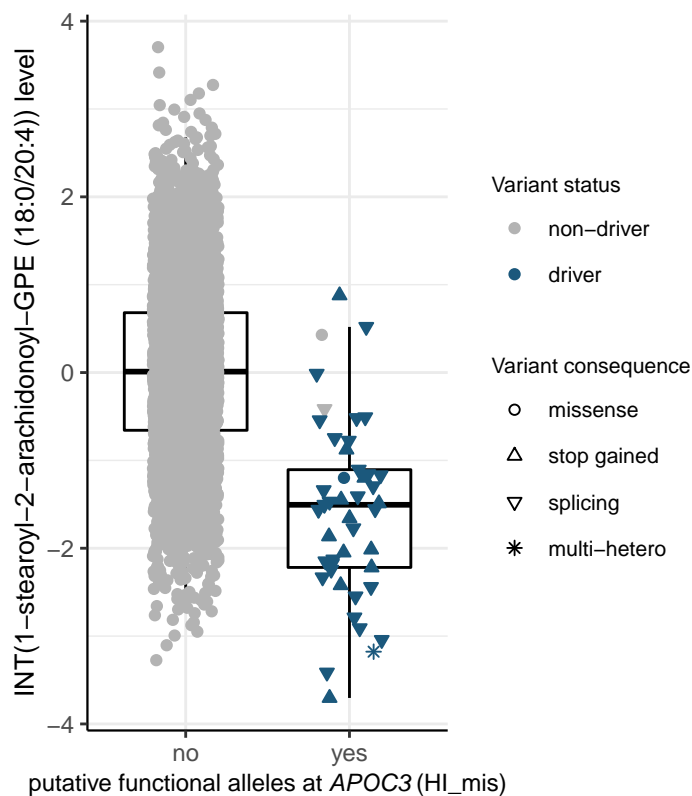

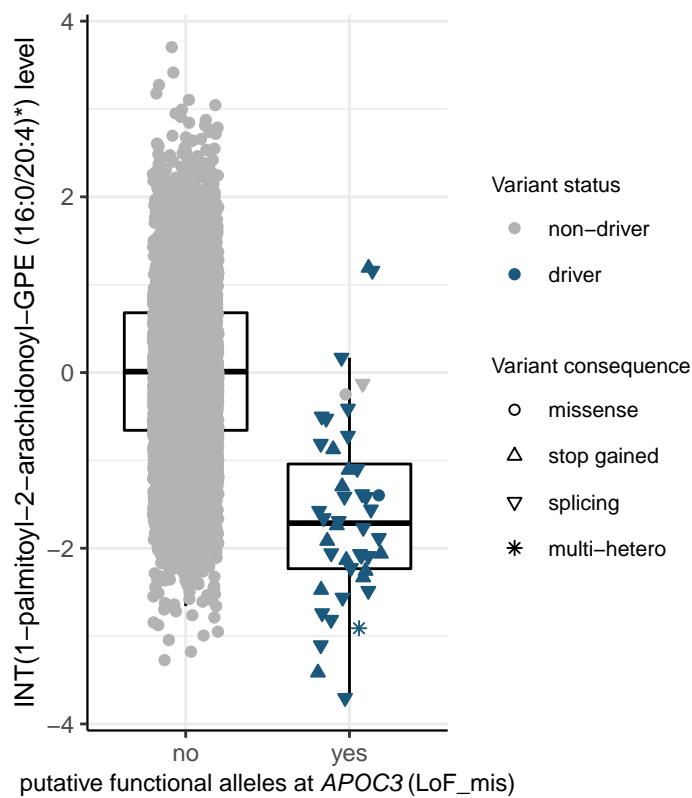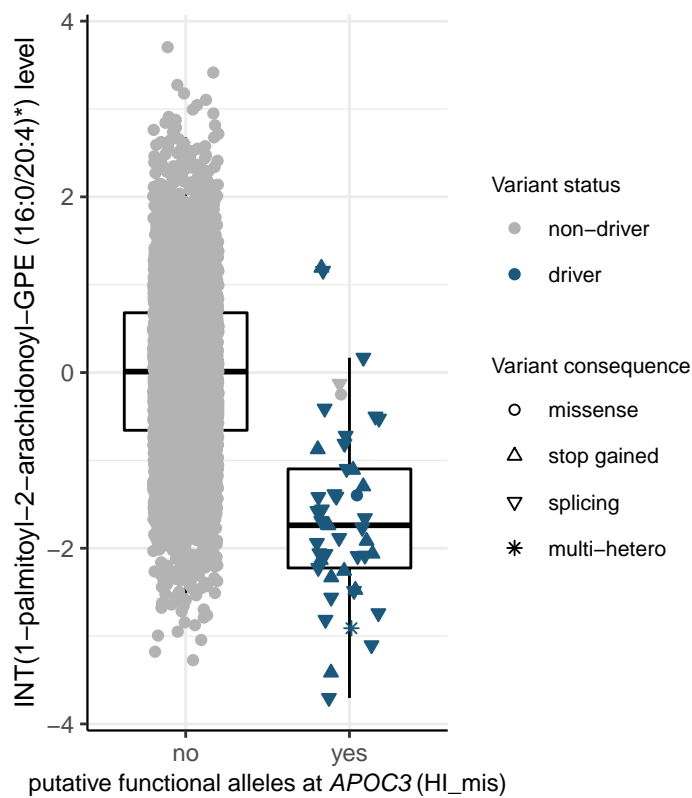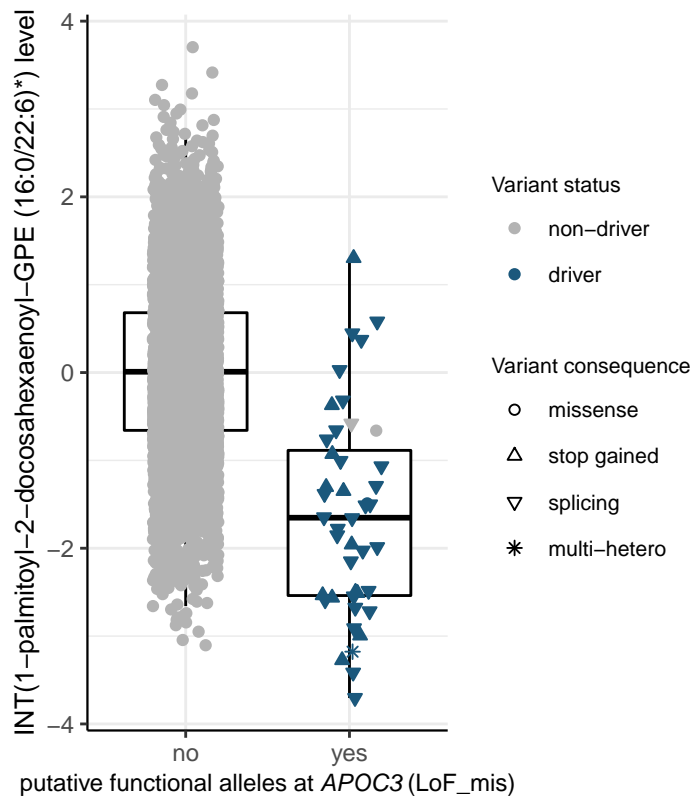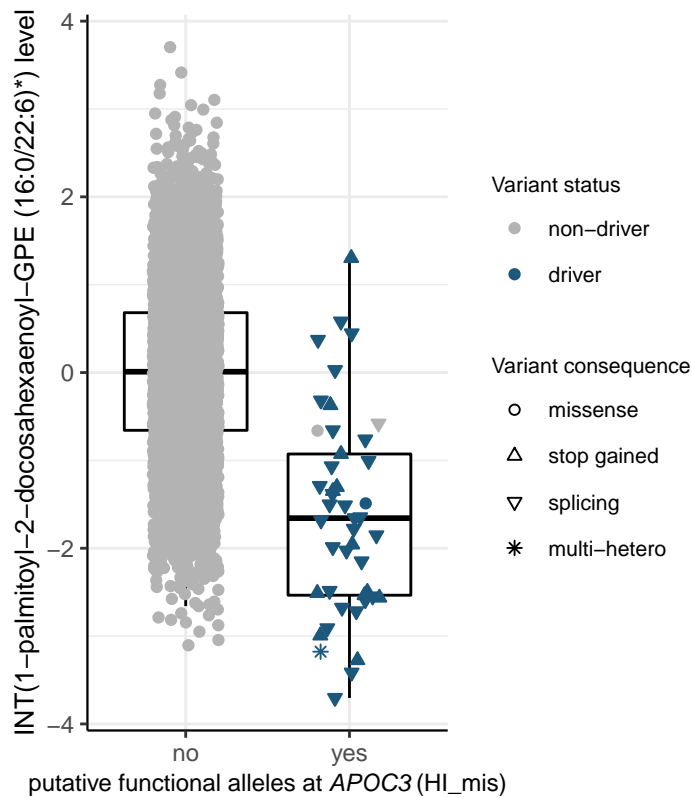

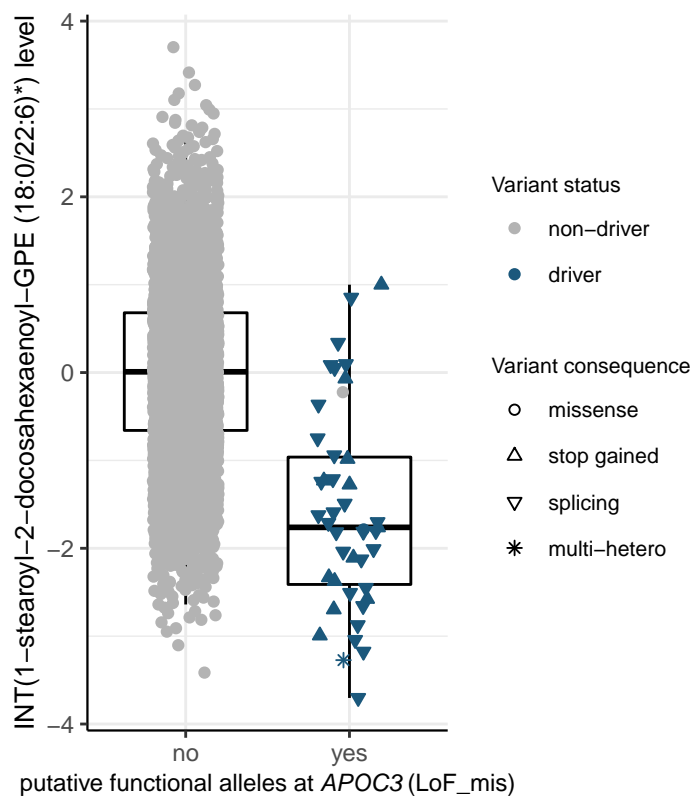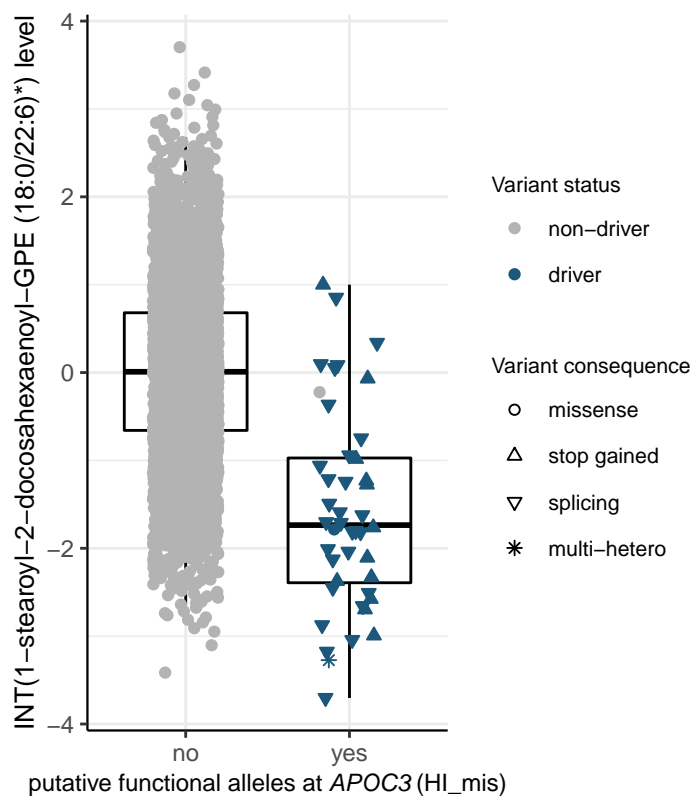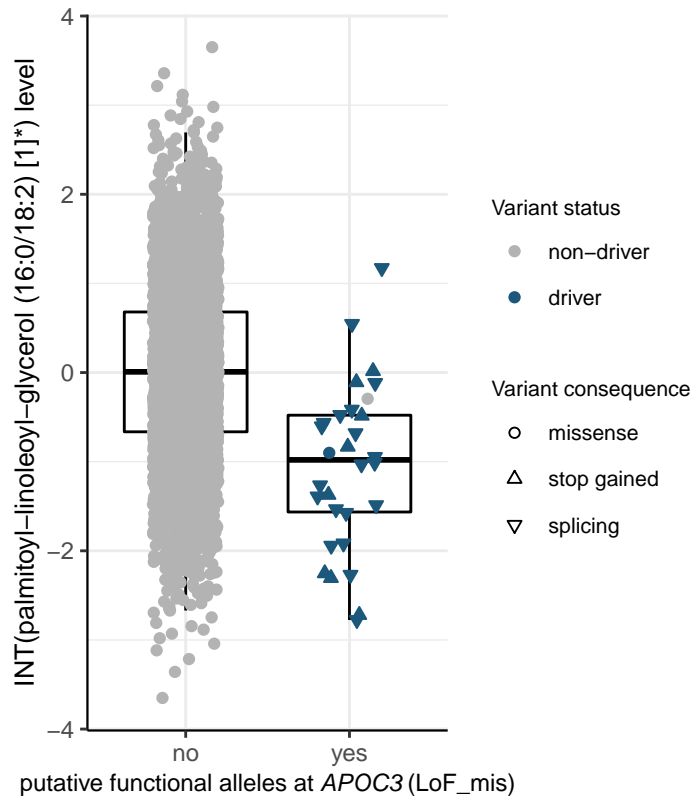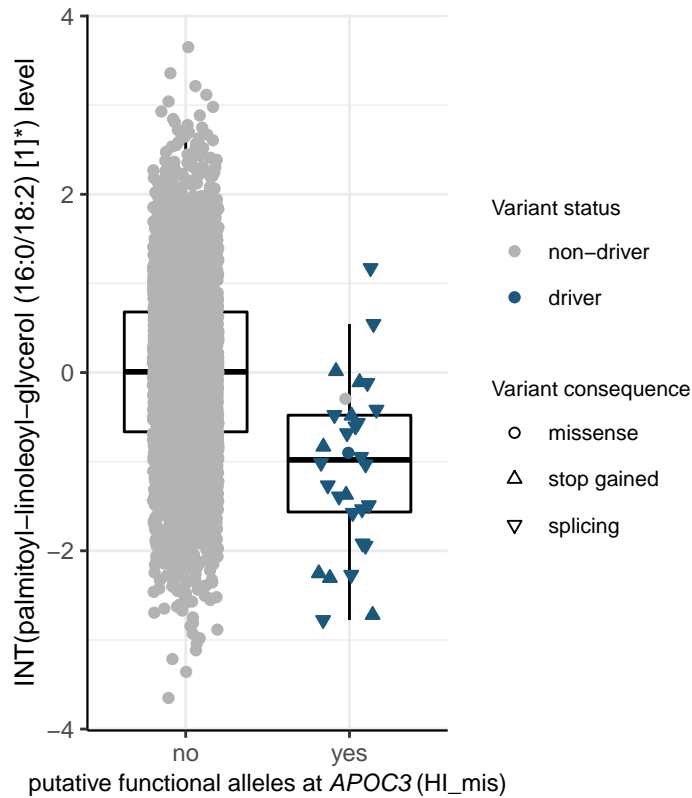



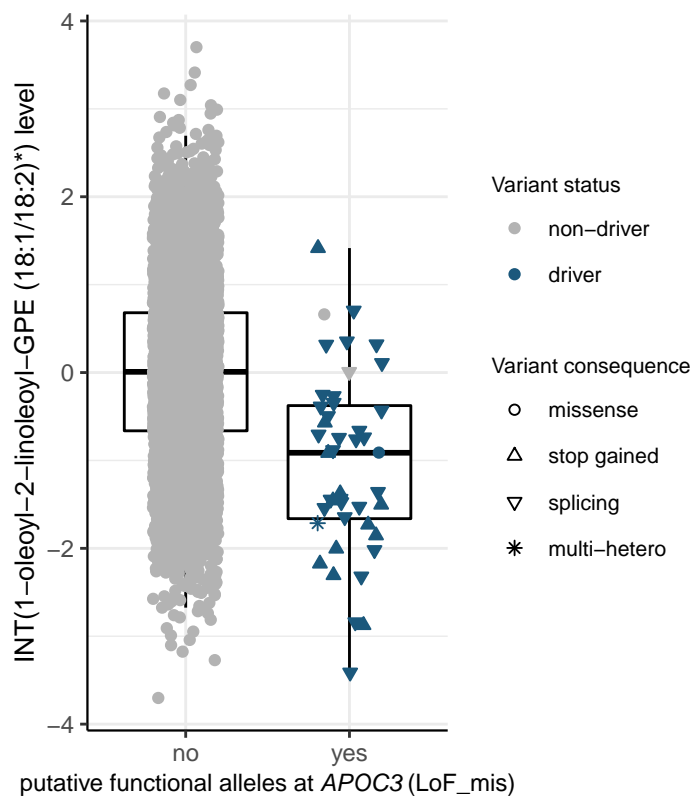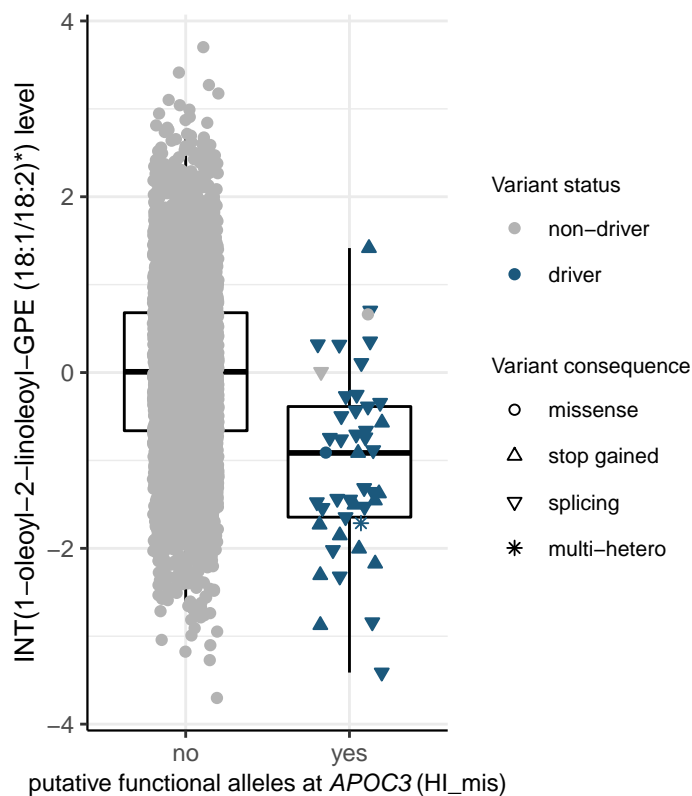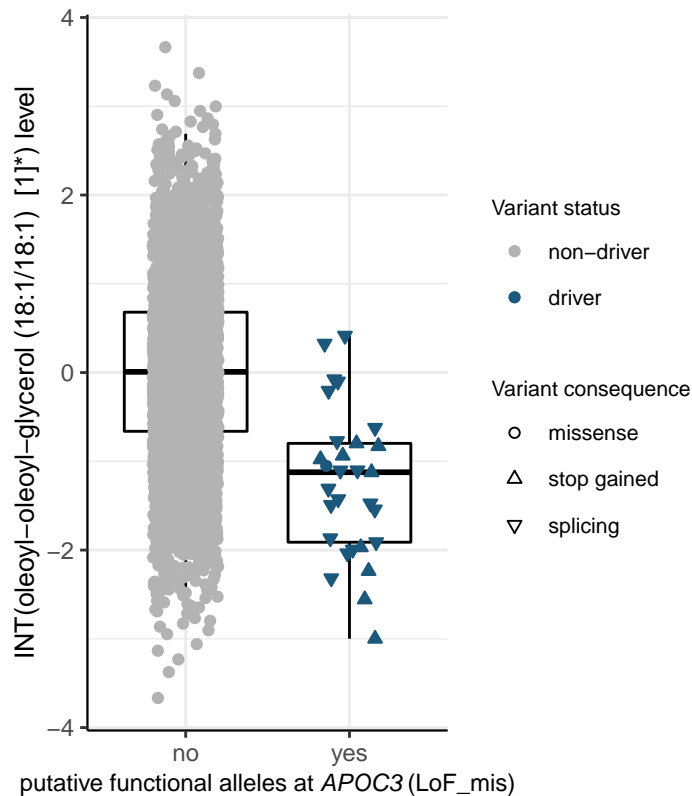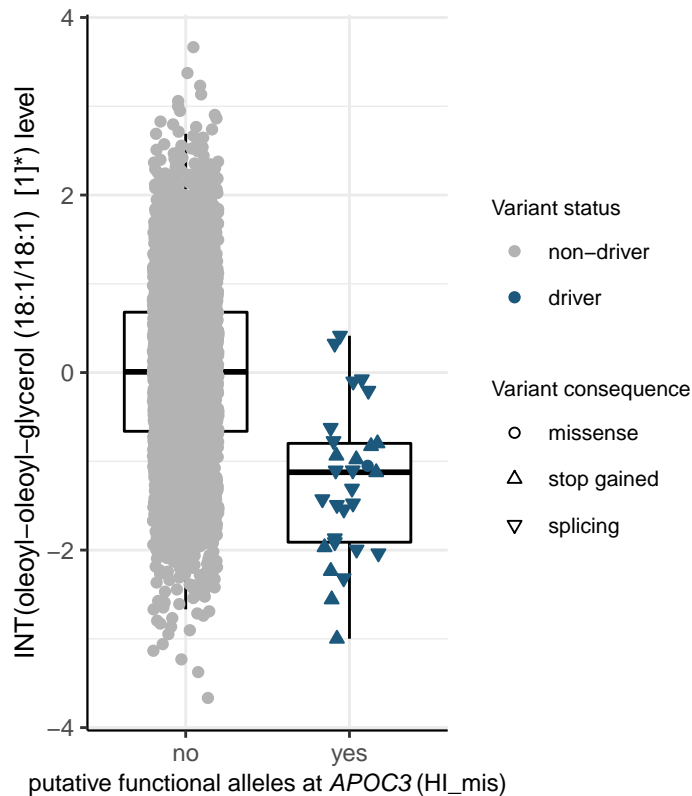

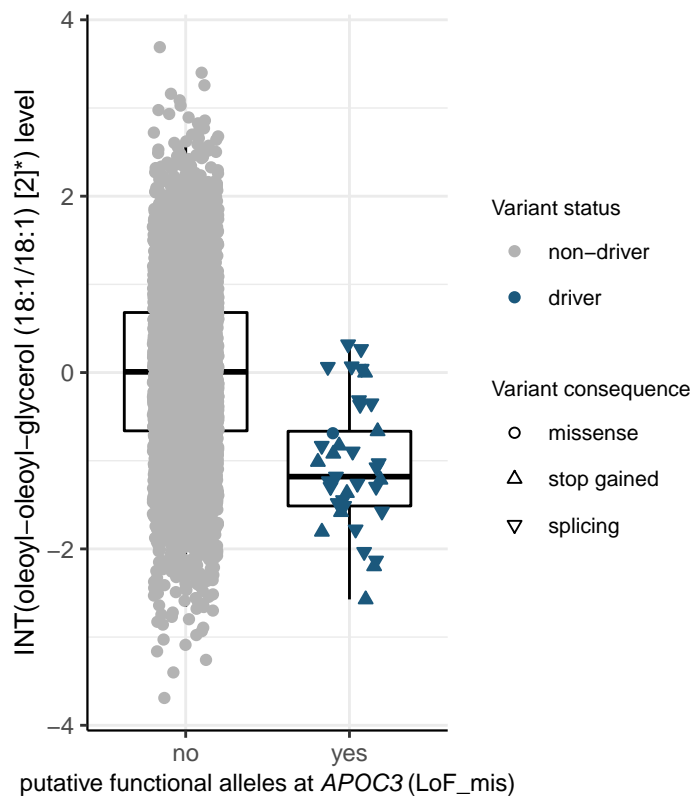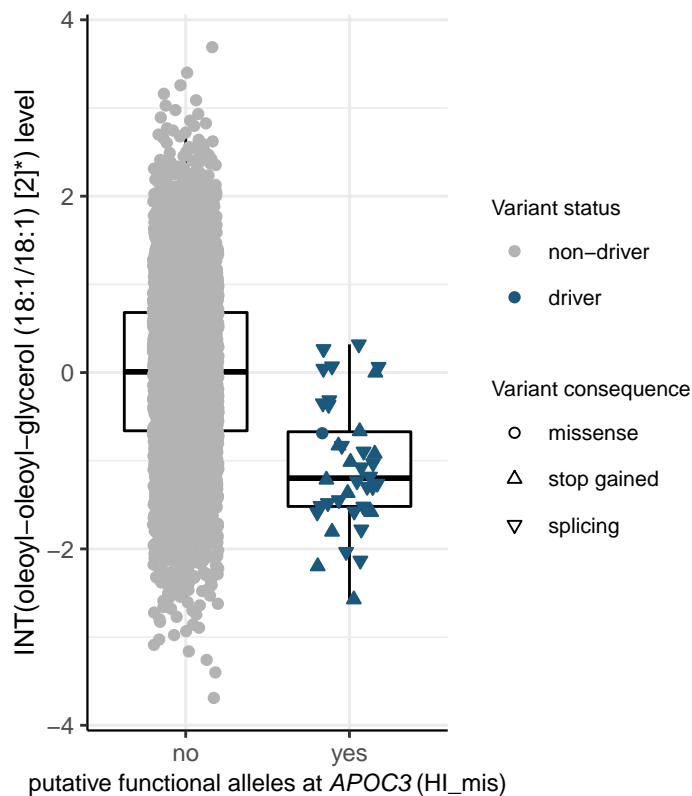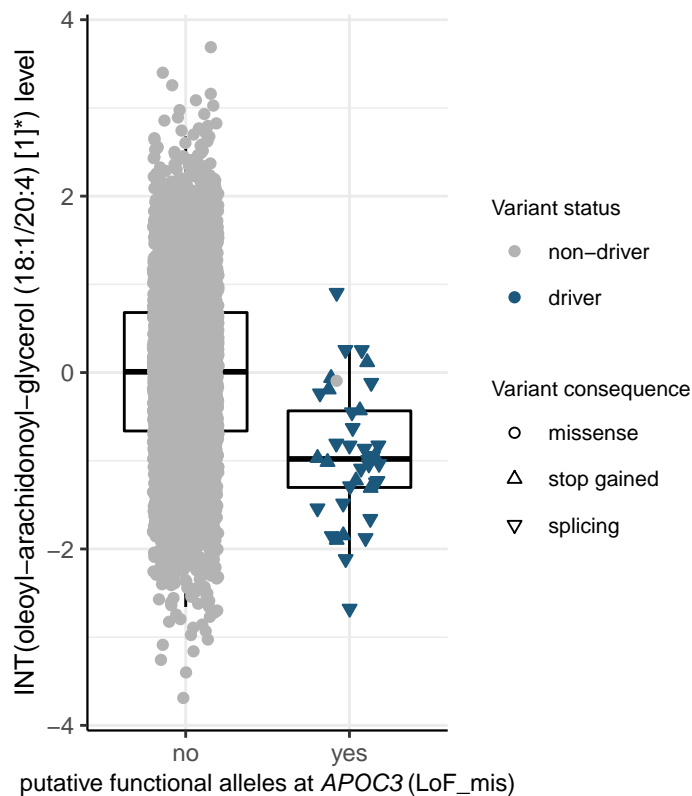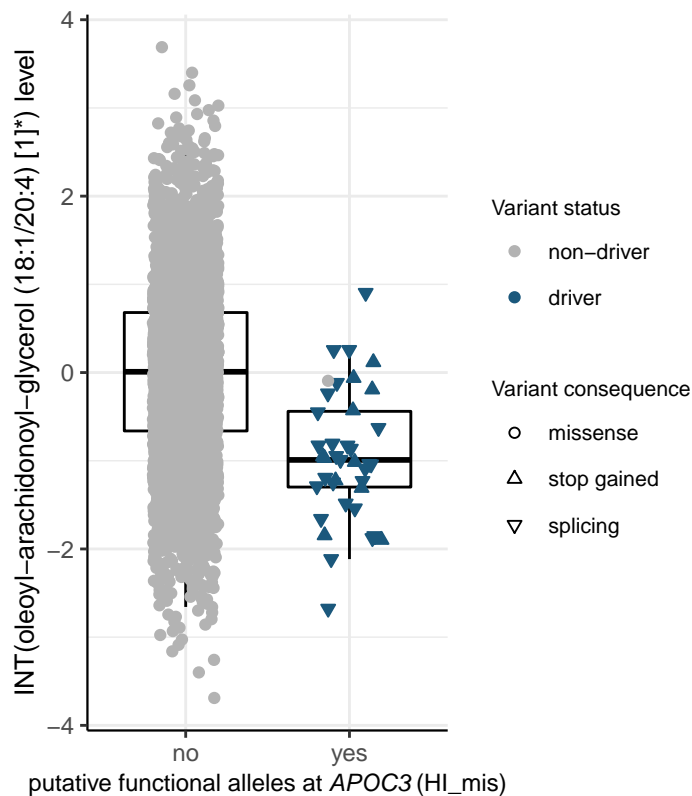

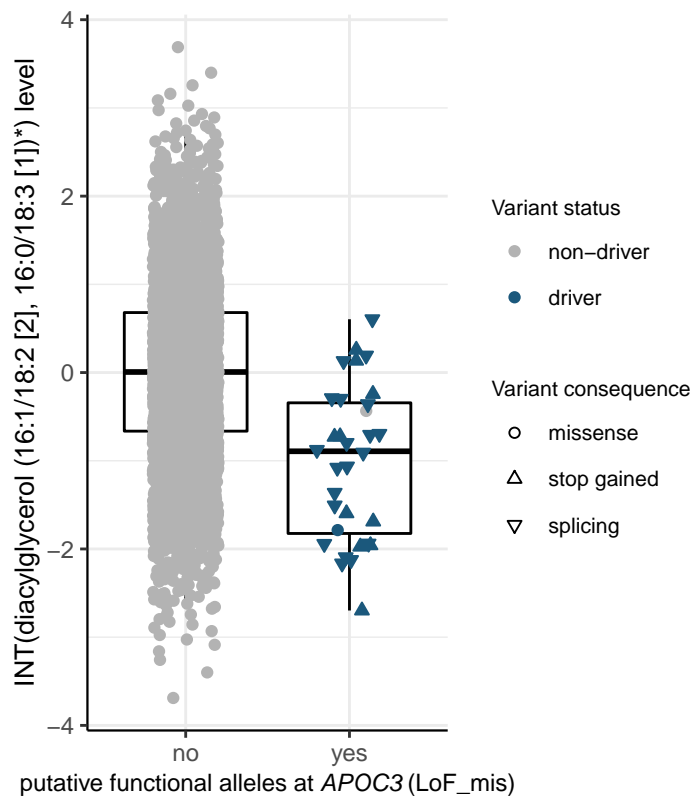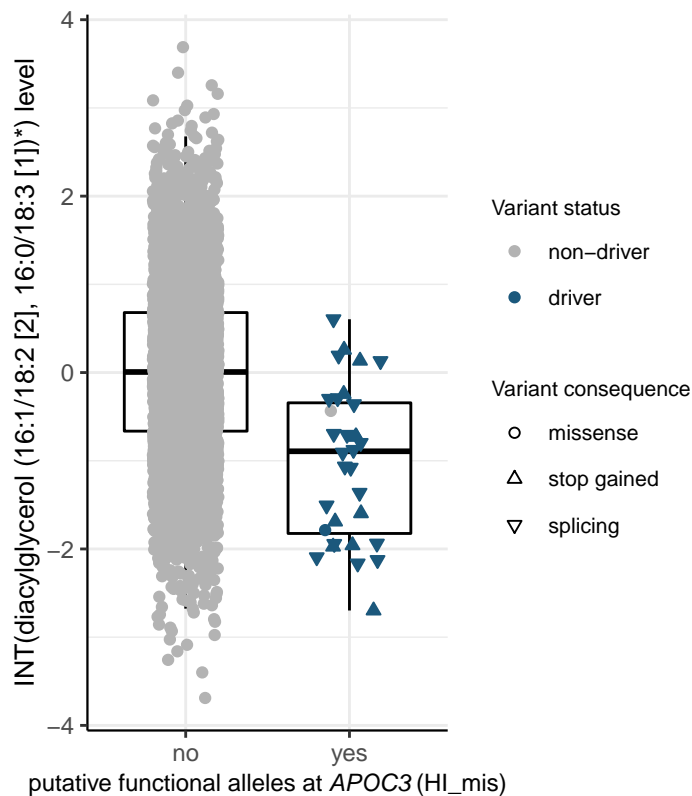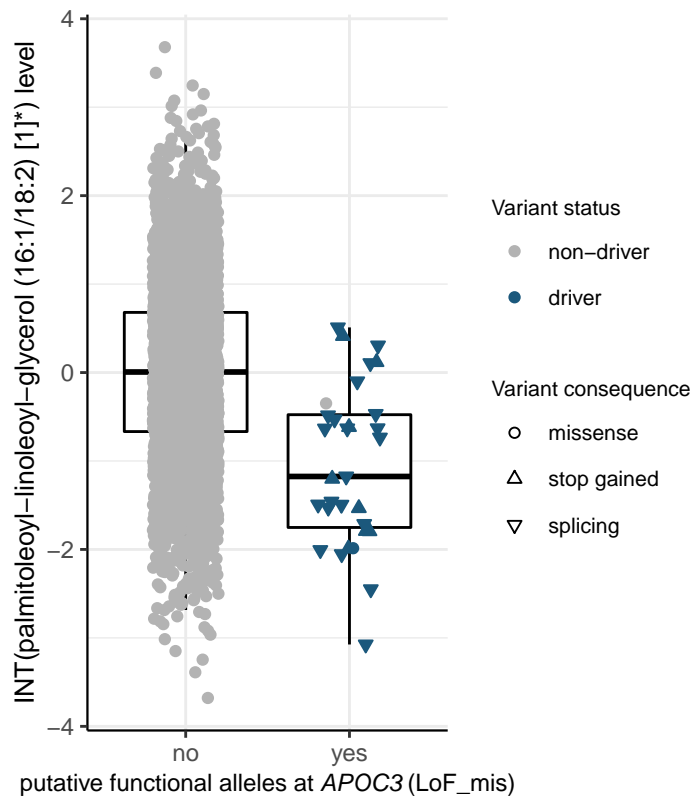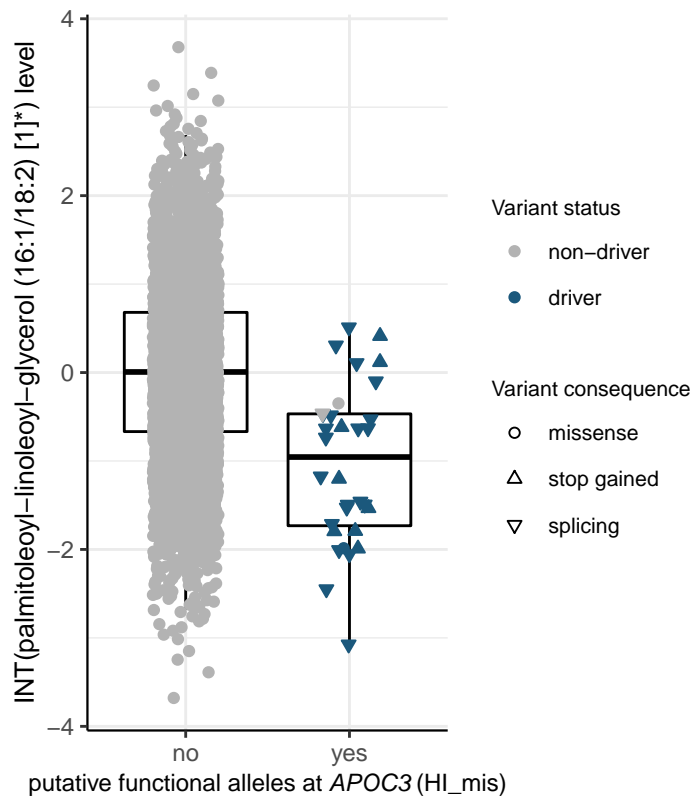

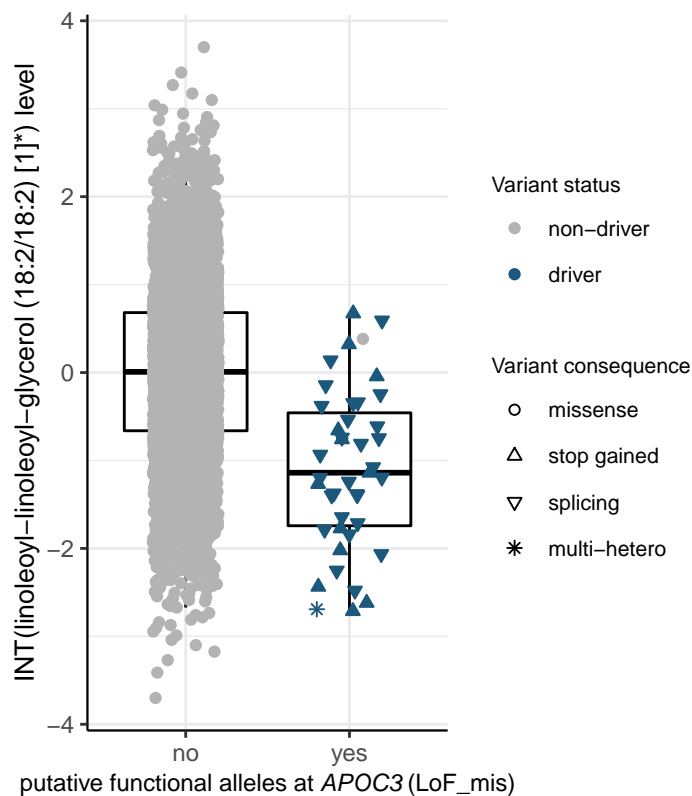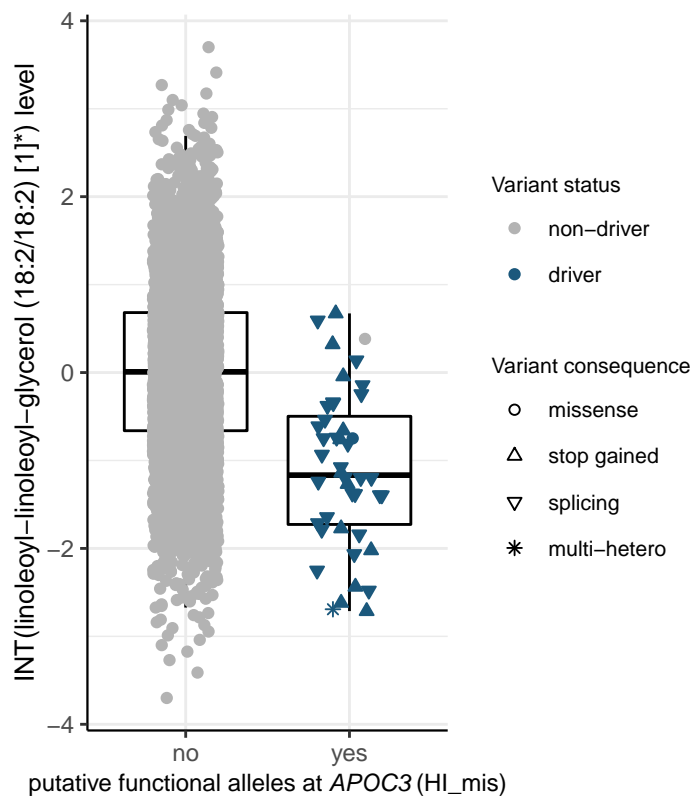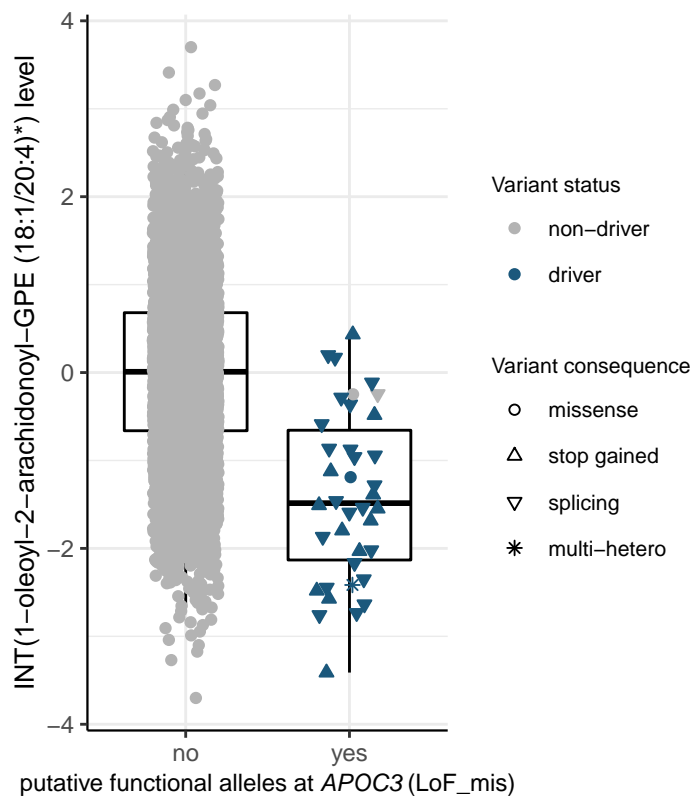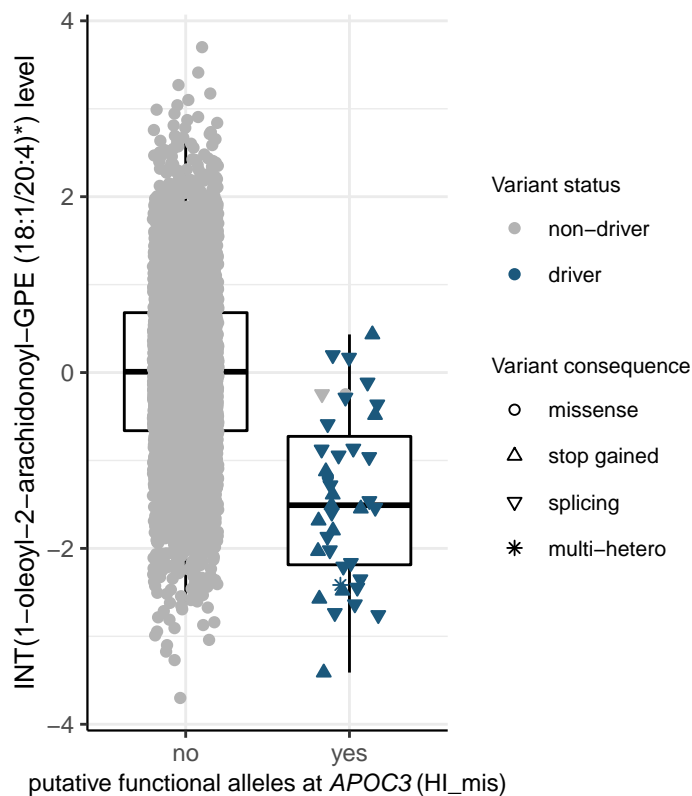

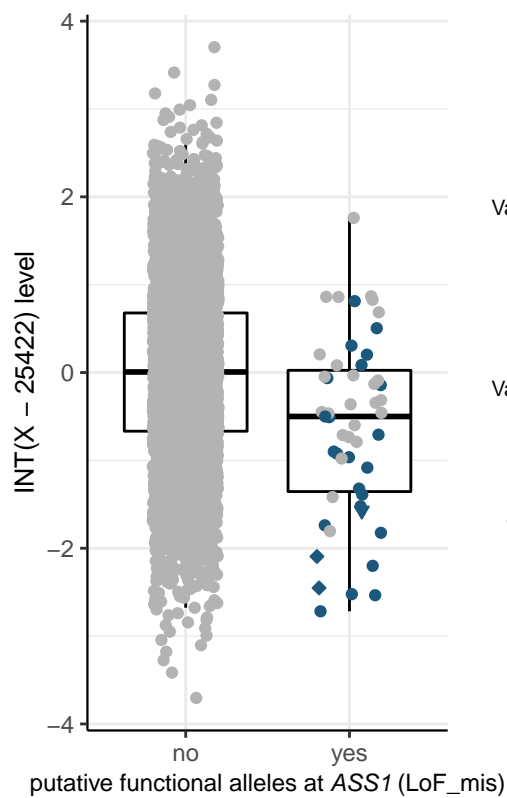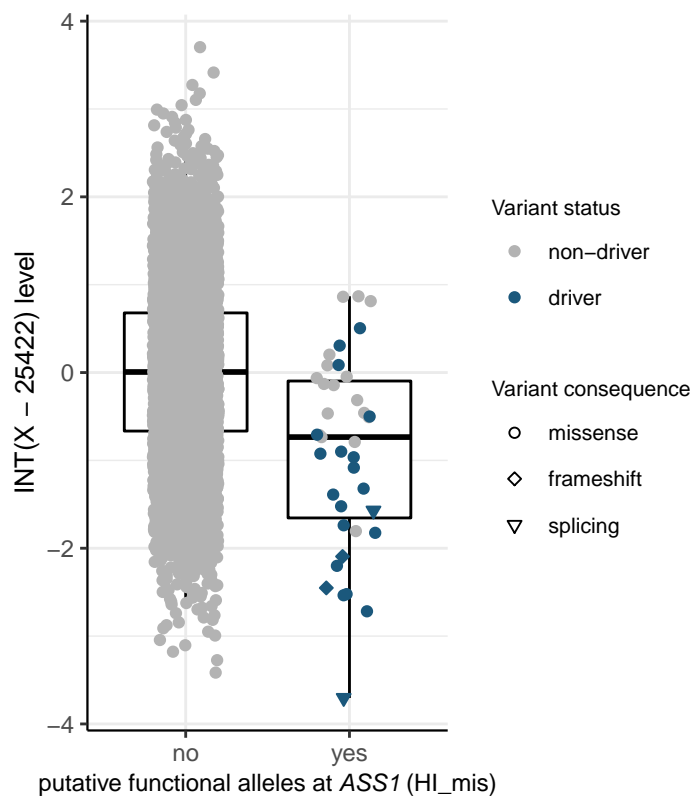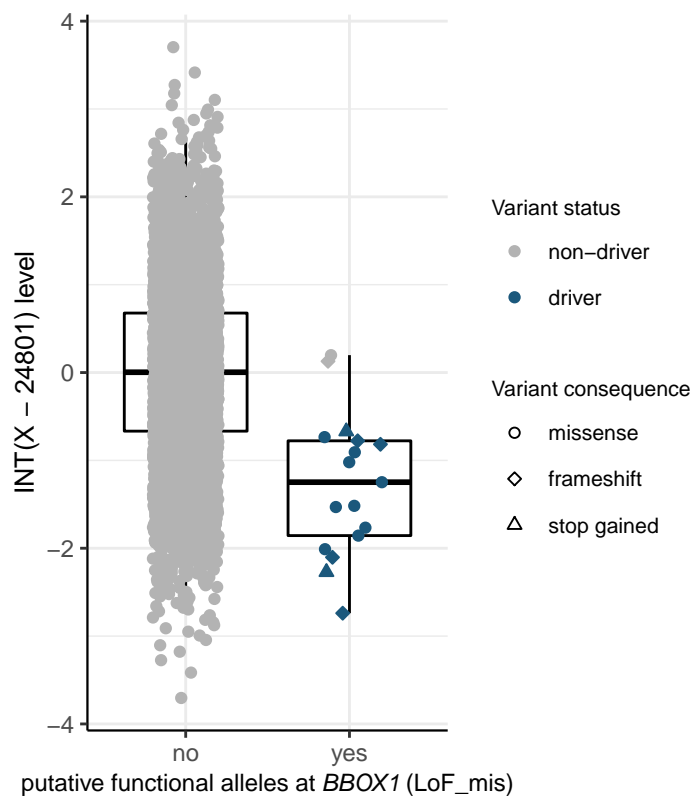

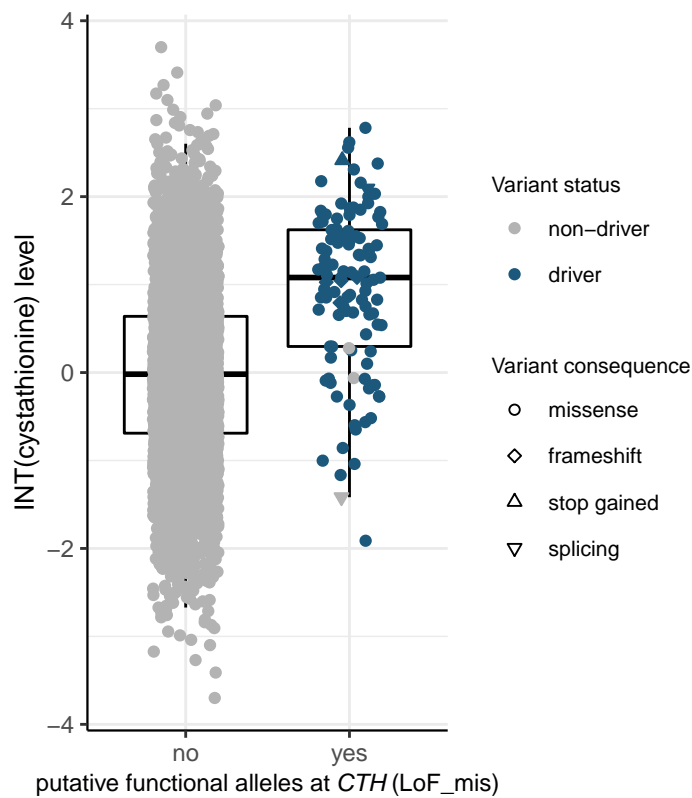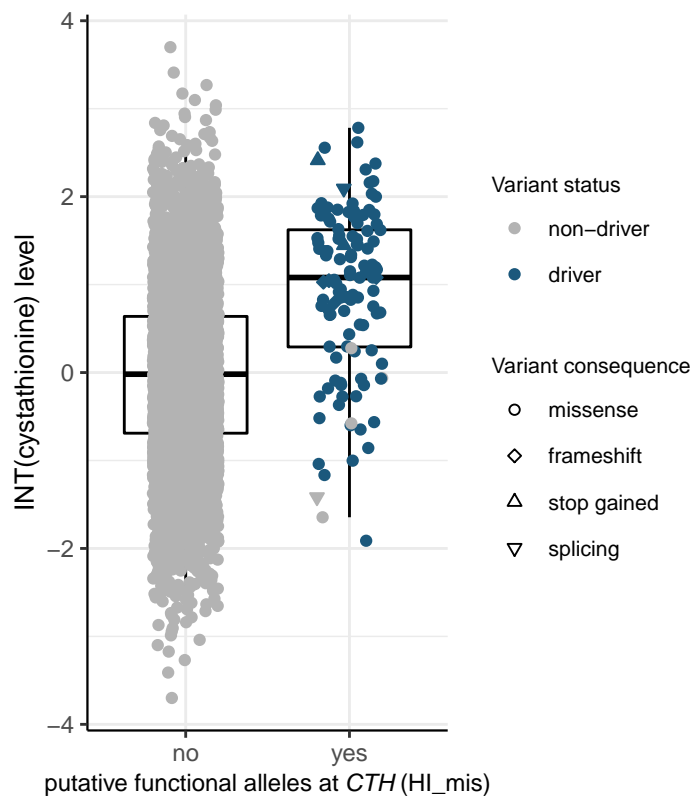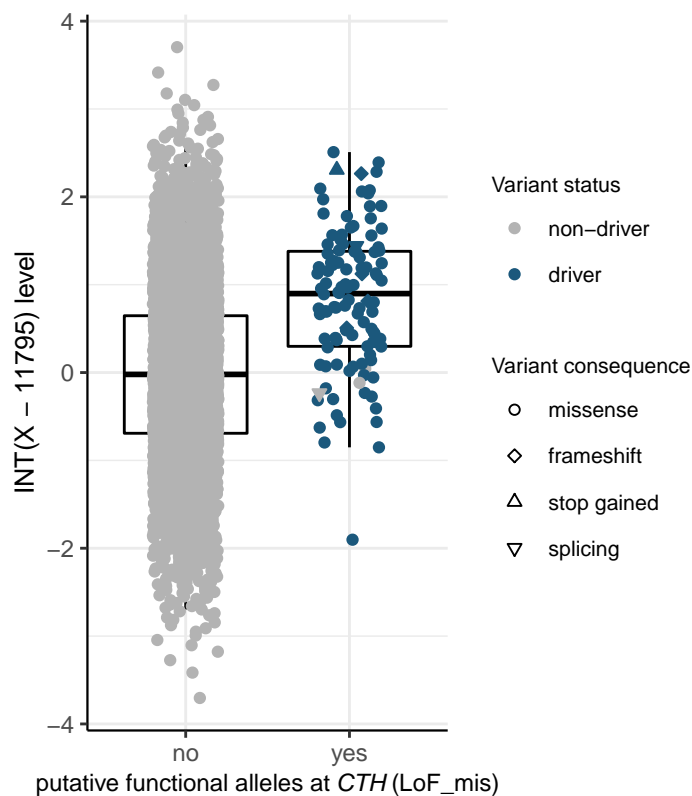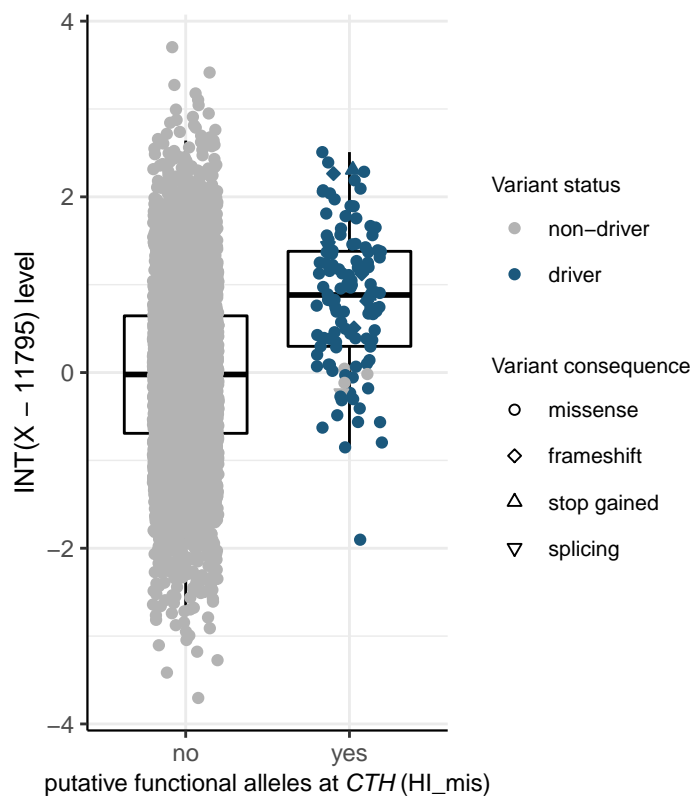

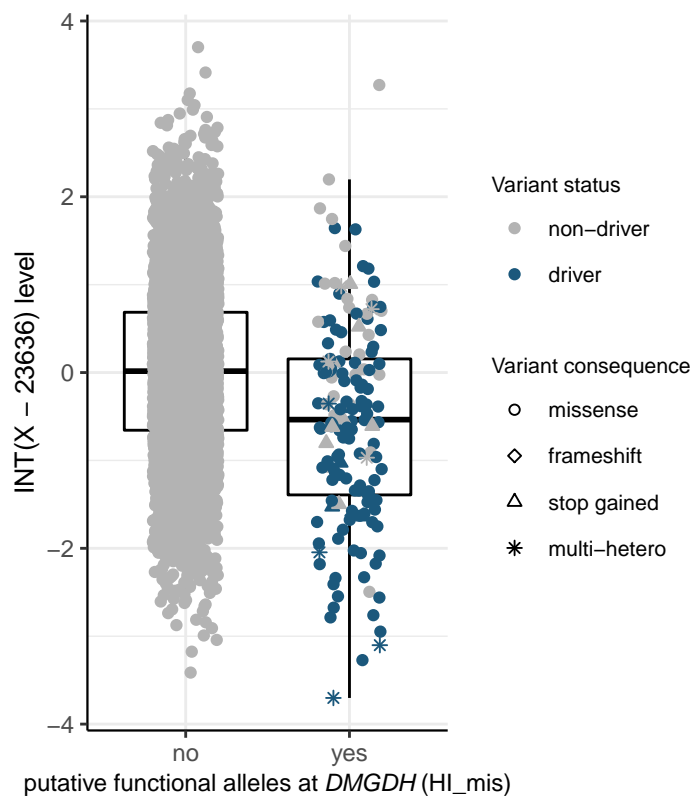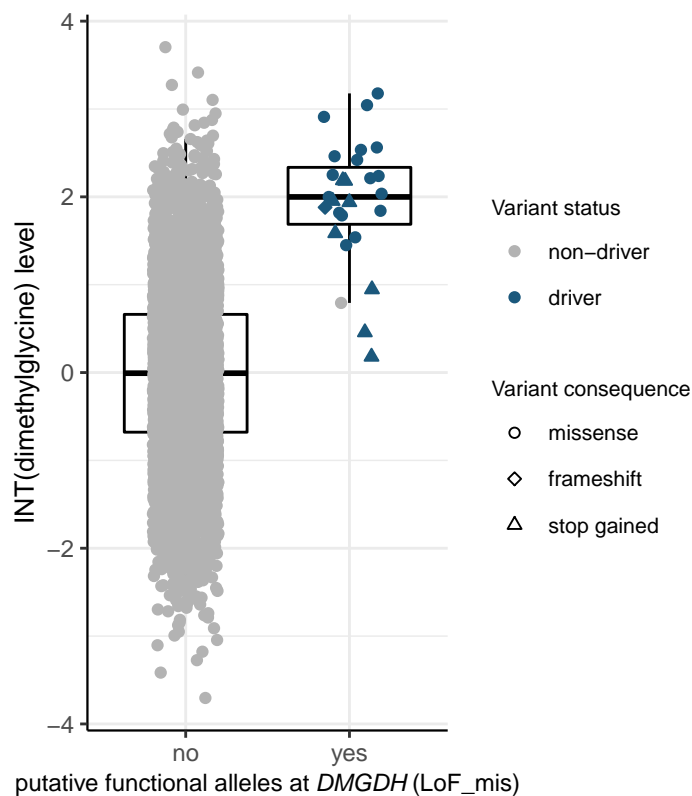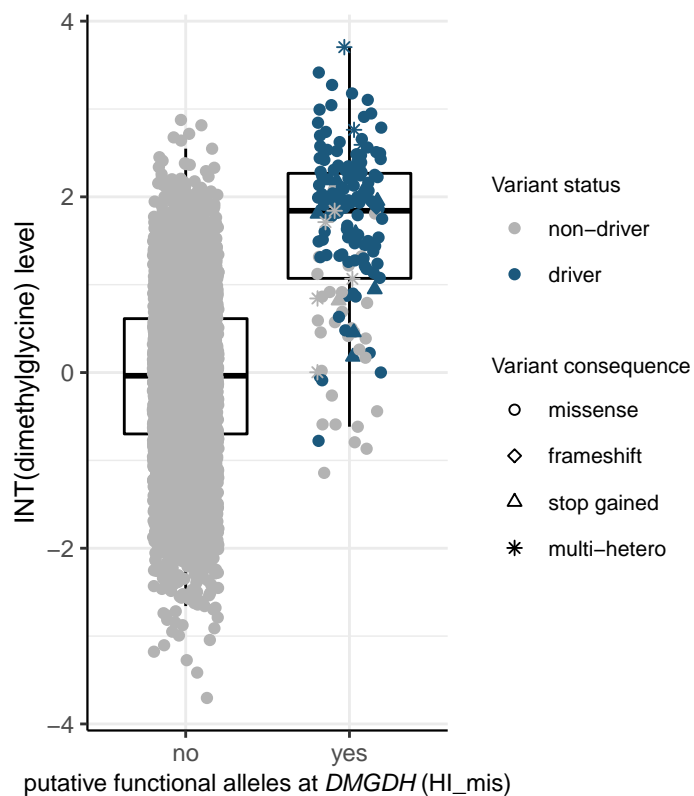

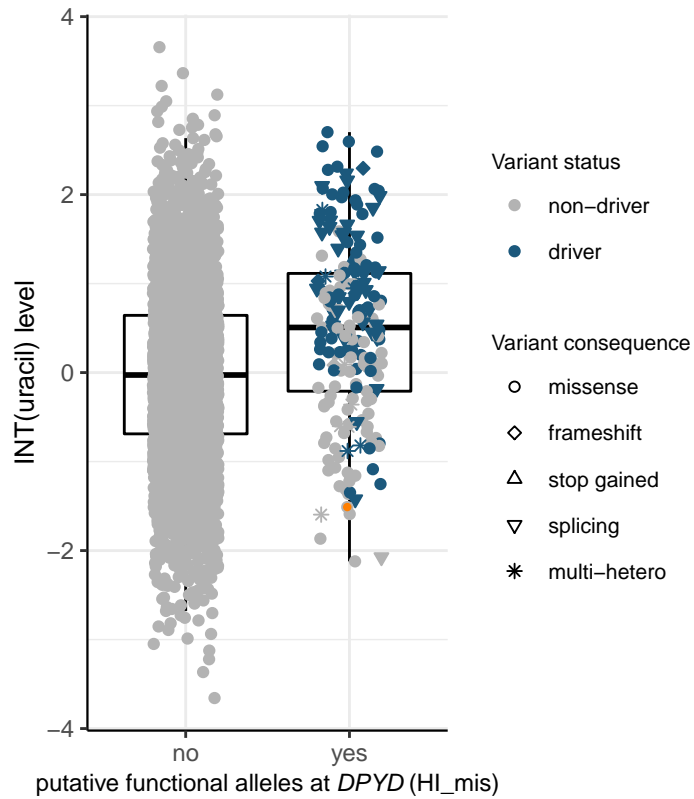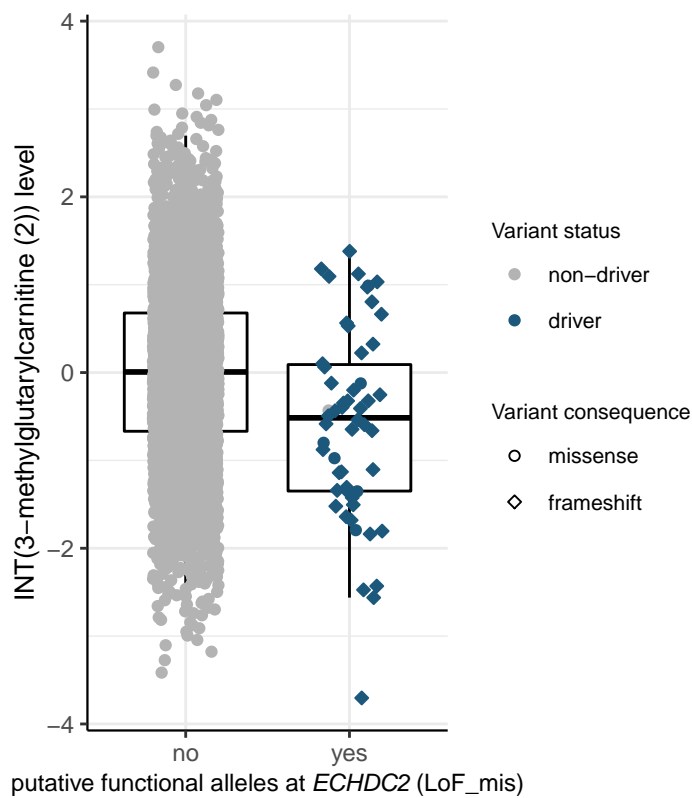



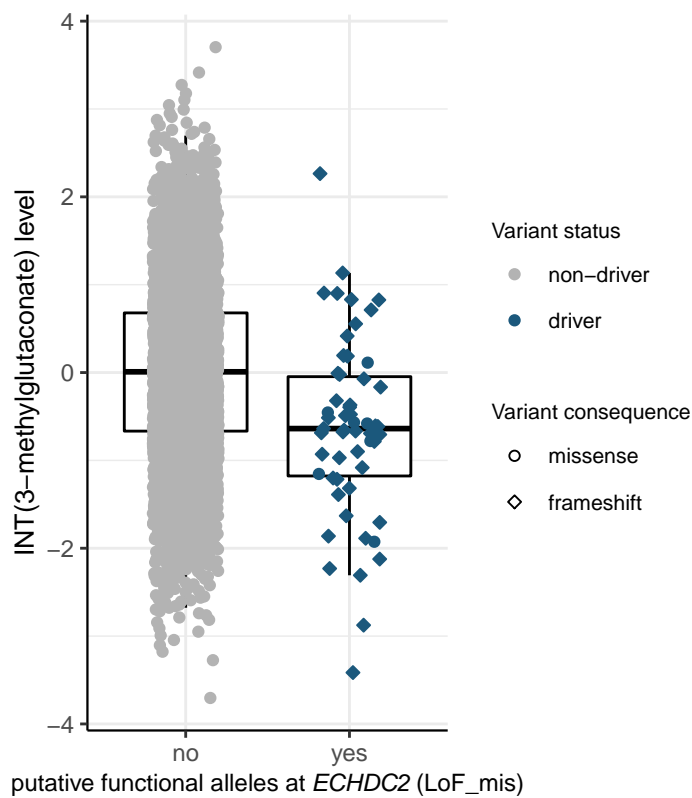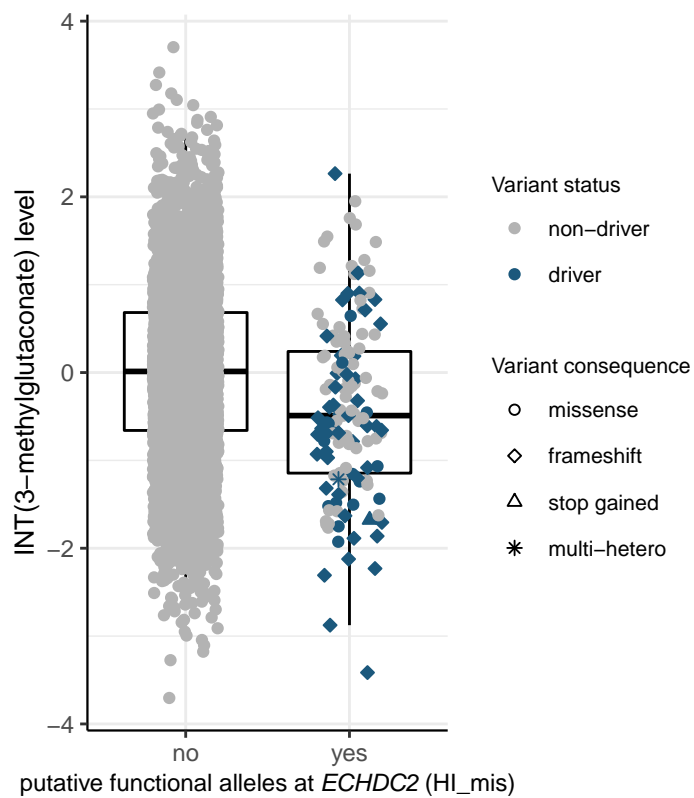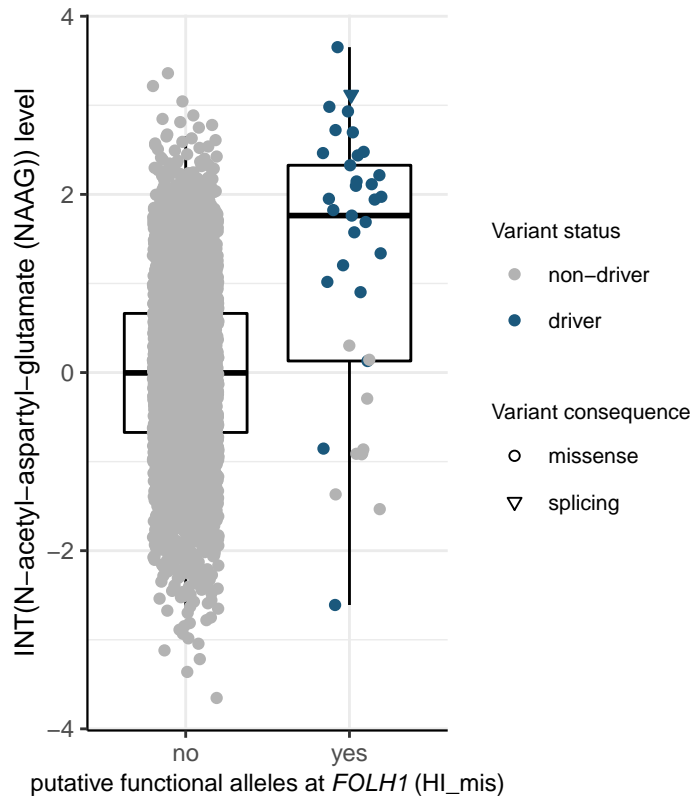

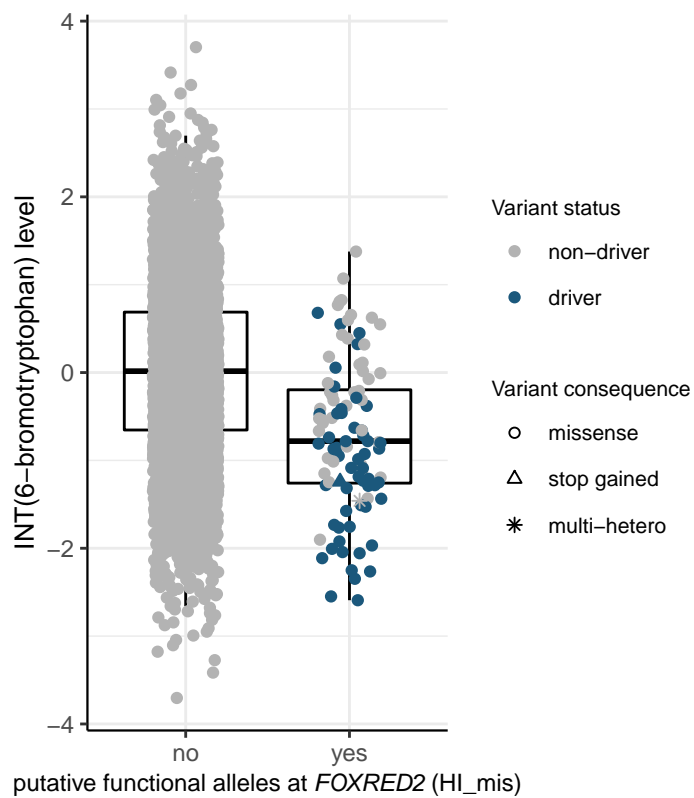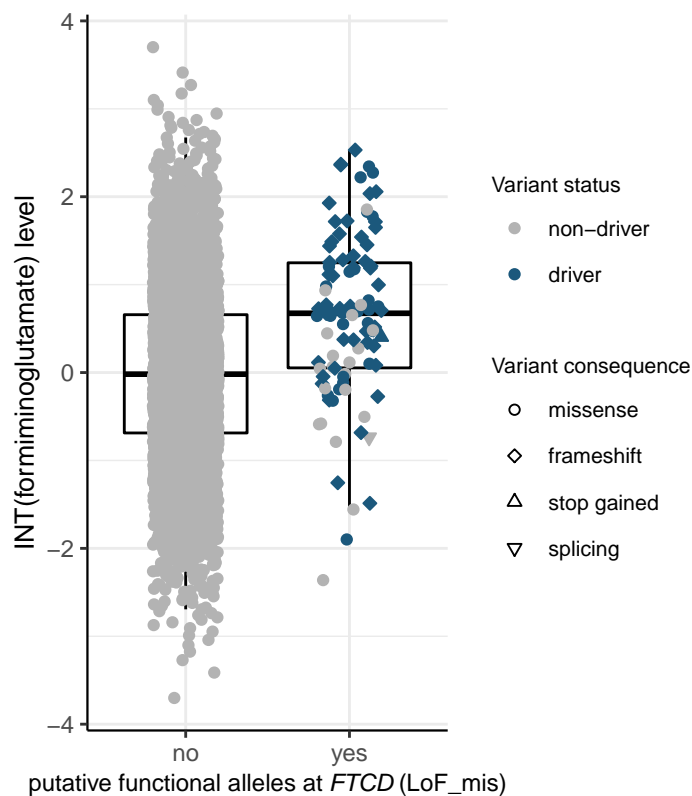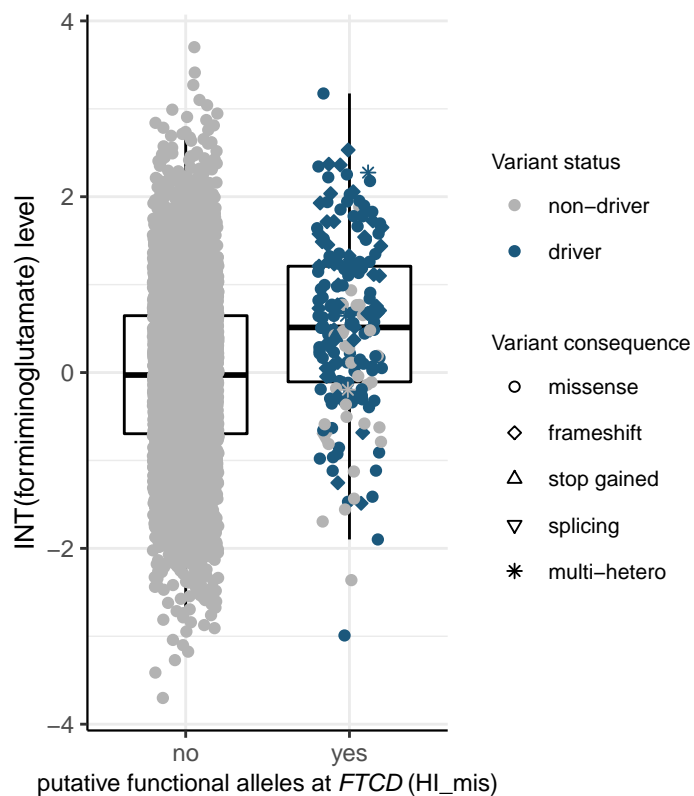

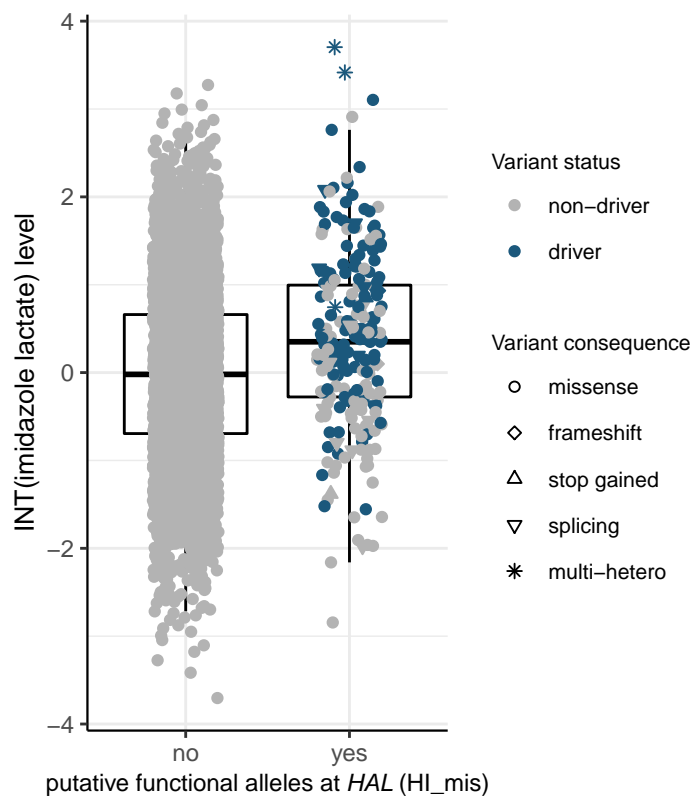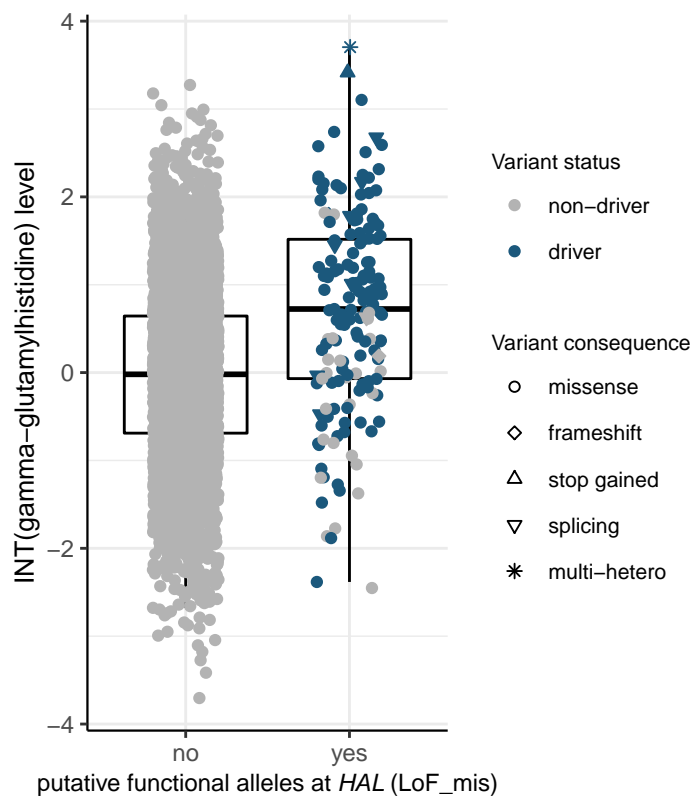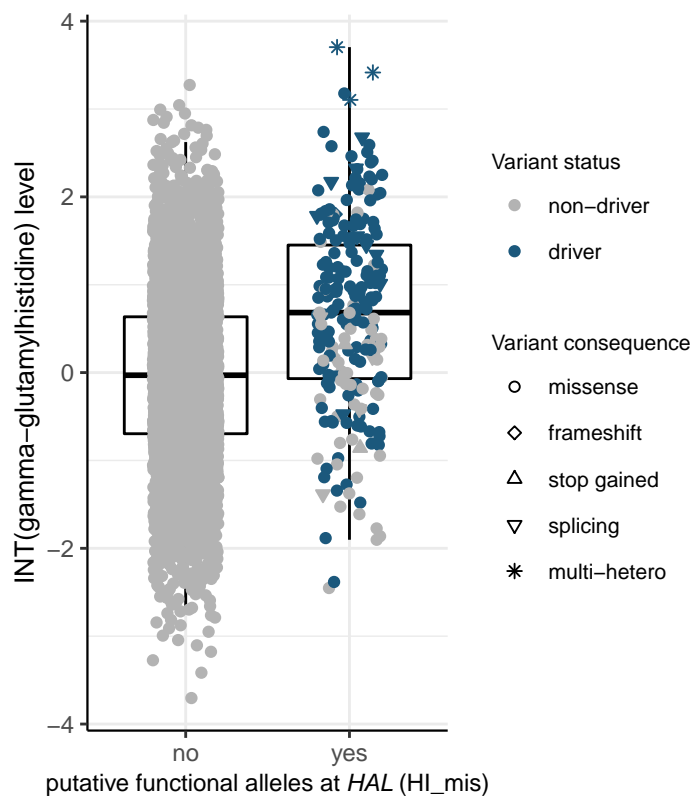

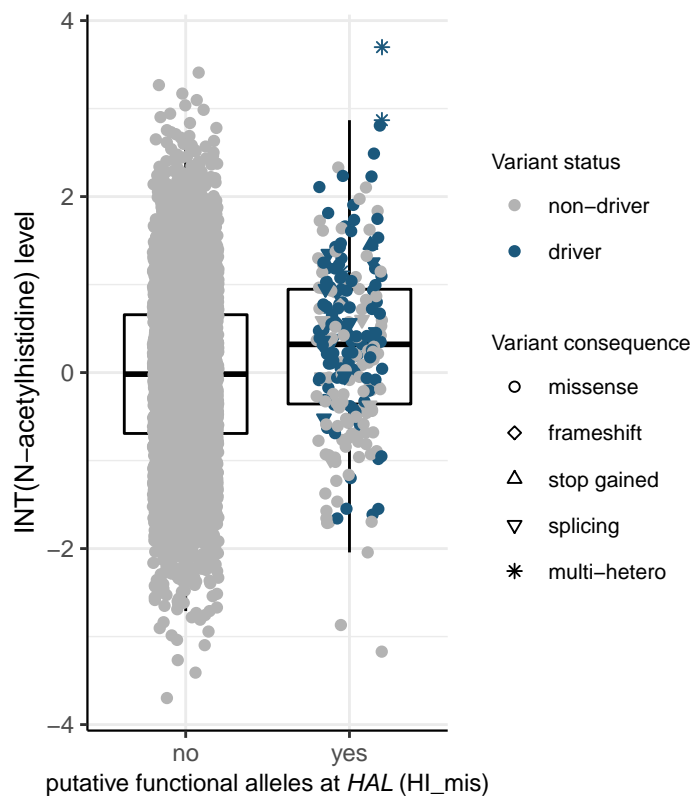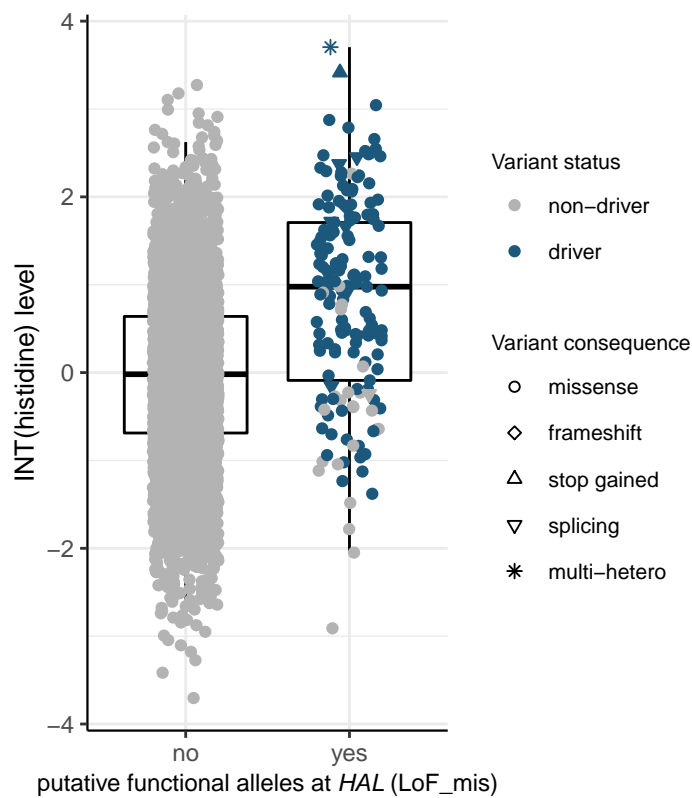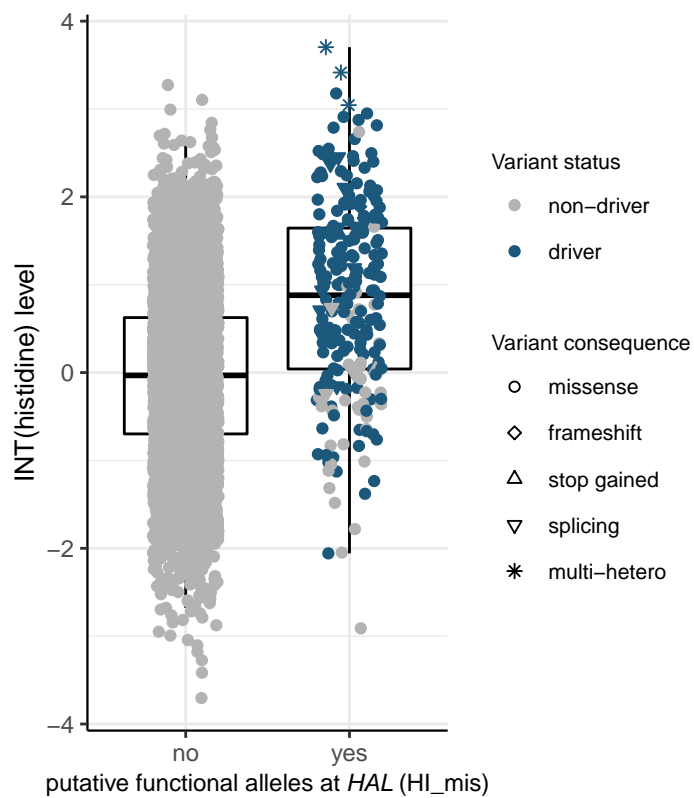

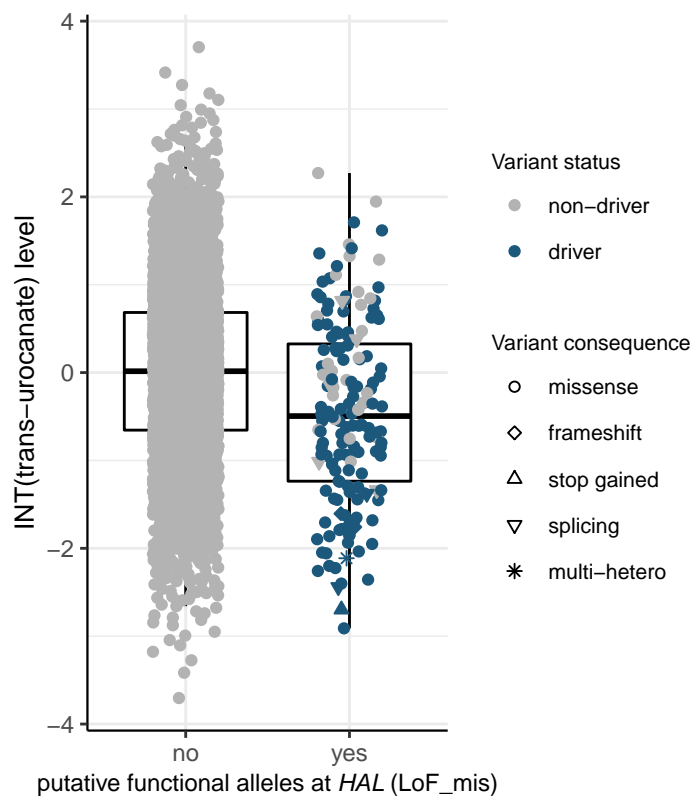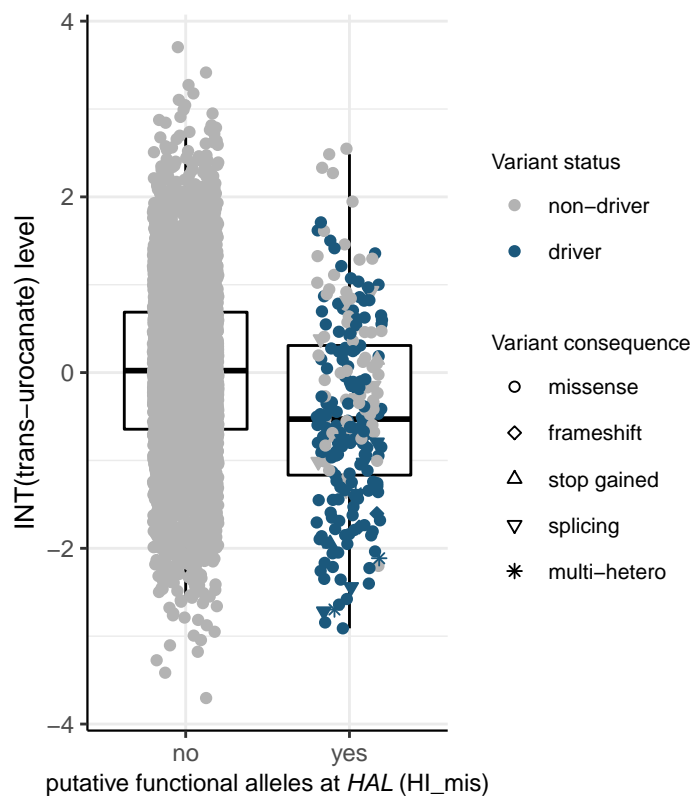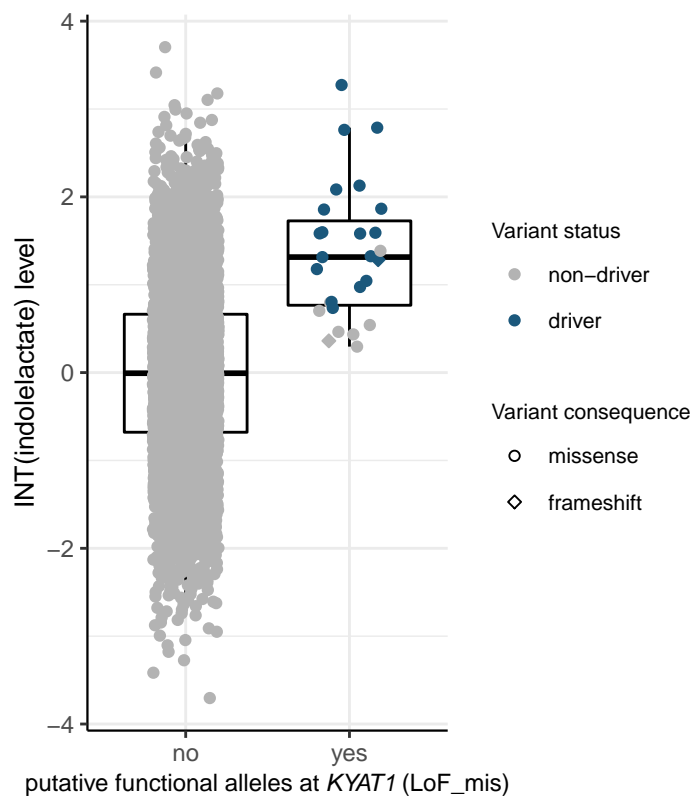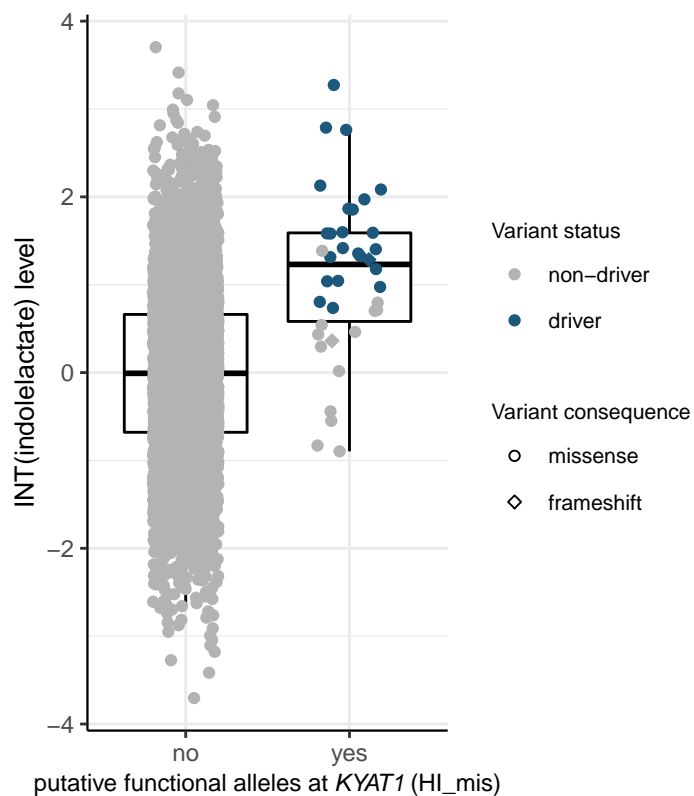

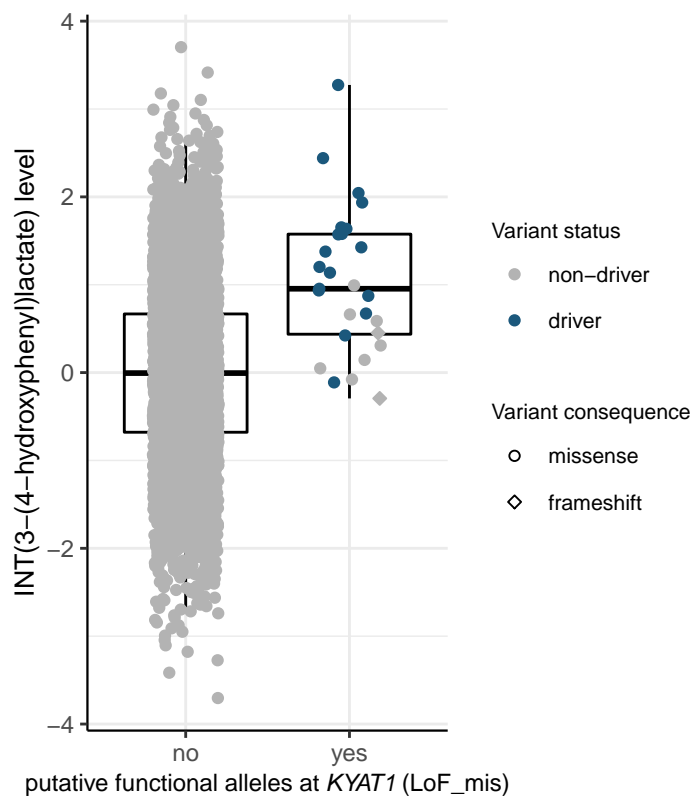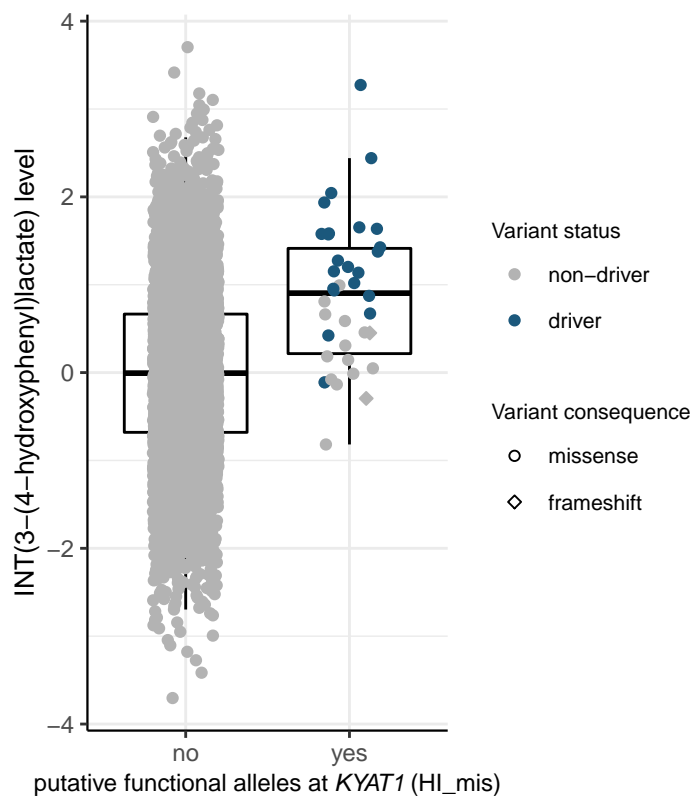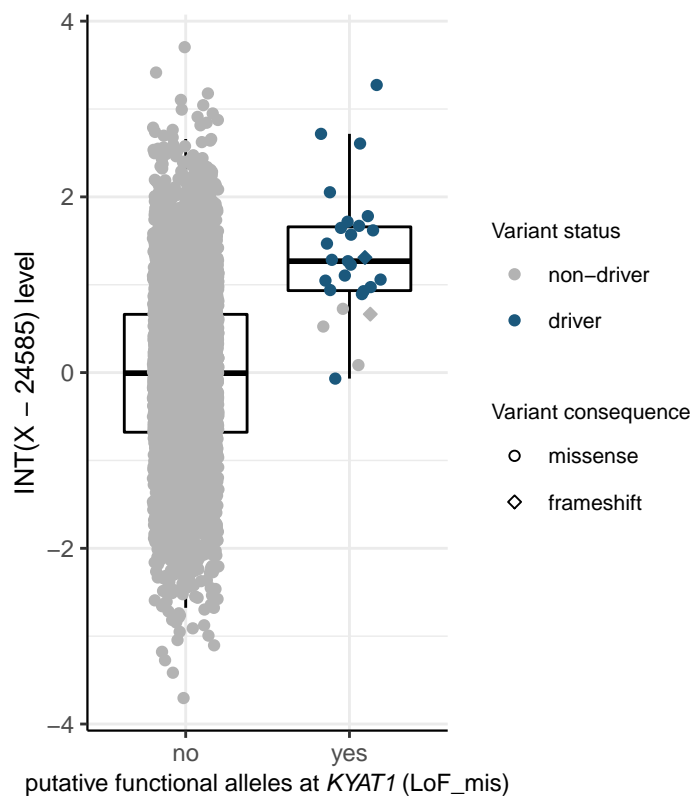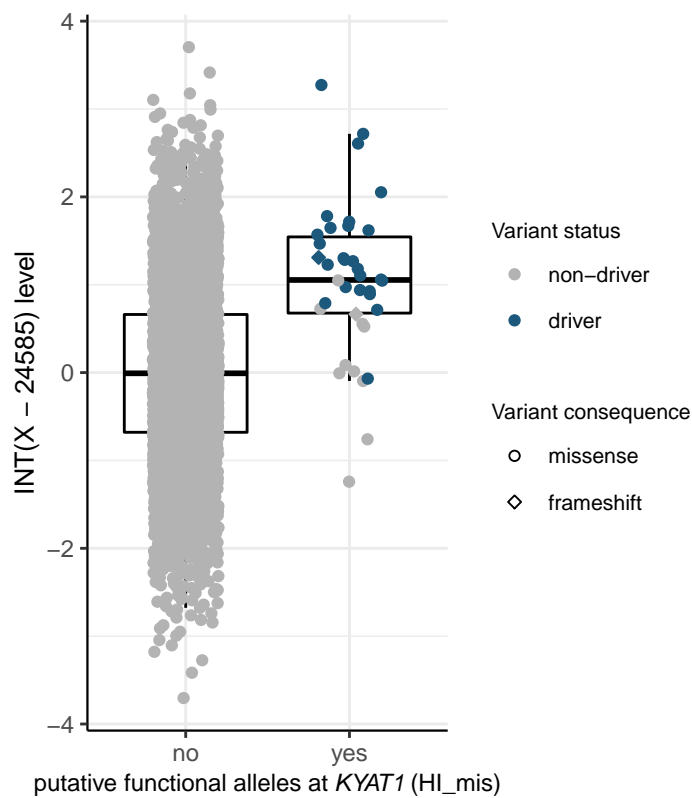

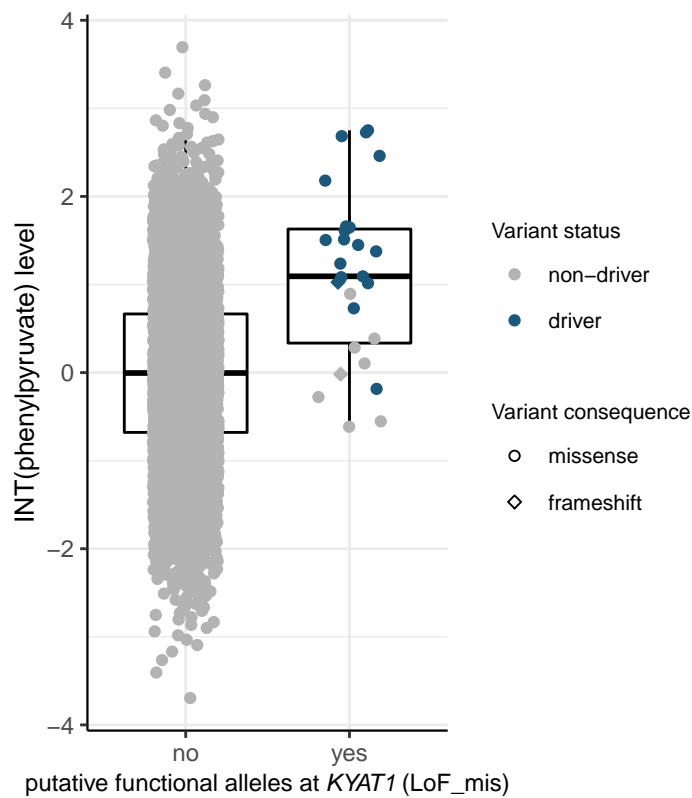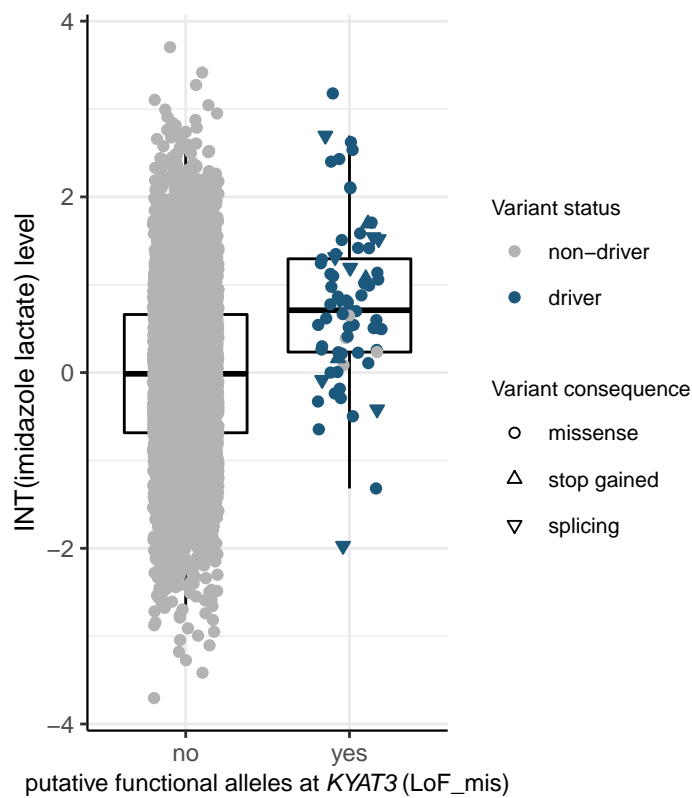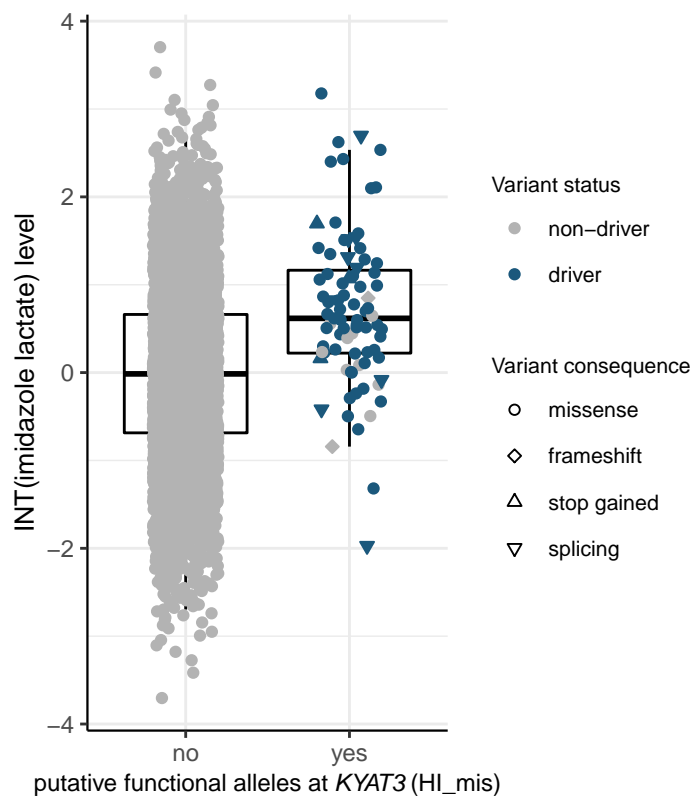

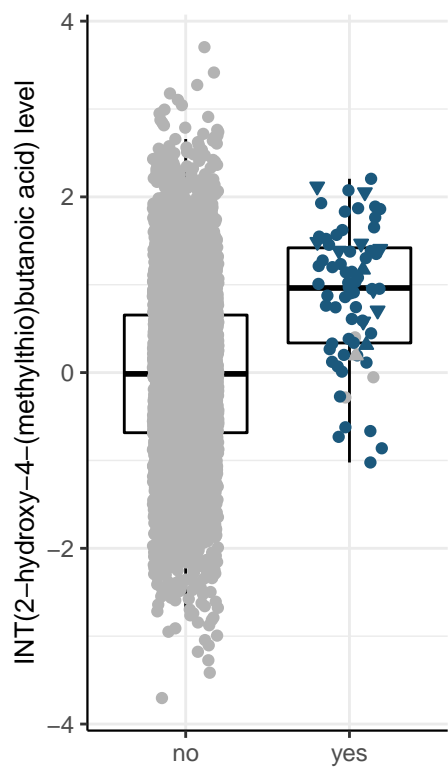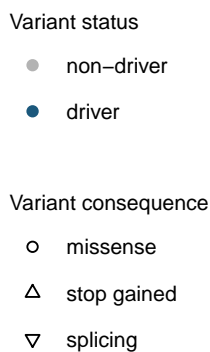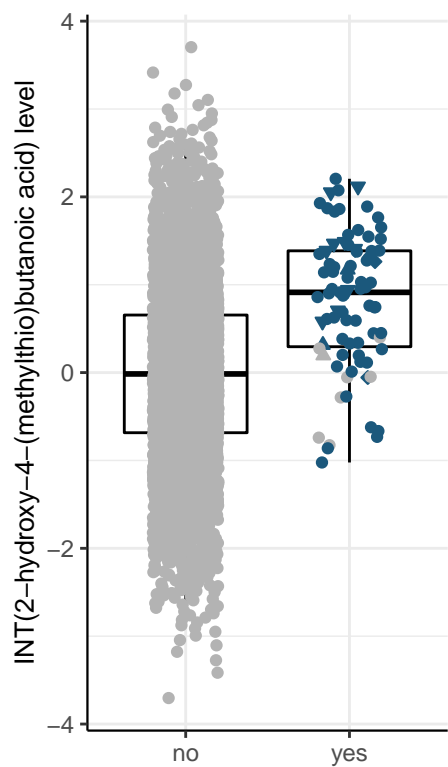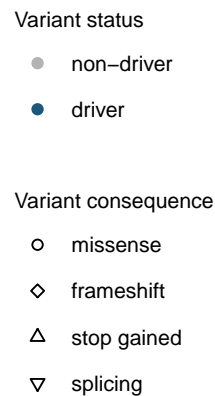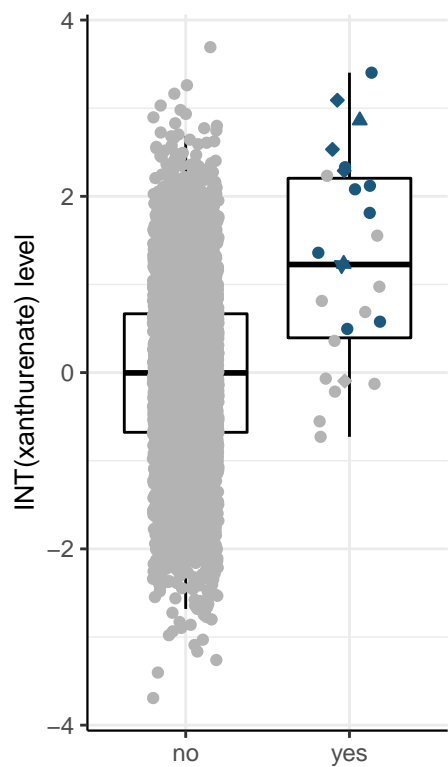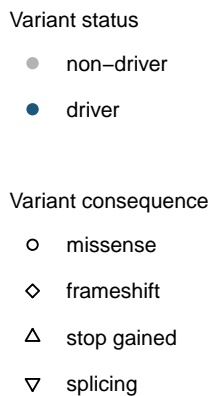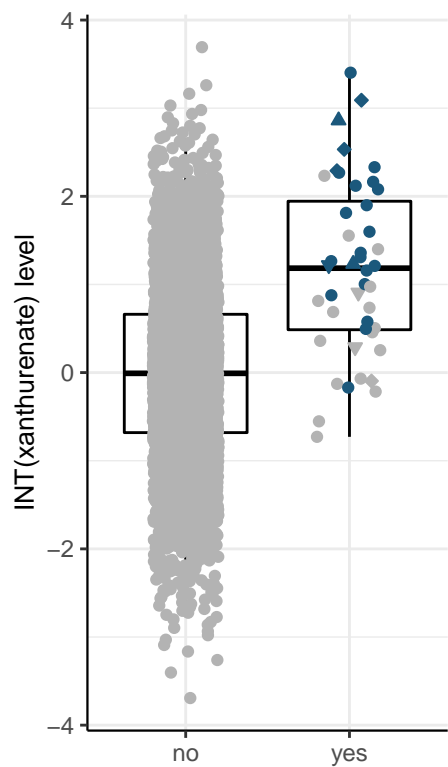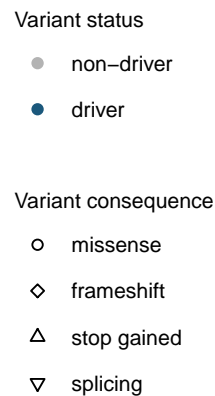



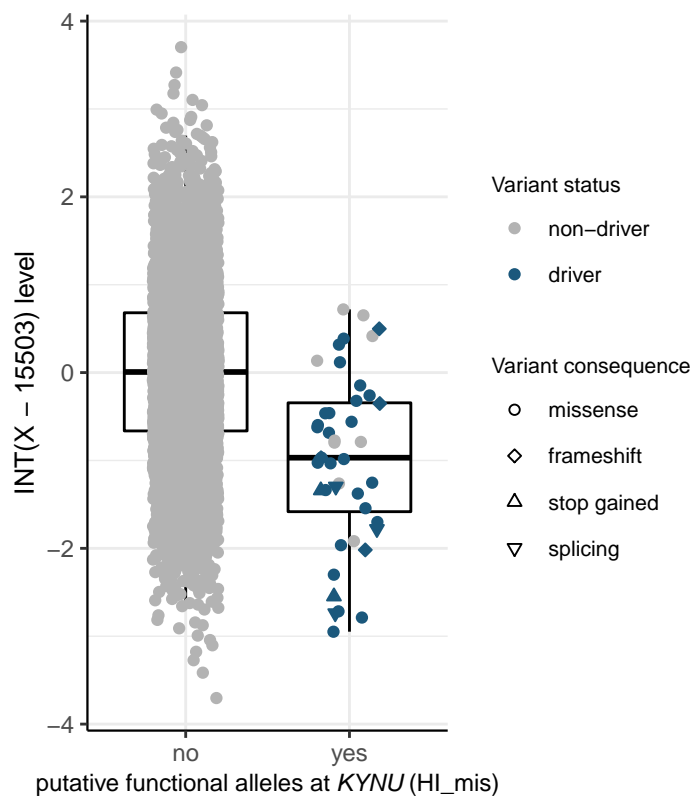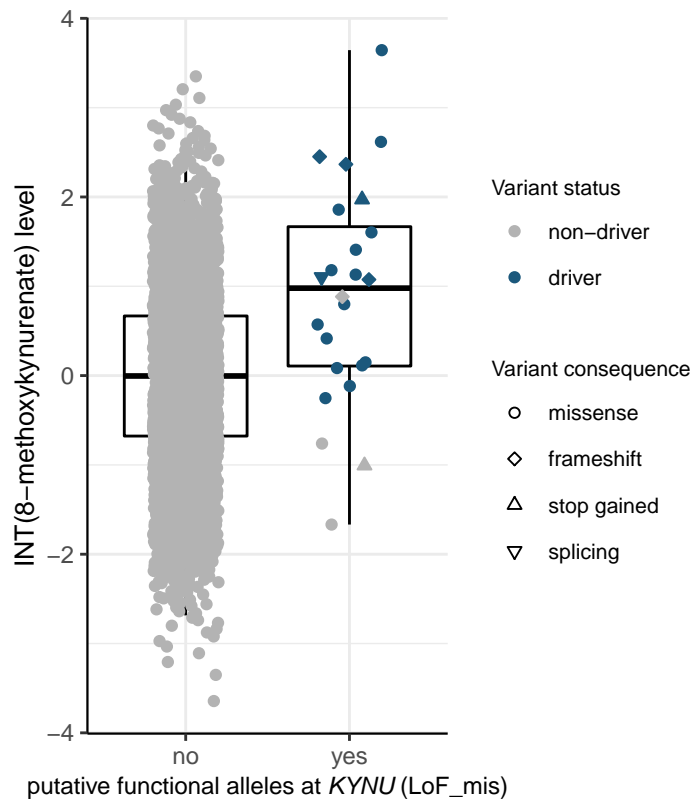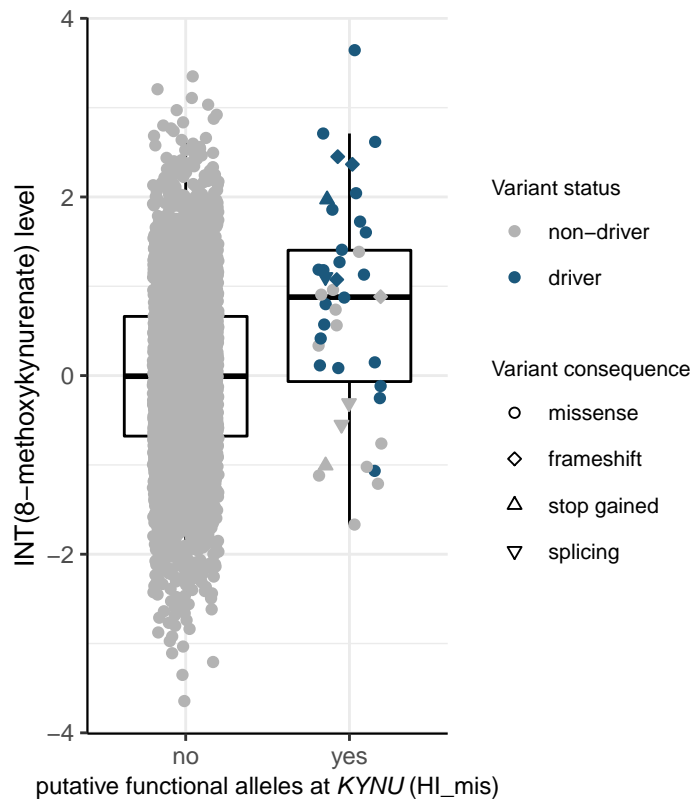

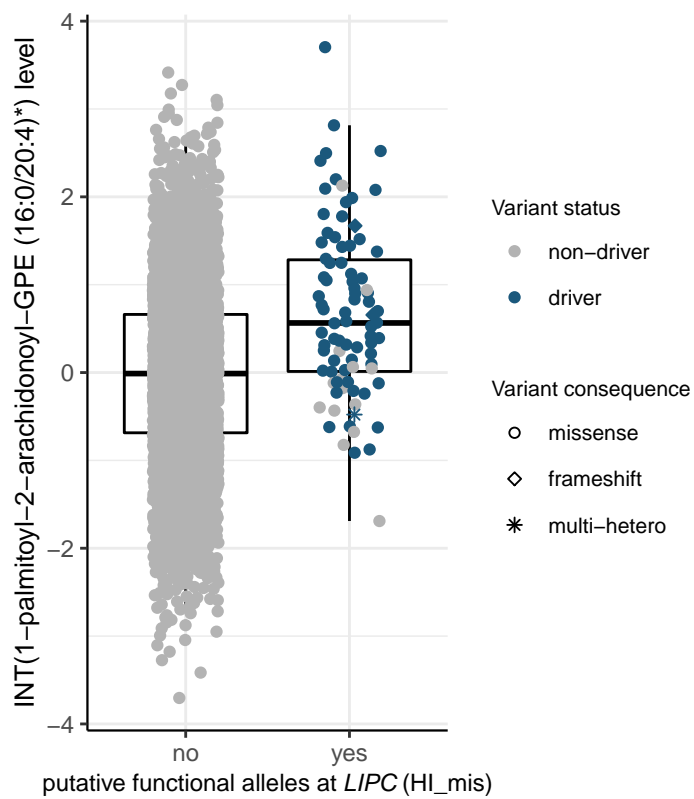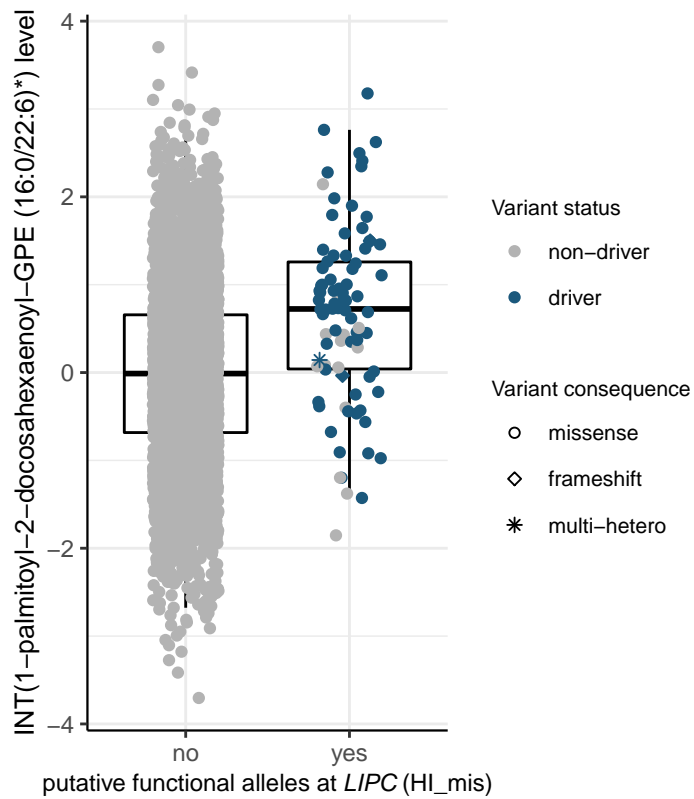

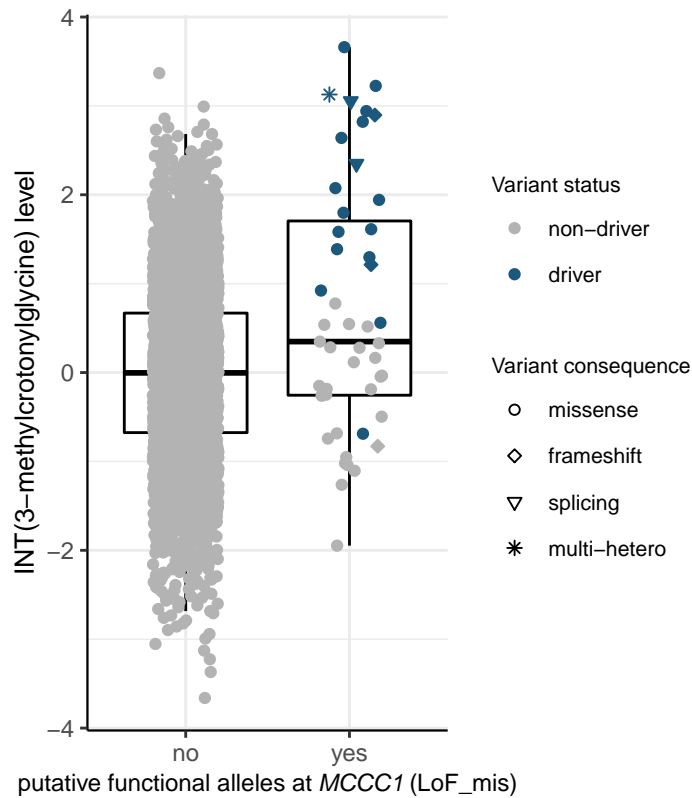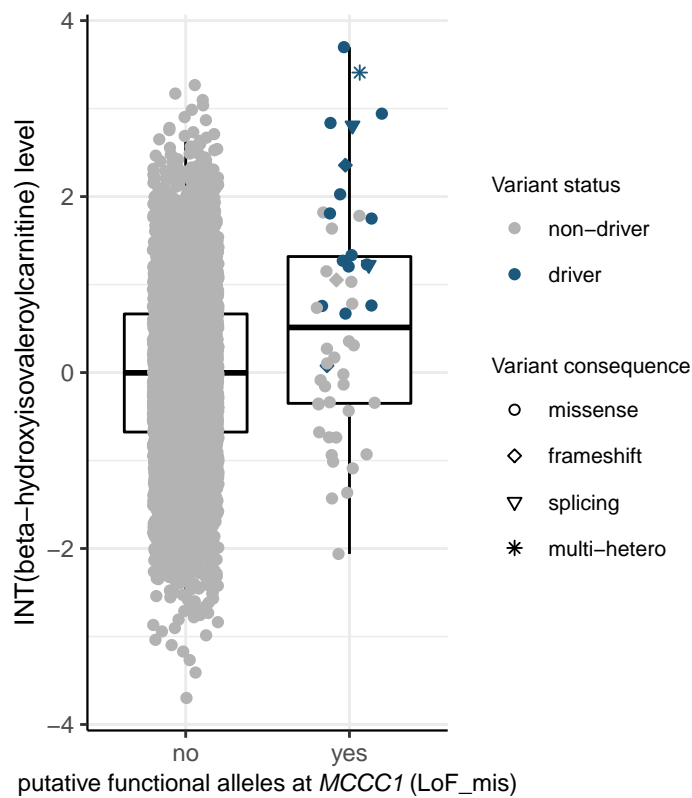

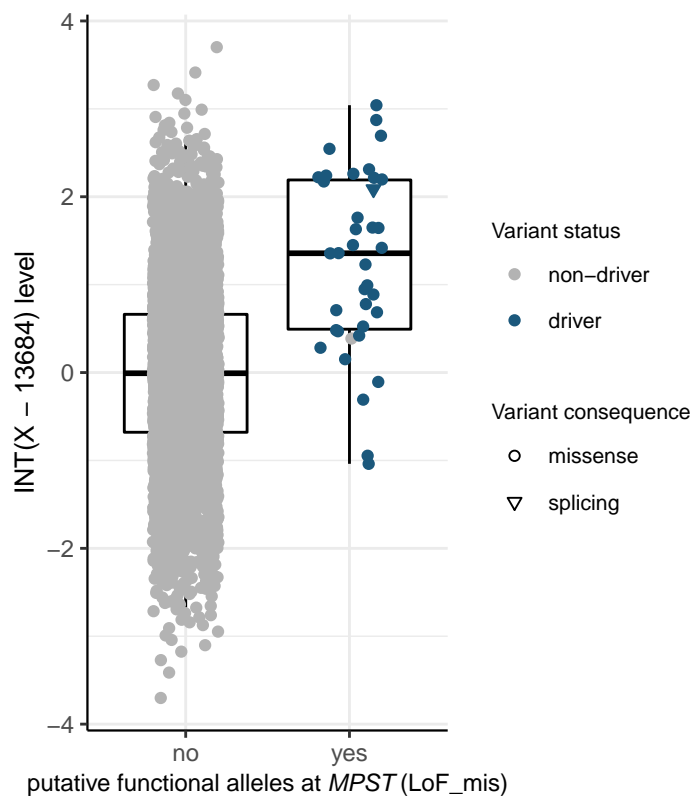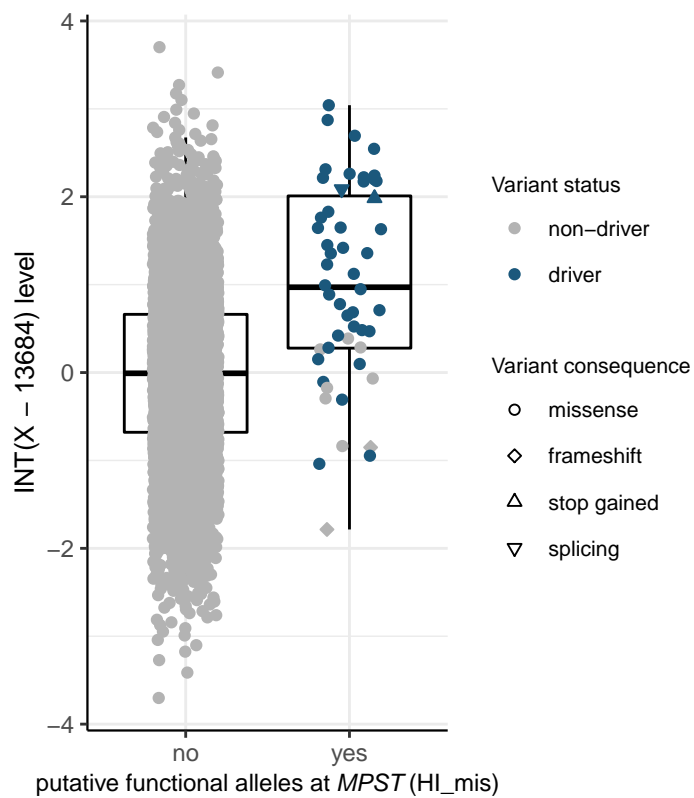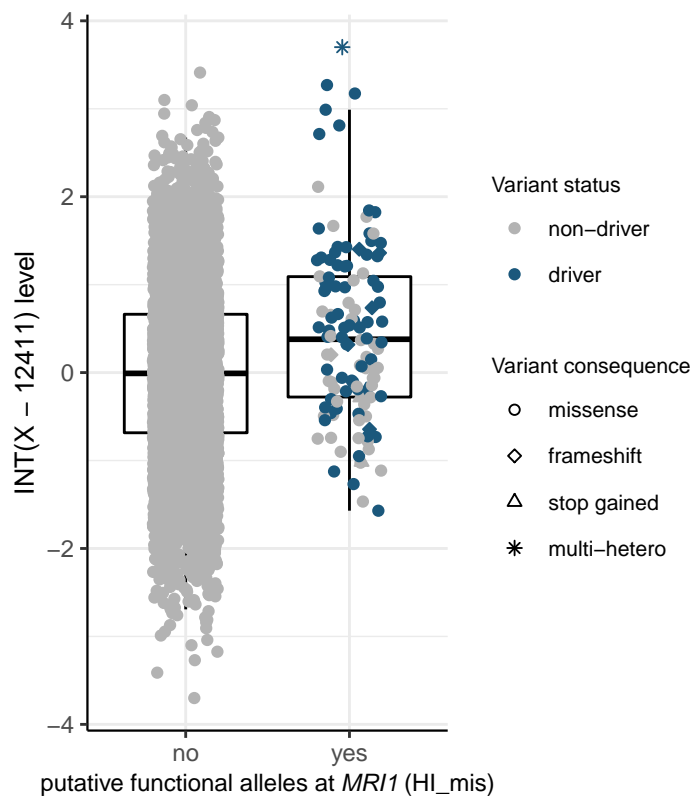

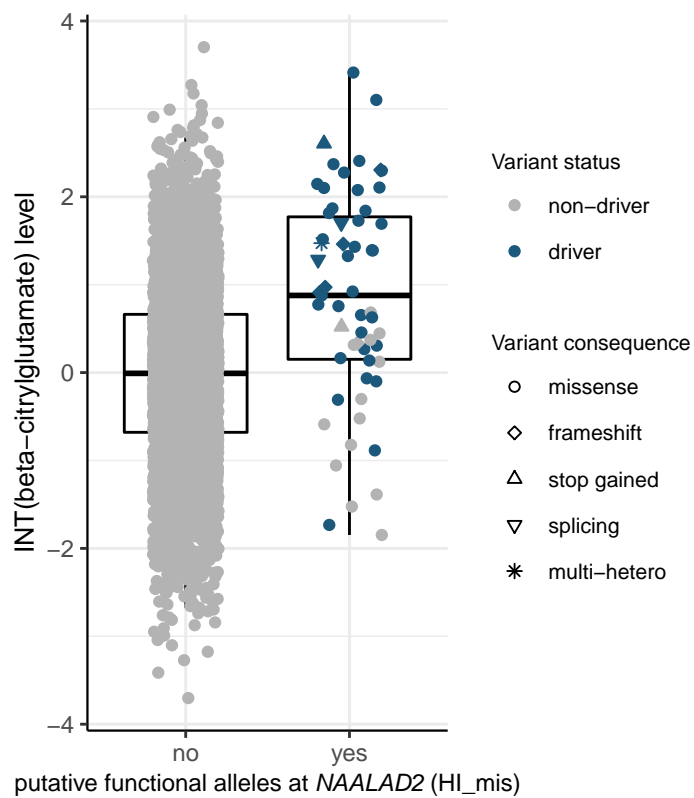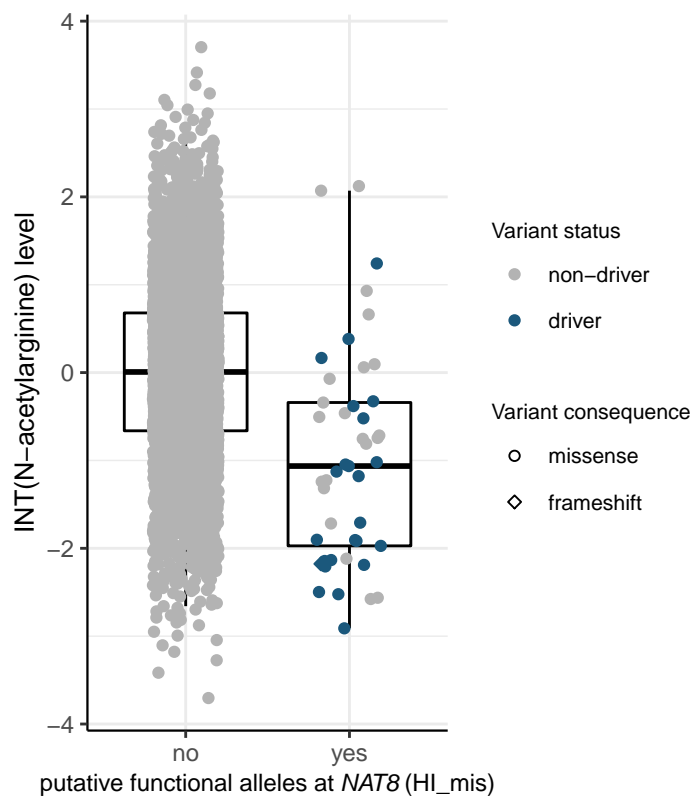

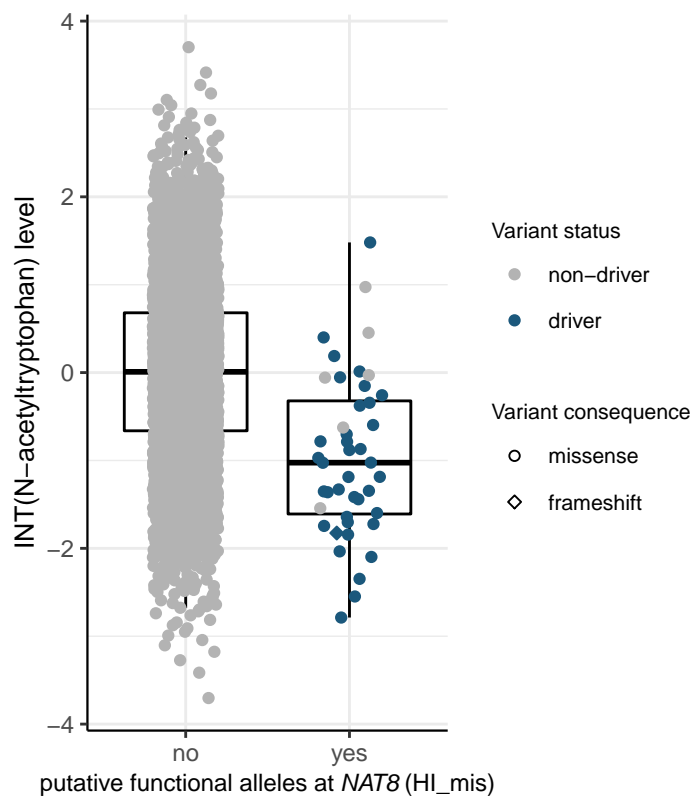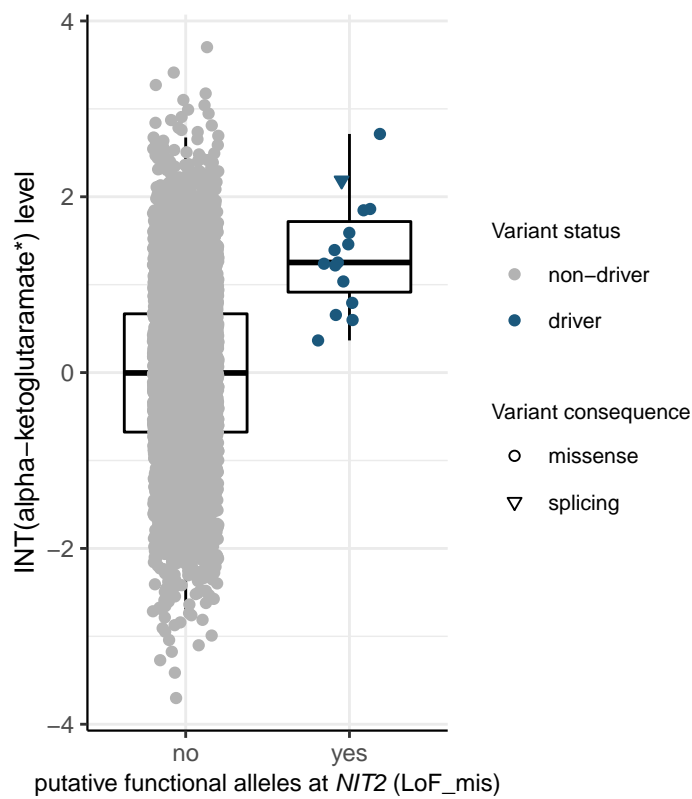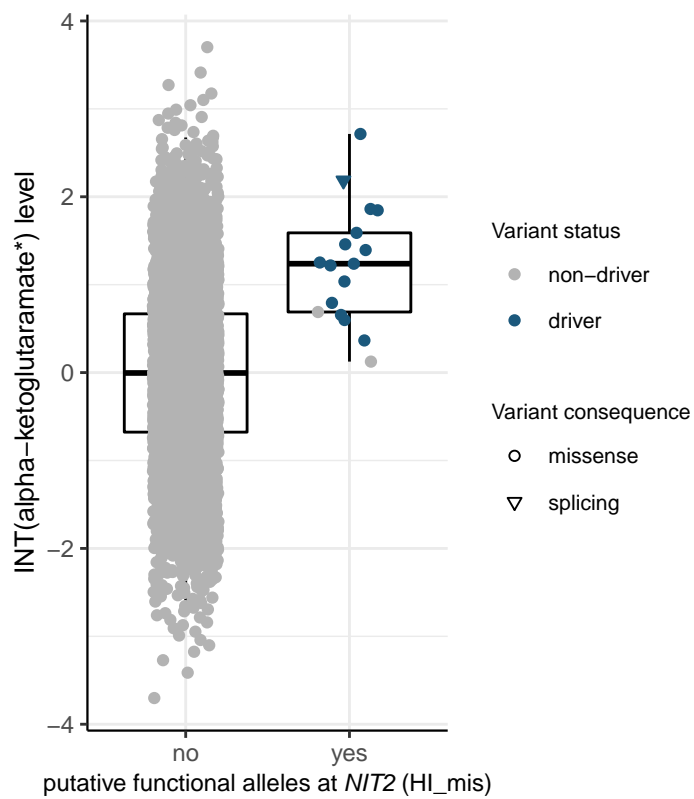

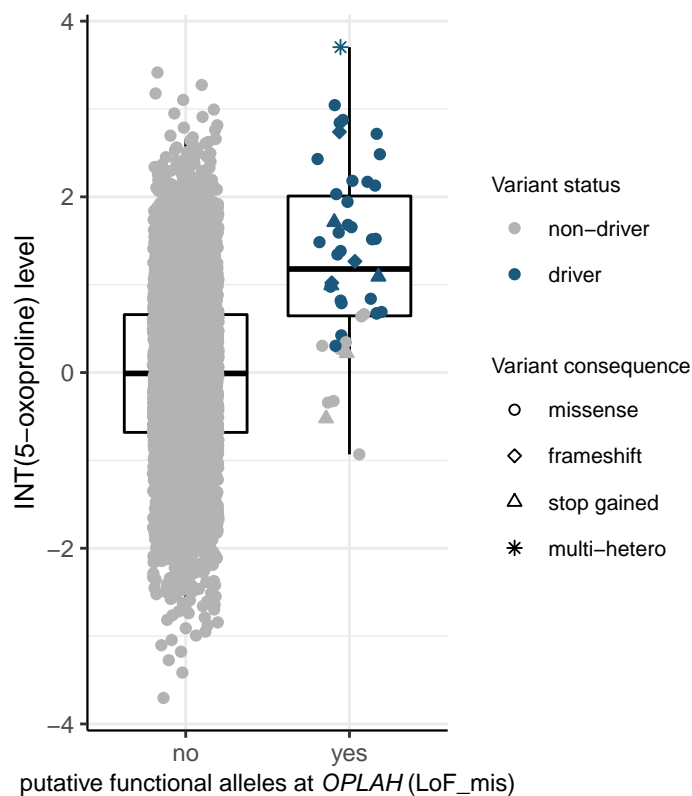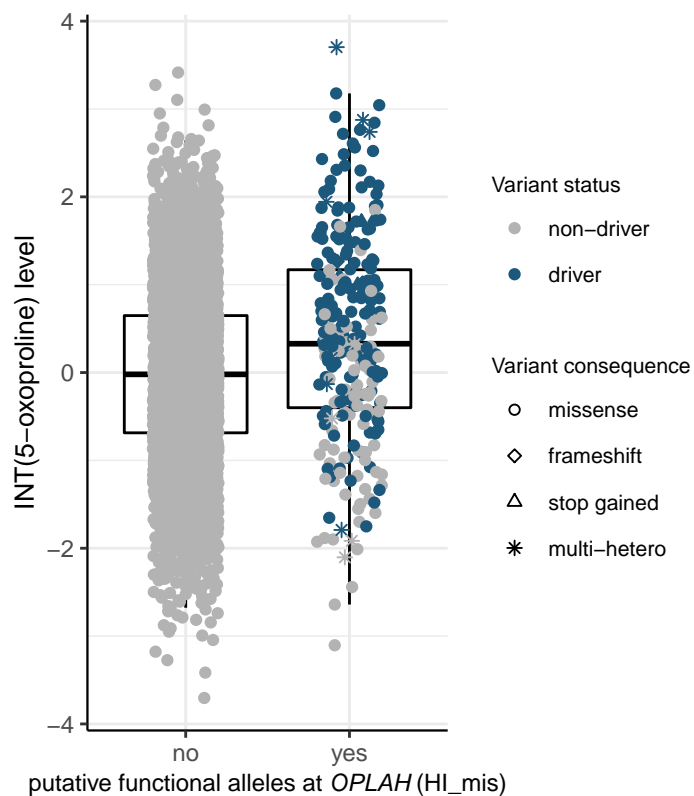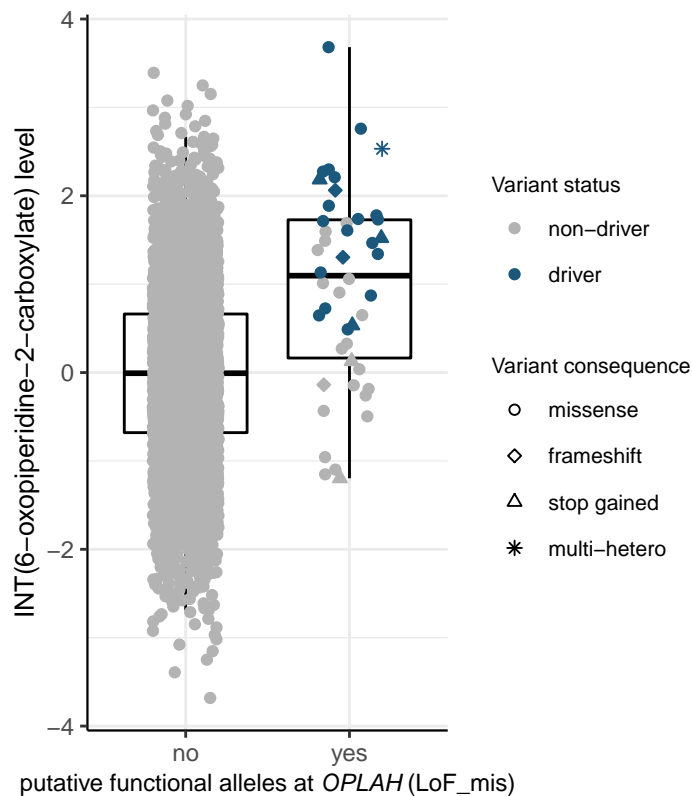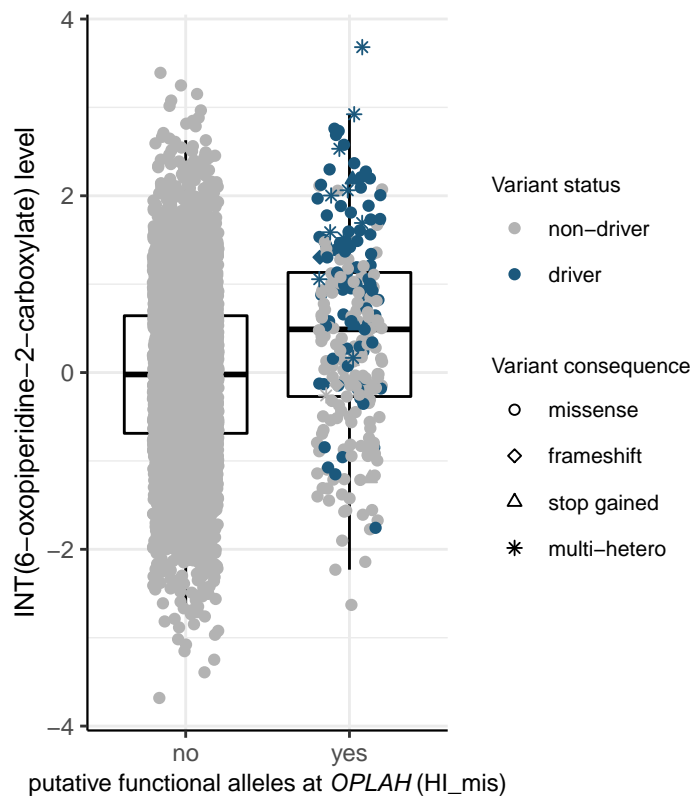

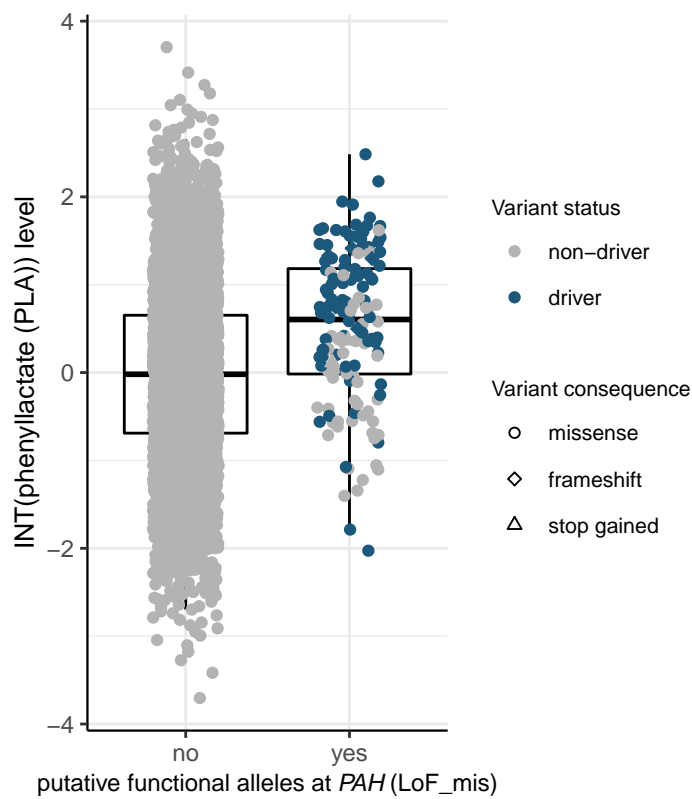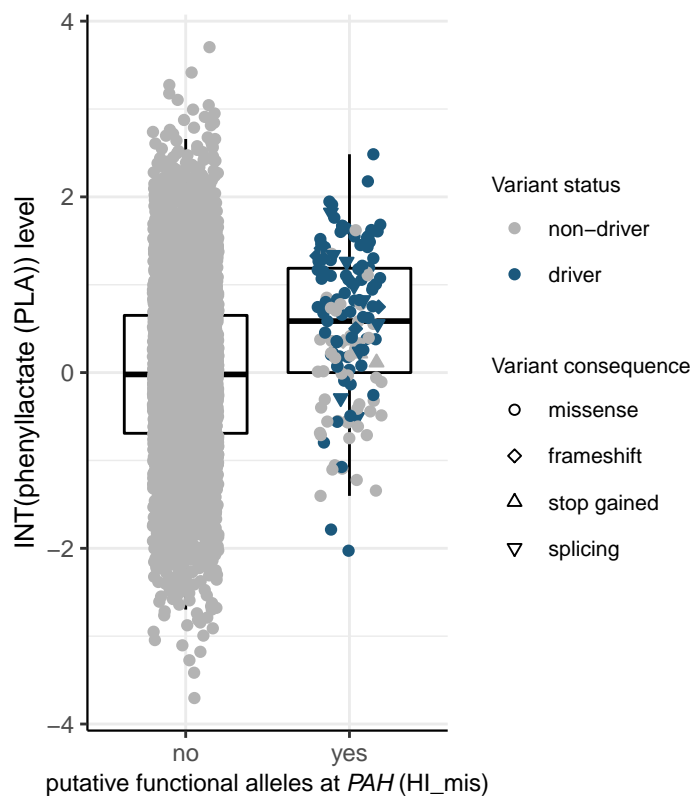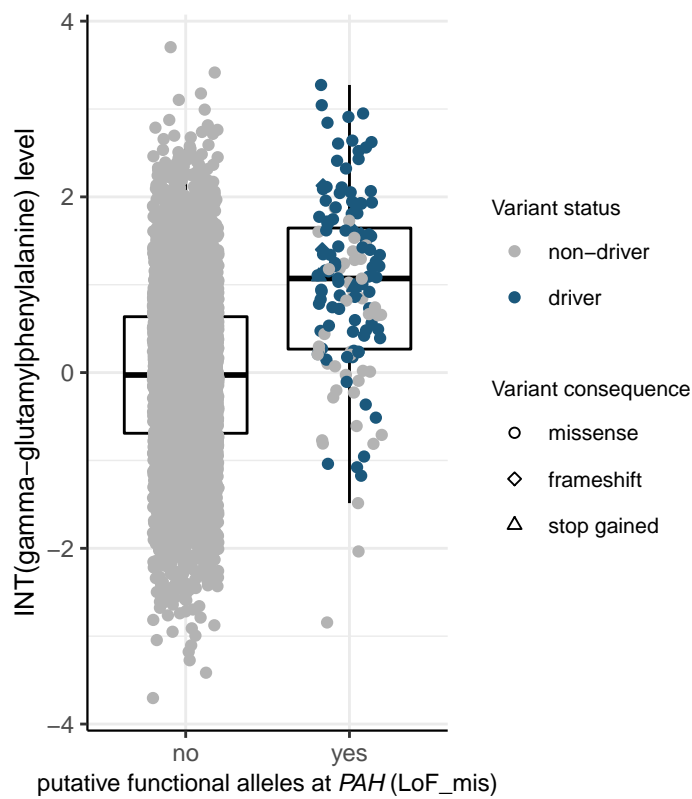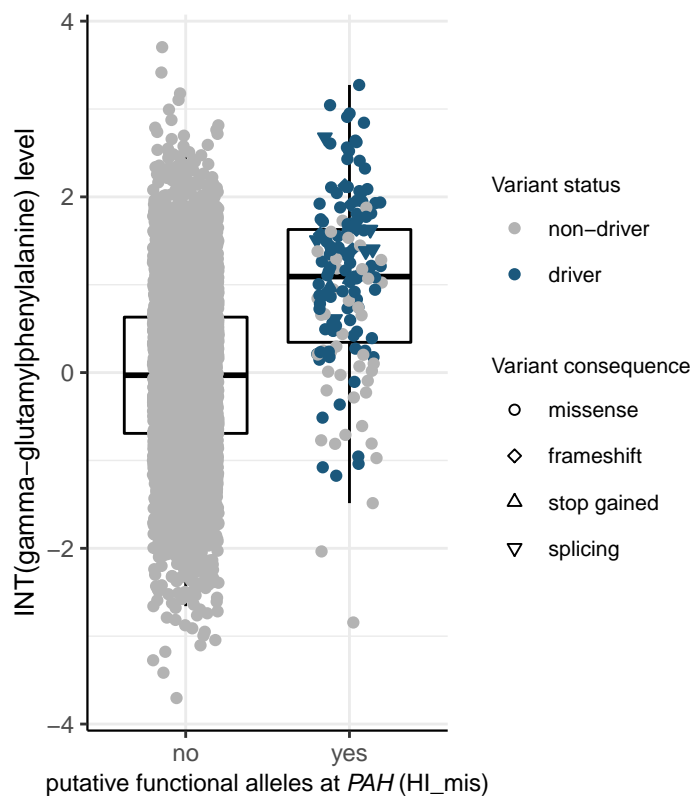



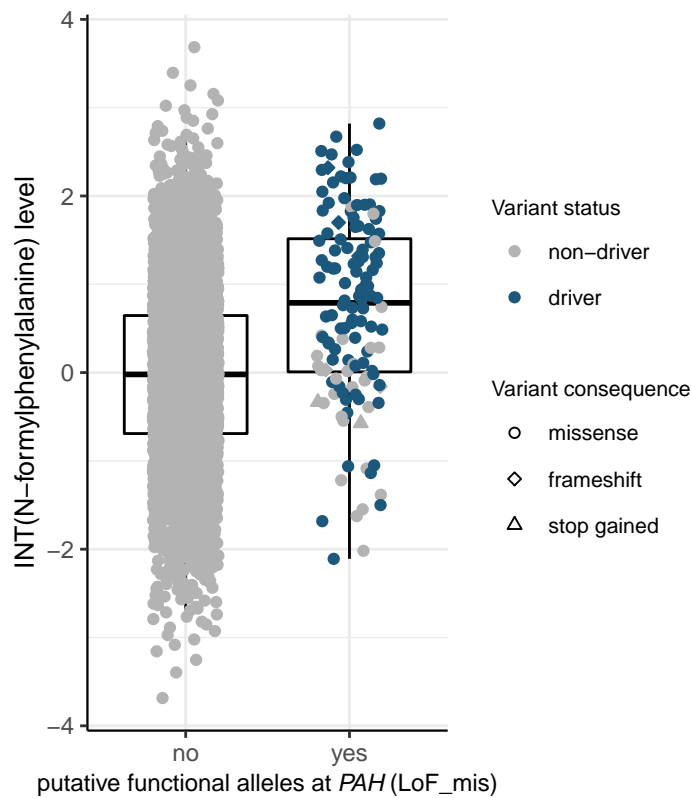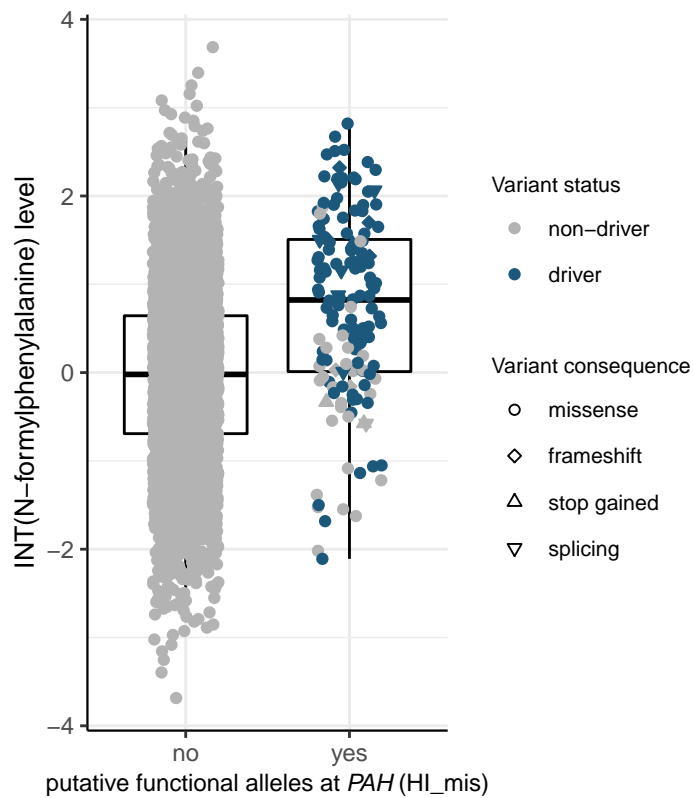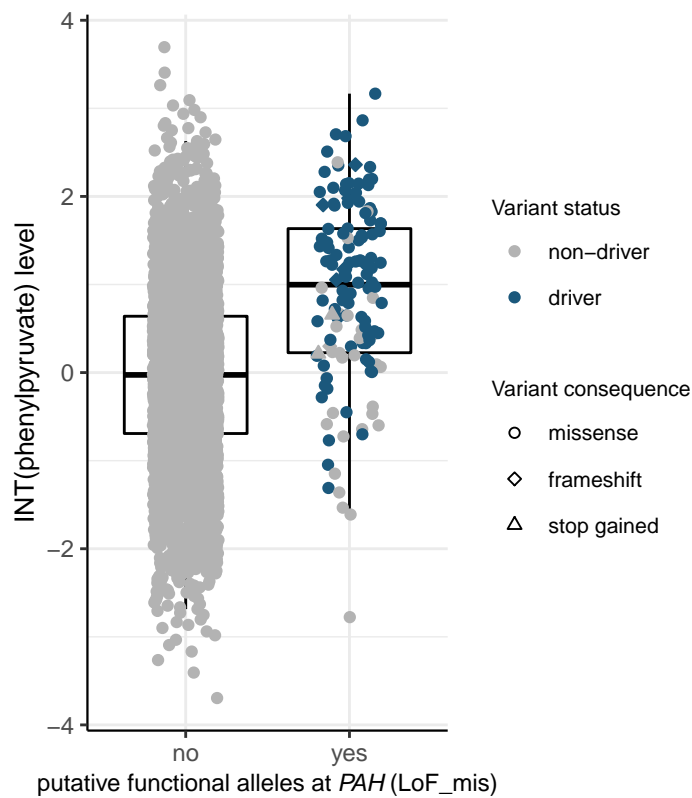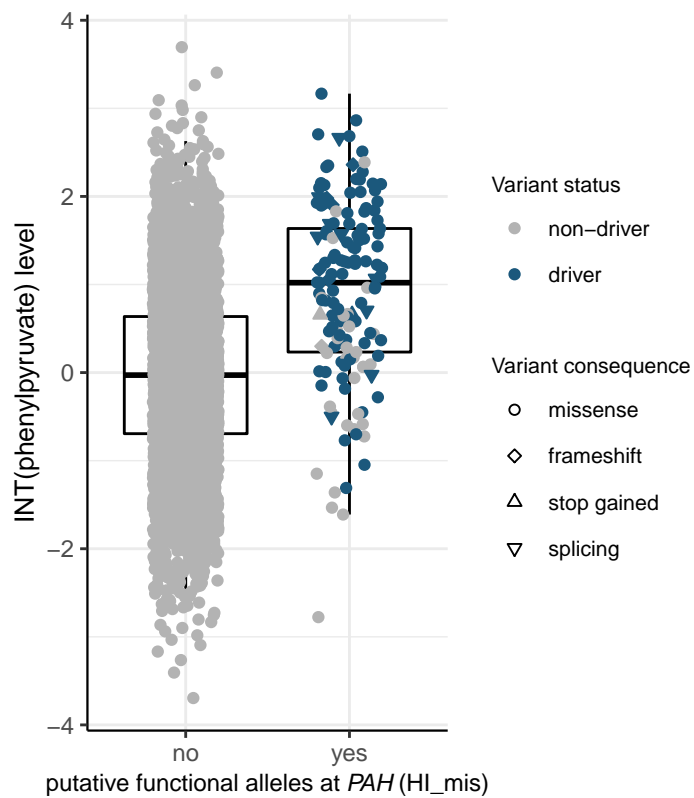

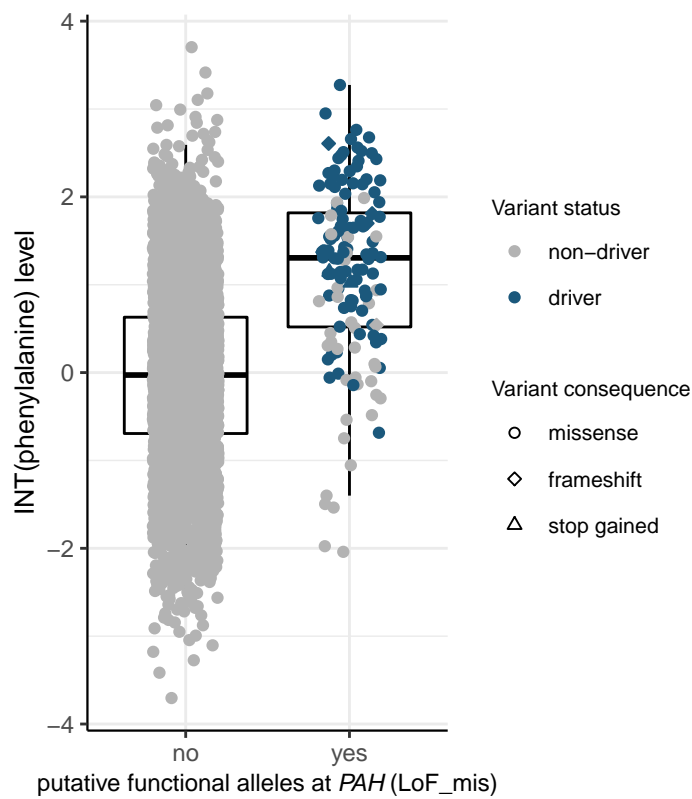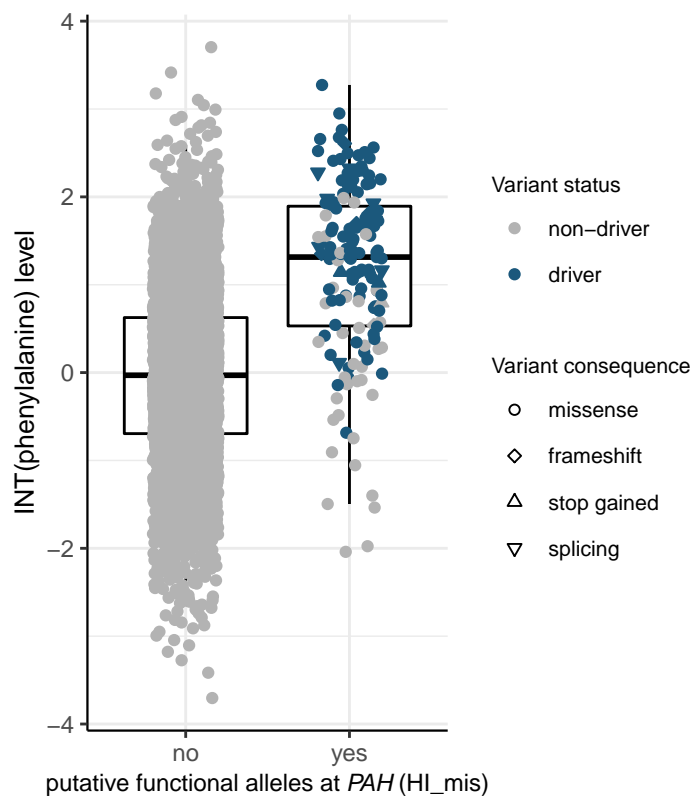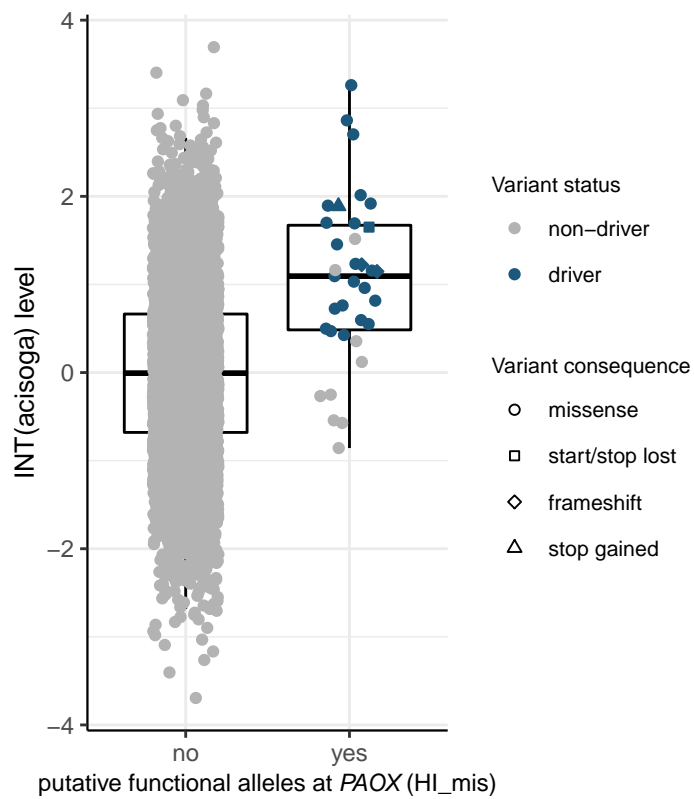

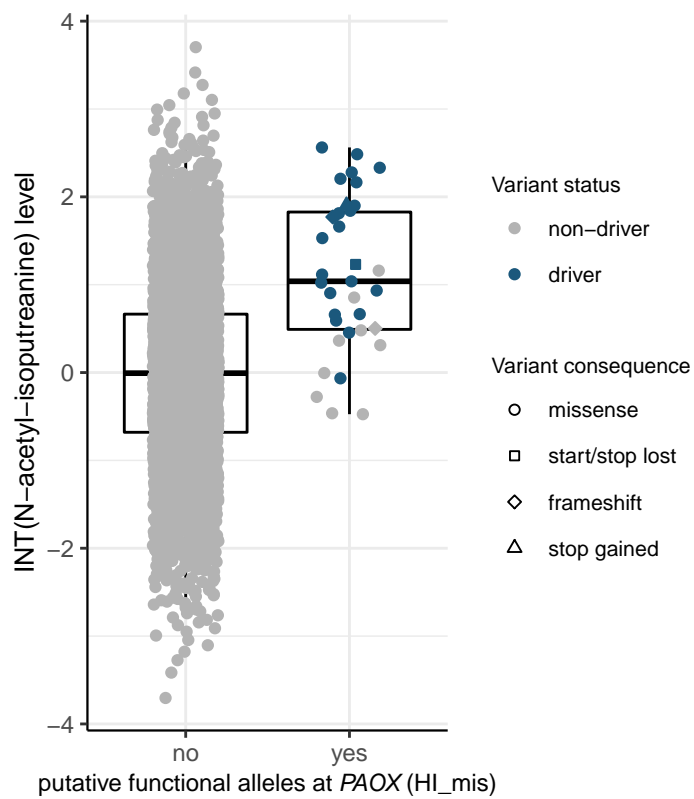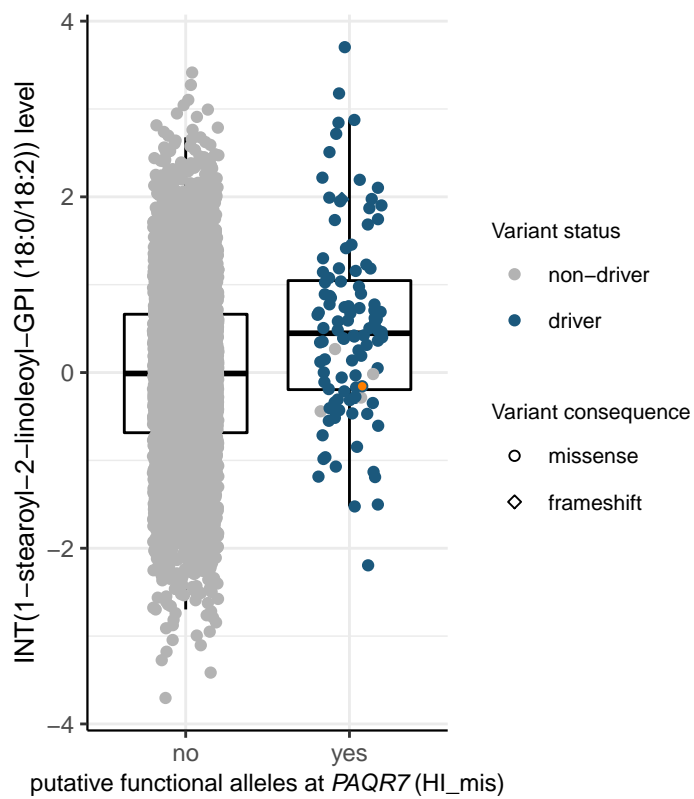

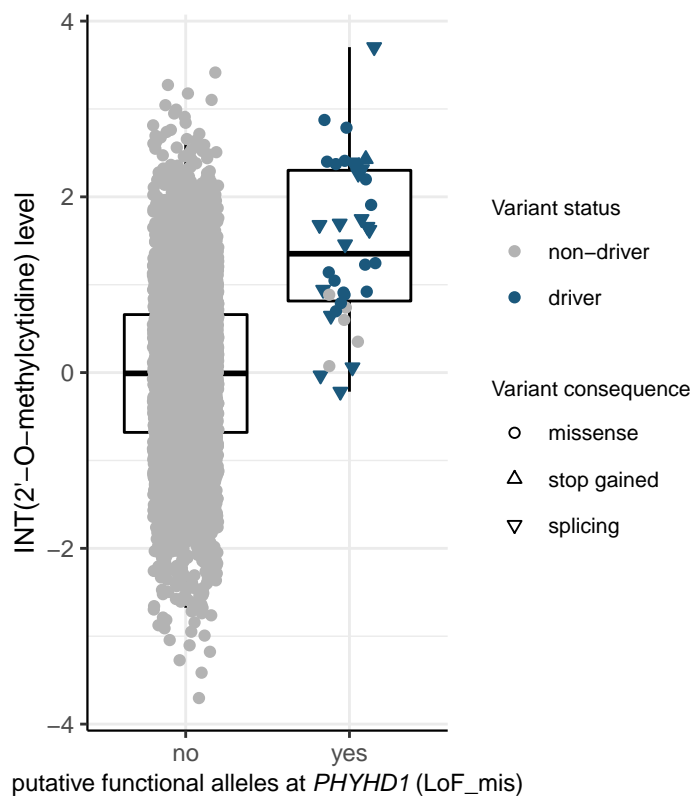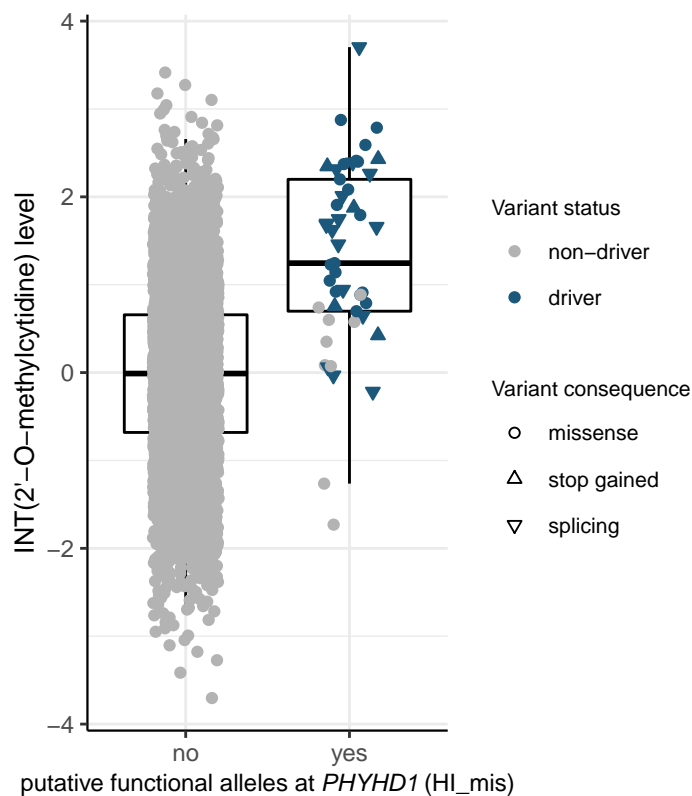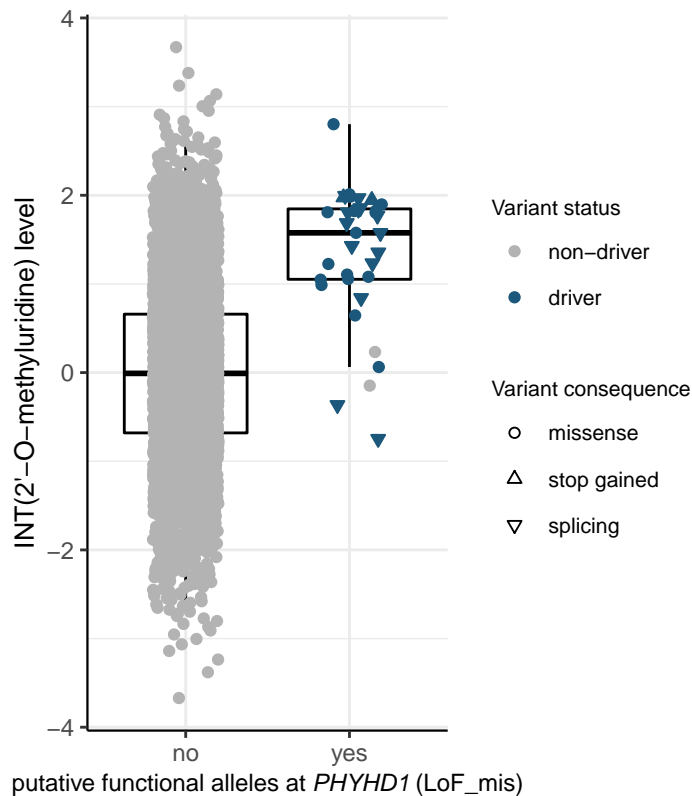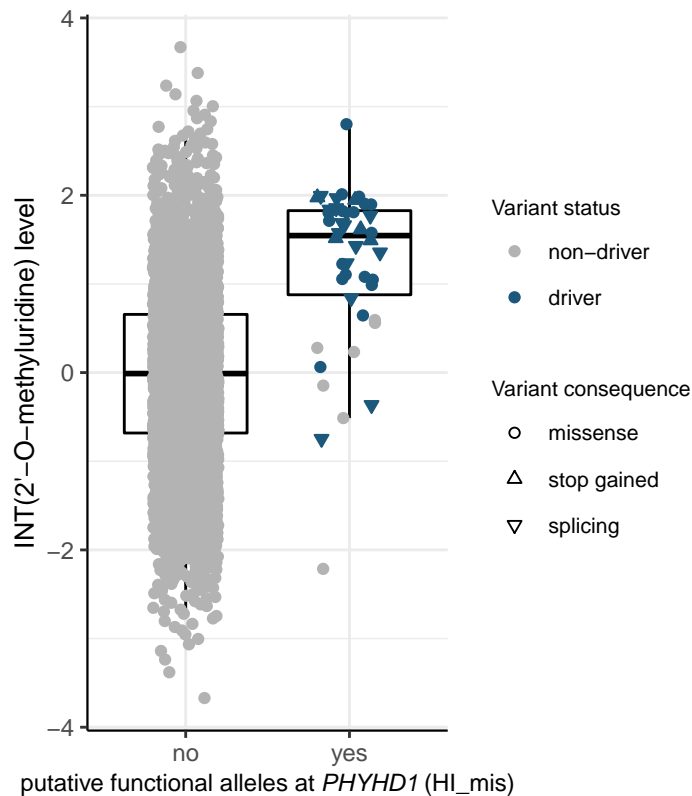

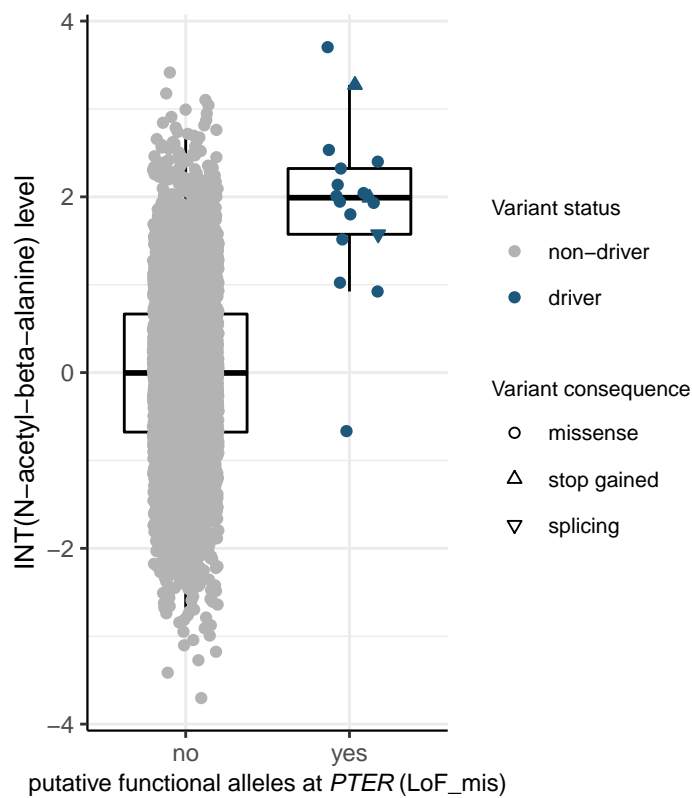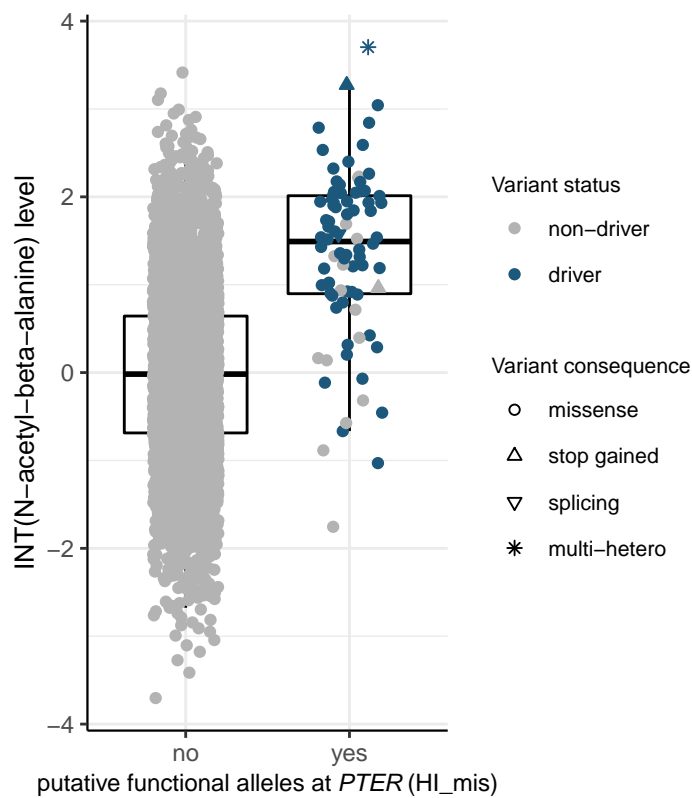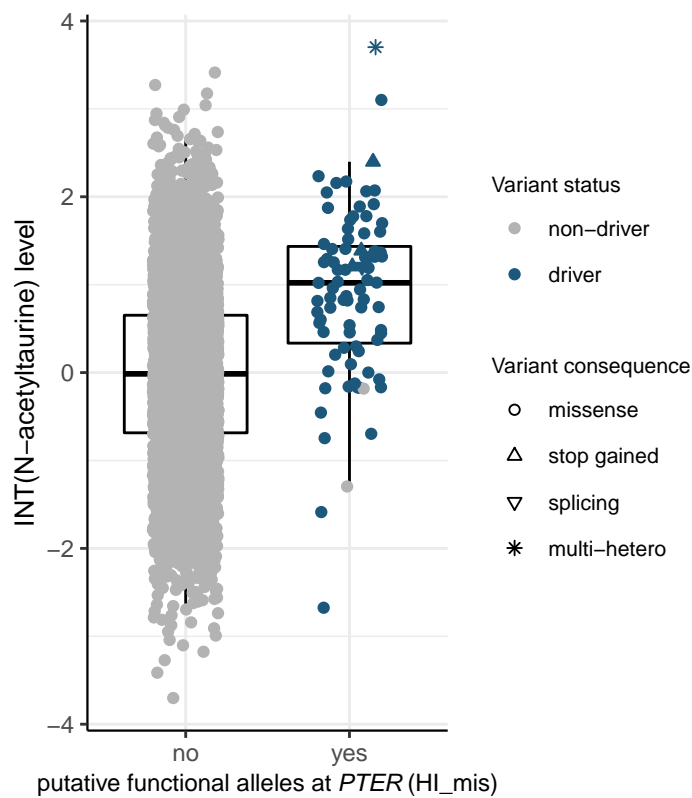

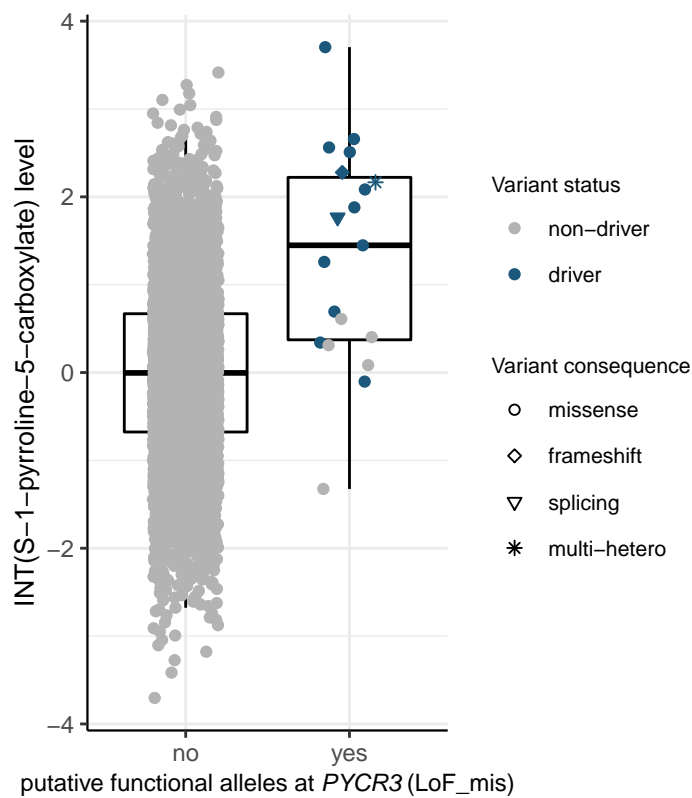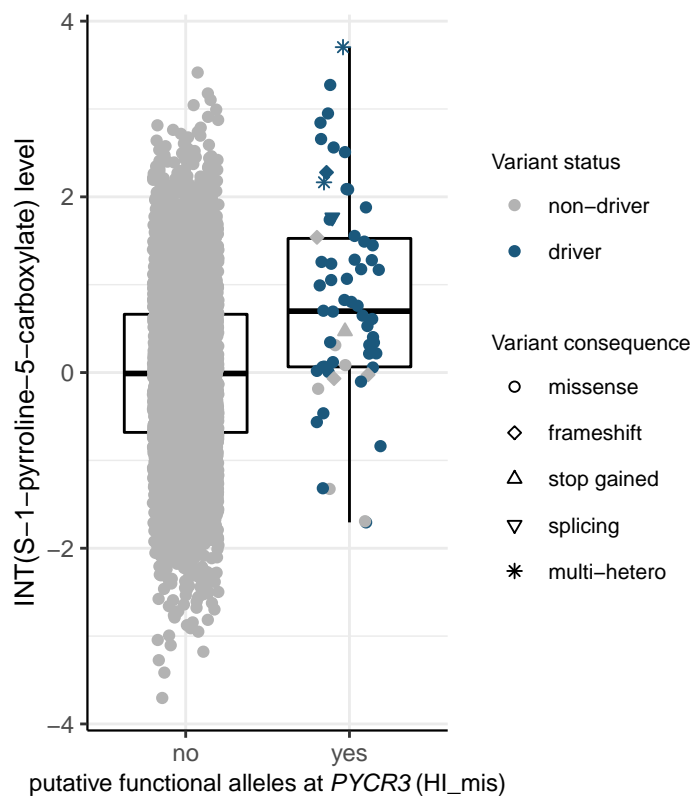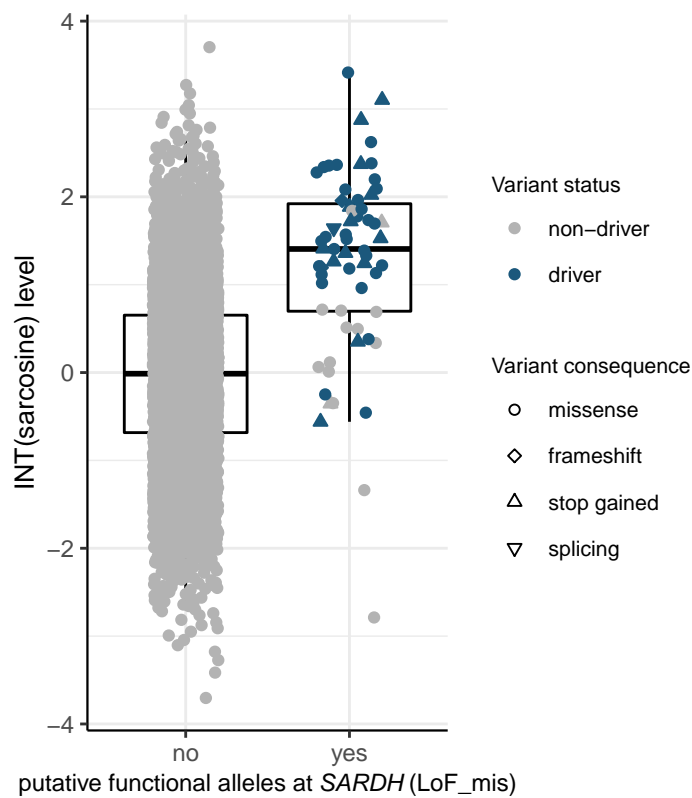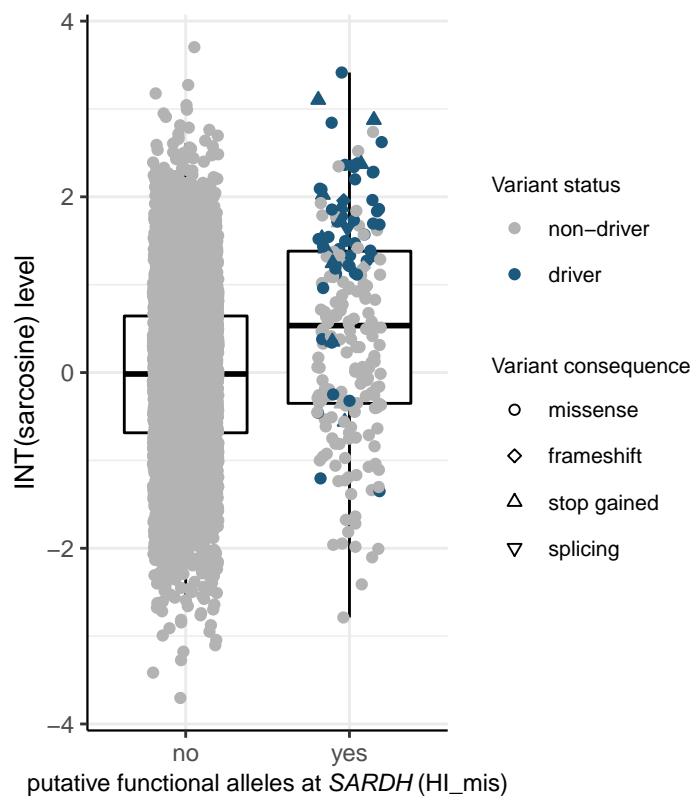

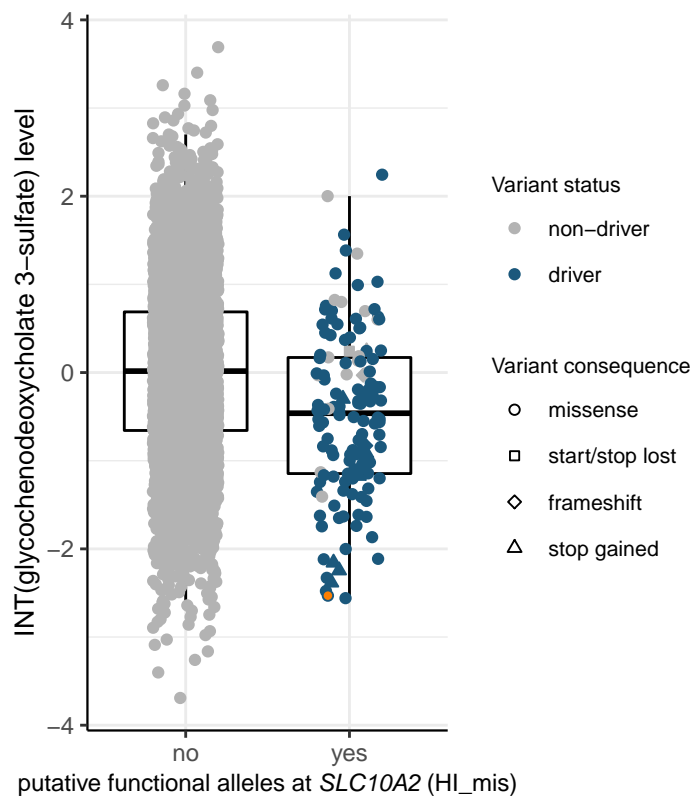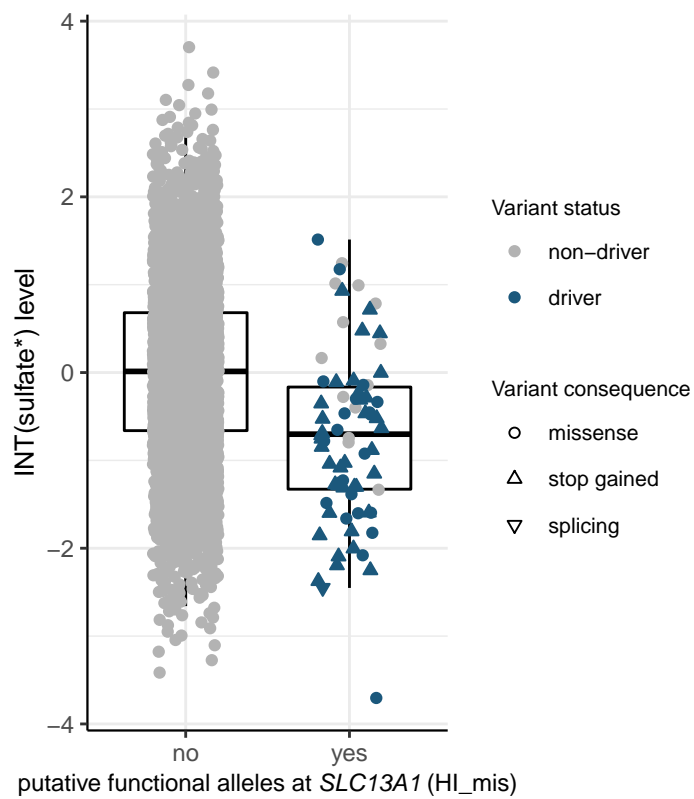

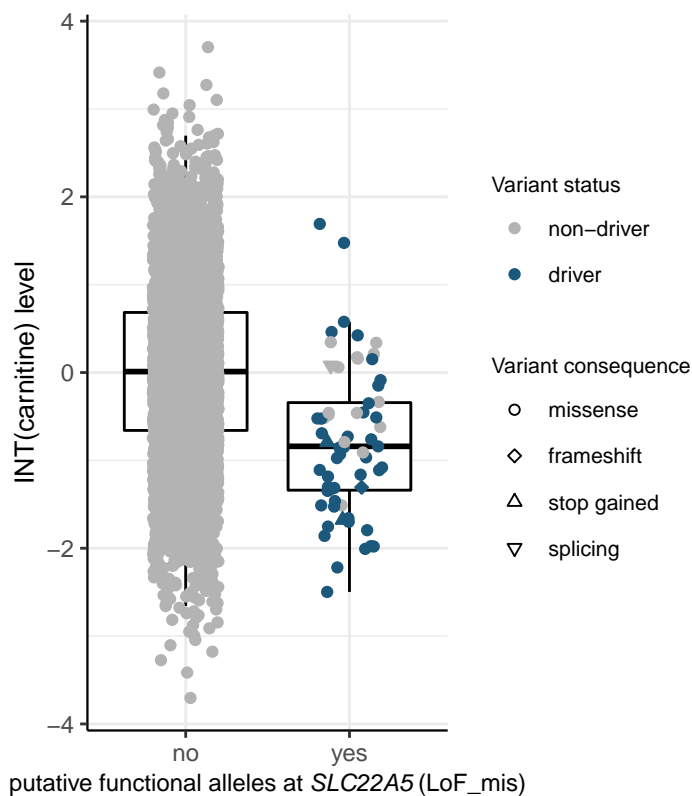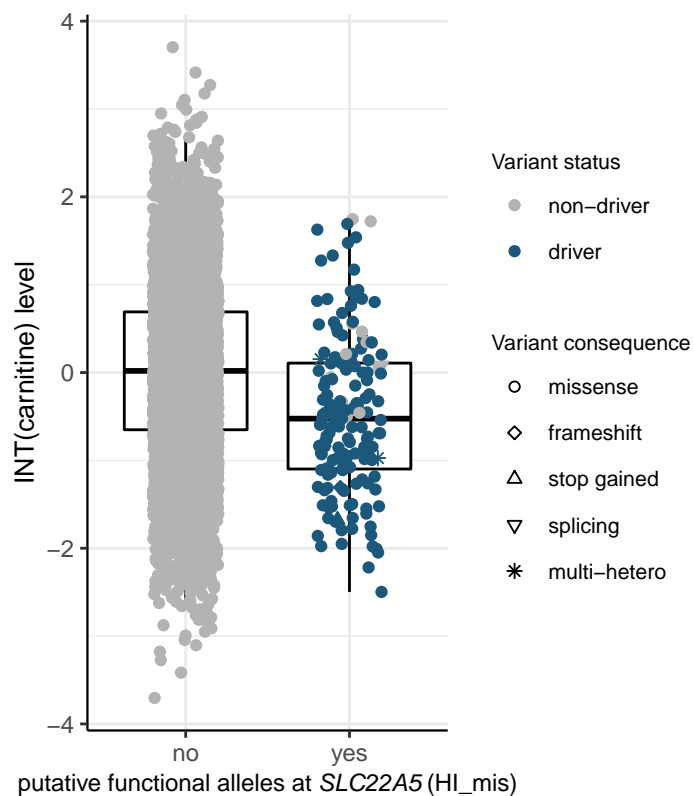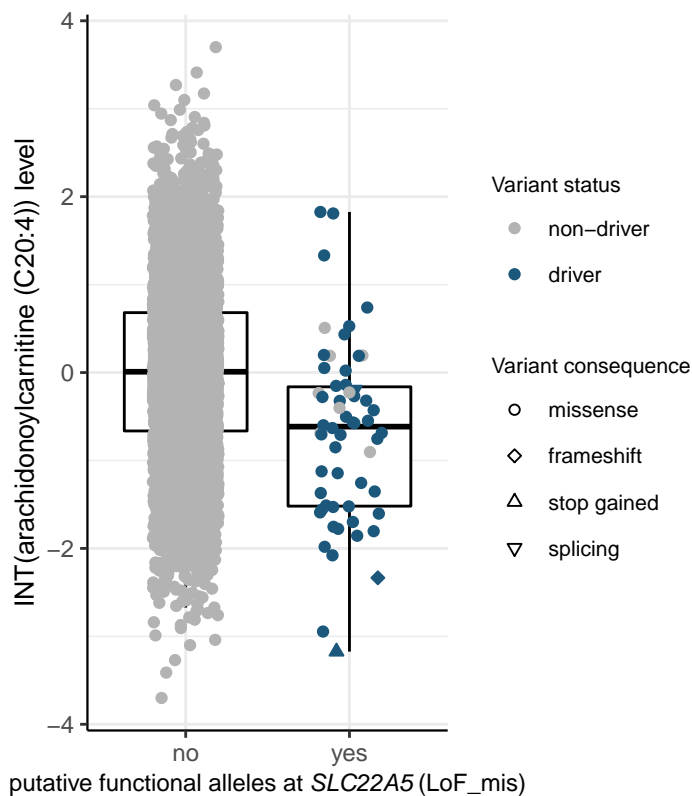



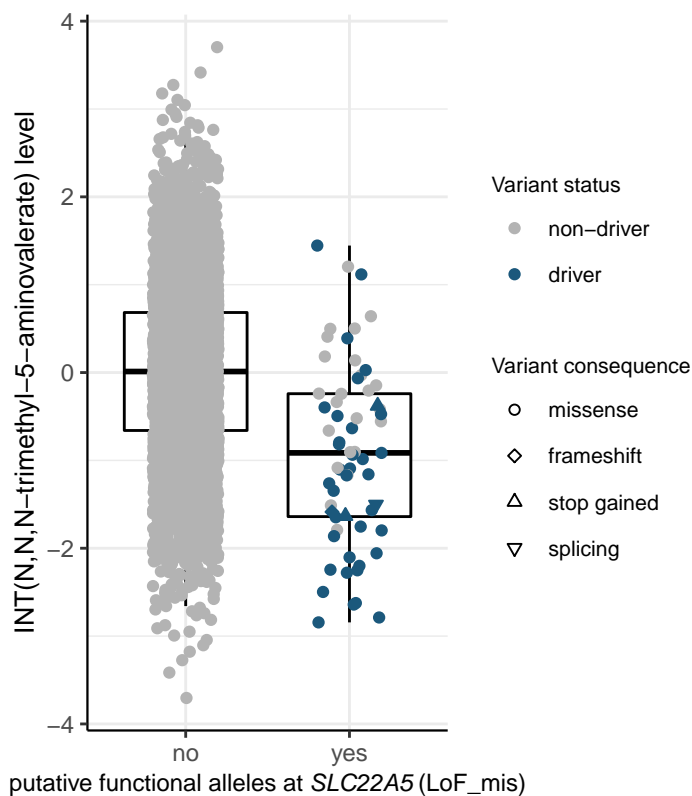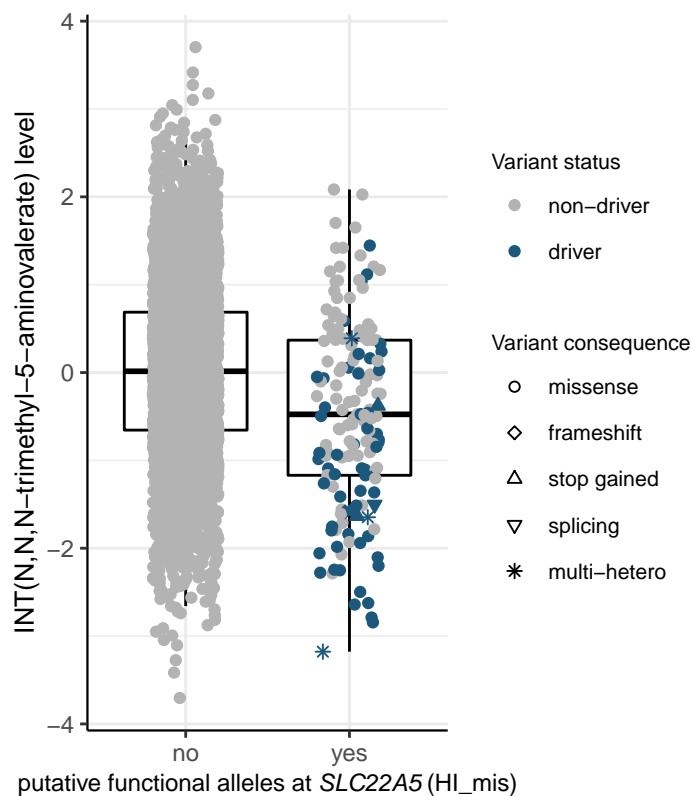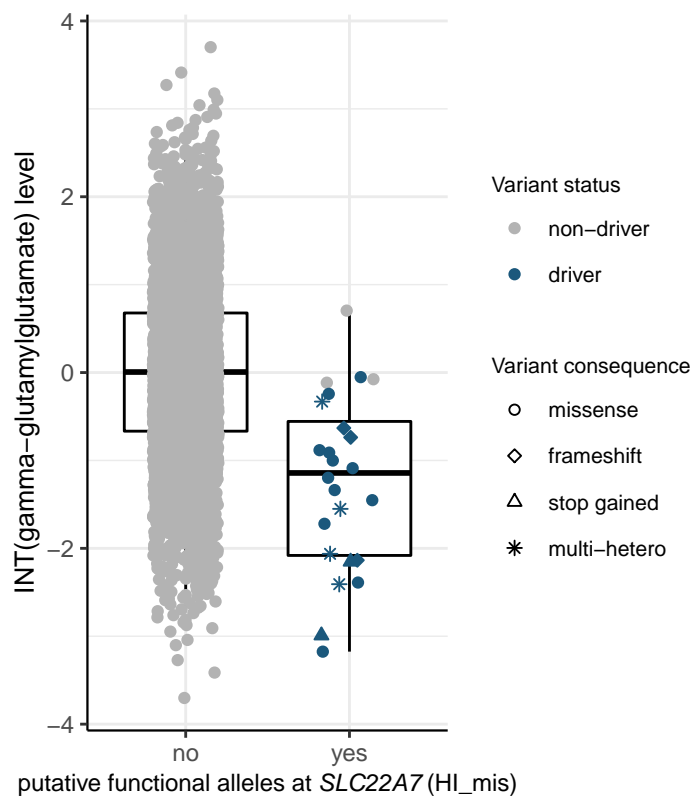

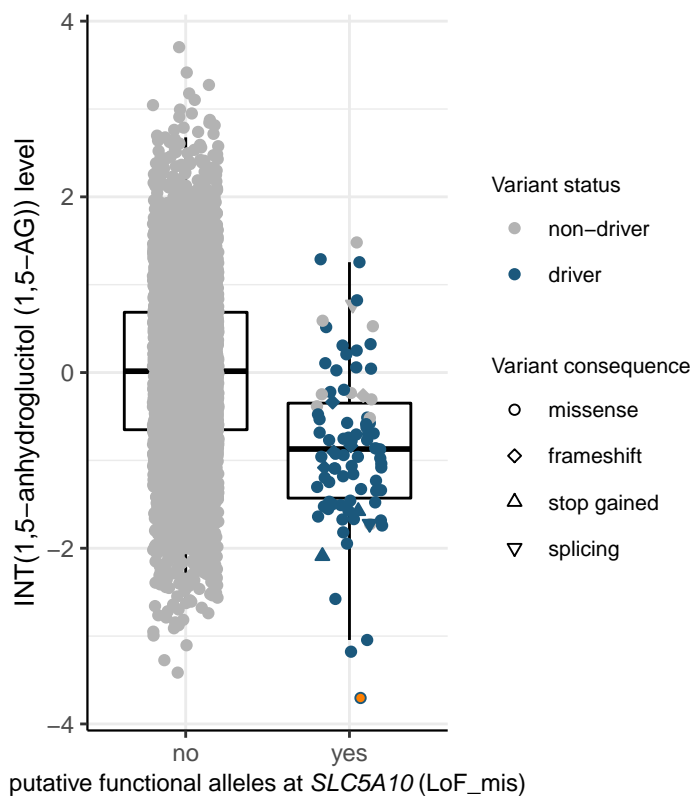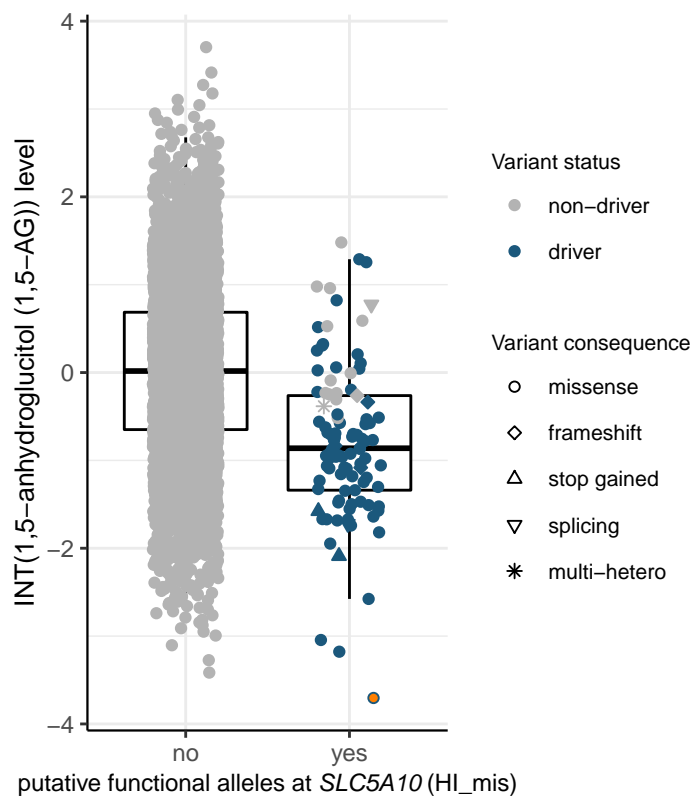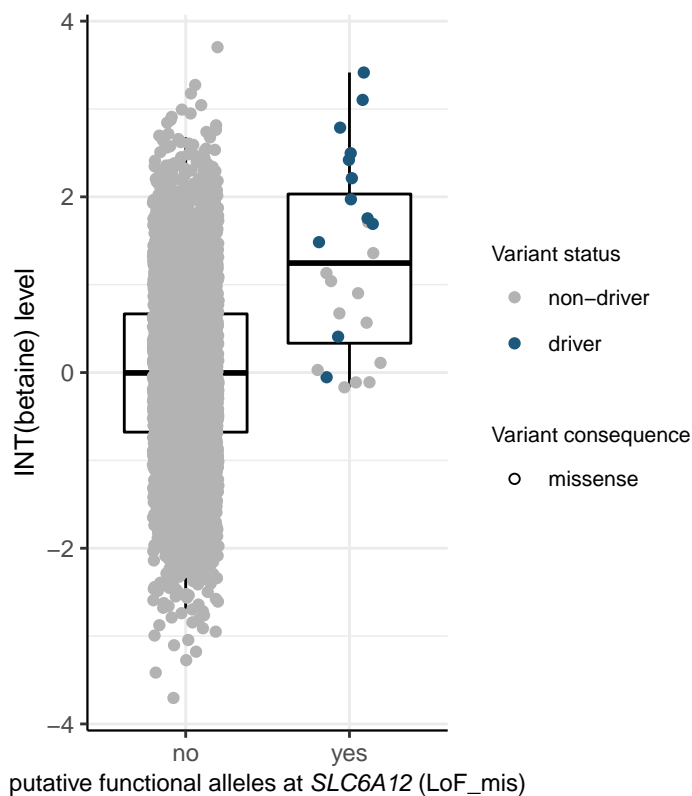

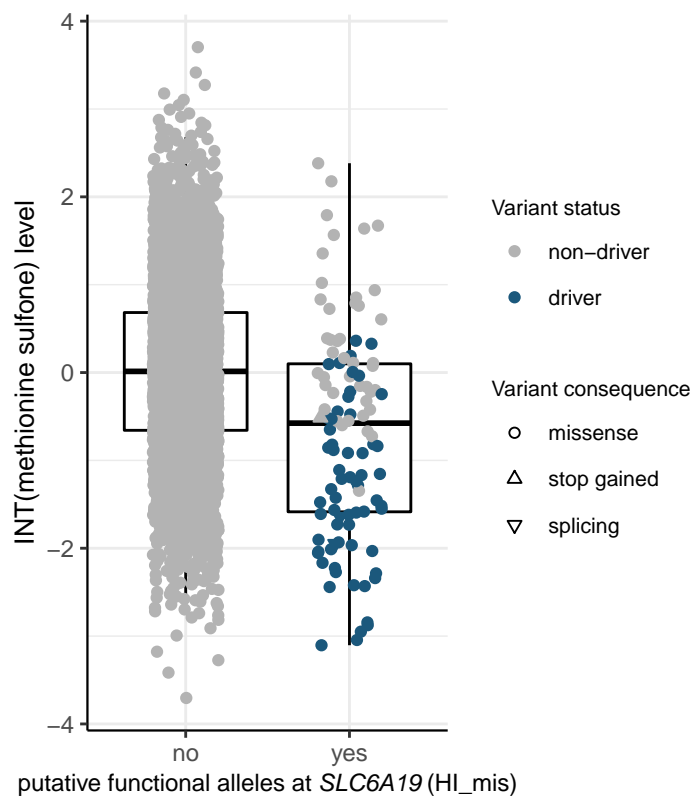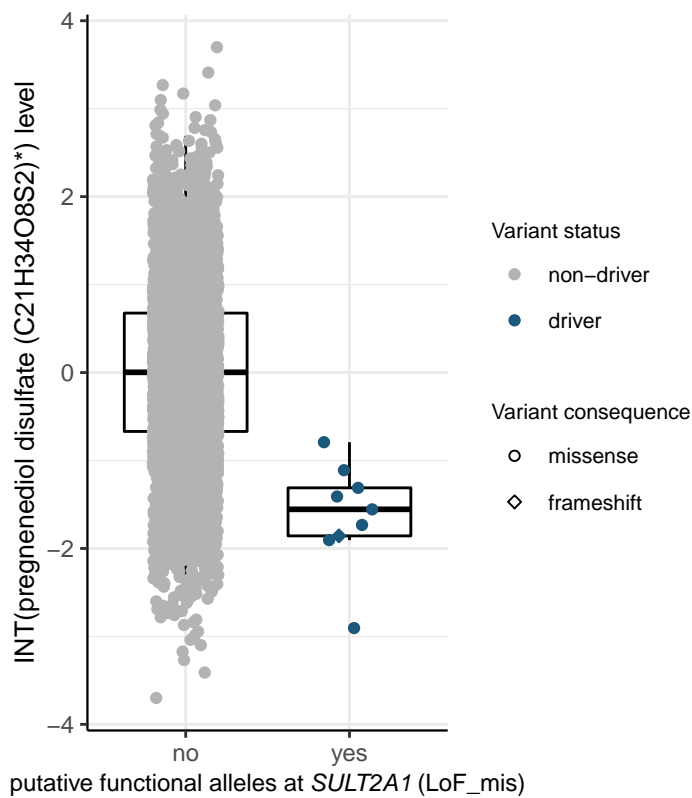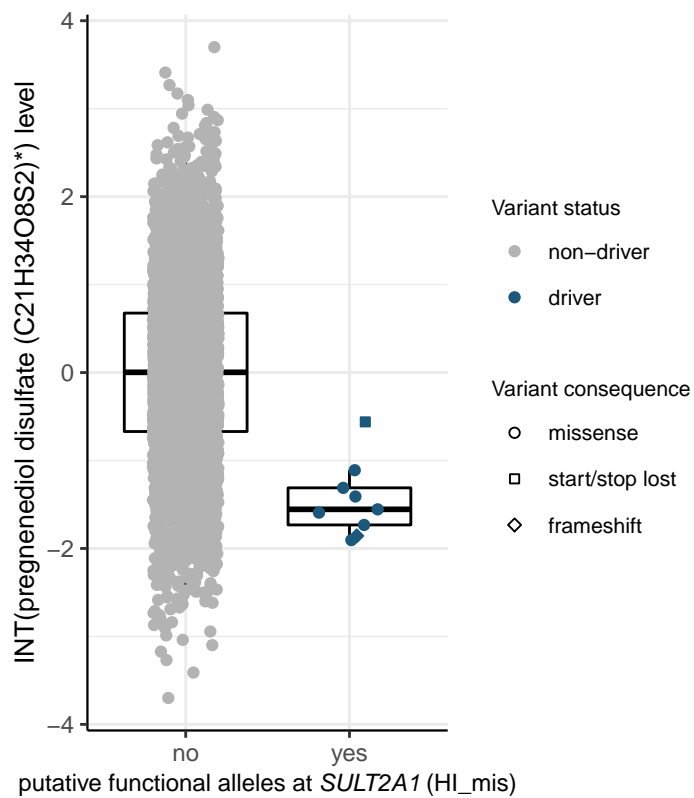

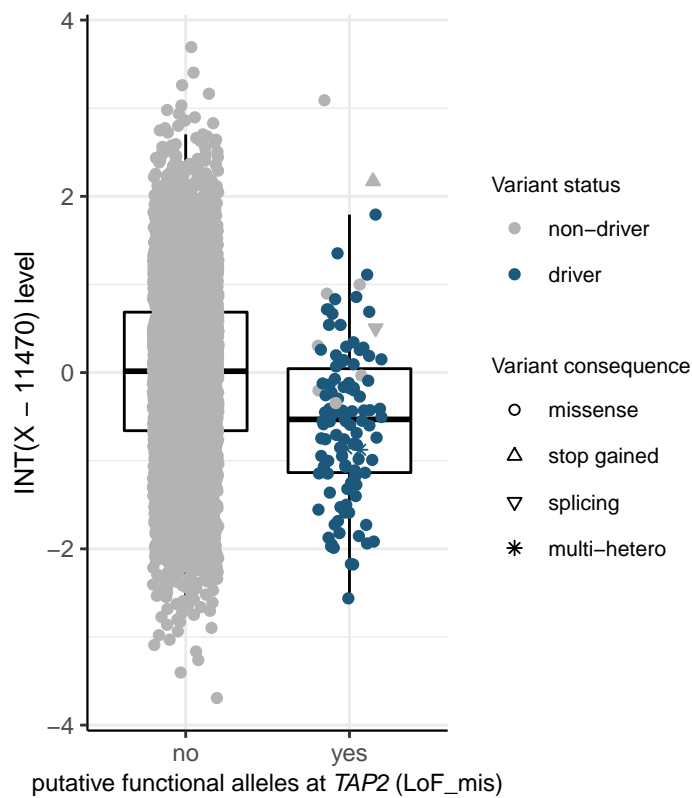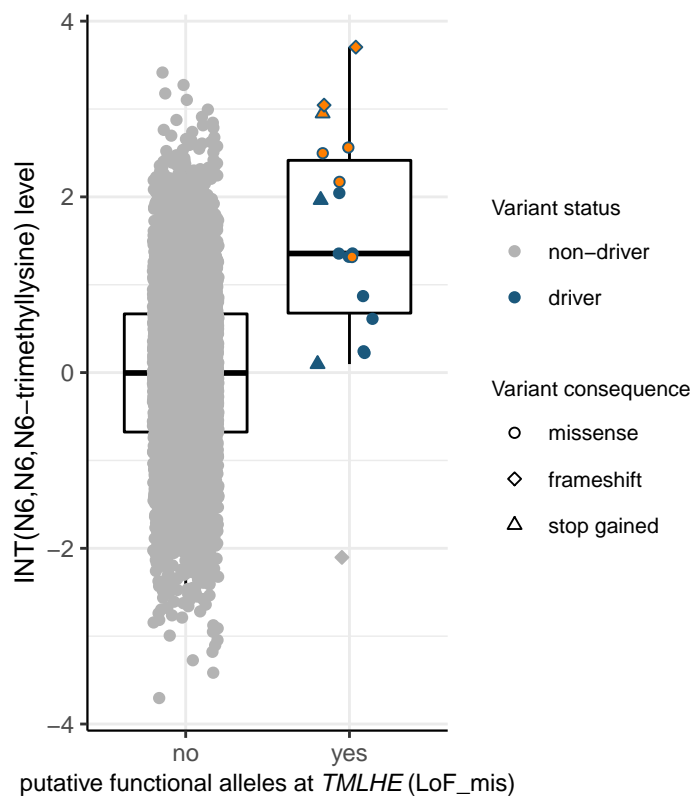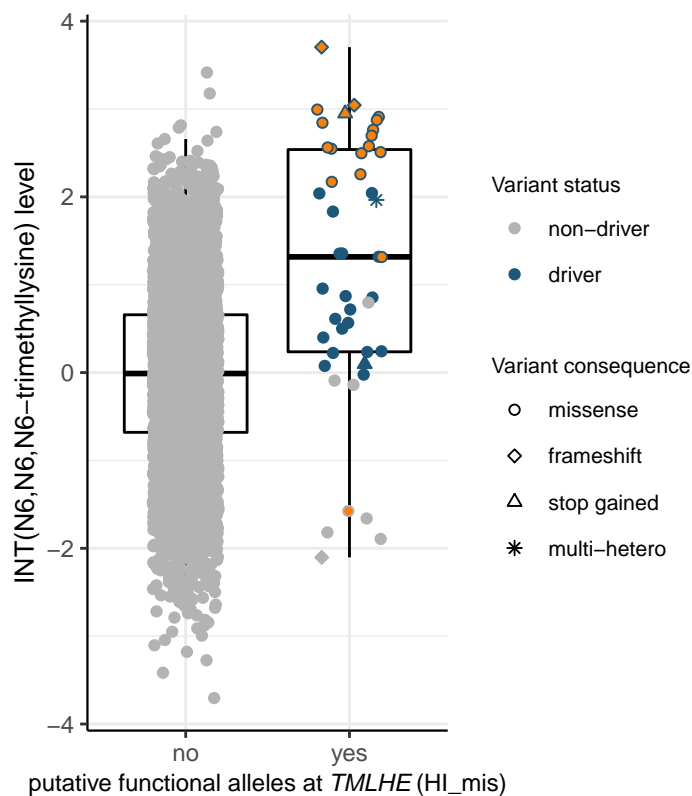

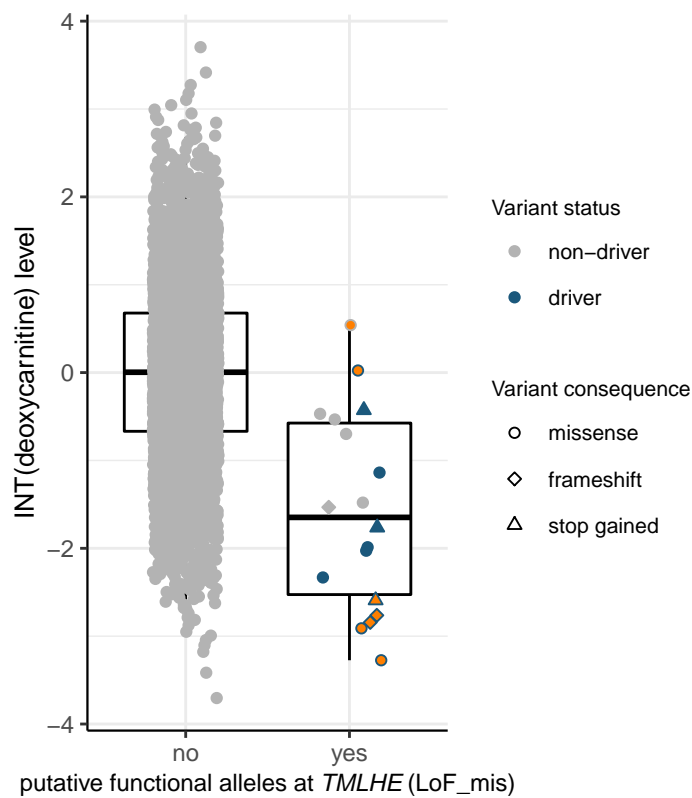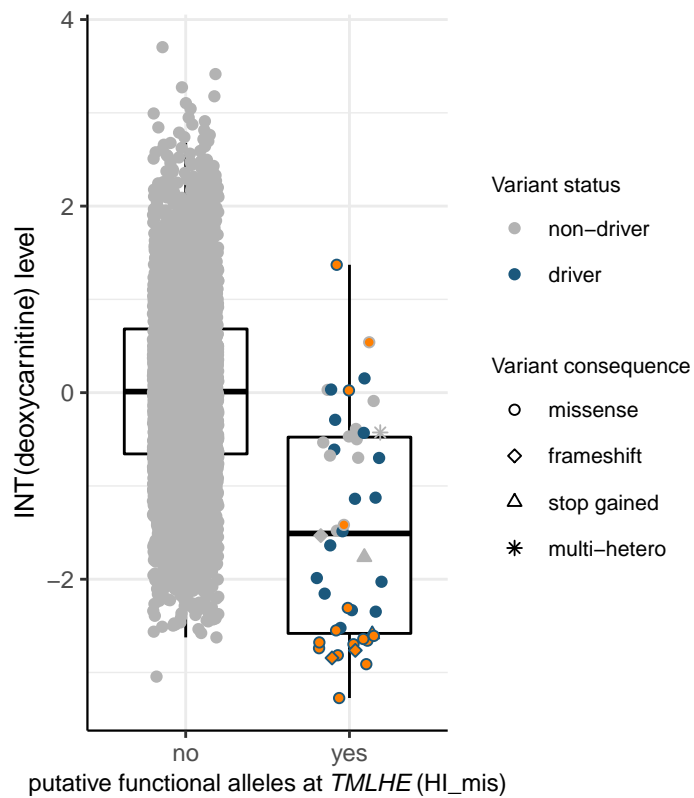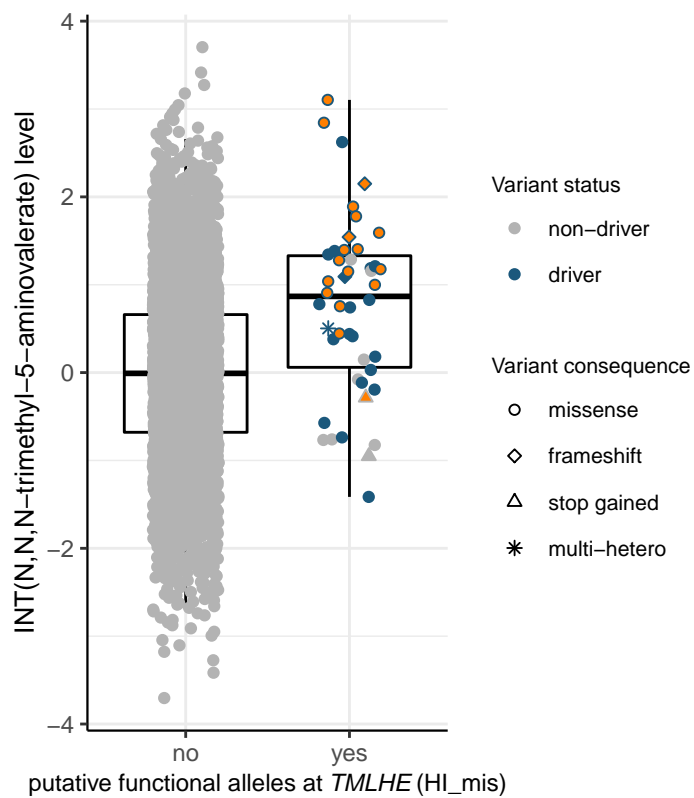

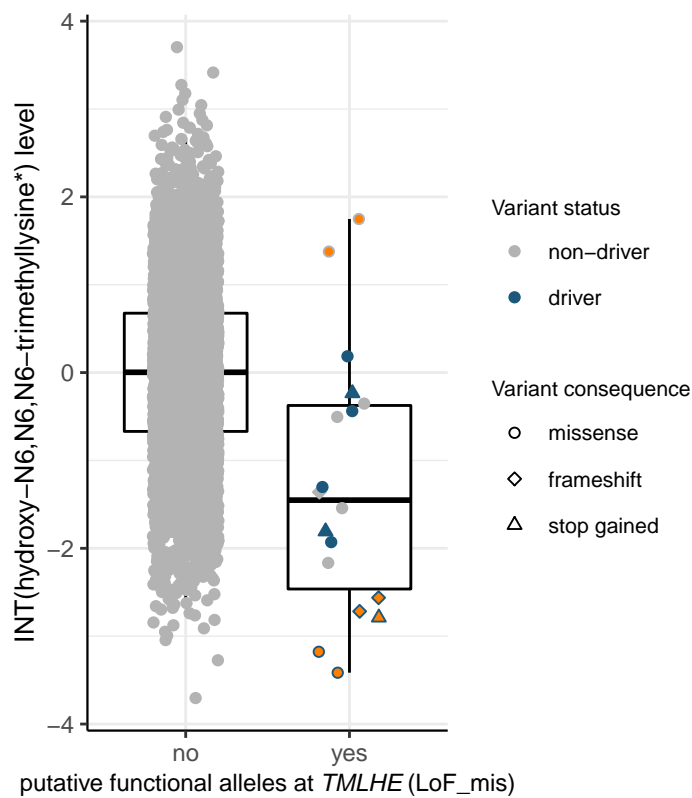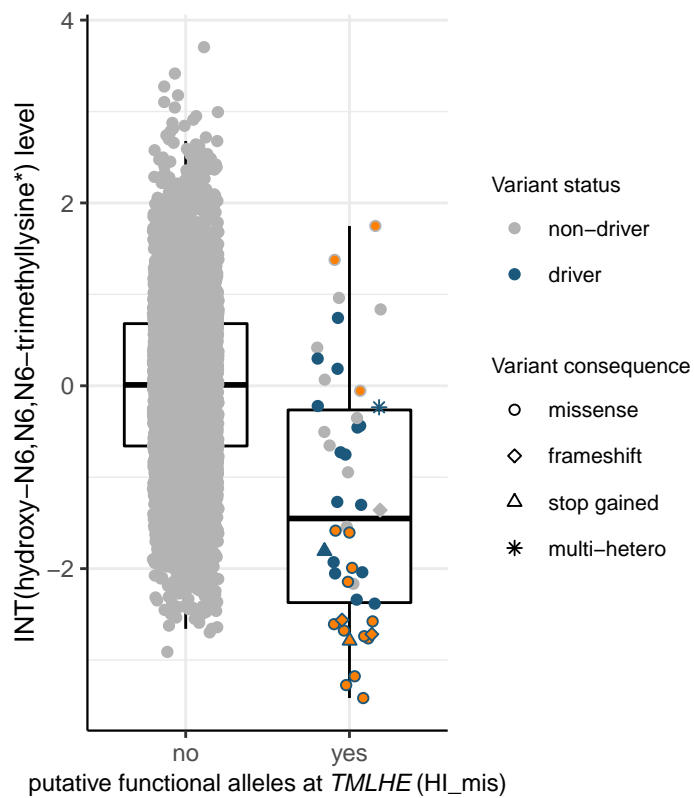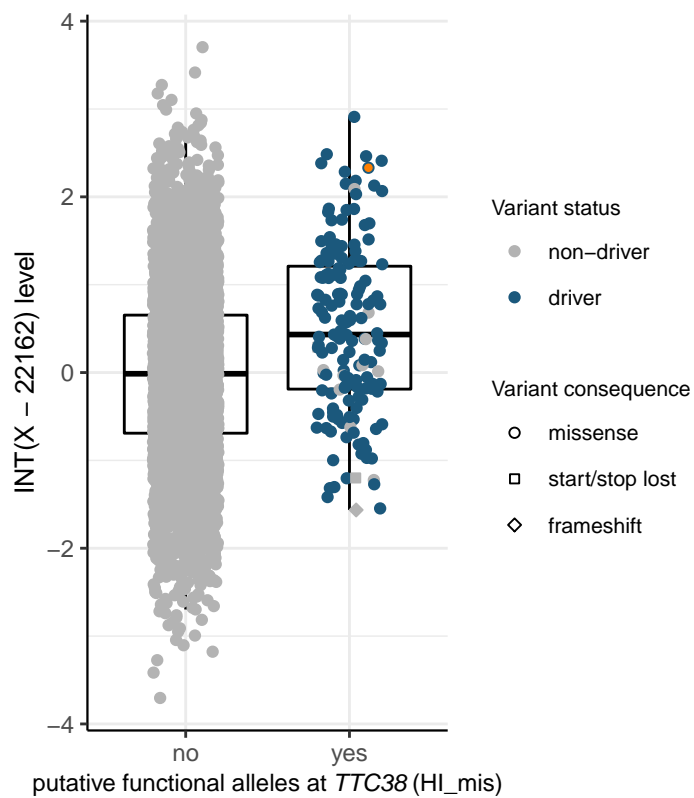

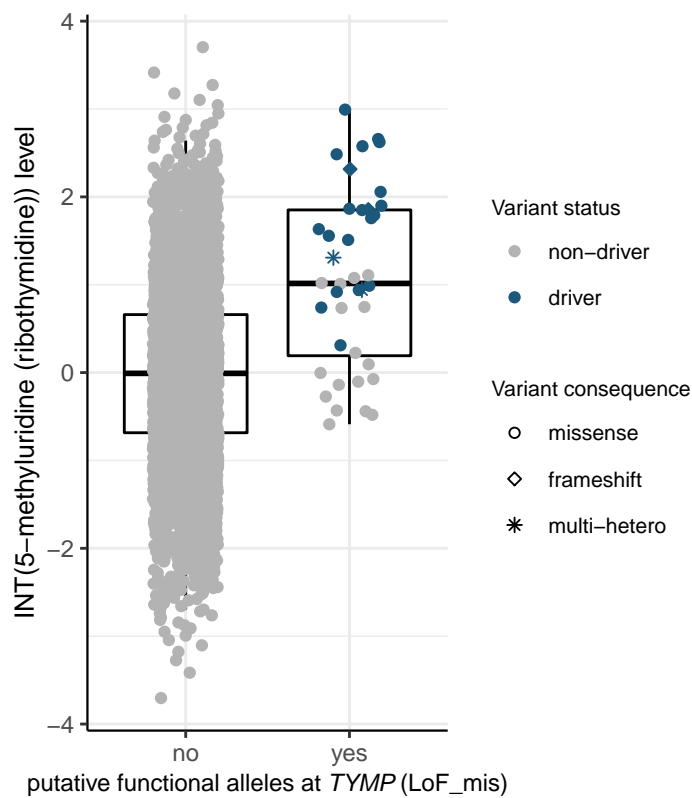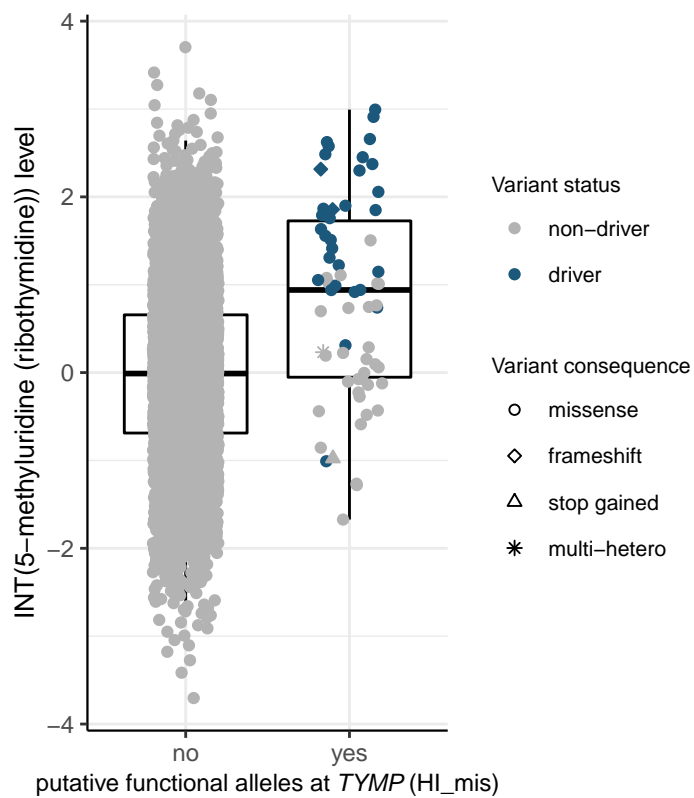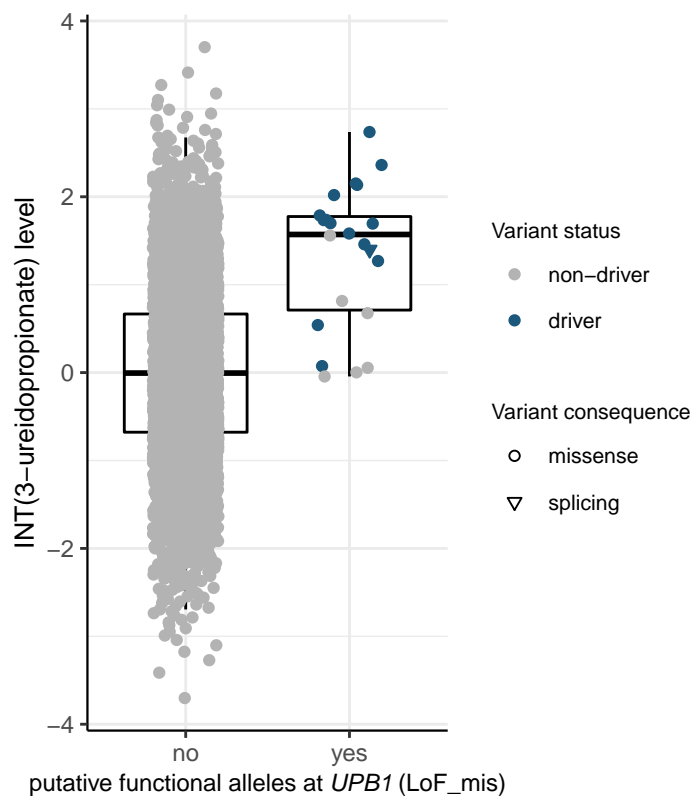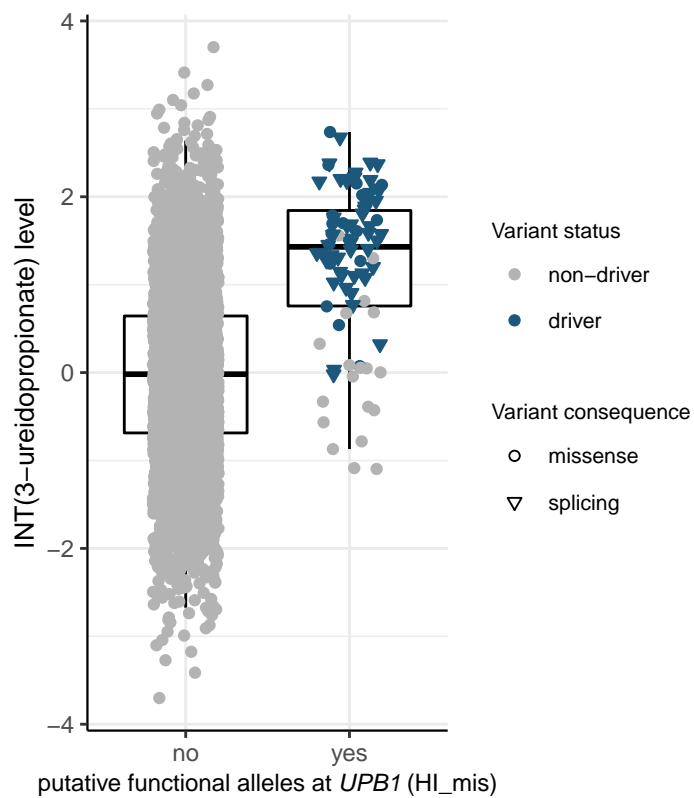

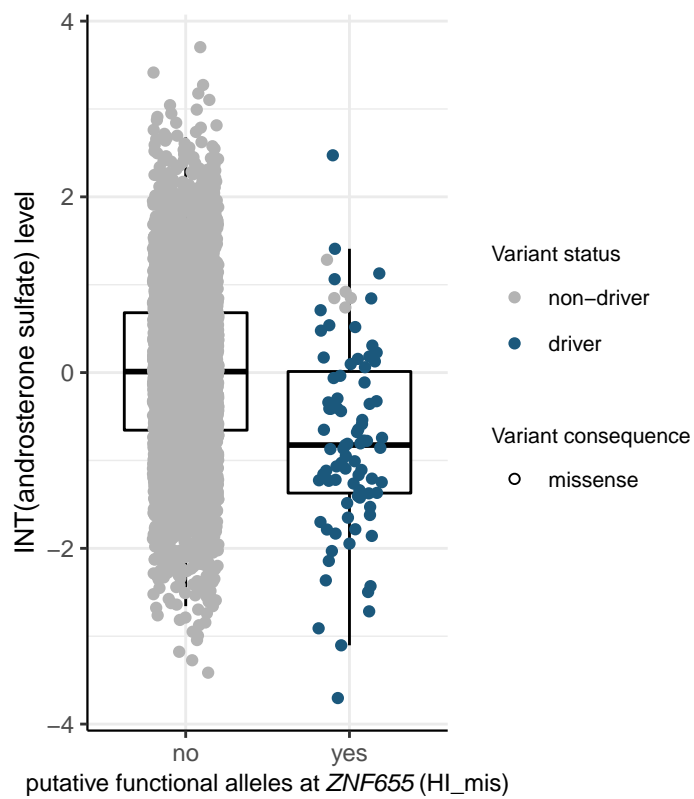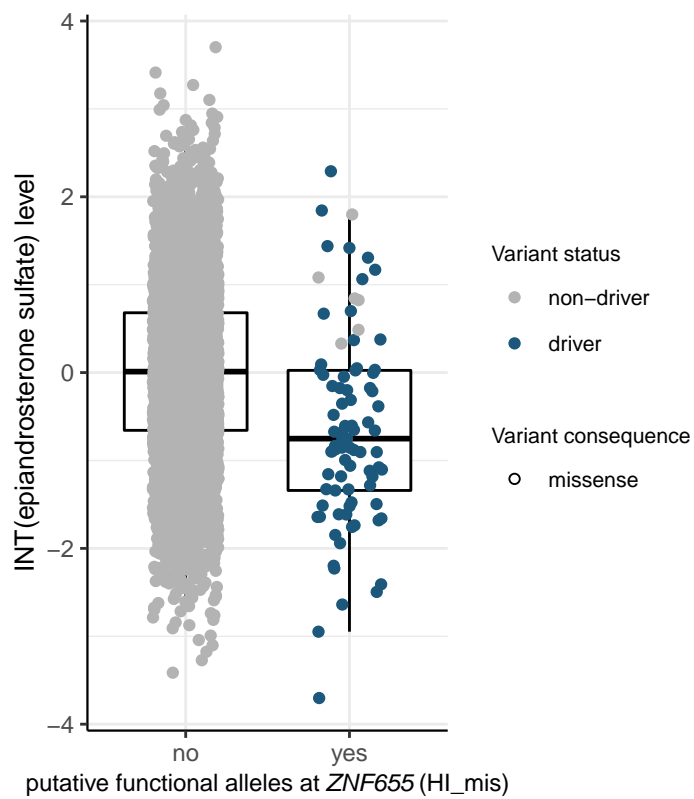

Supplement: Supplementary file [file media-3.pdf]
