# Supplementary material for: Coupling of metabolomics and exome sequencing reveals graded effects of rare damaging heterozygous variants on gene function and resulting traits and diseases
Source: bioRxiv or medRxiv preprint supplement (doi:10.1101/2023.10.17.23297094), 2023-10-19

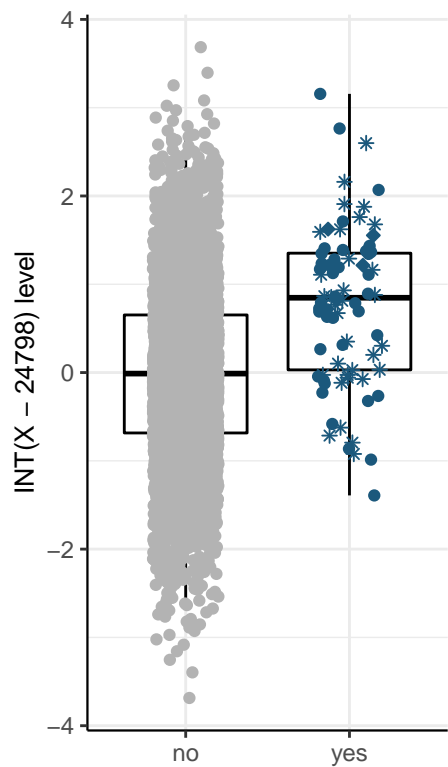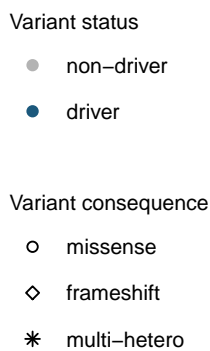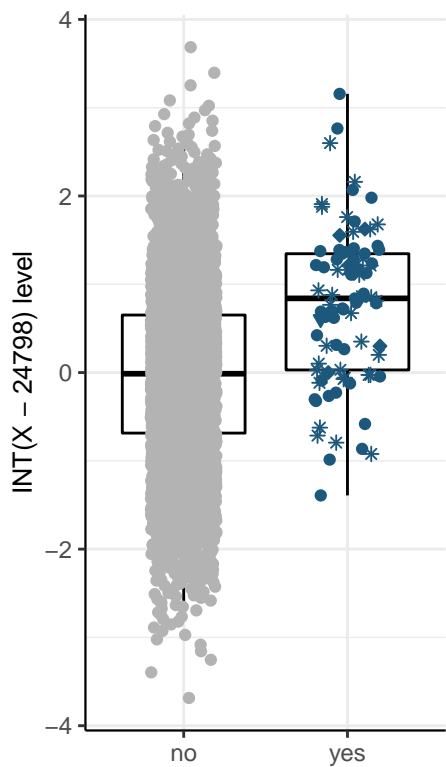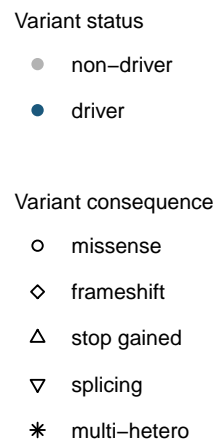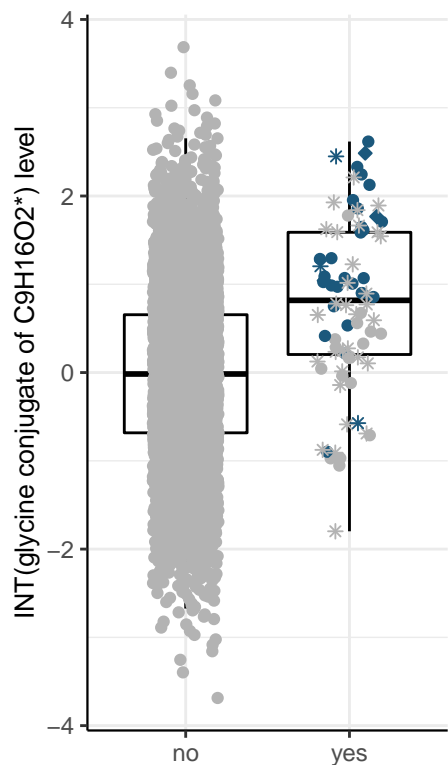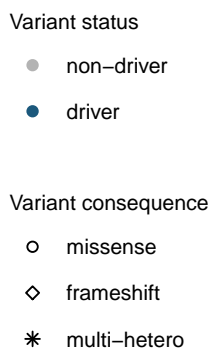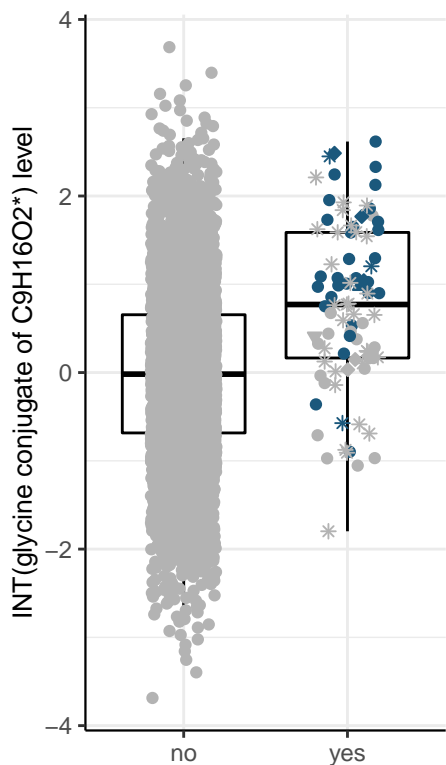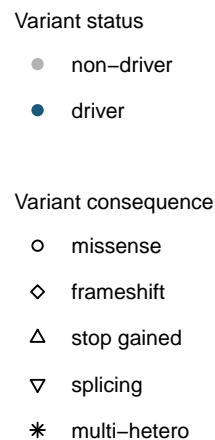

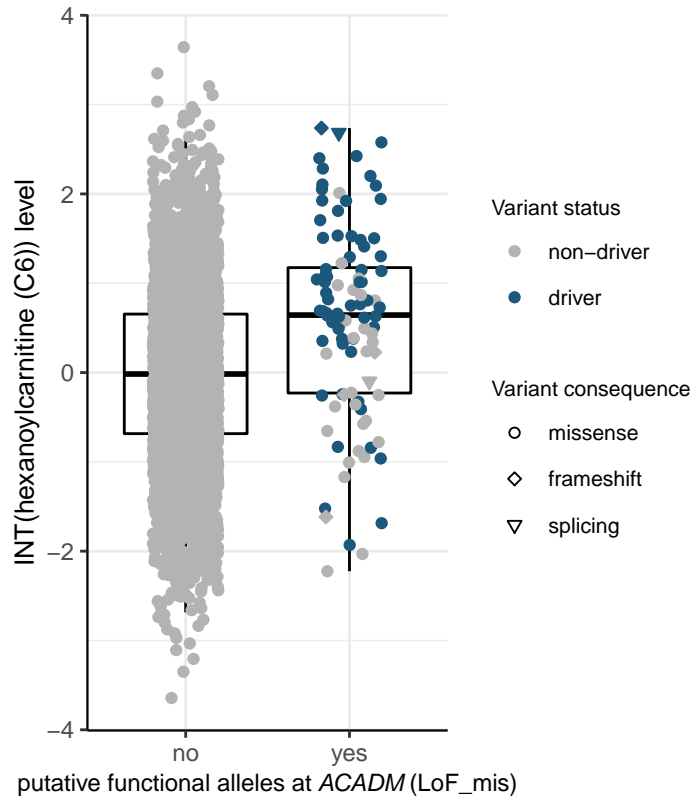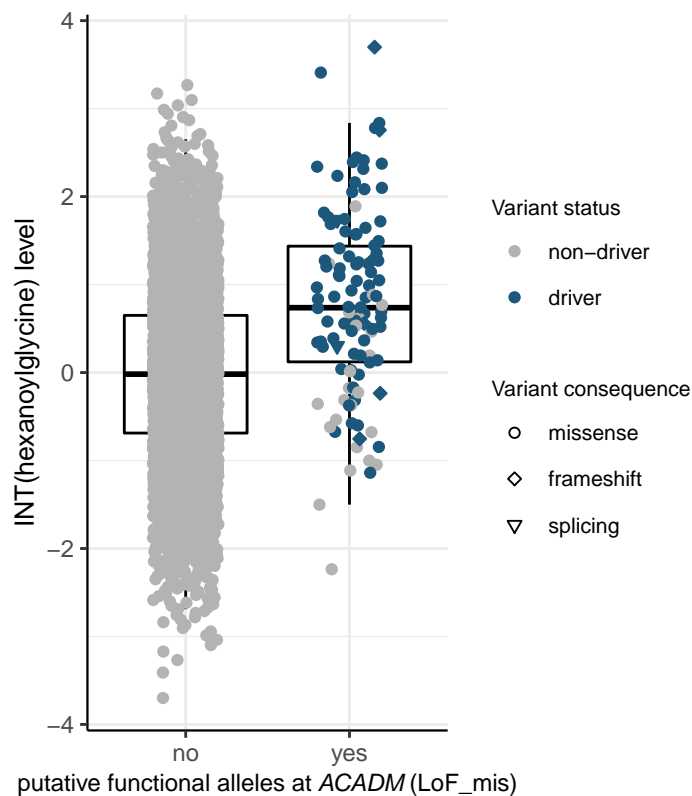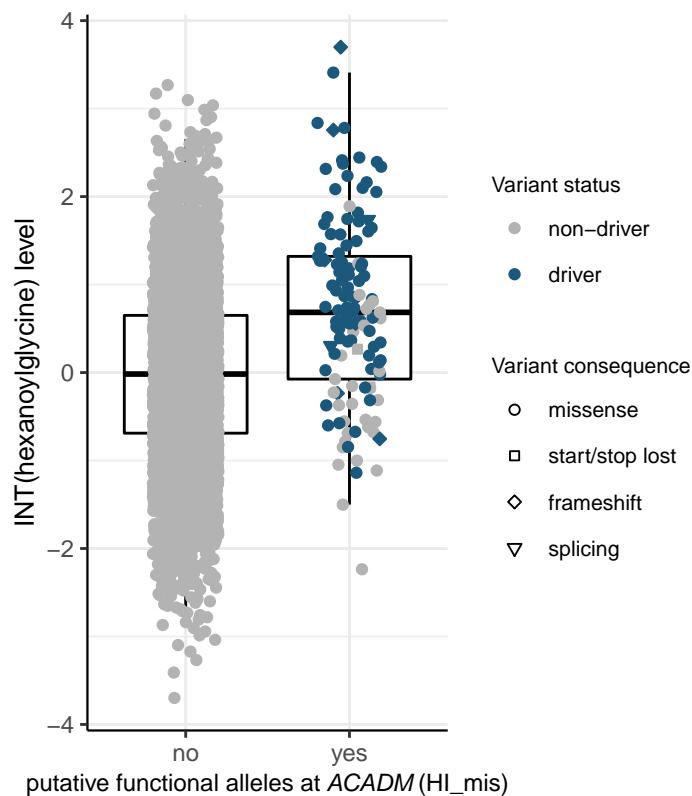

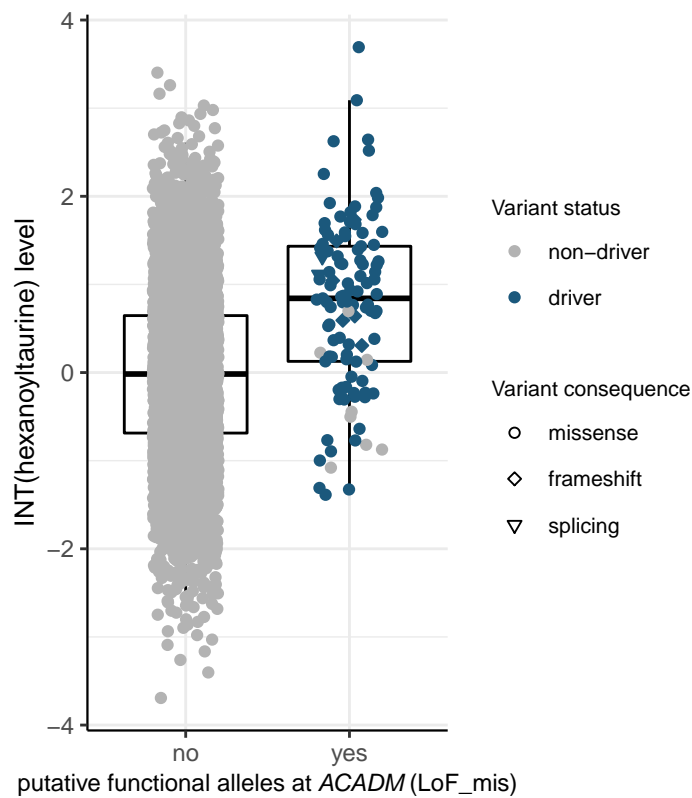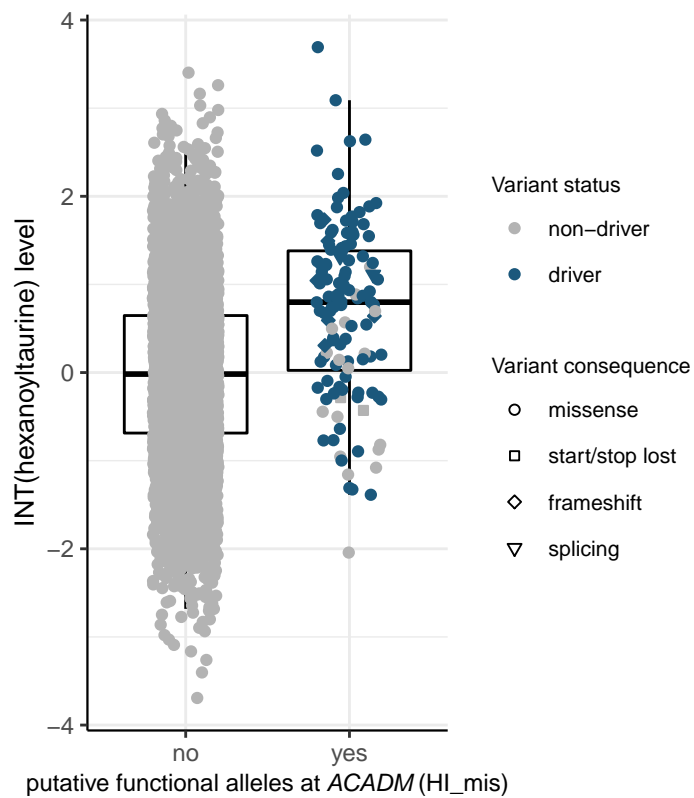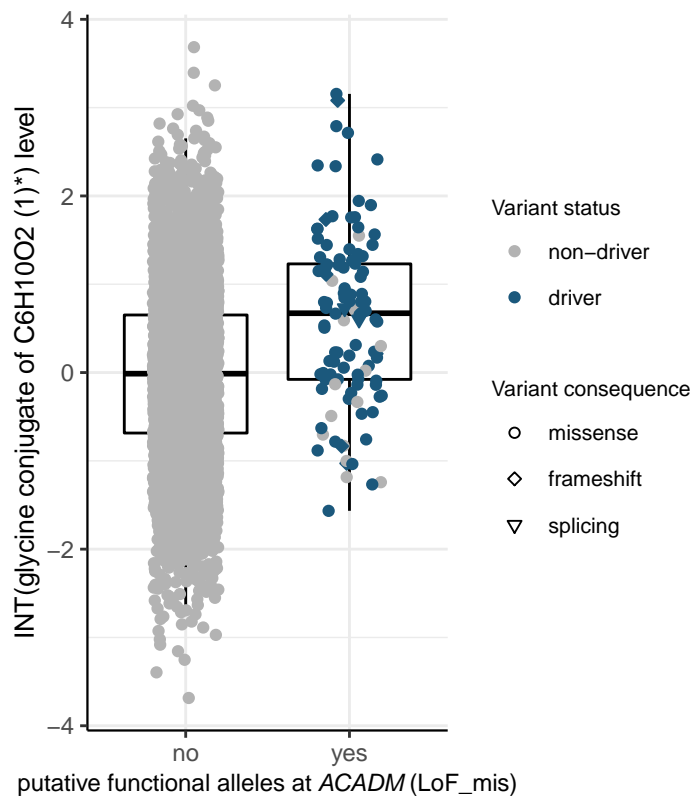

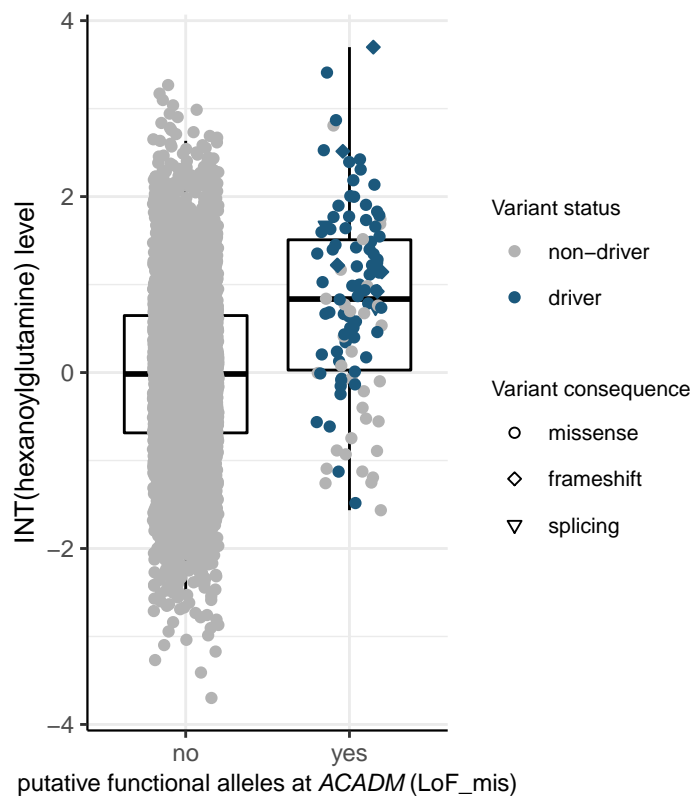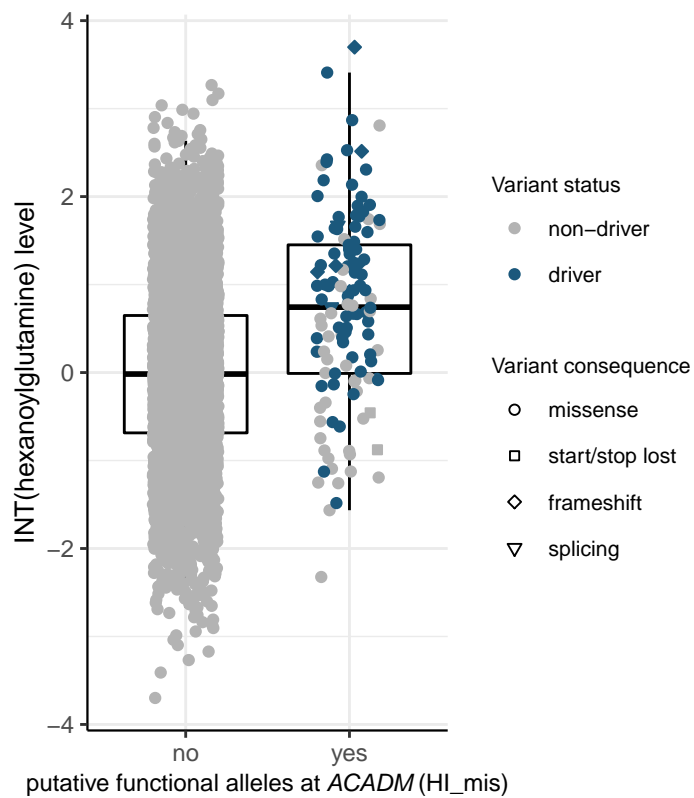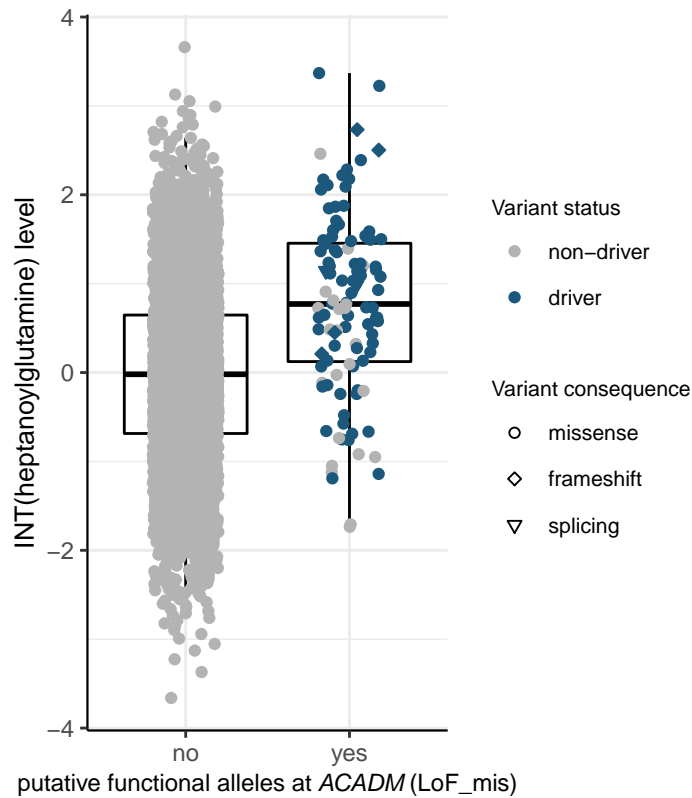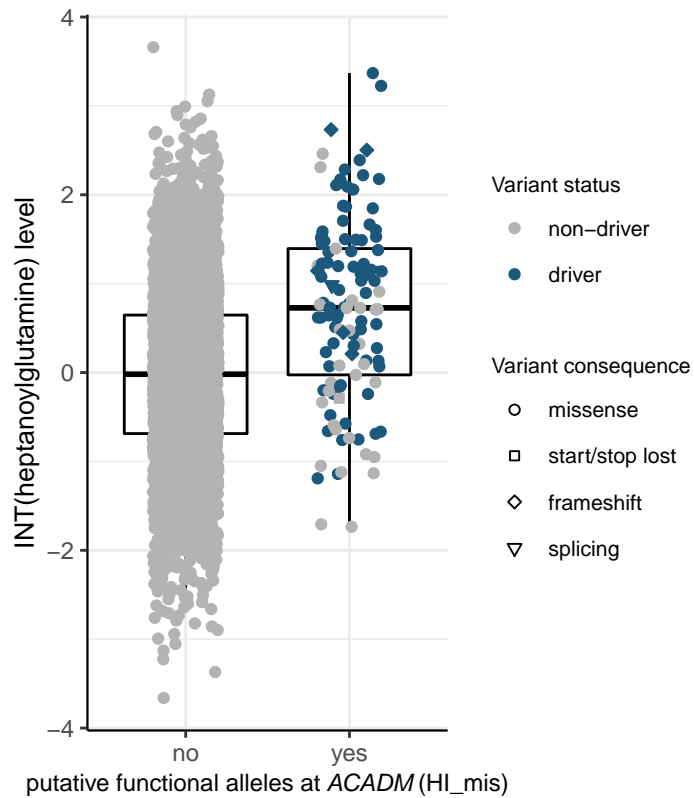

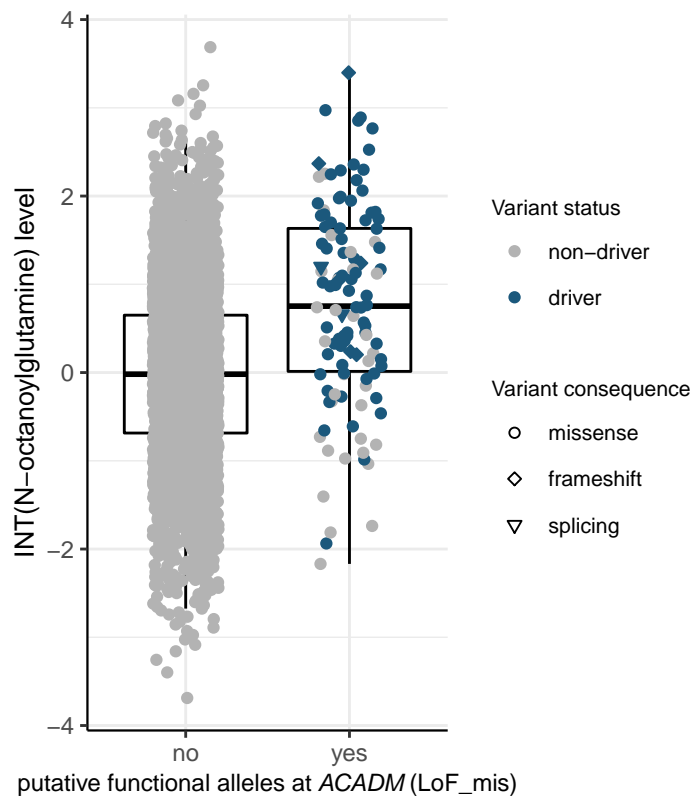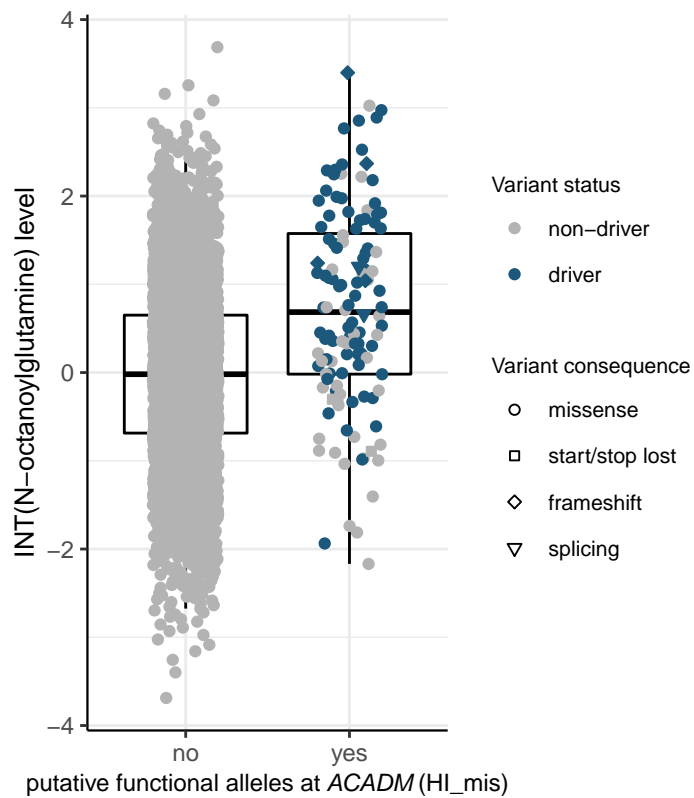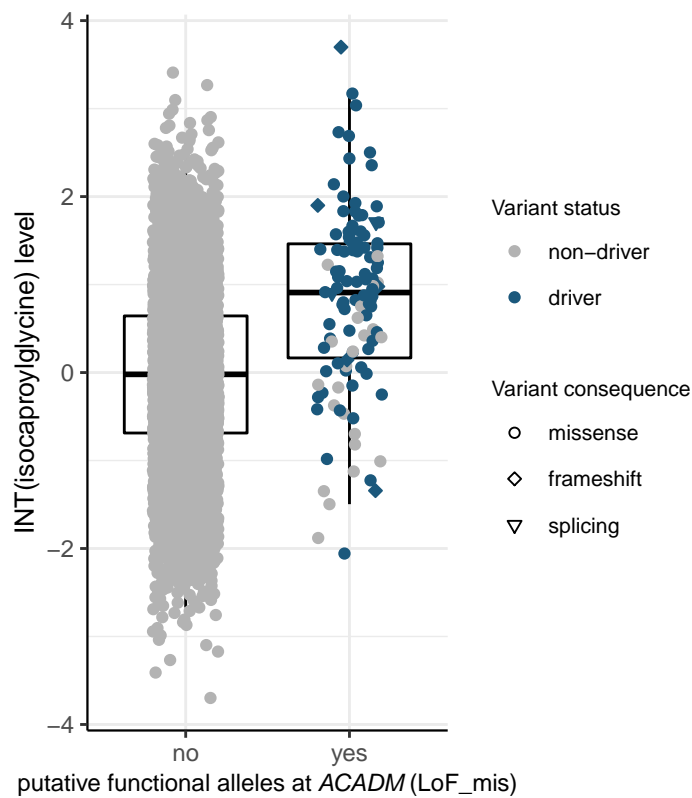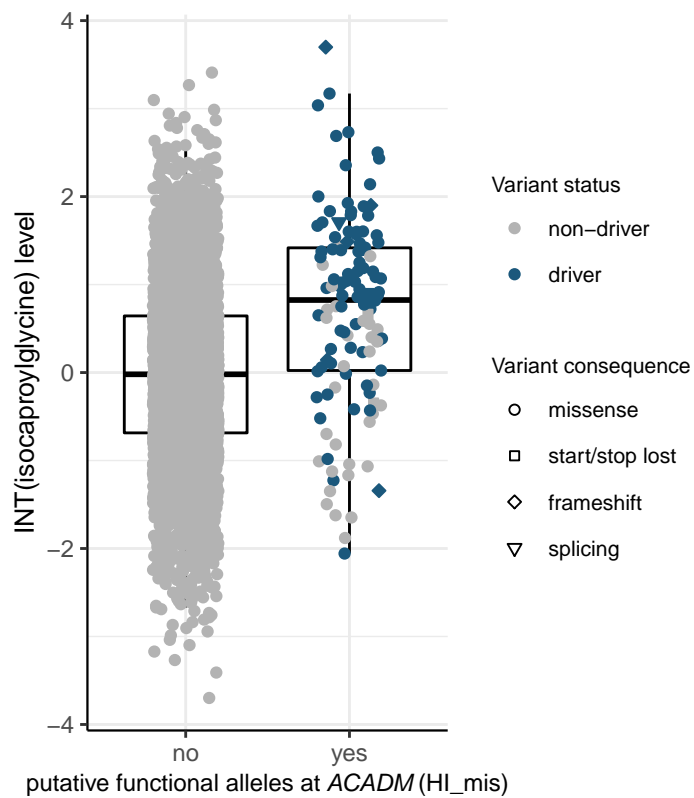

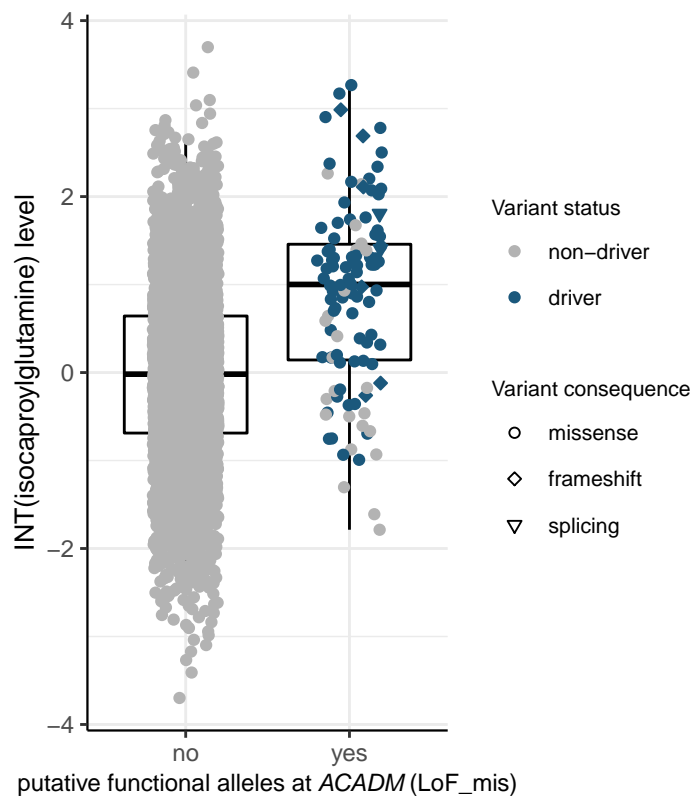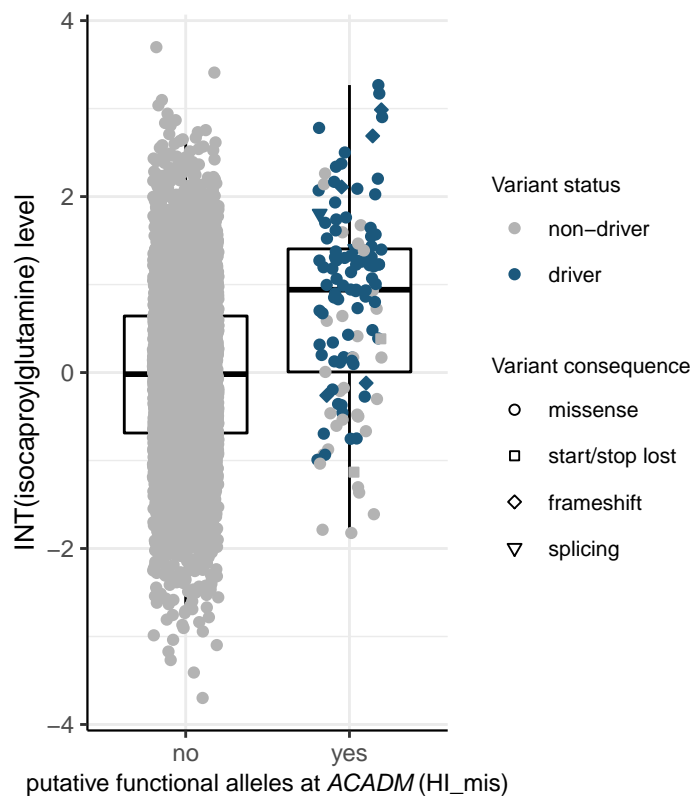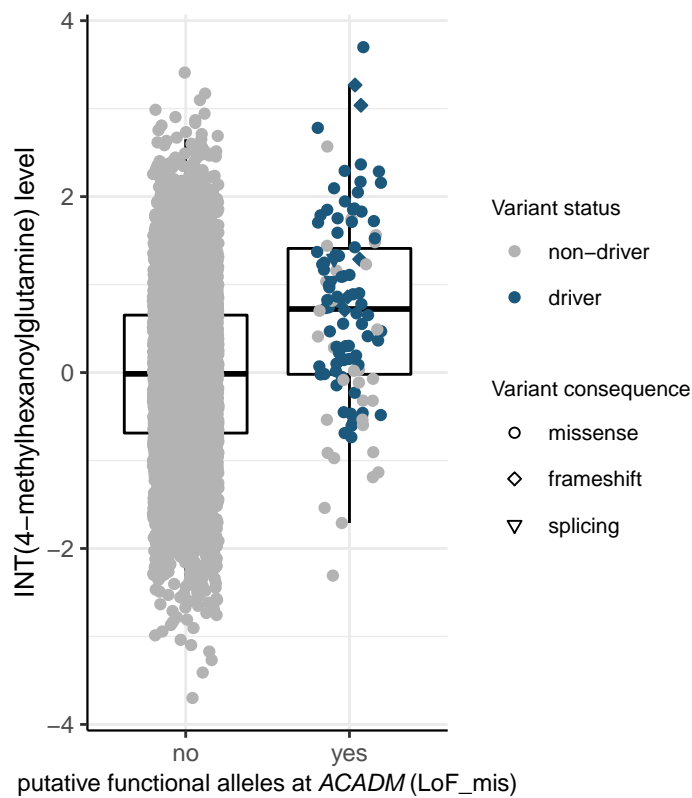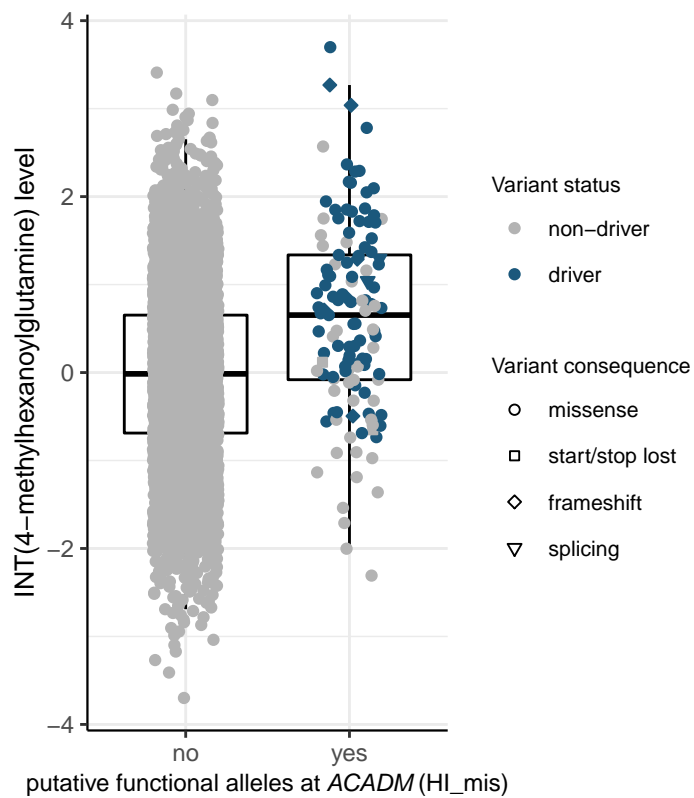

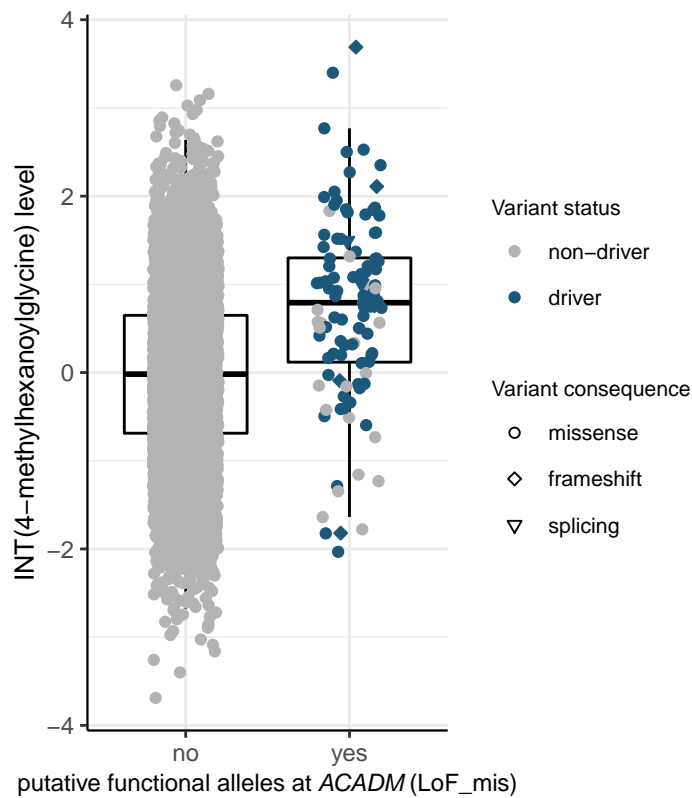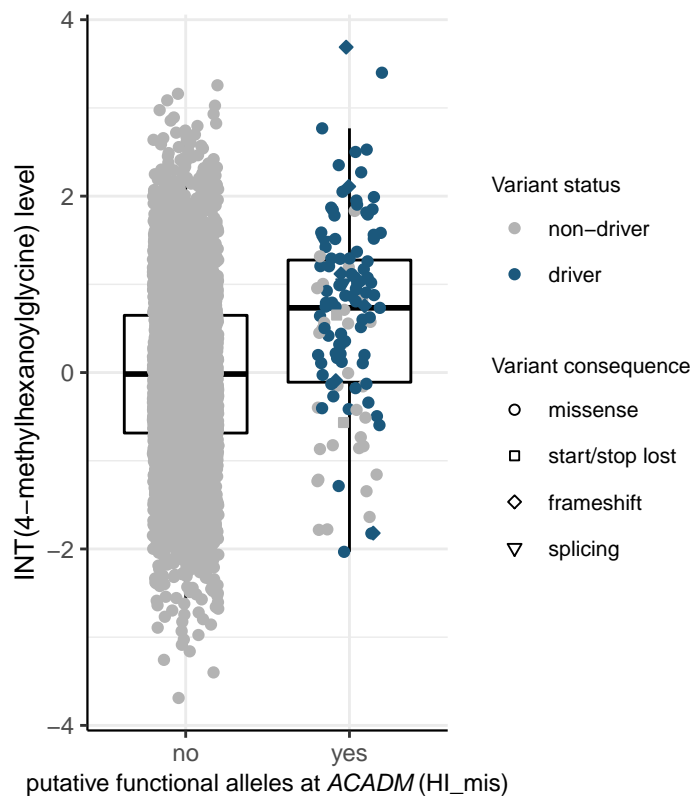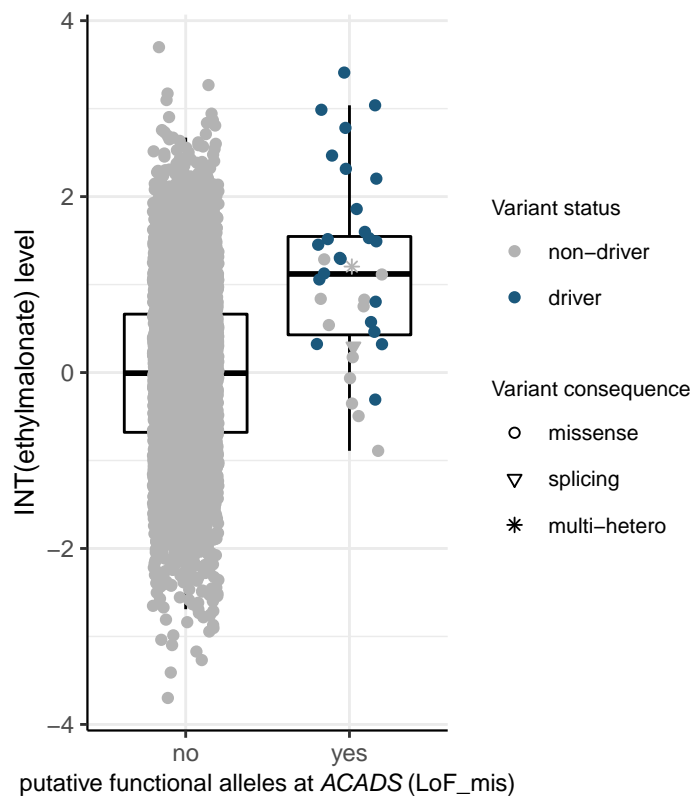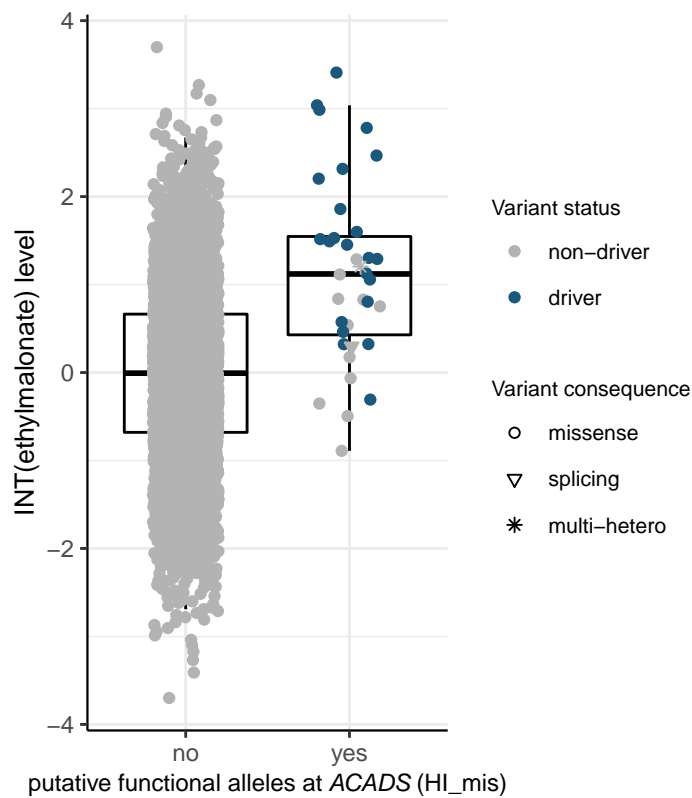

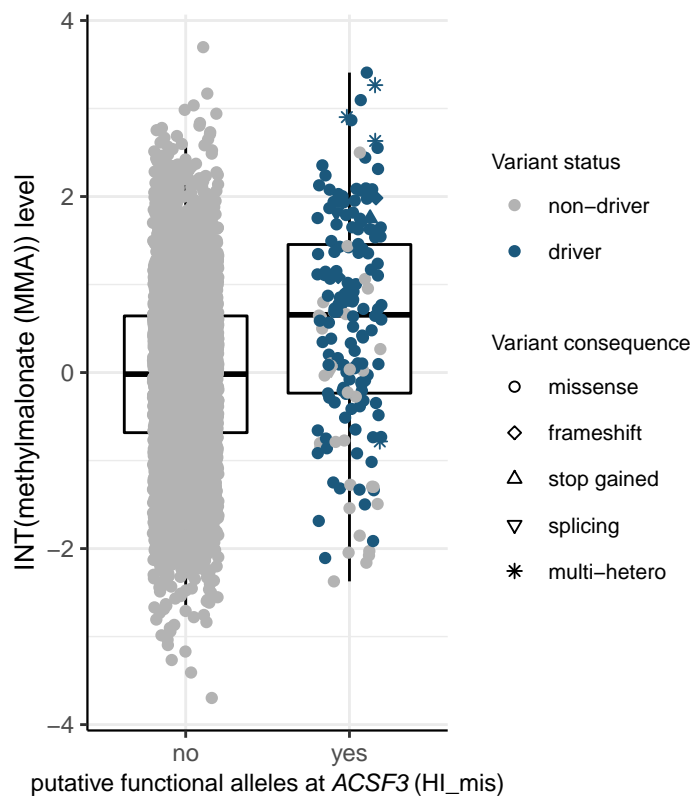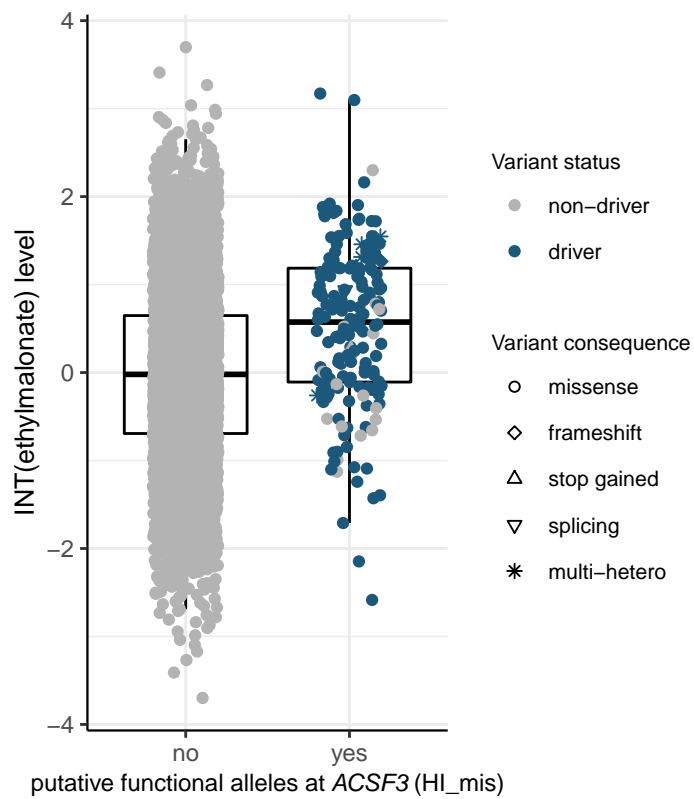



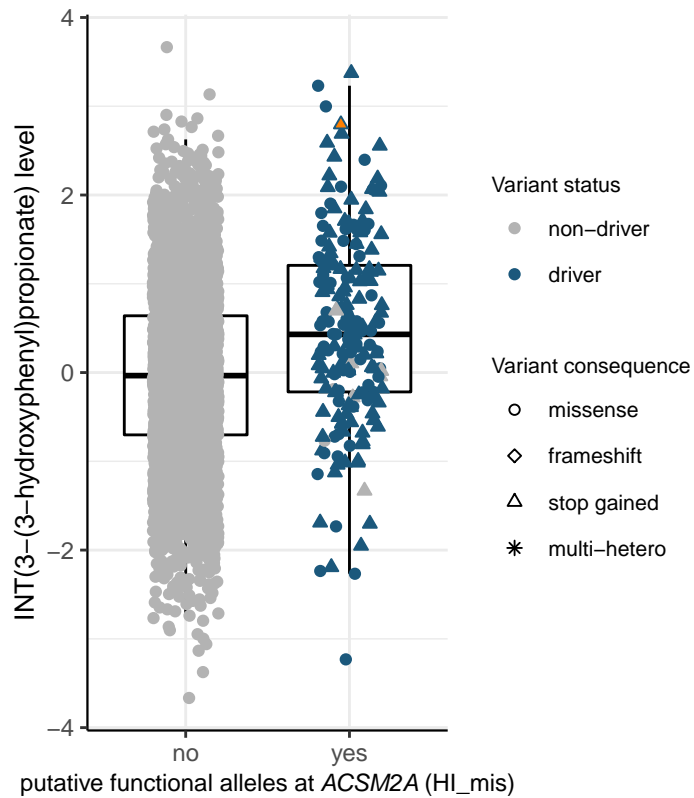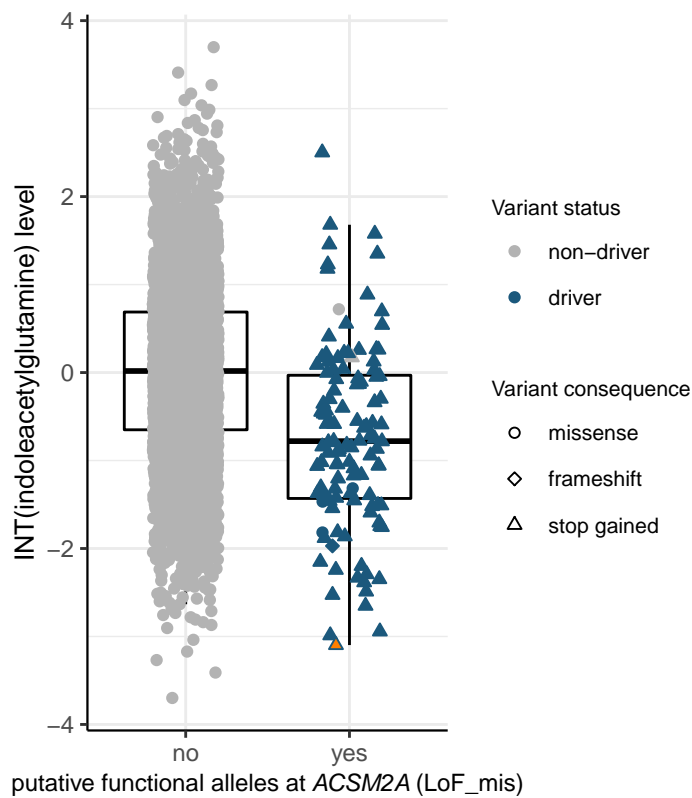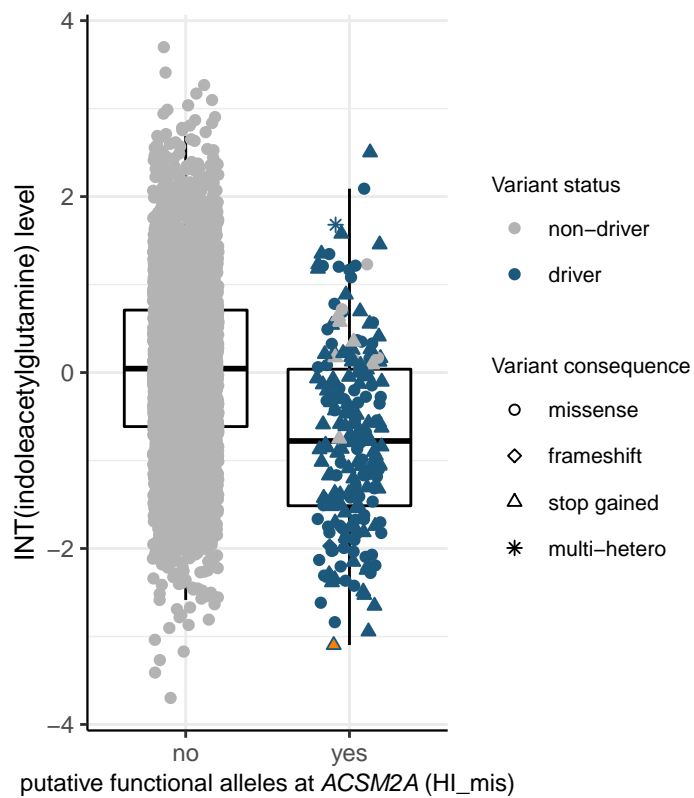

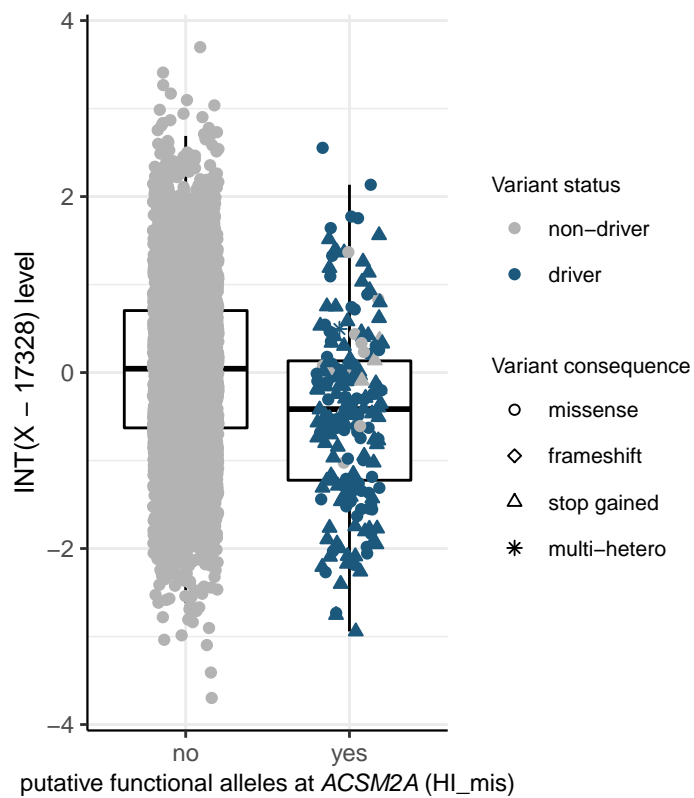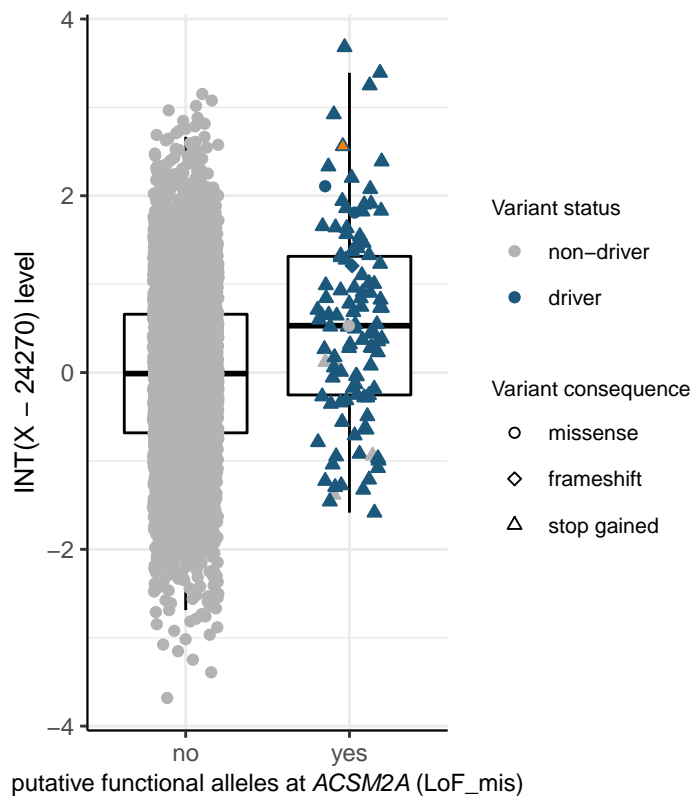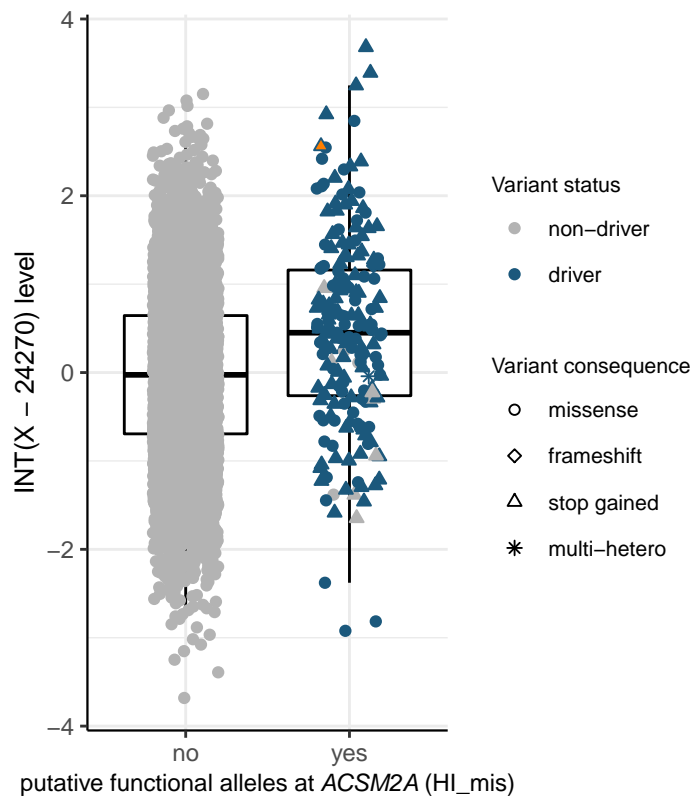

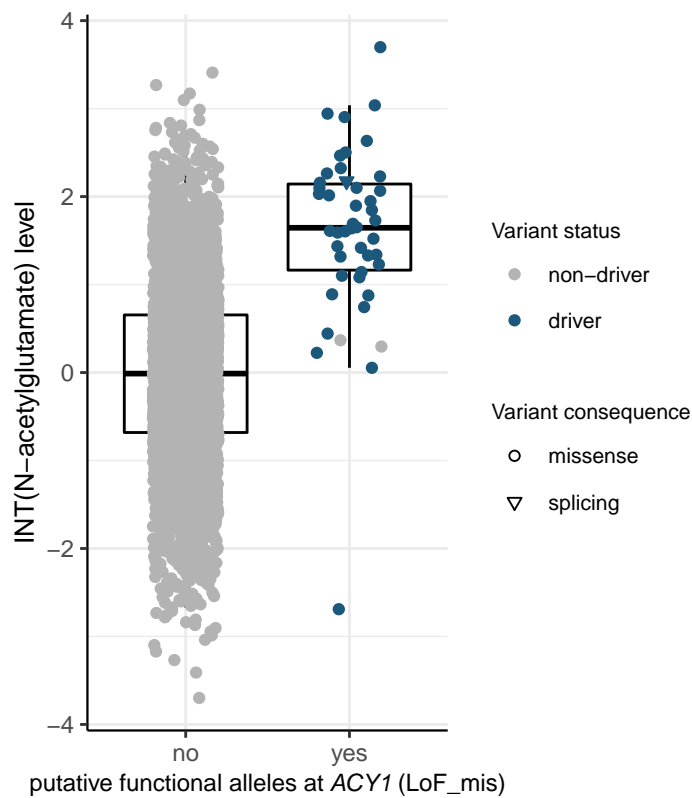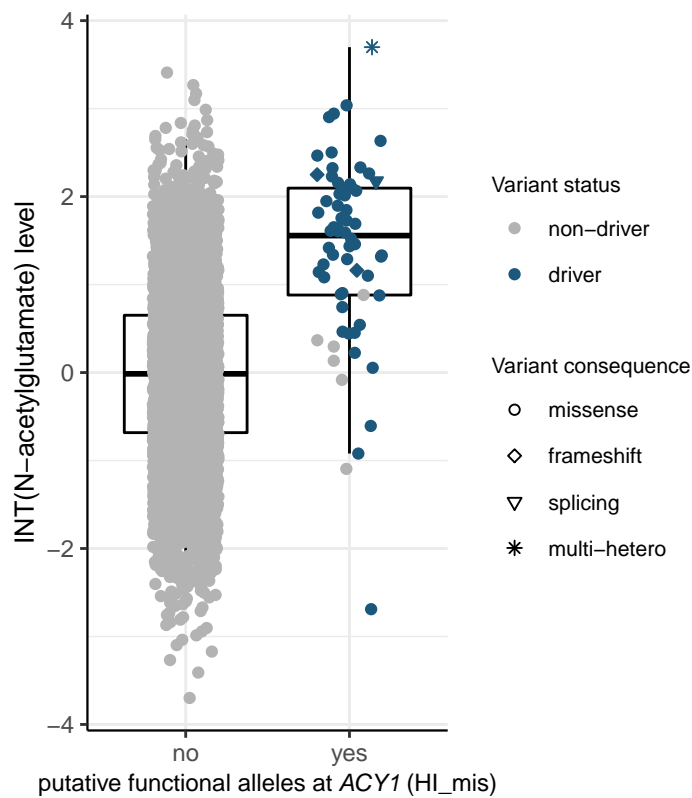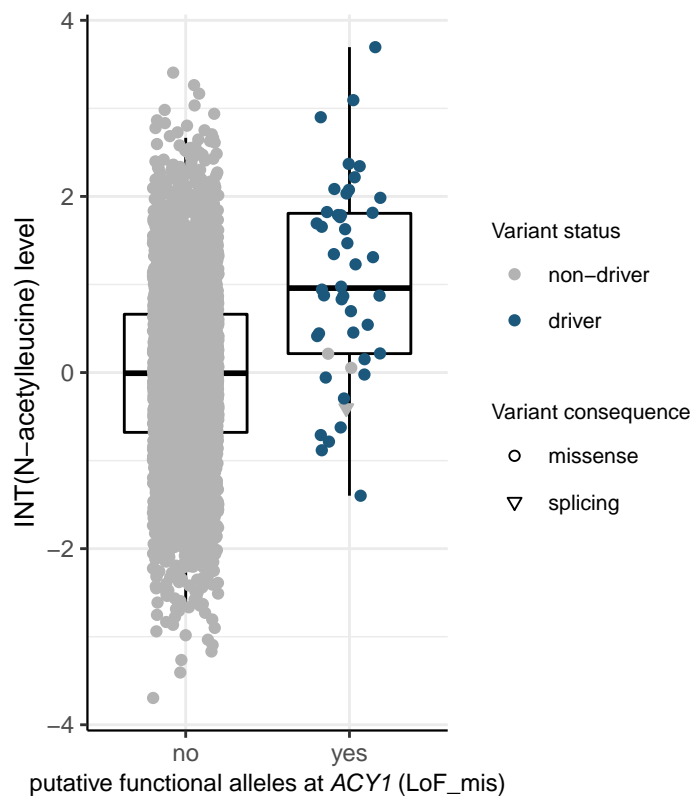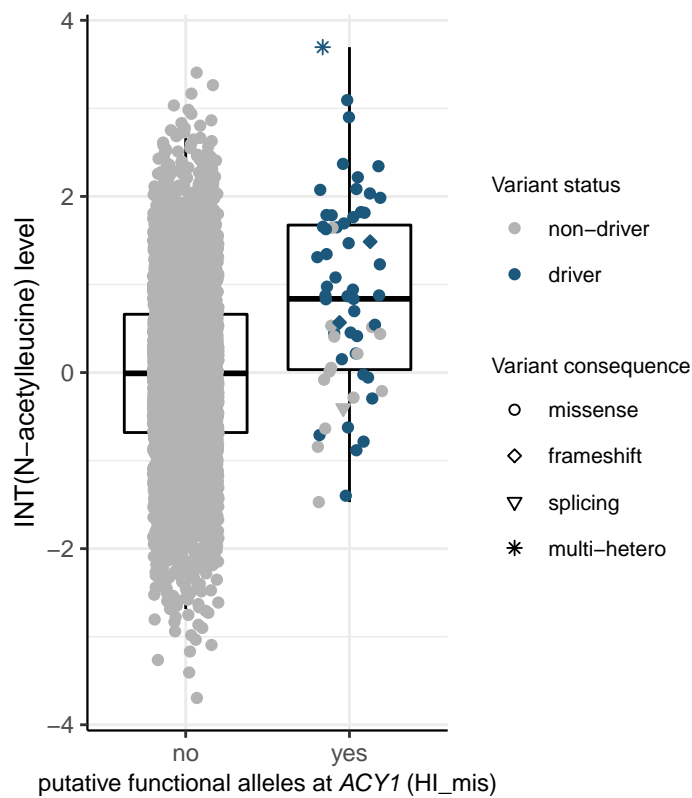

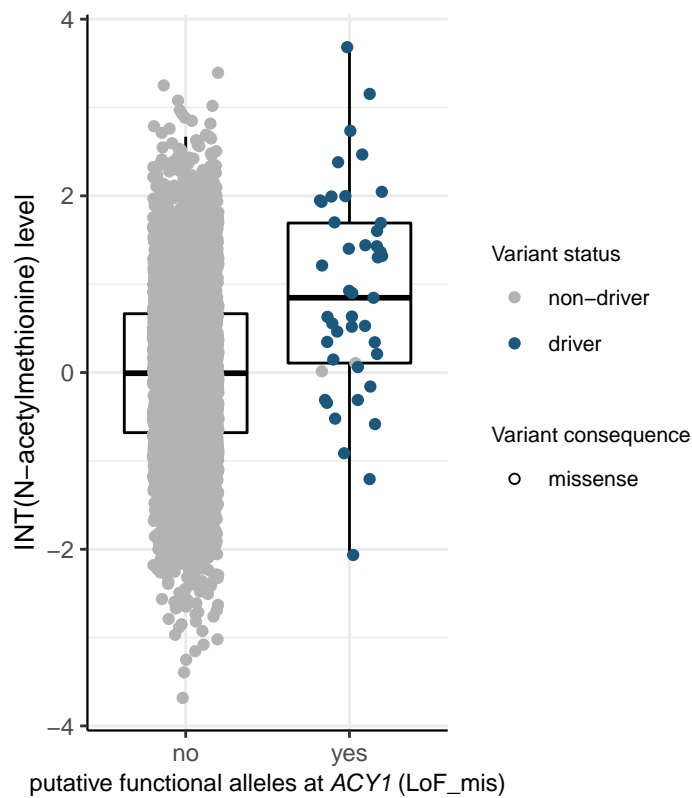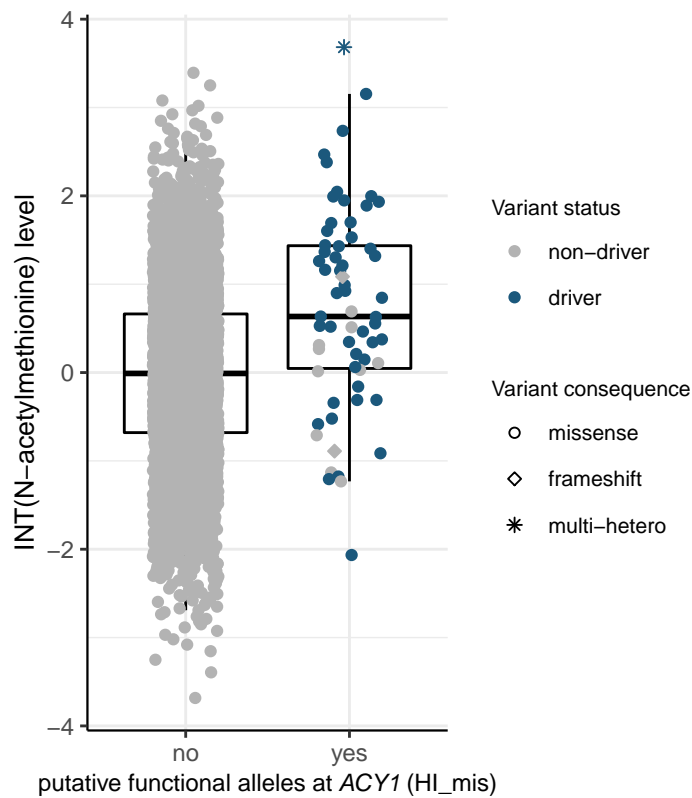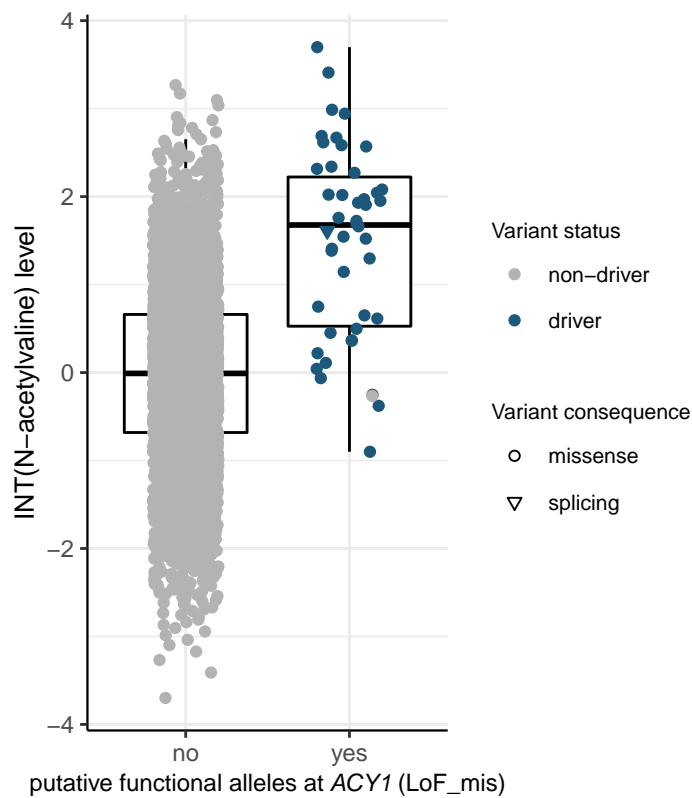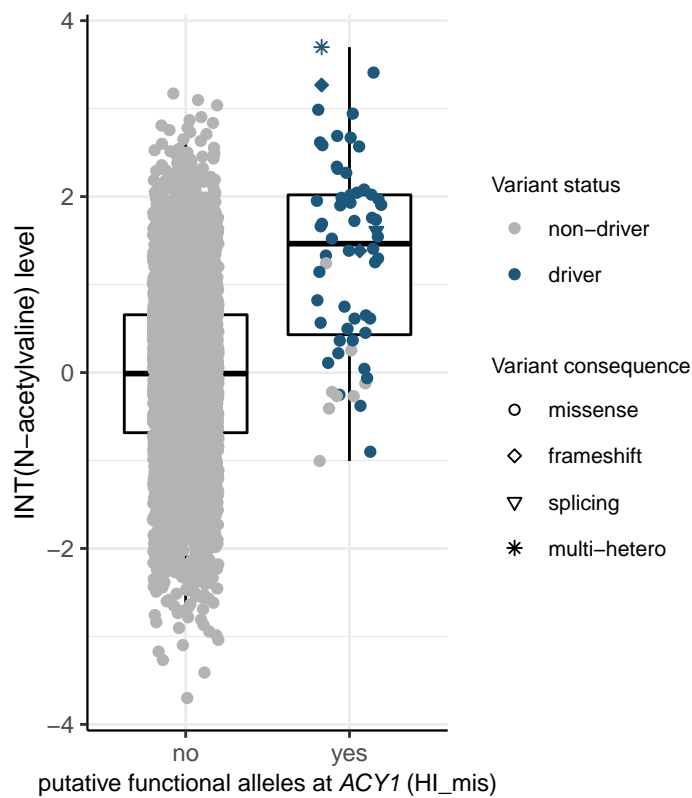

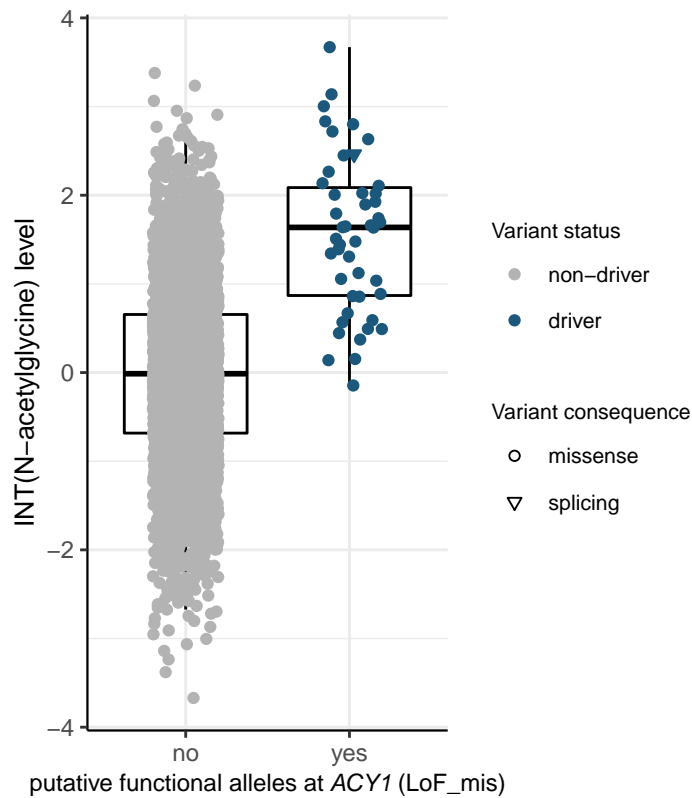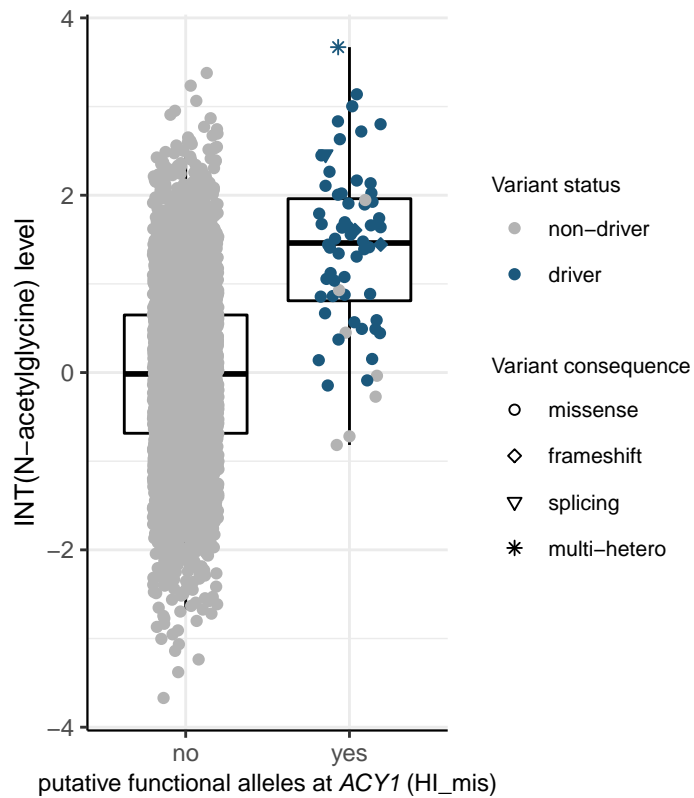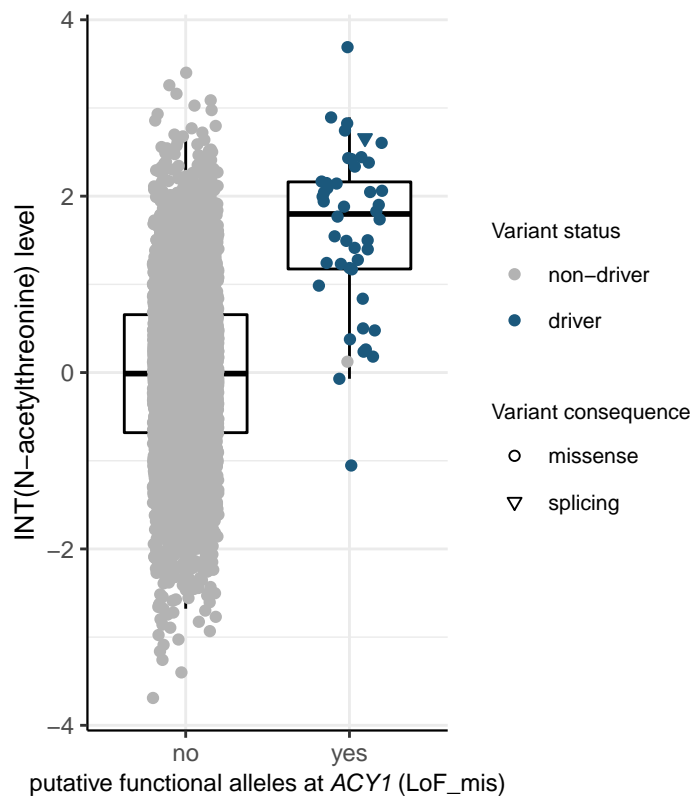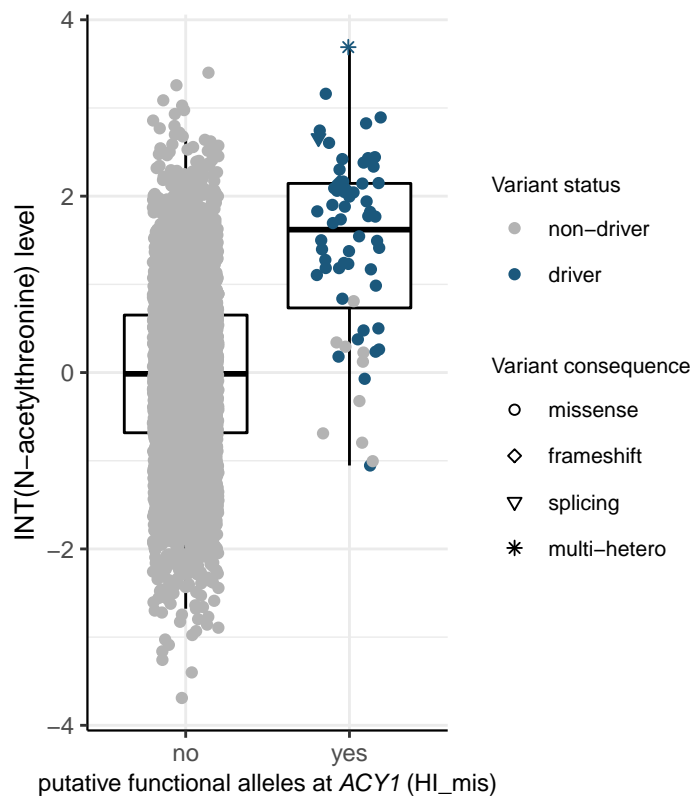

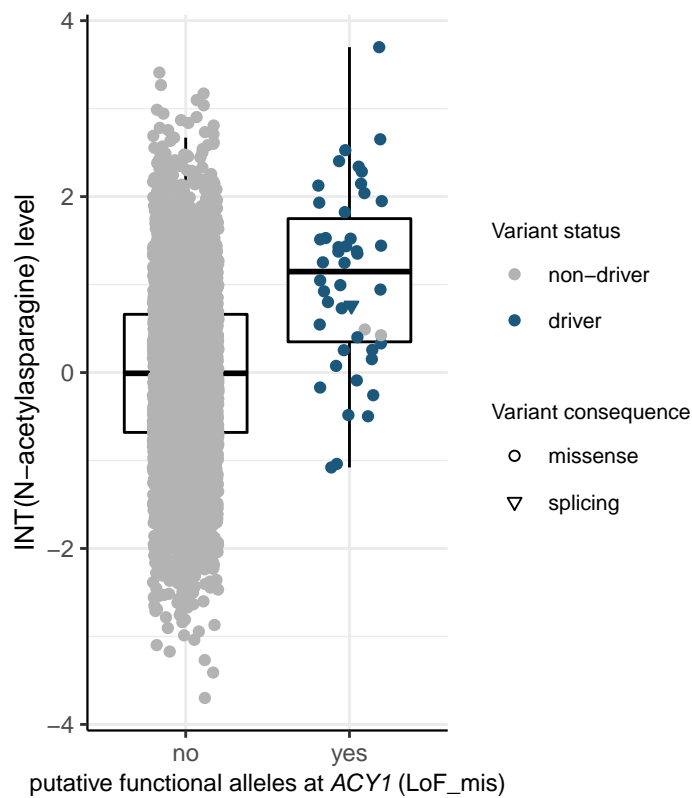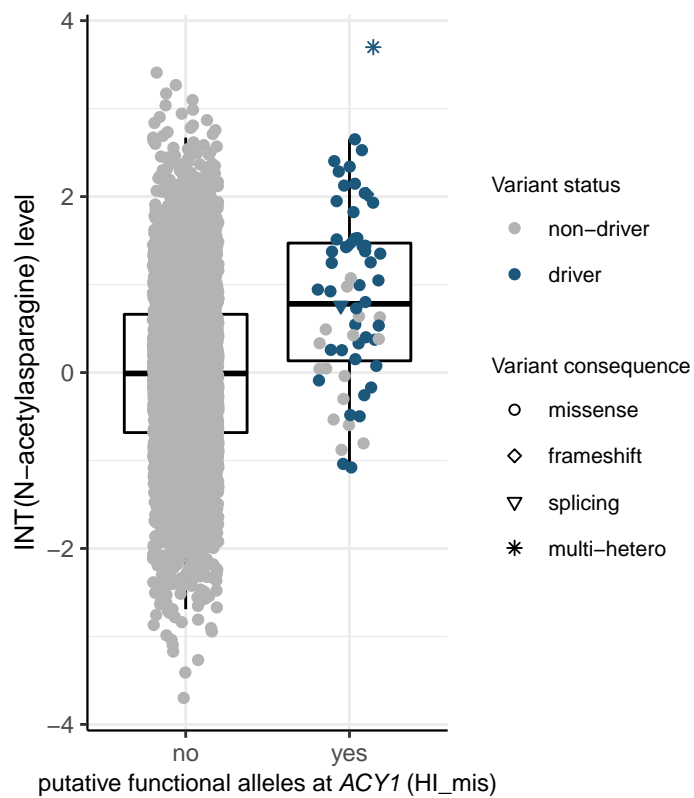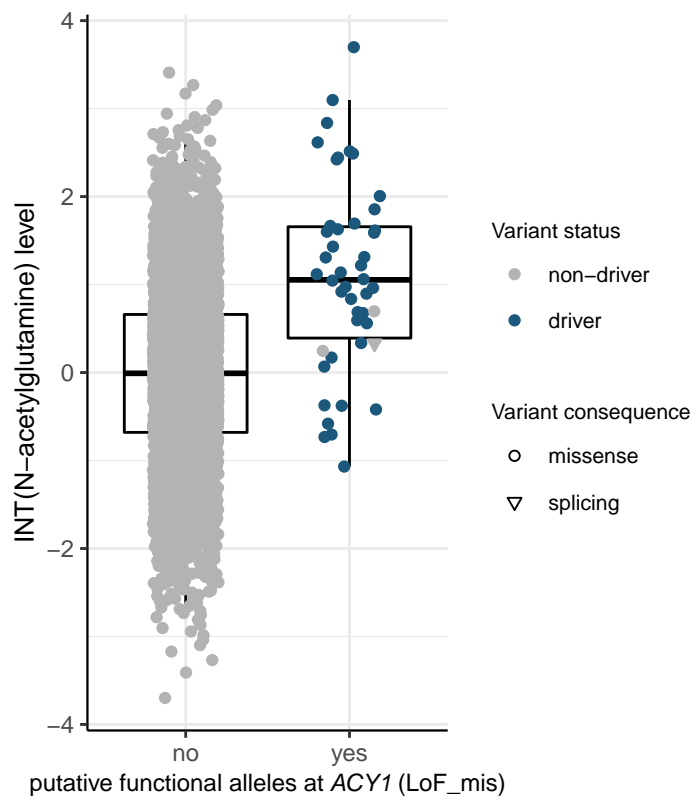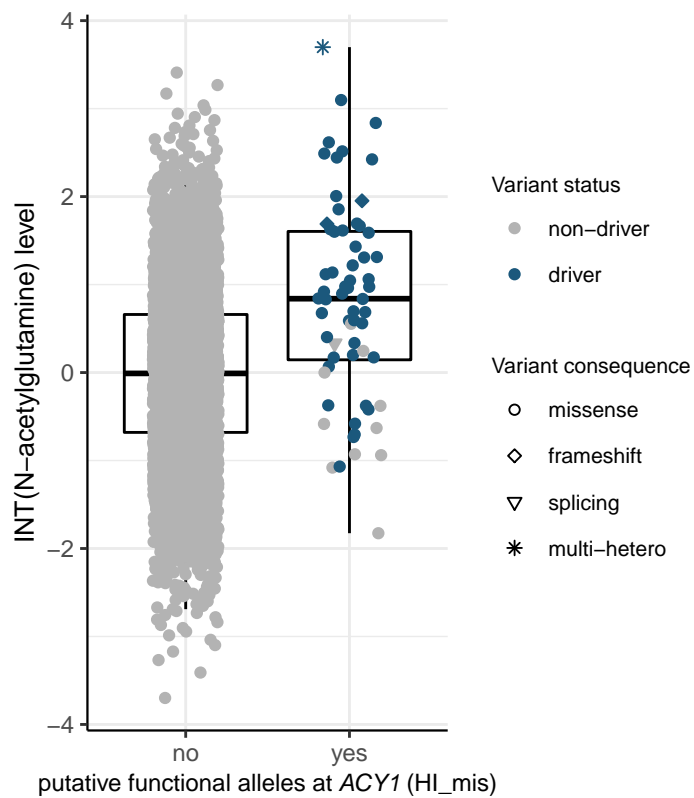

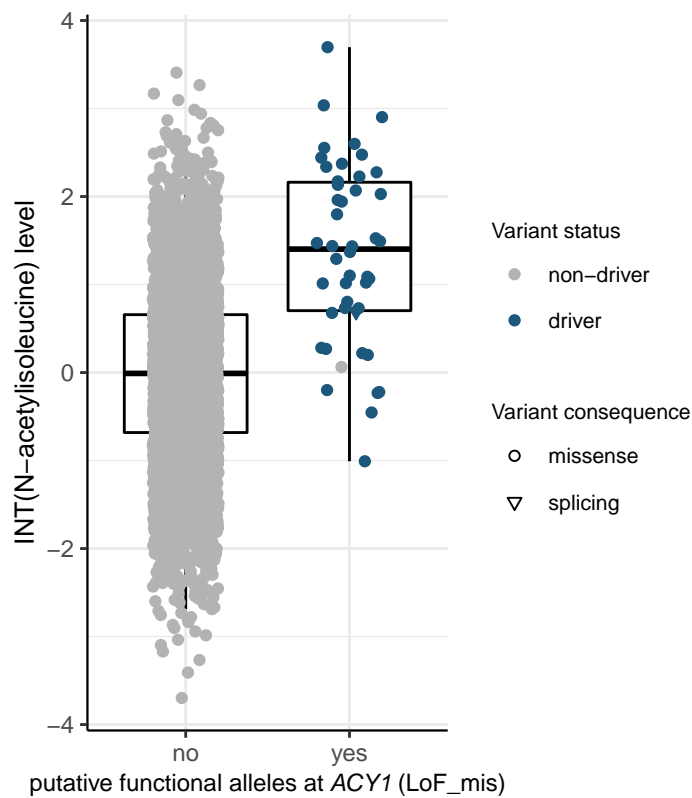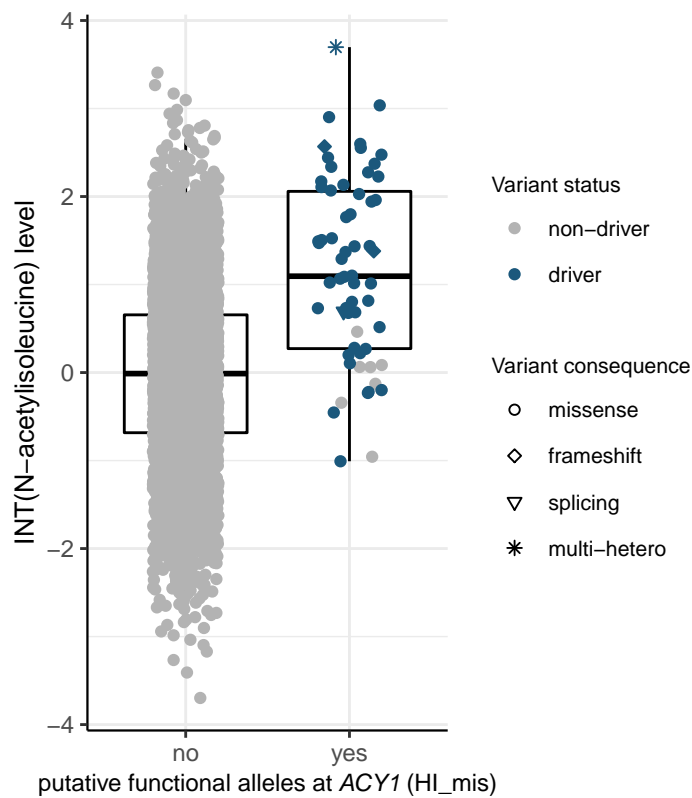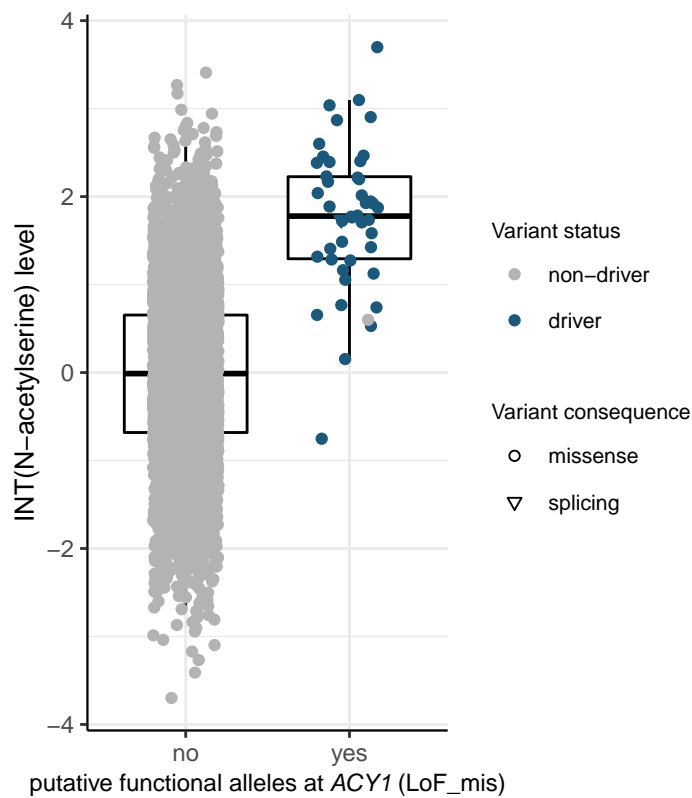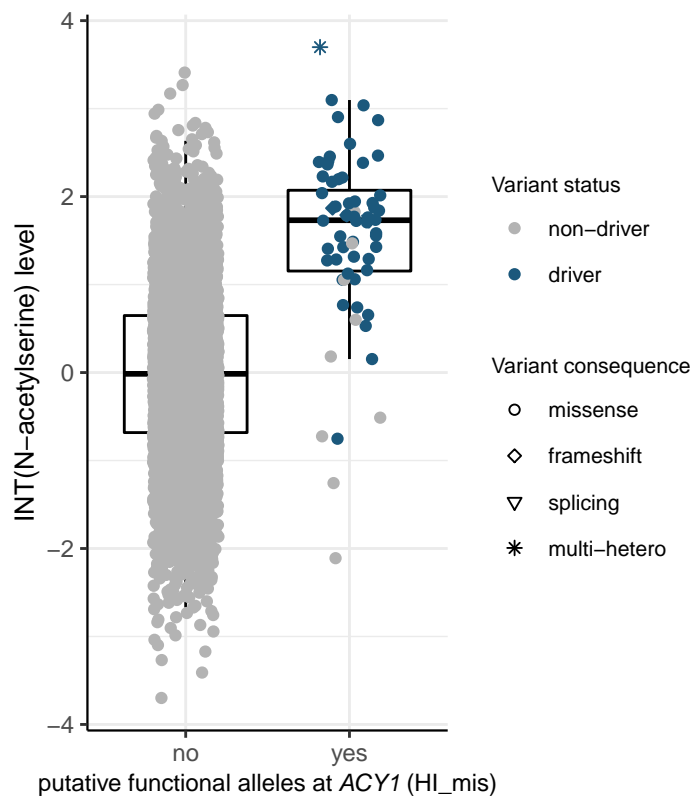

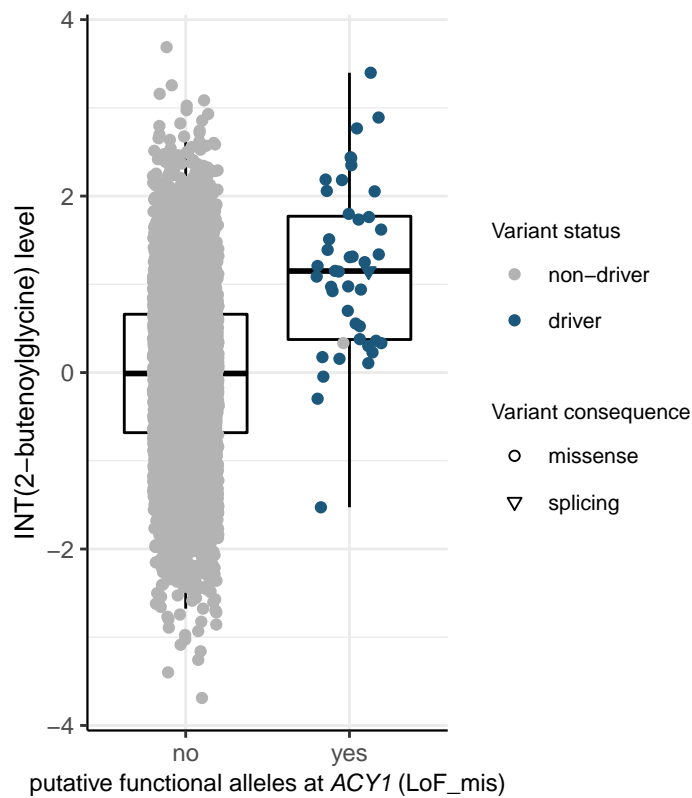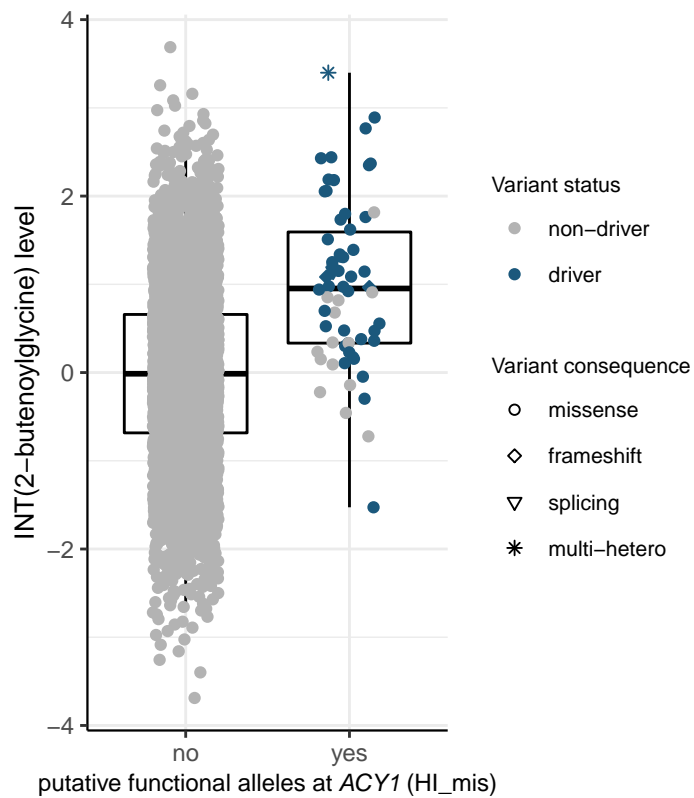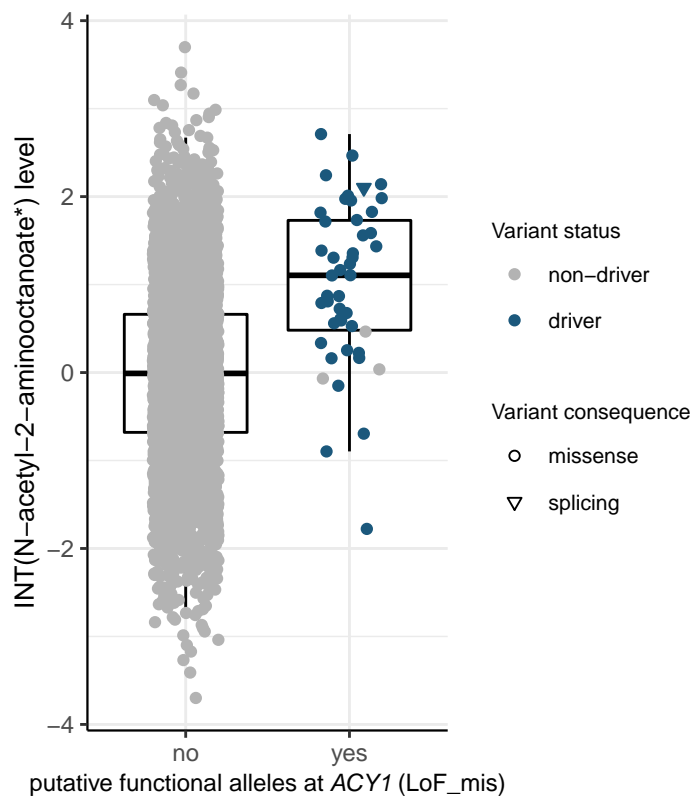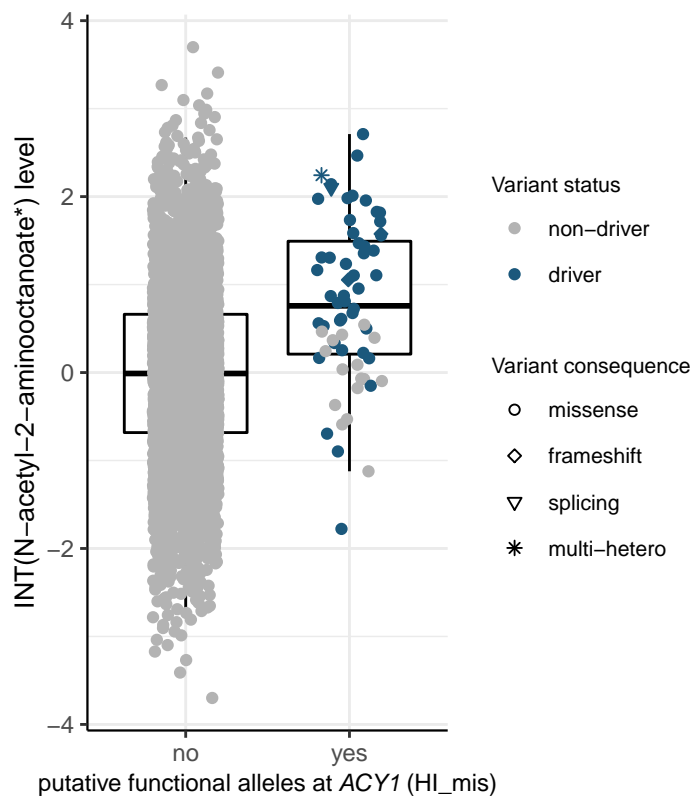



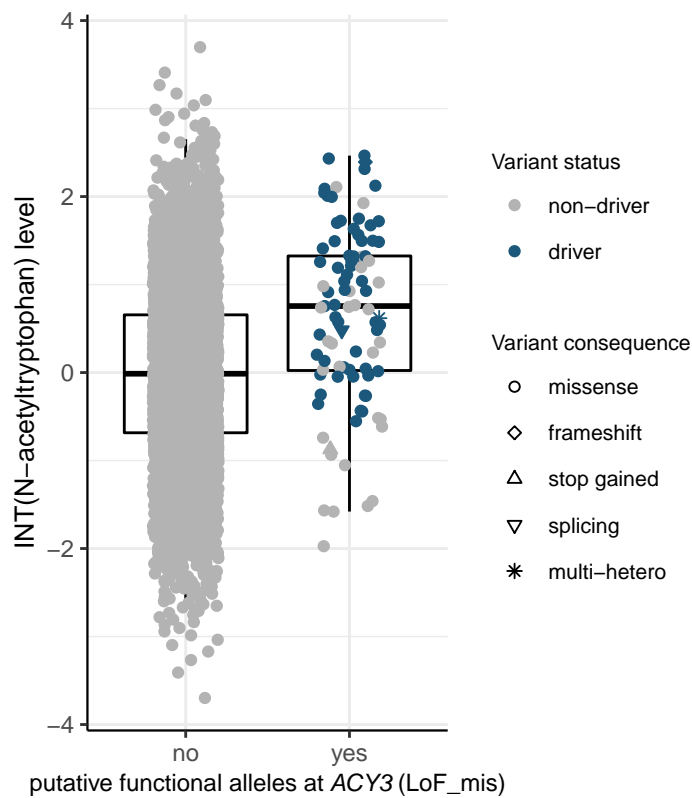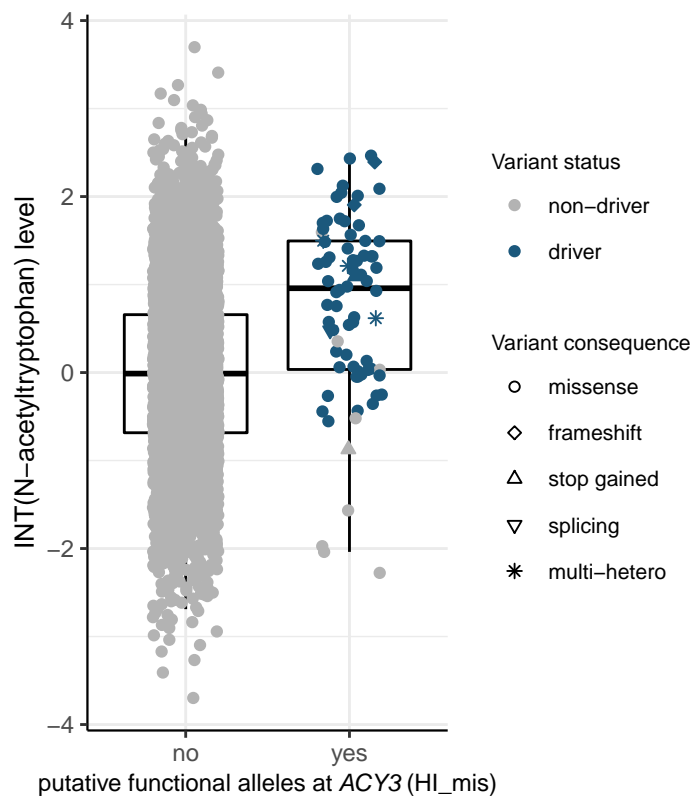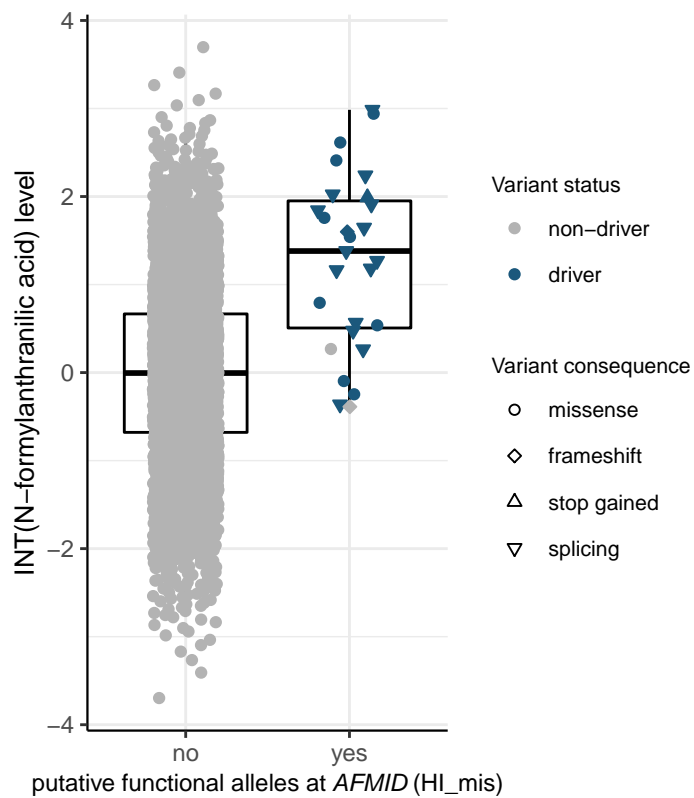

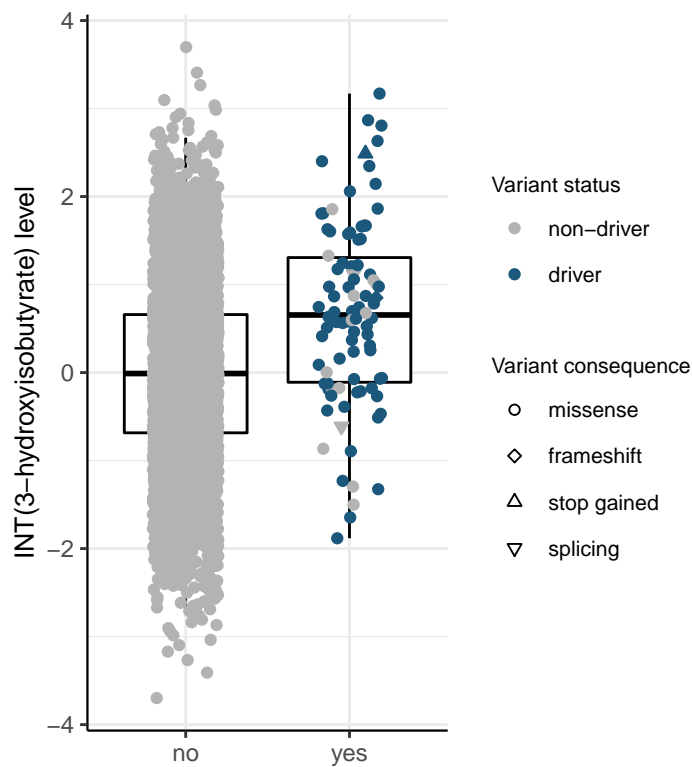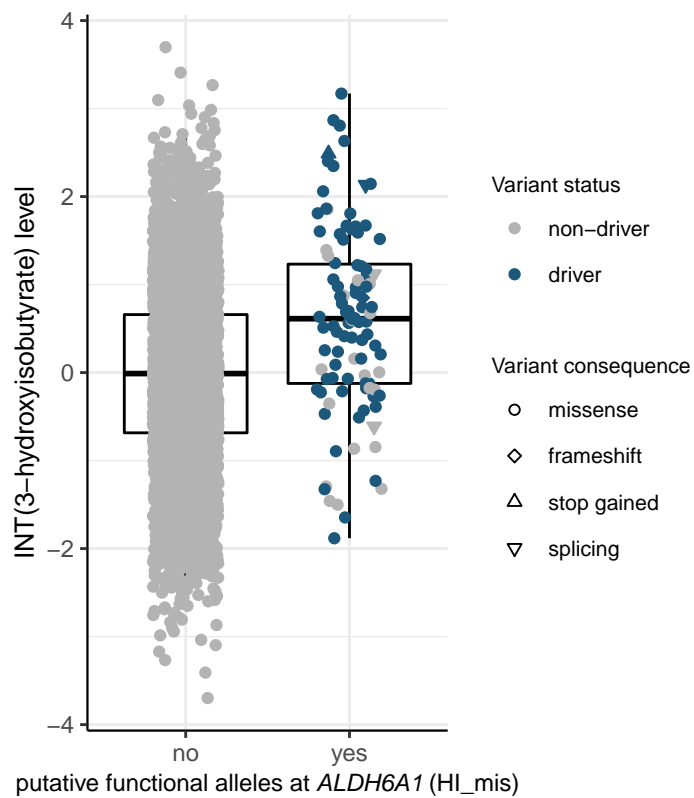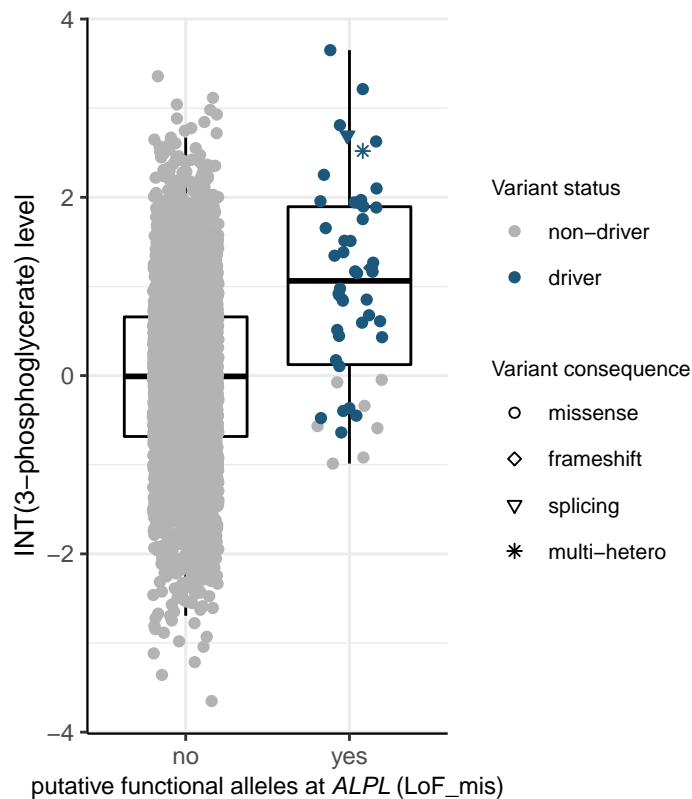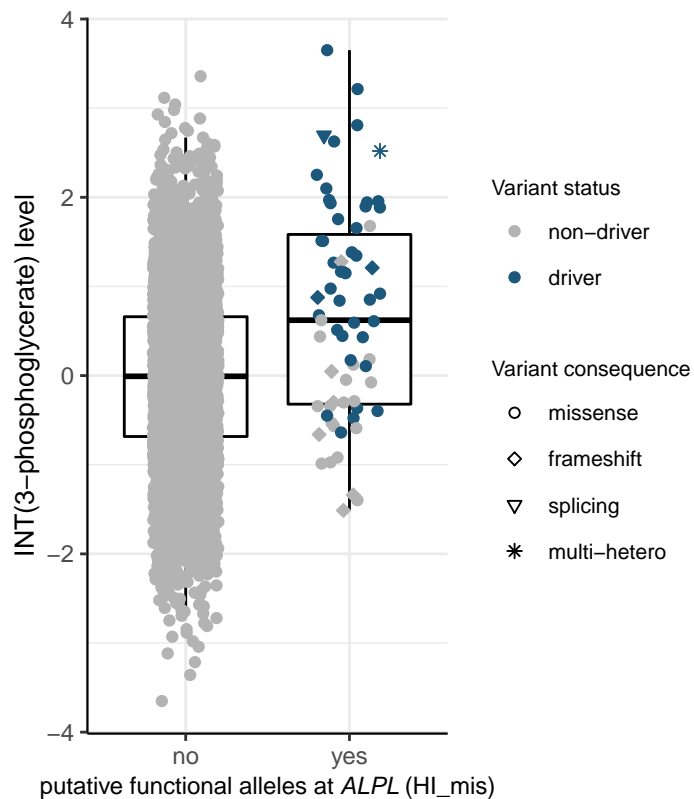

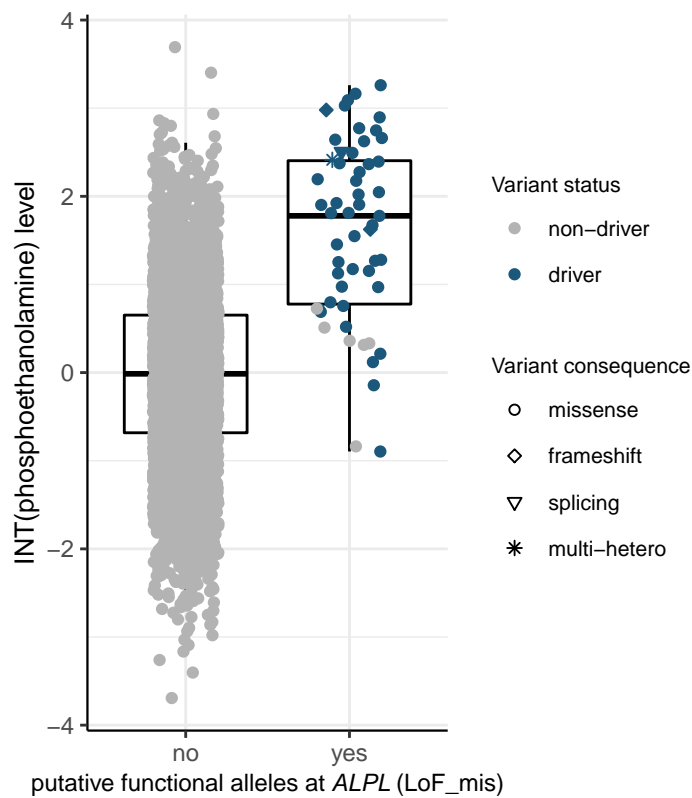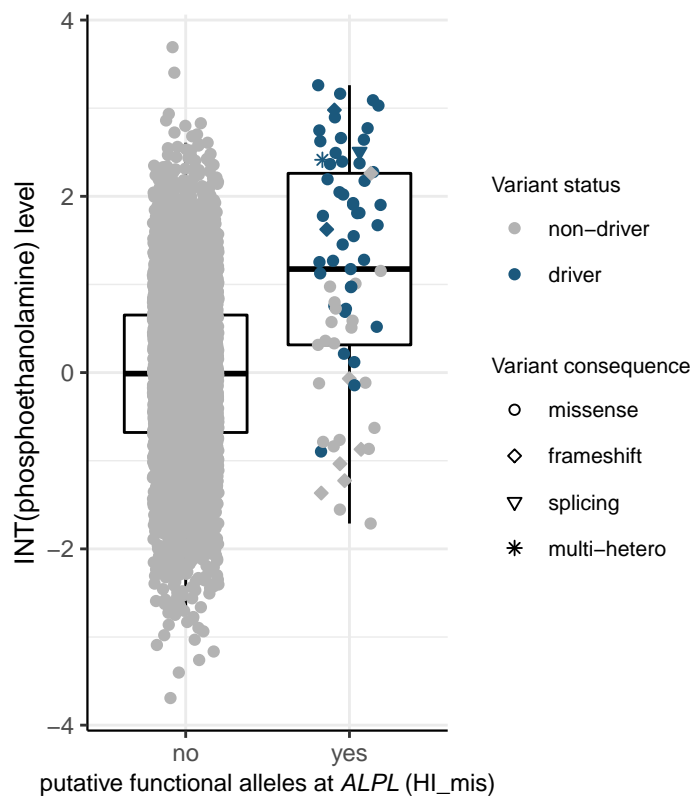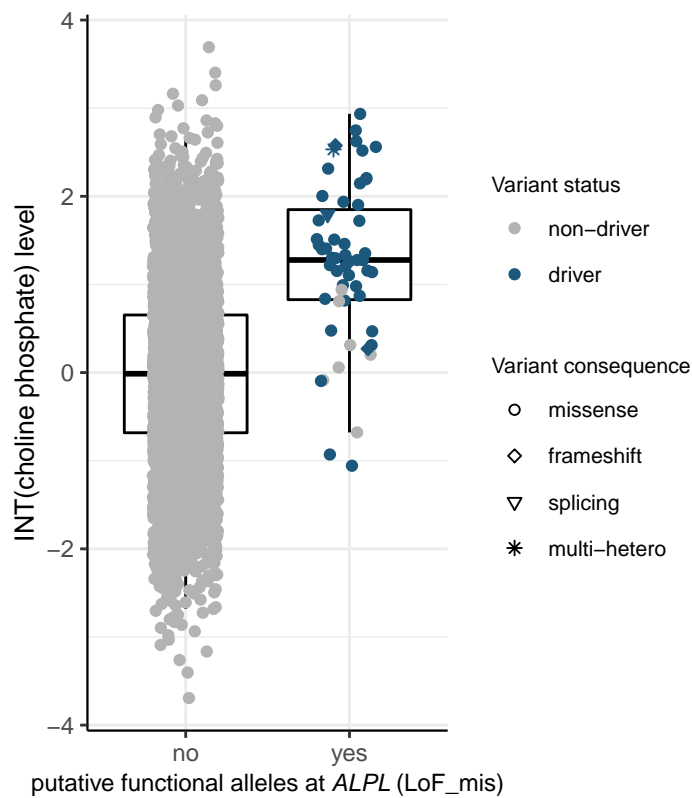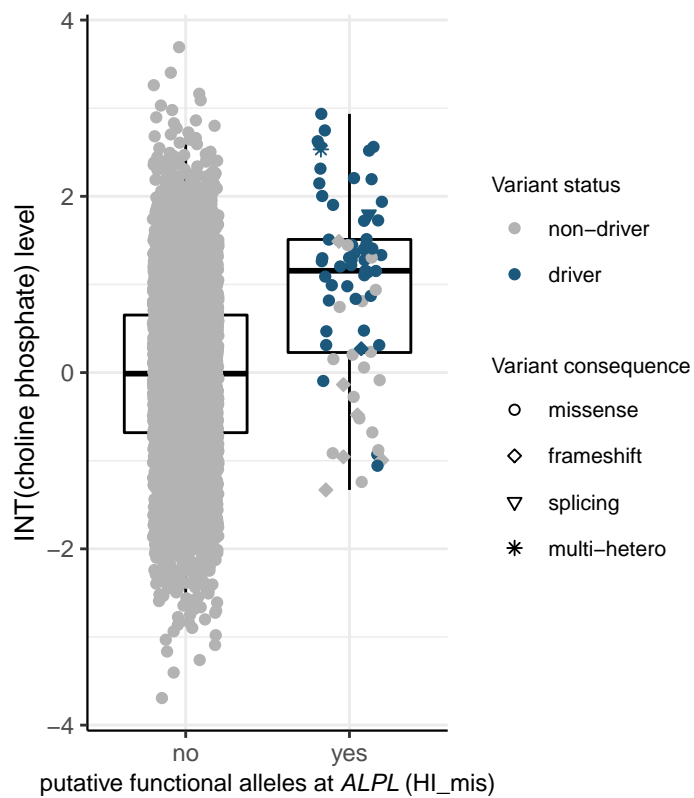

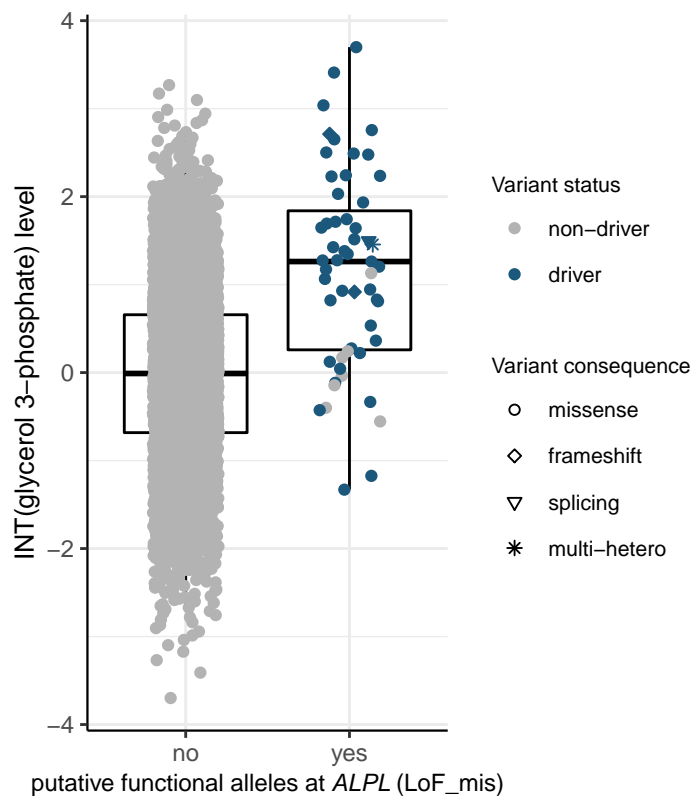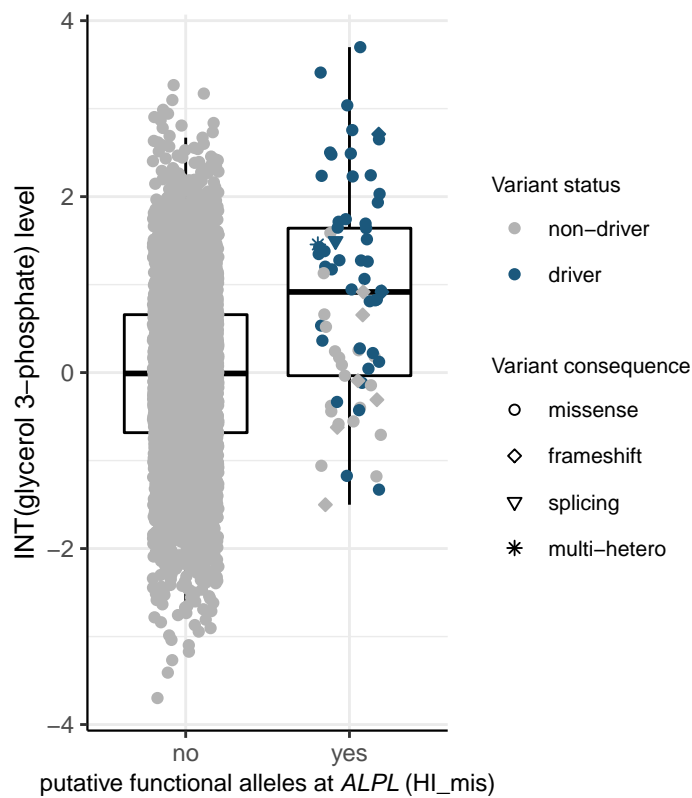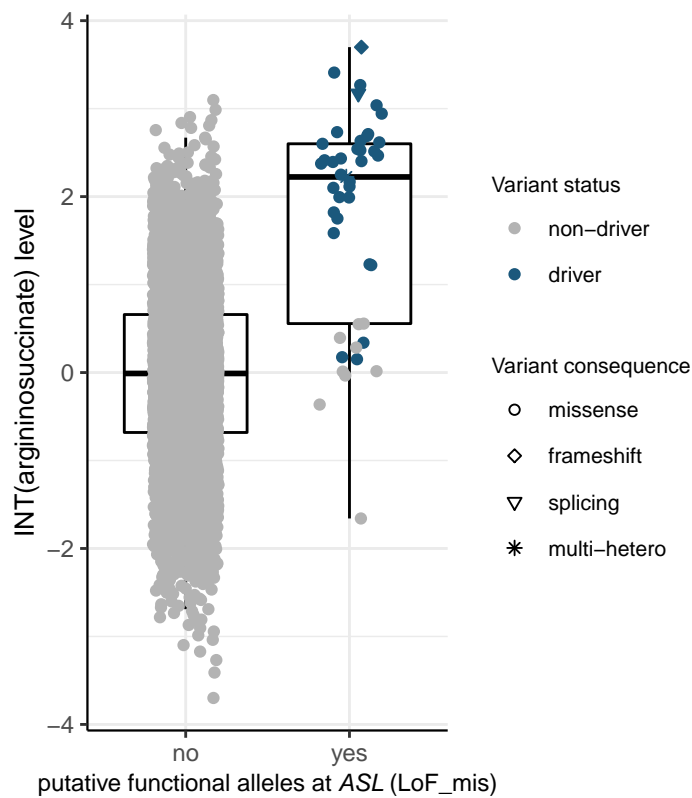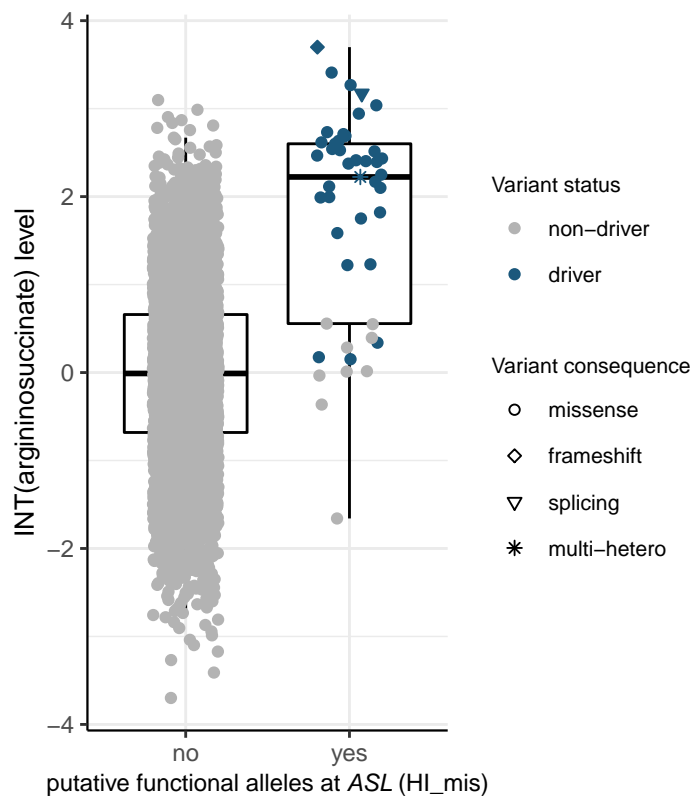

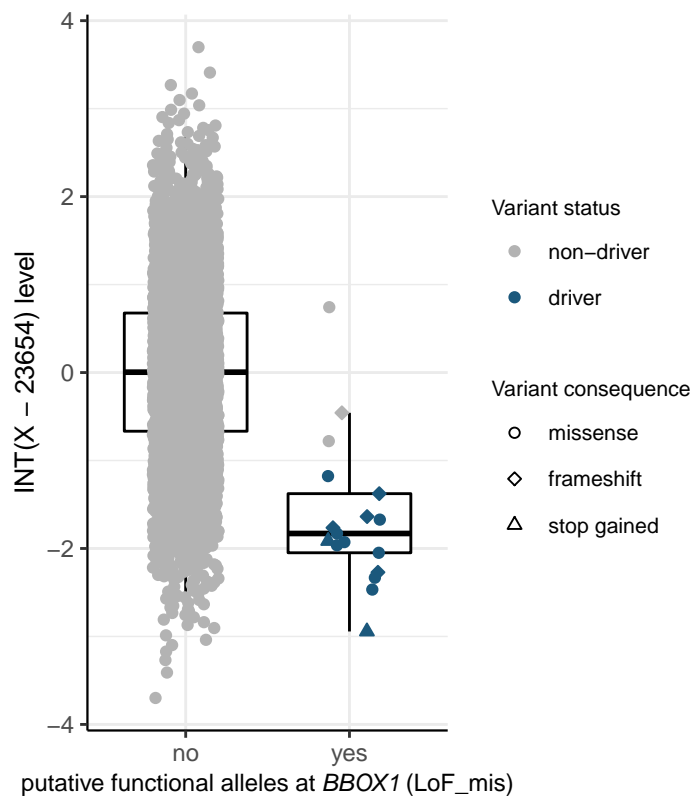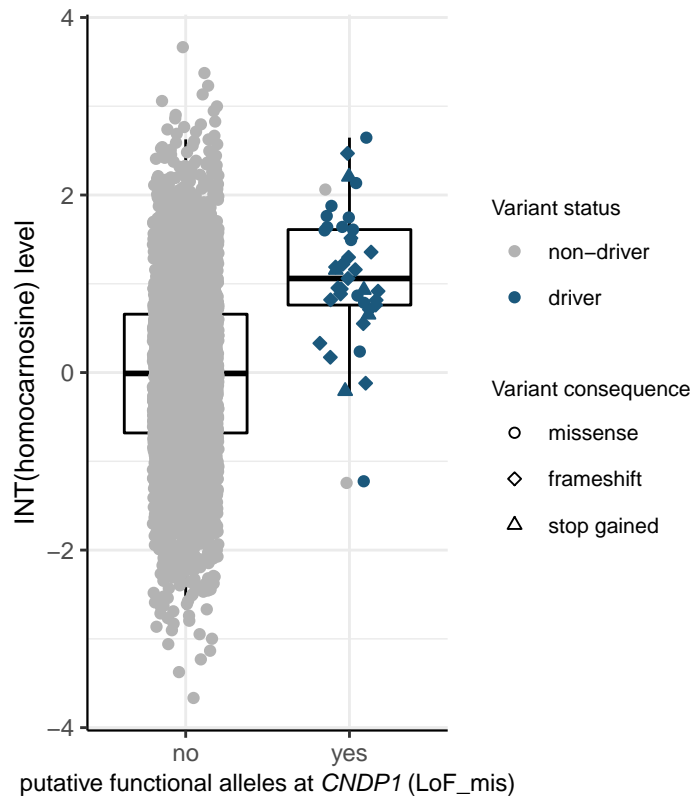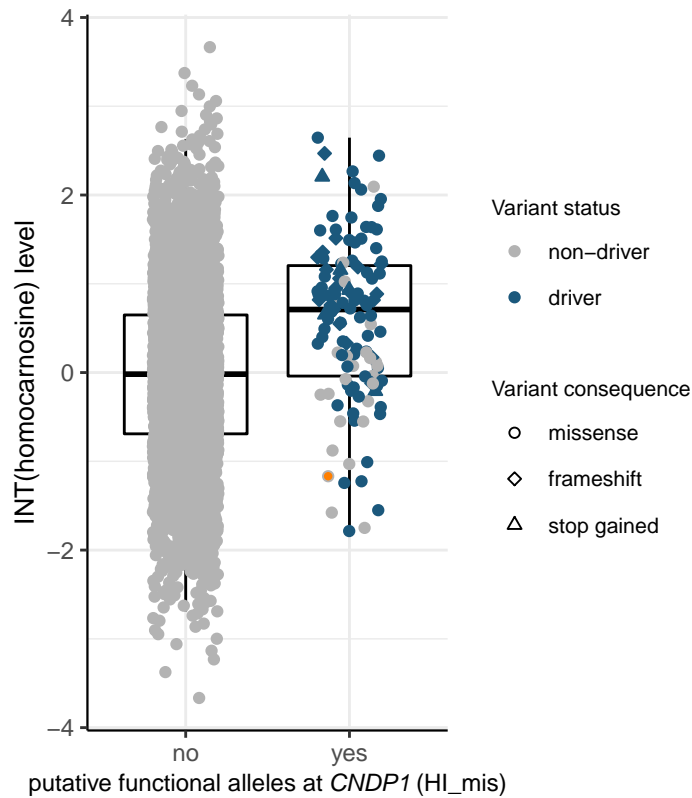

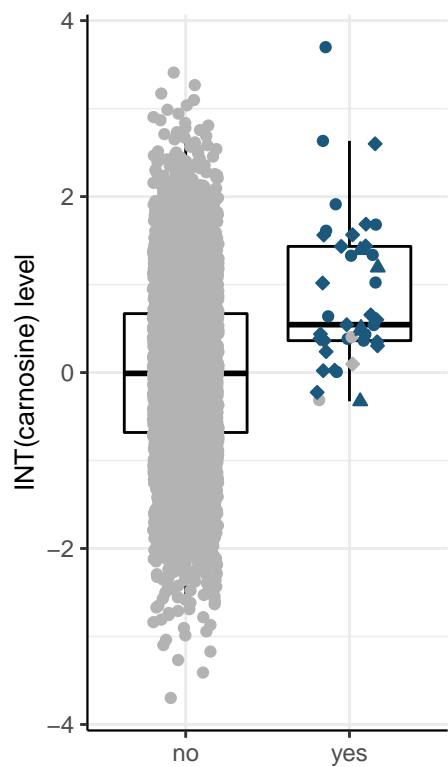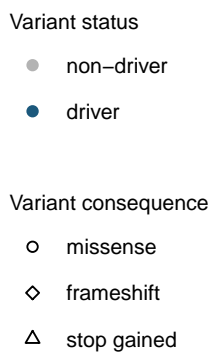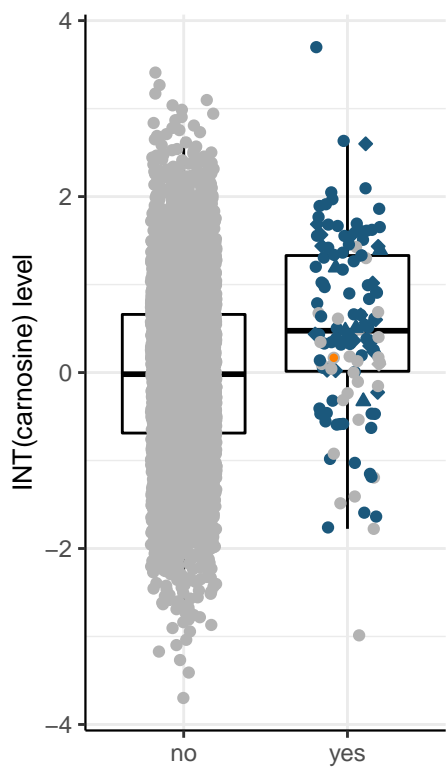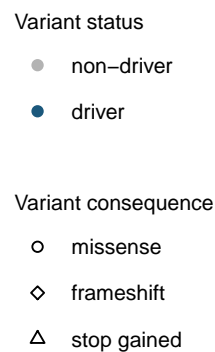

putative functional alleles at *CNDP1* (LoF\_mis)

putative functional alleles at *CNDP1* (HI\_mis)

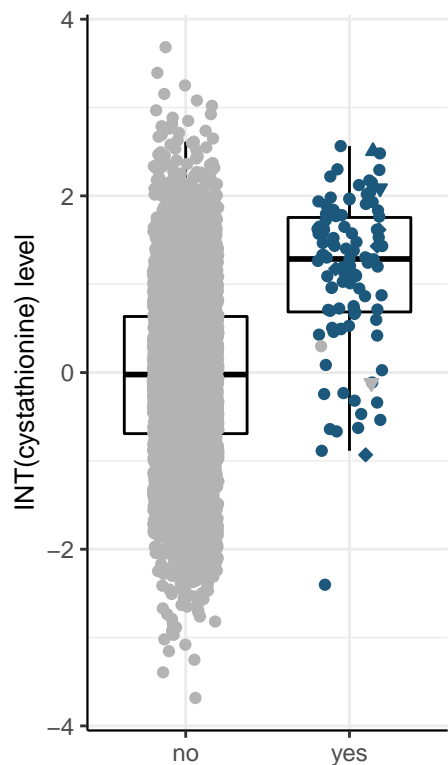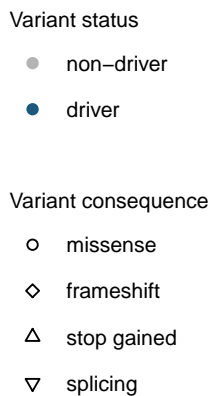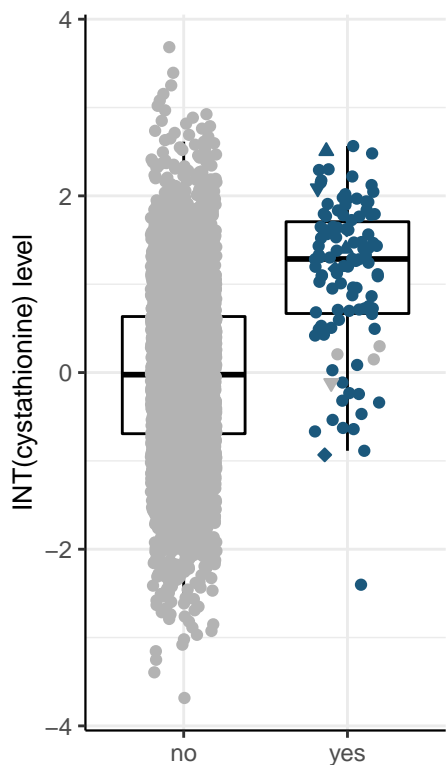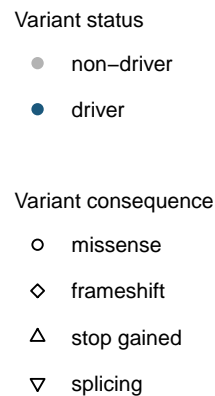

putative functional alleles at *CTH* (LoF\_mis)

putative functional alleles at *CTH* (HI\_mis)

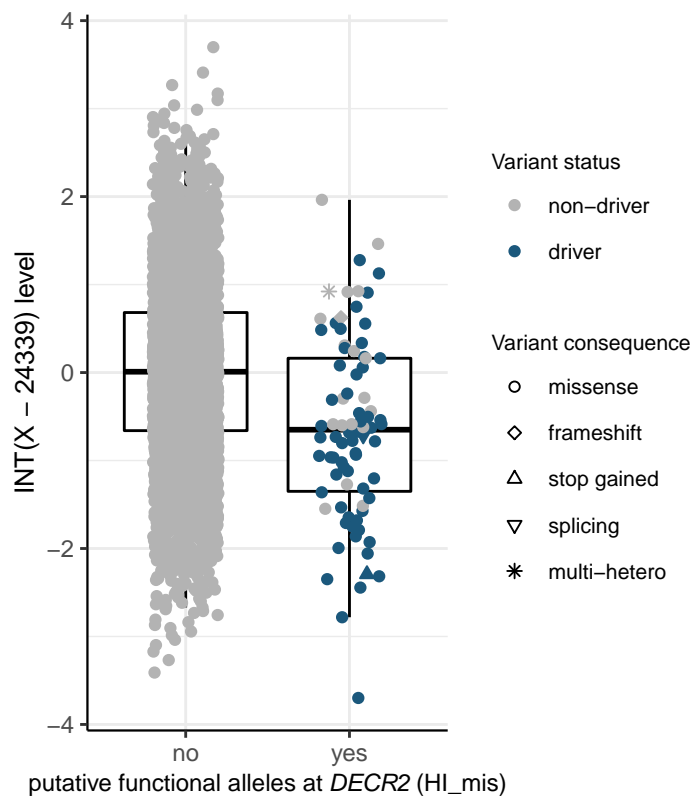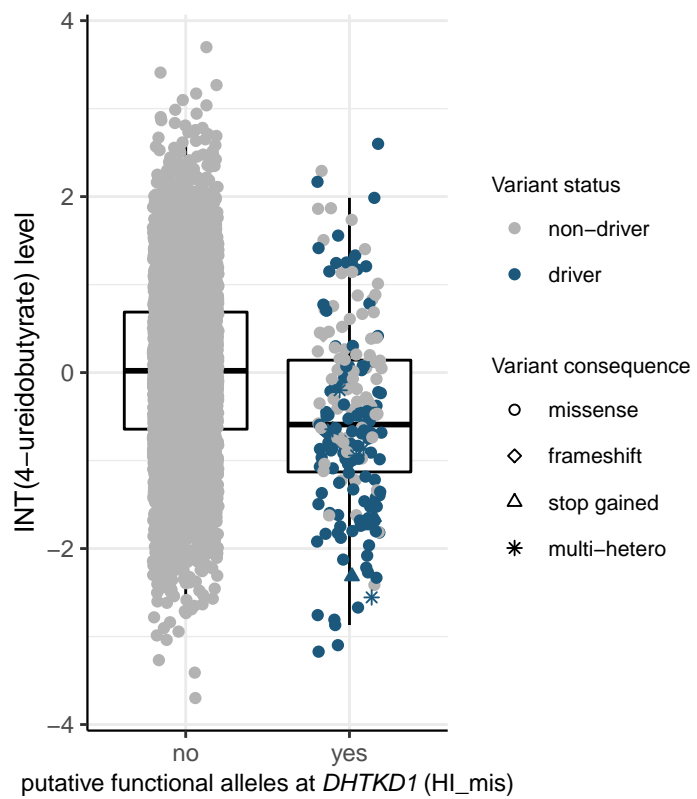

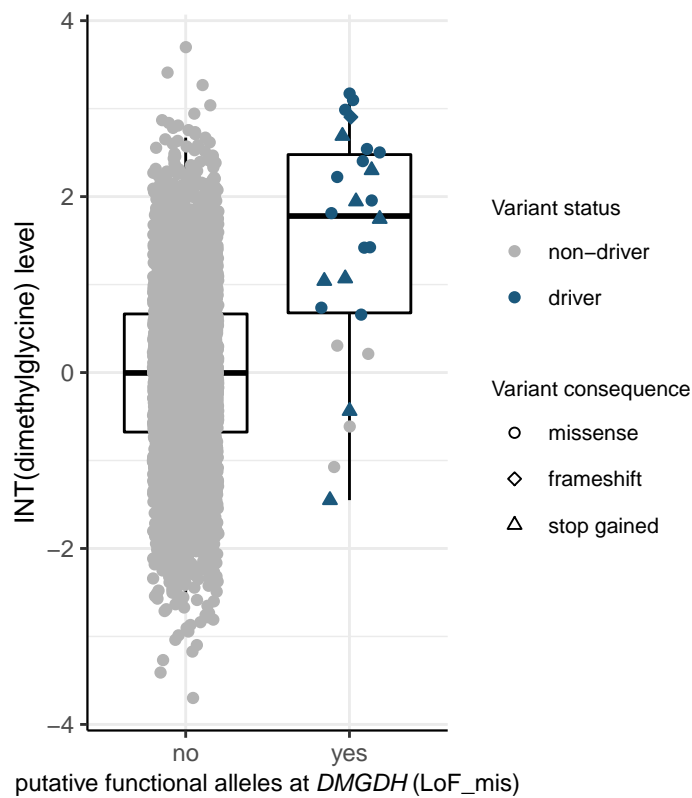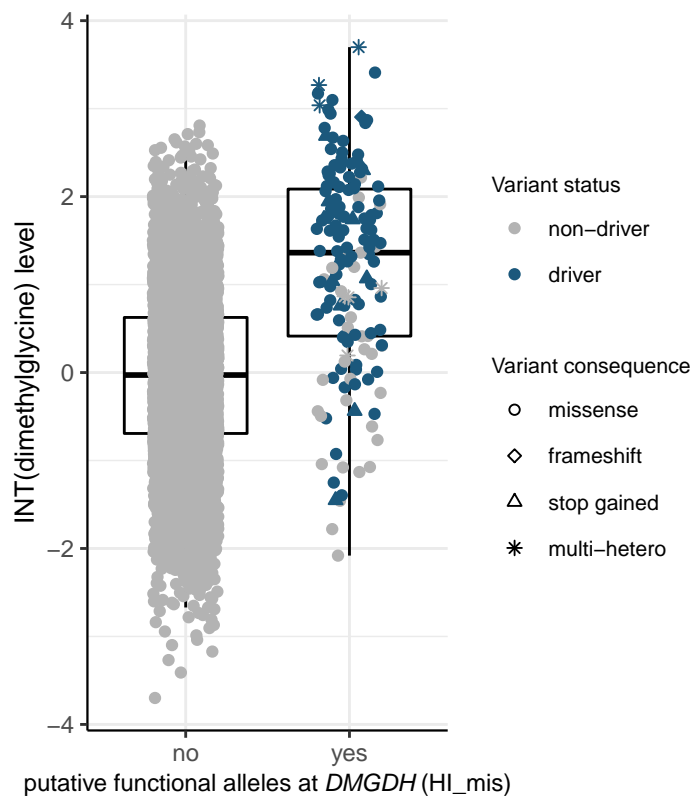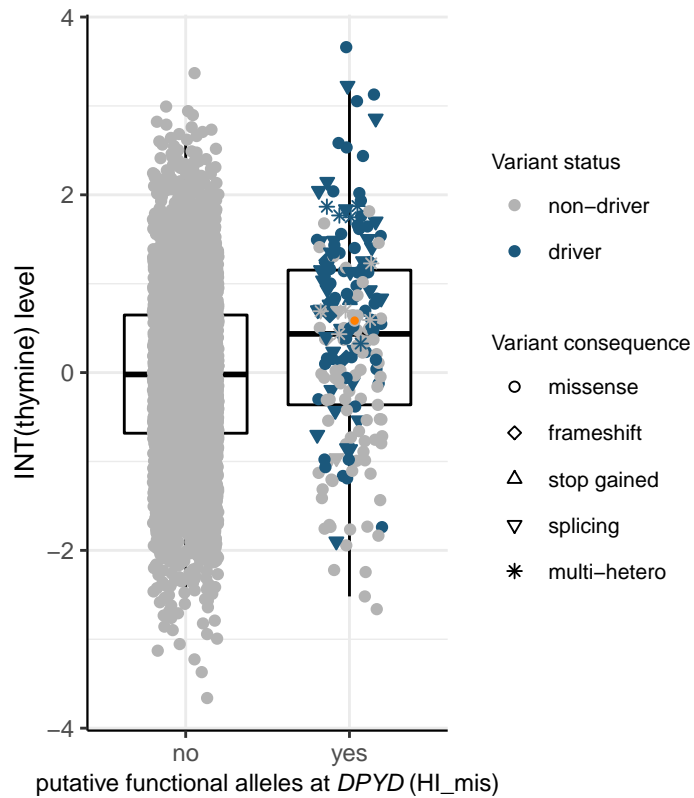



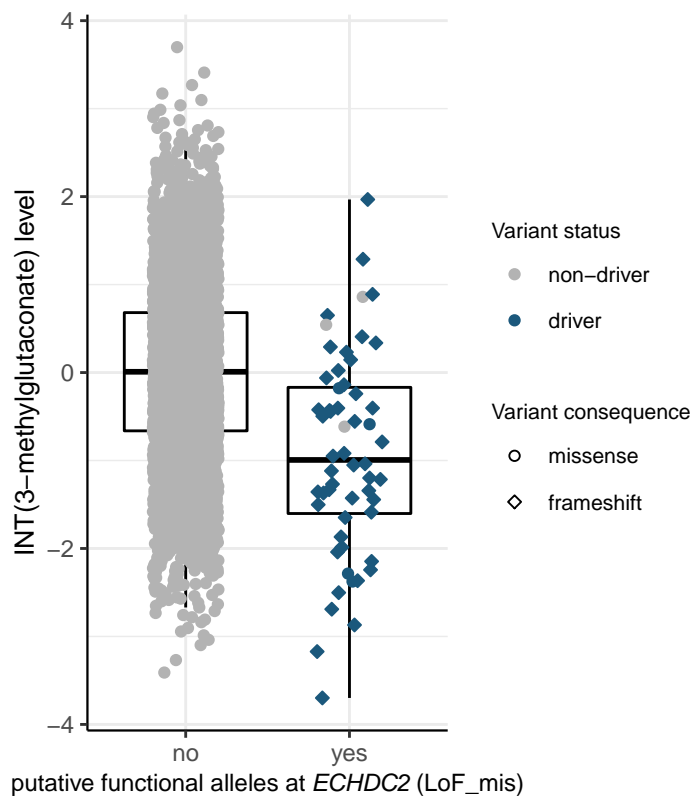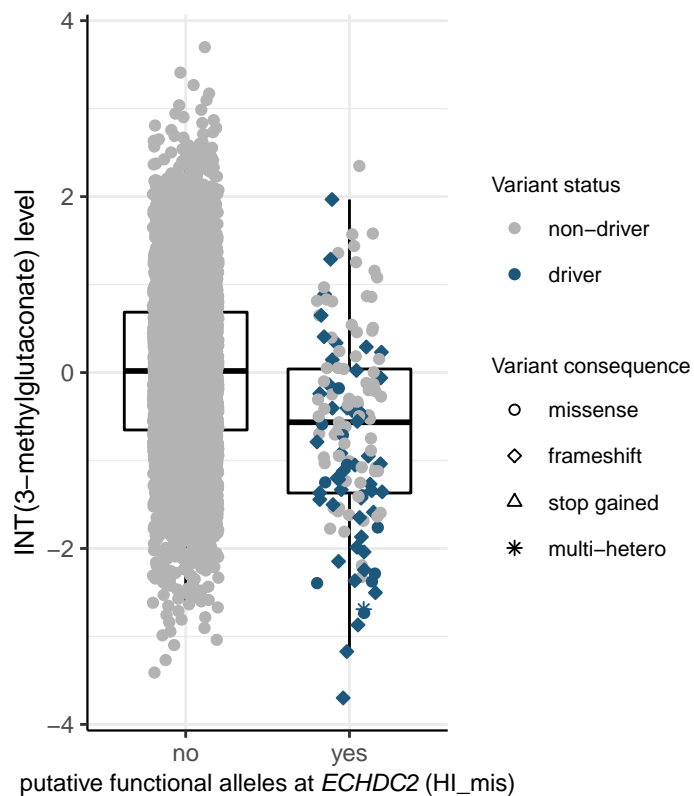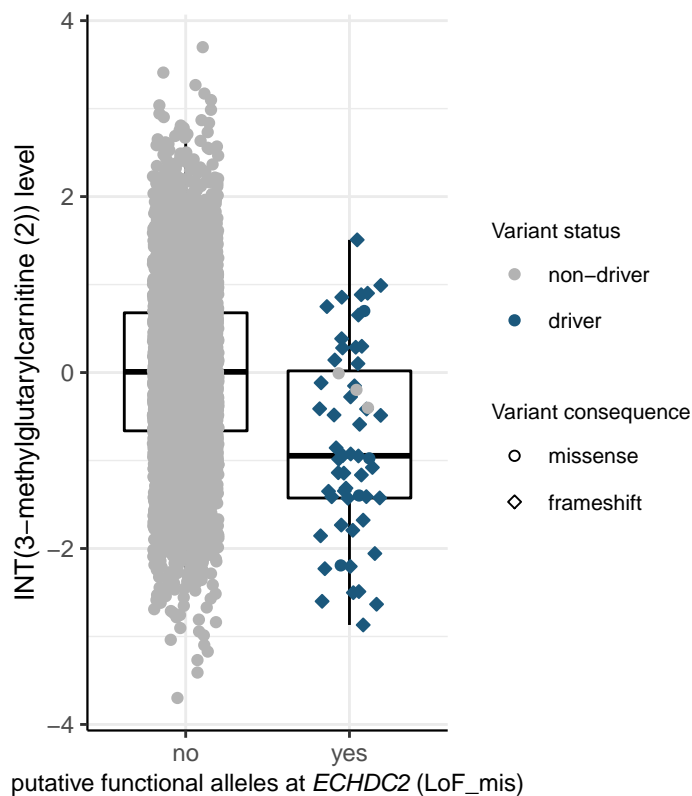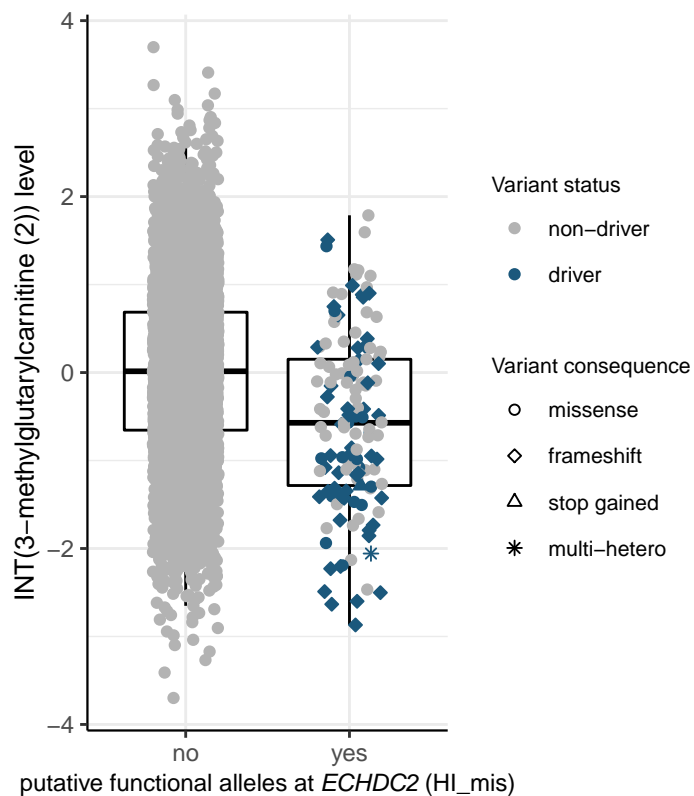

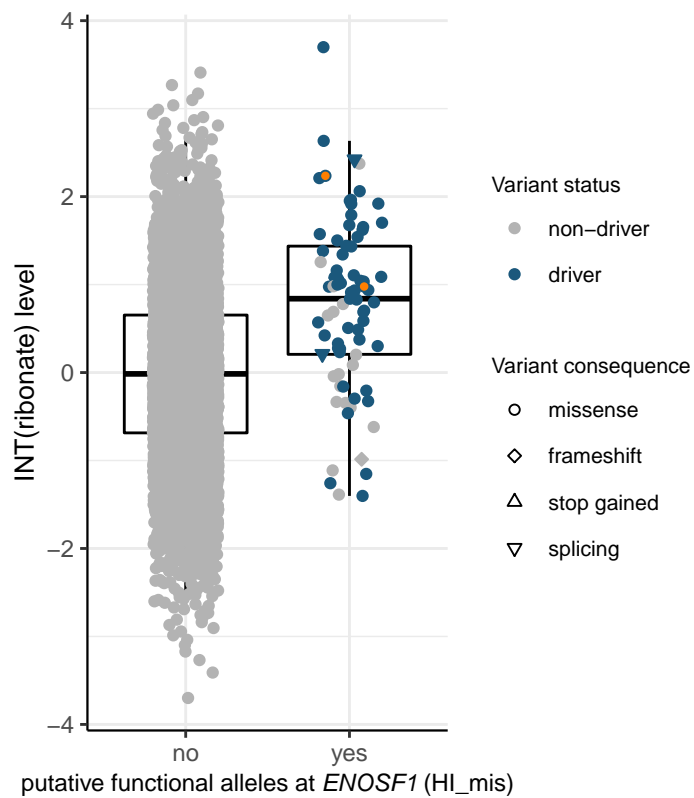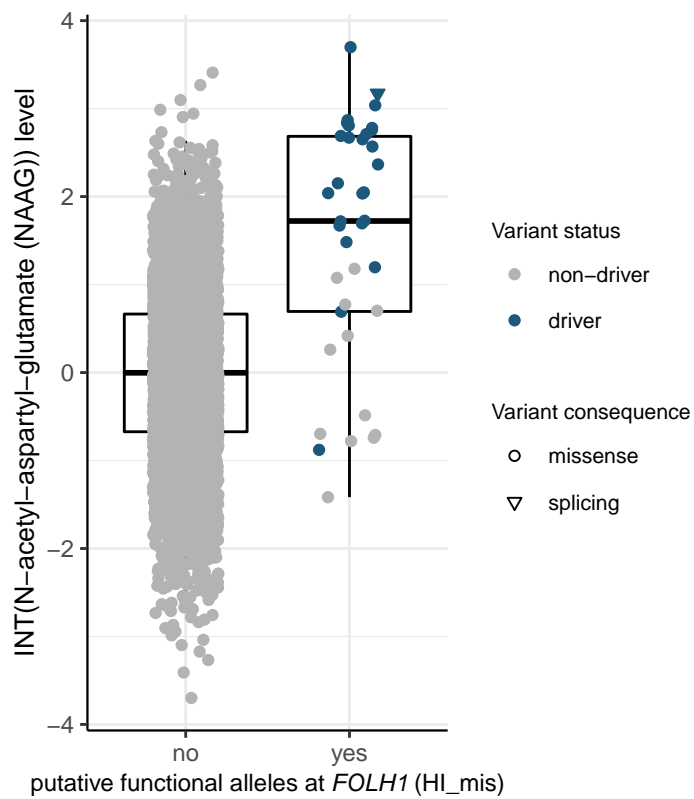

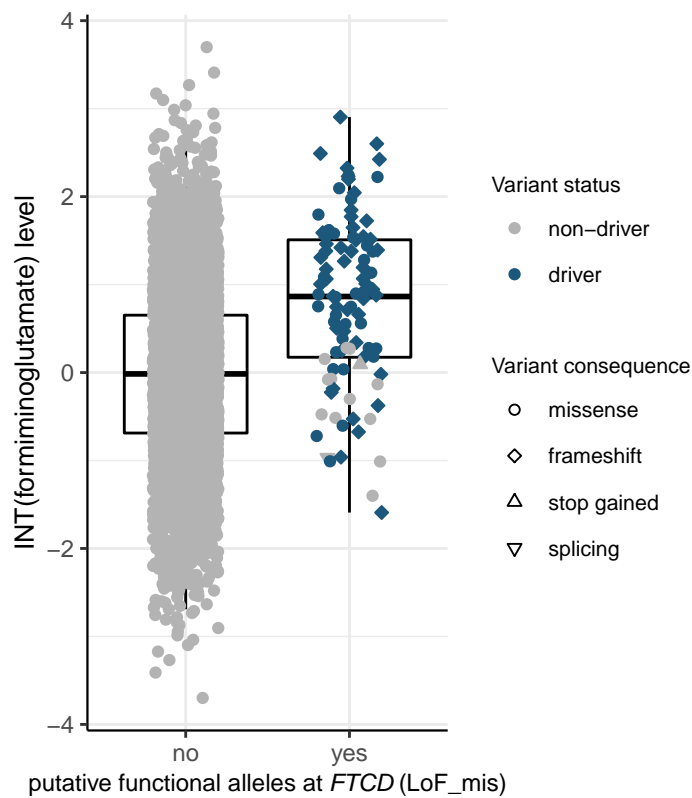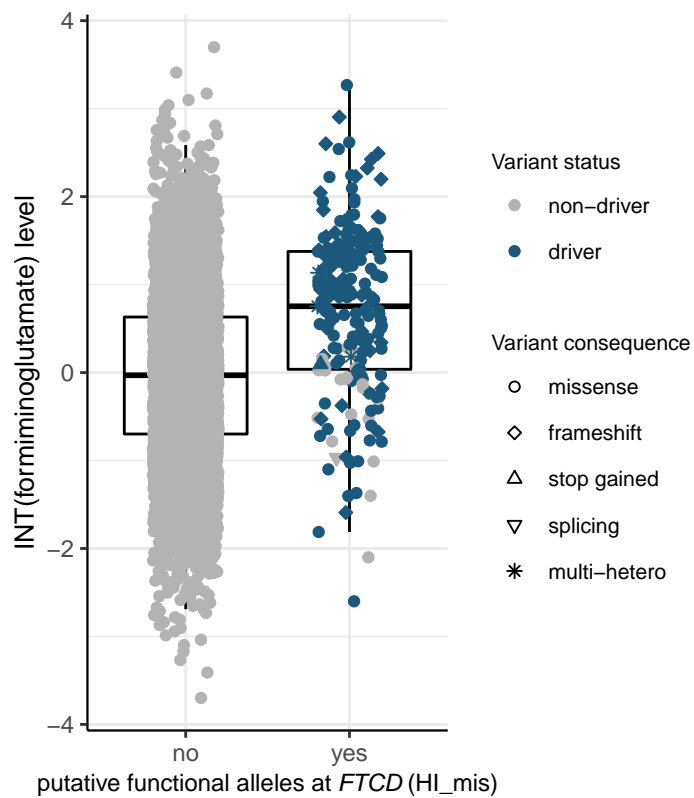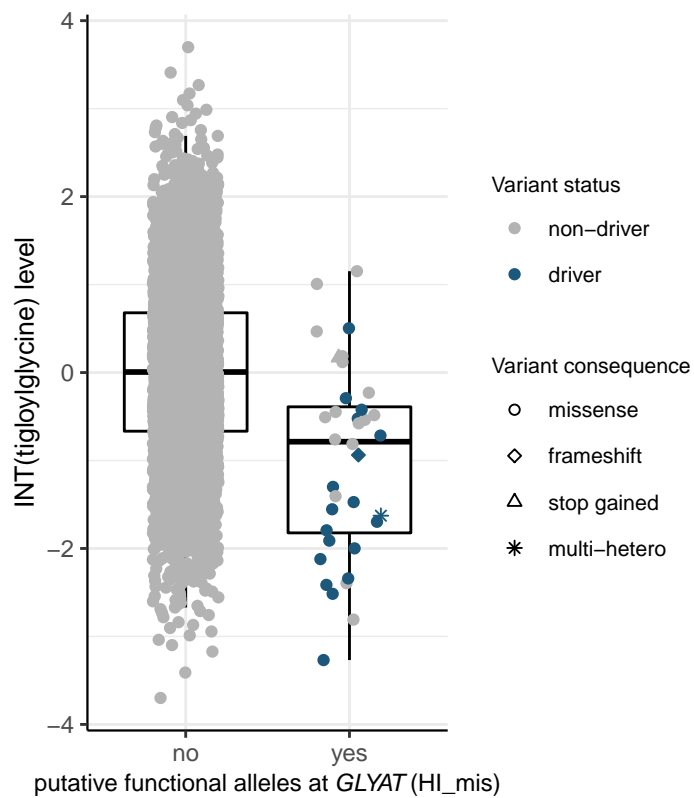

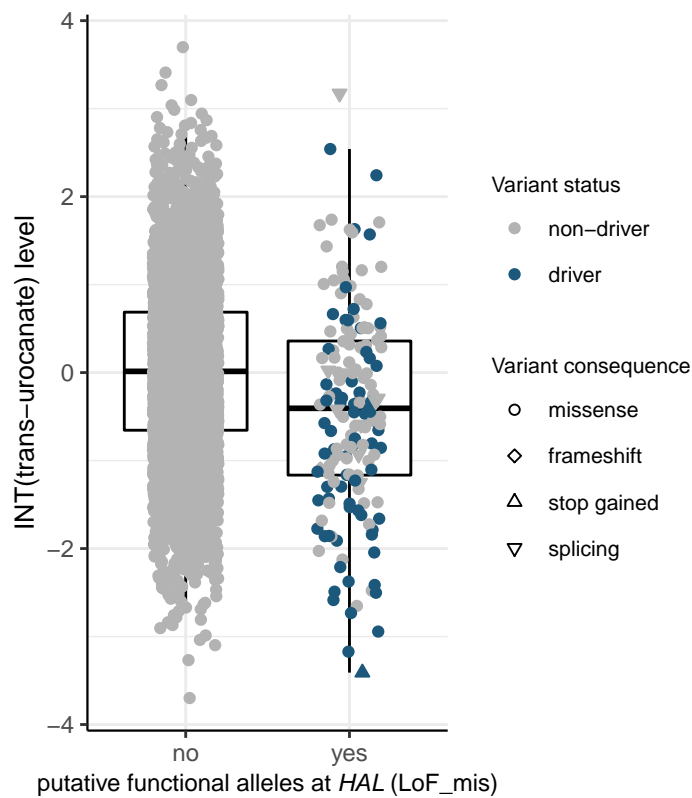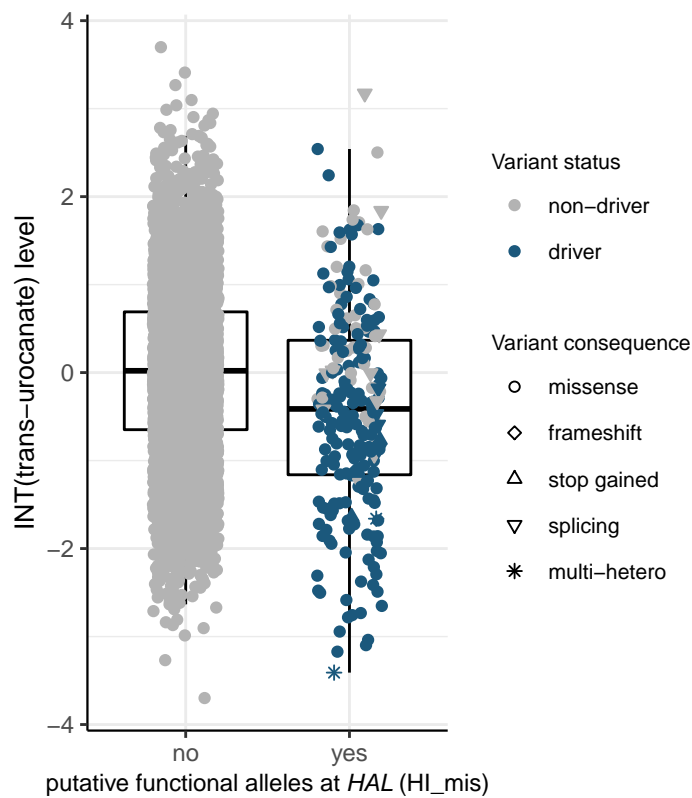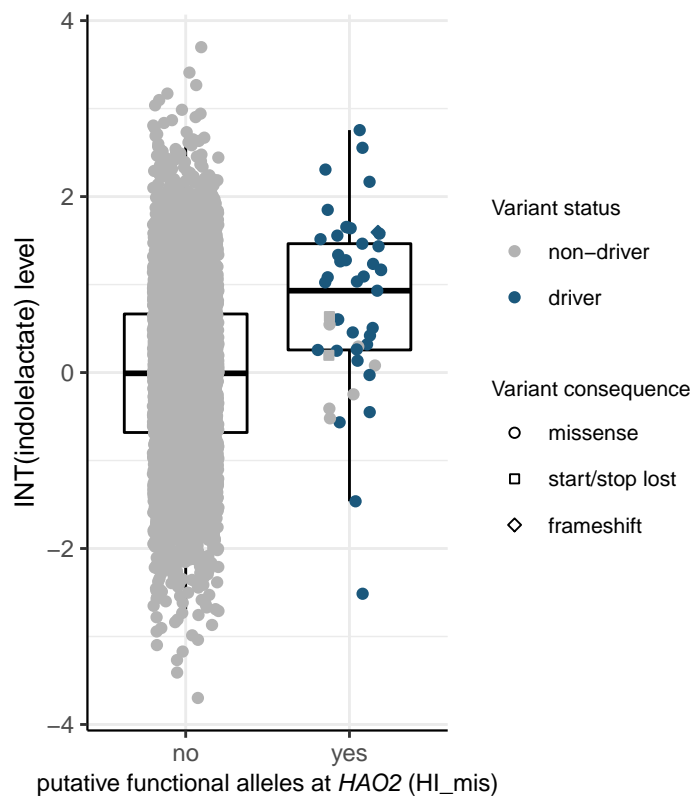

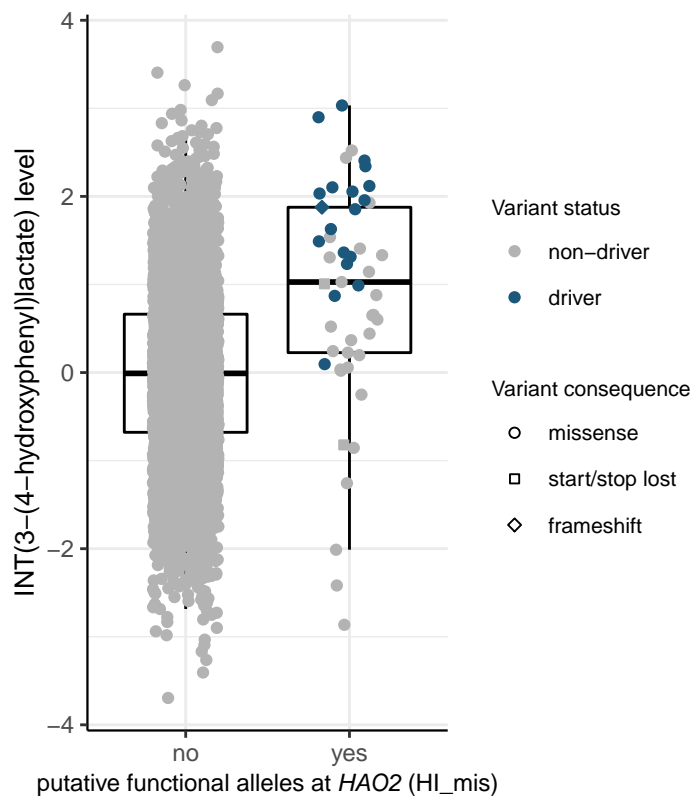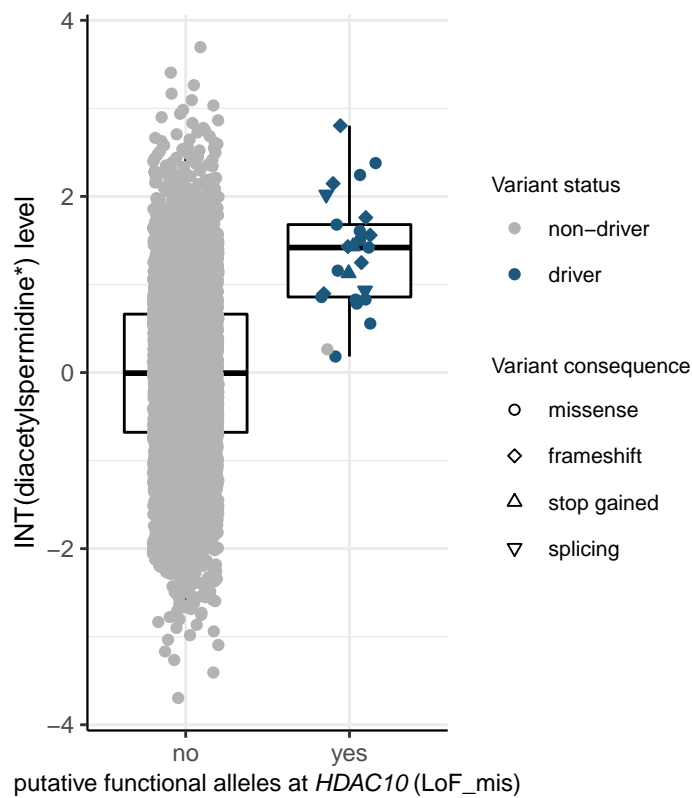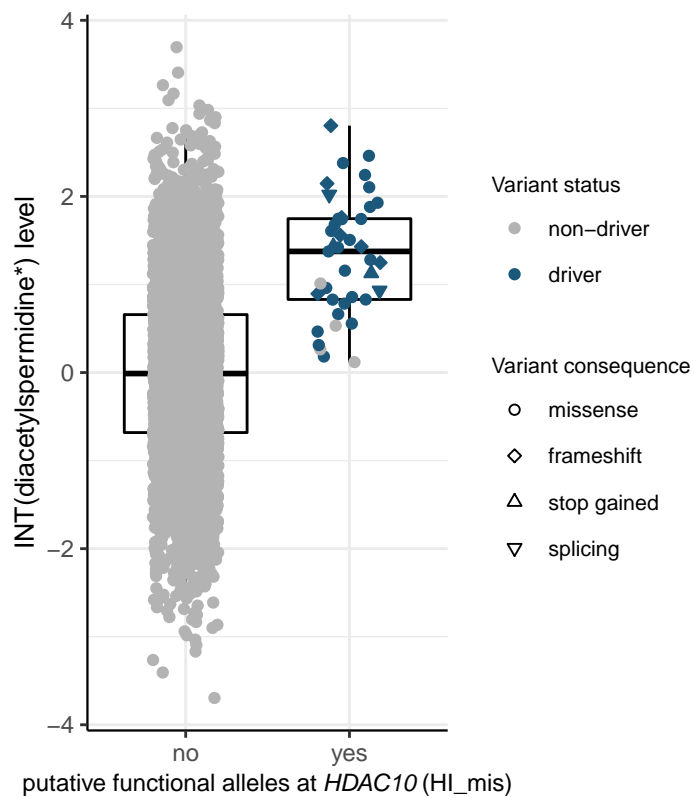

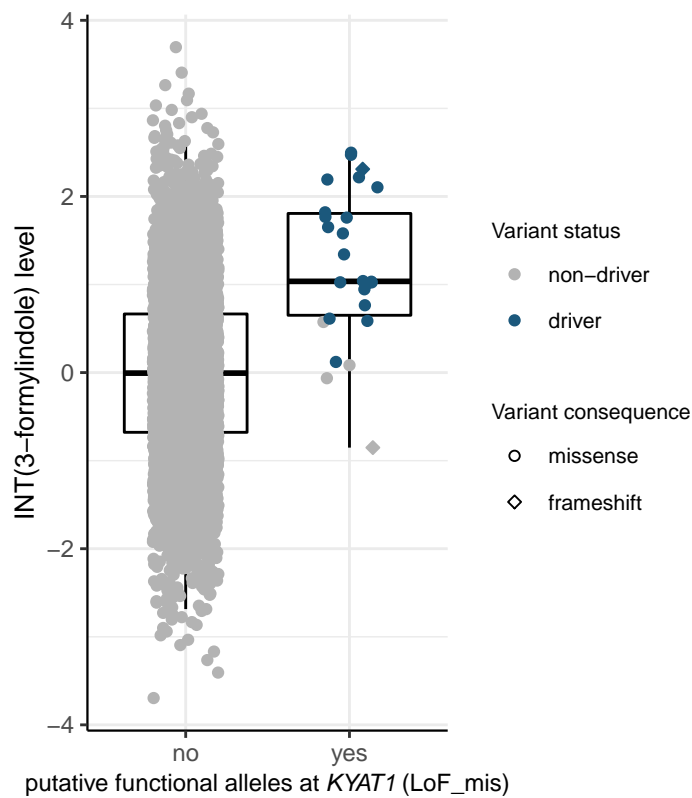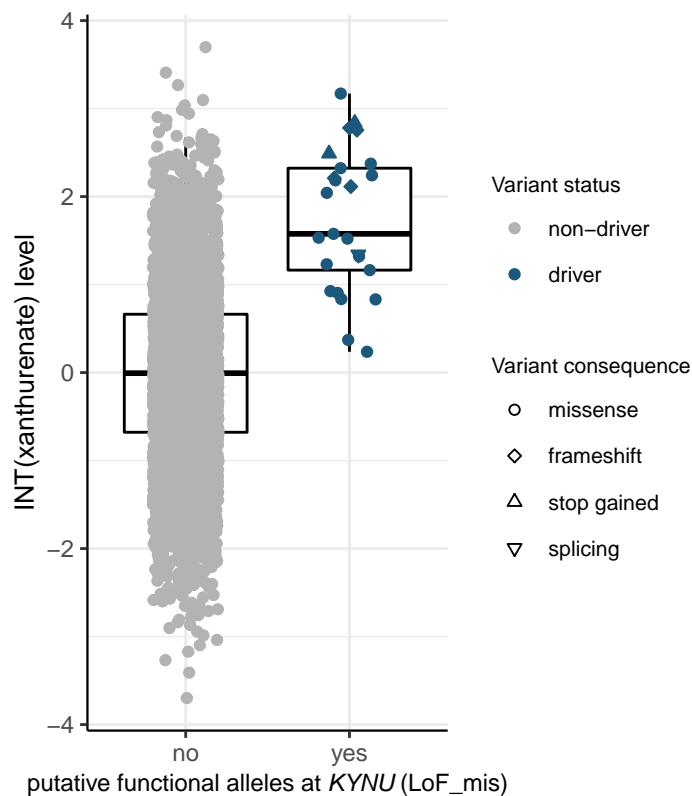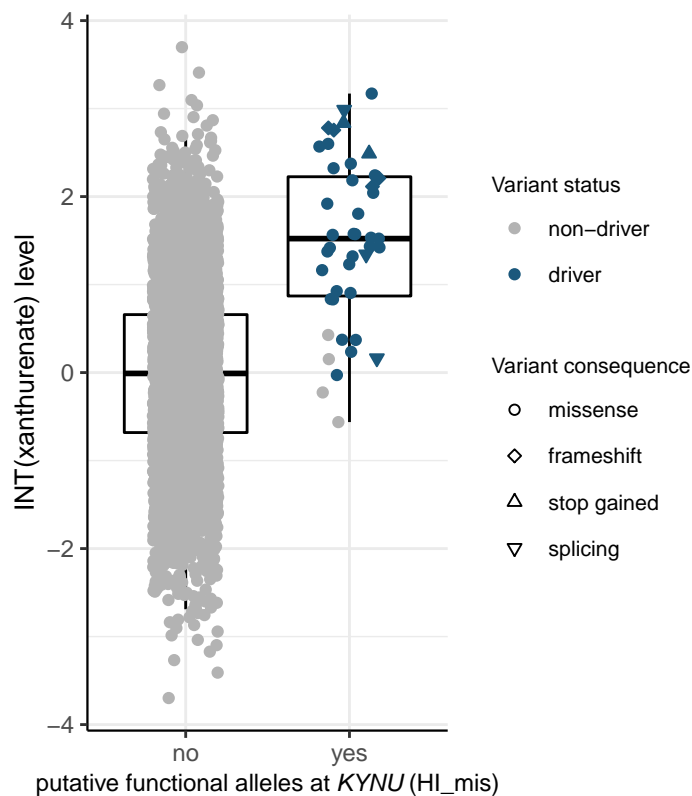

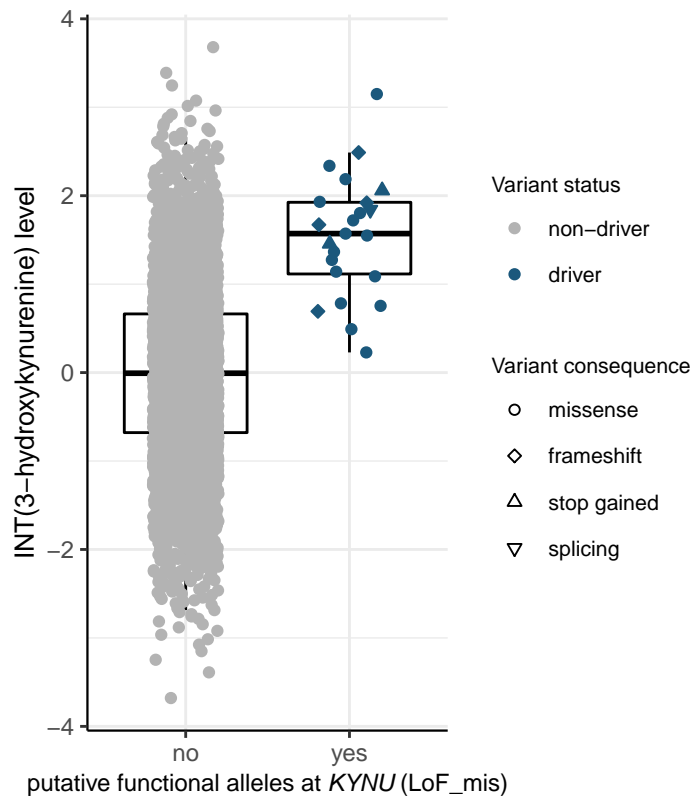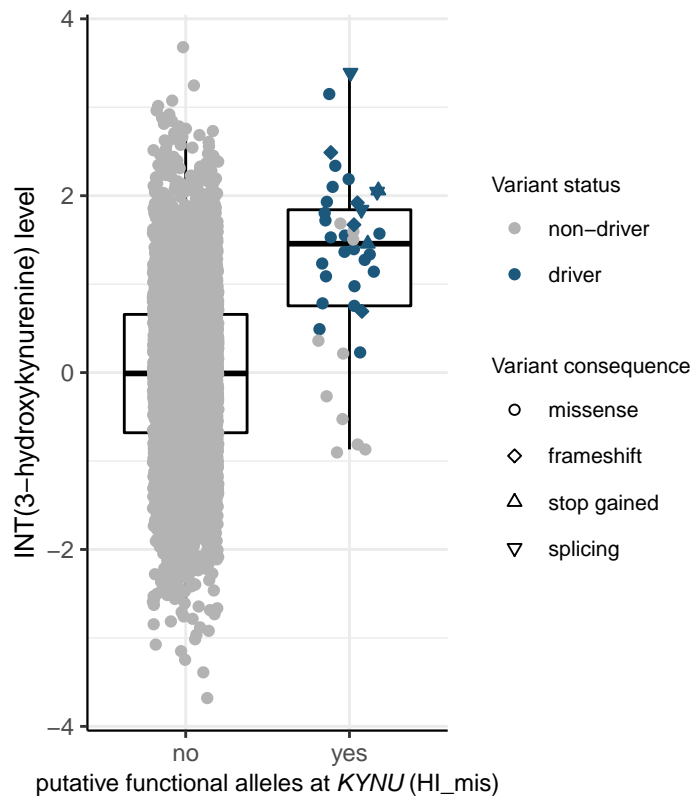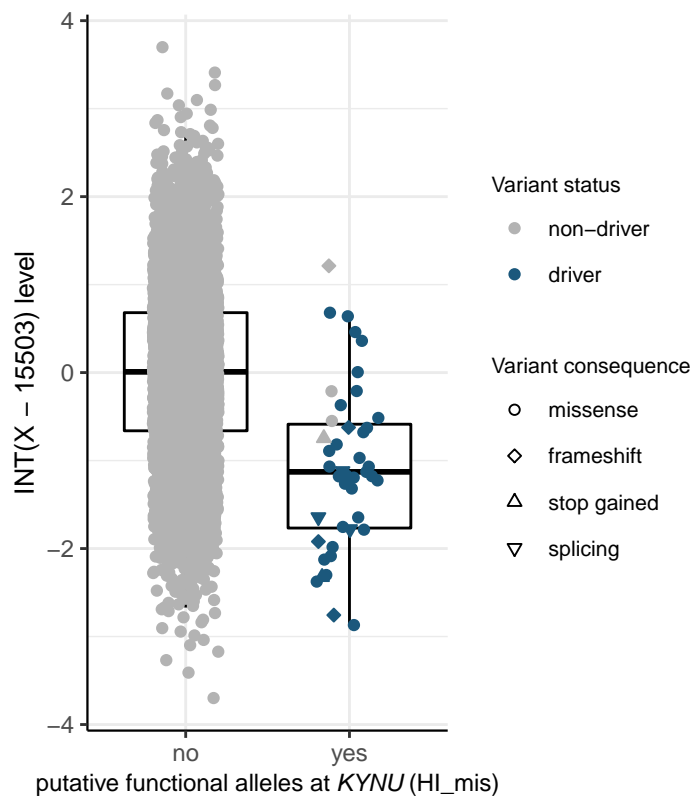

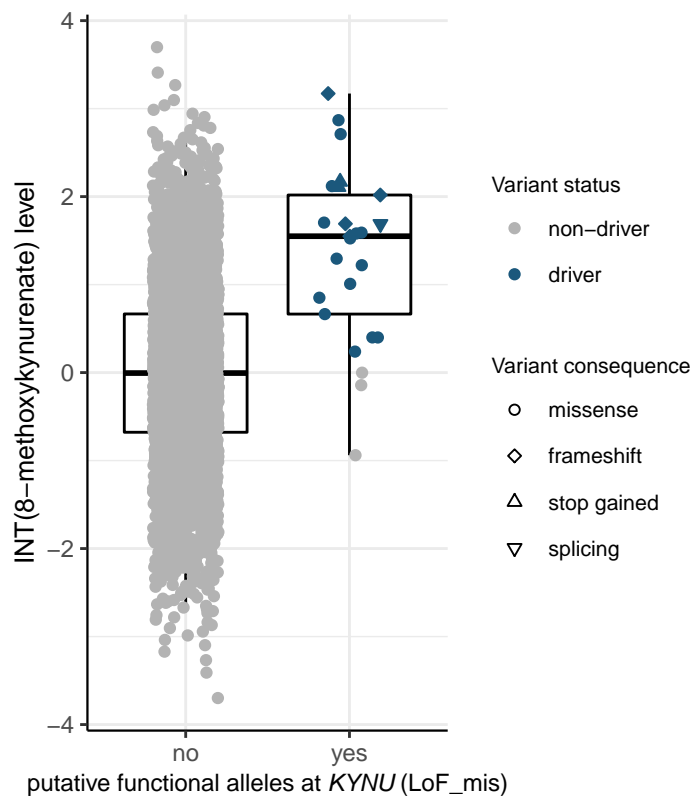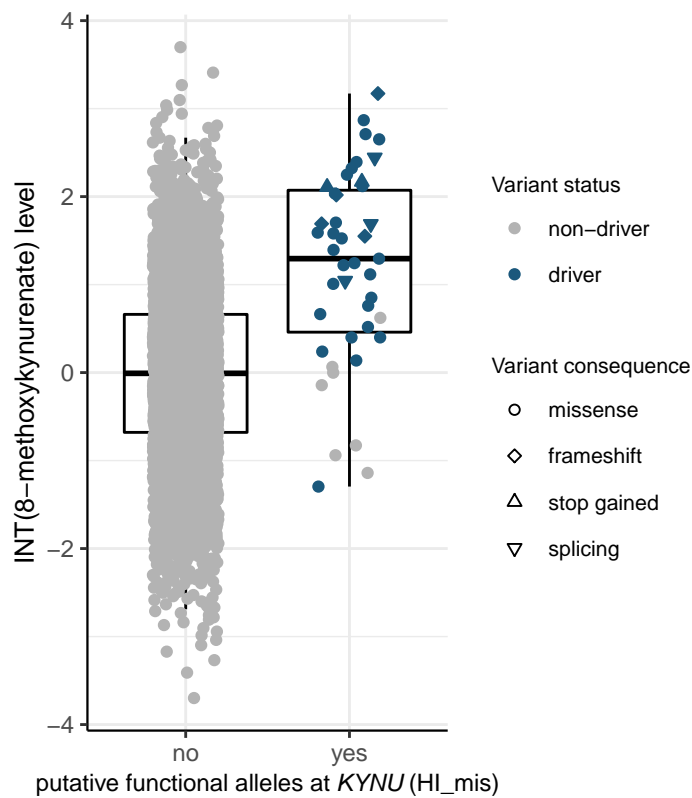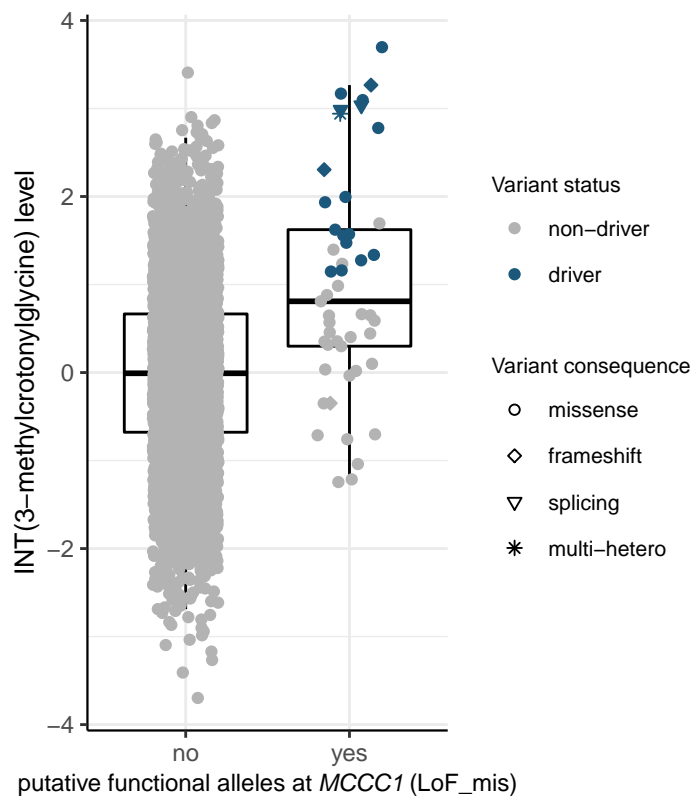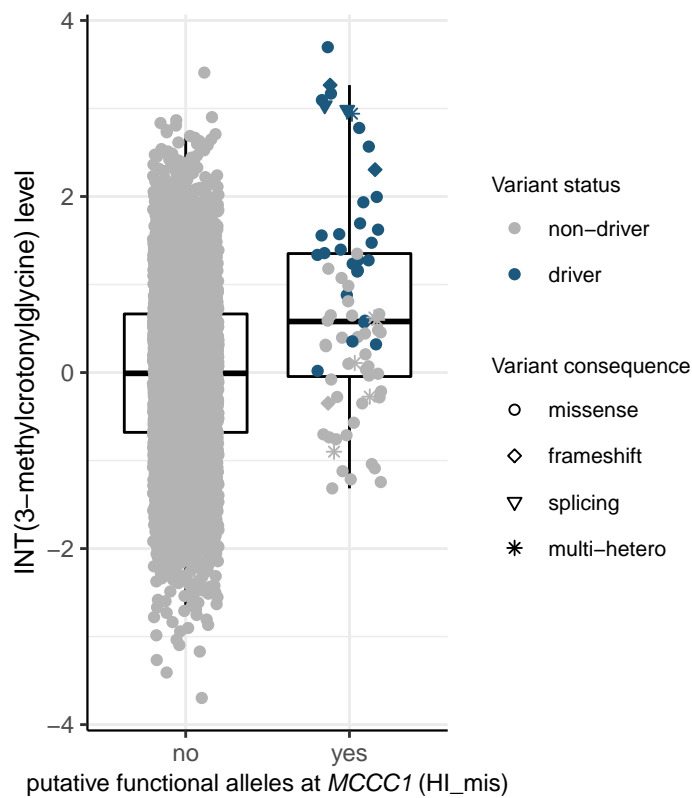



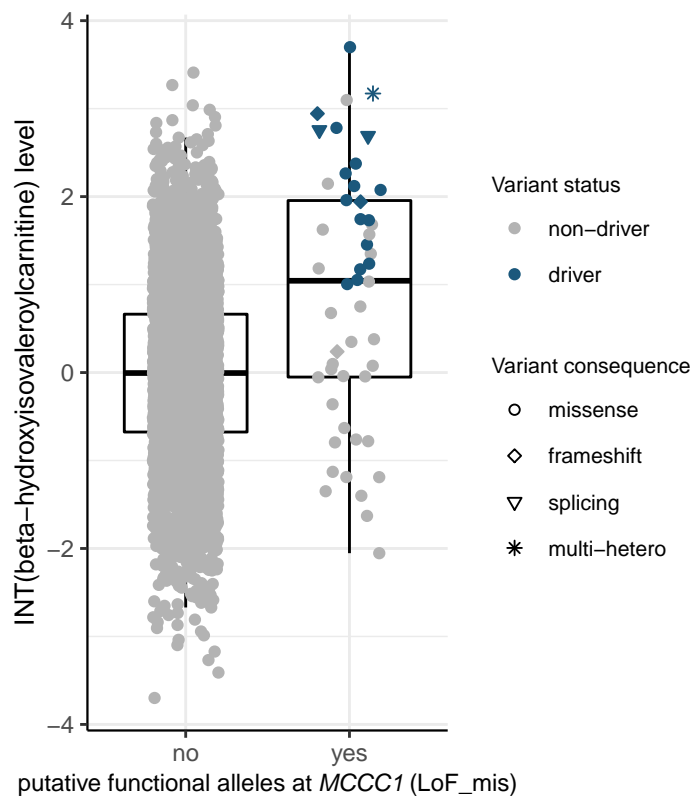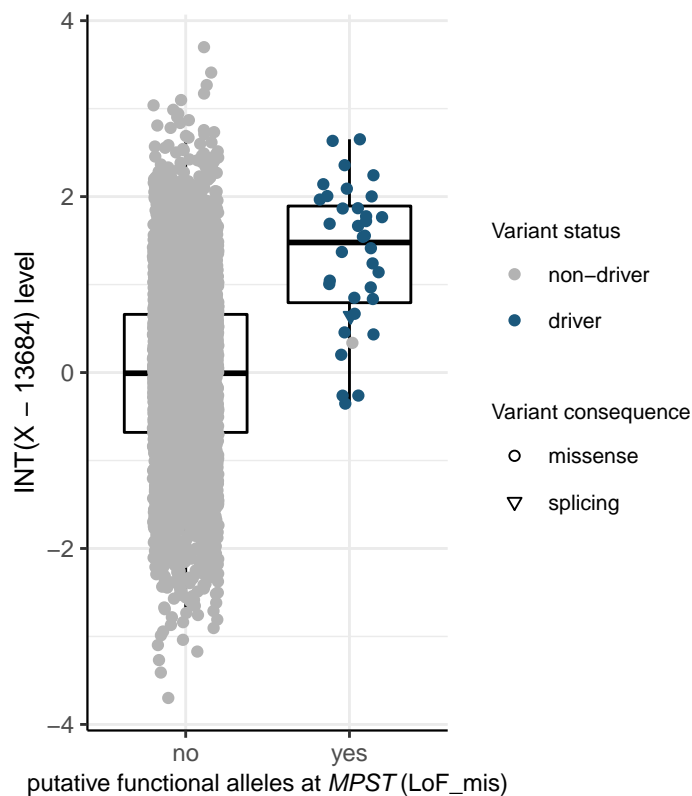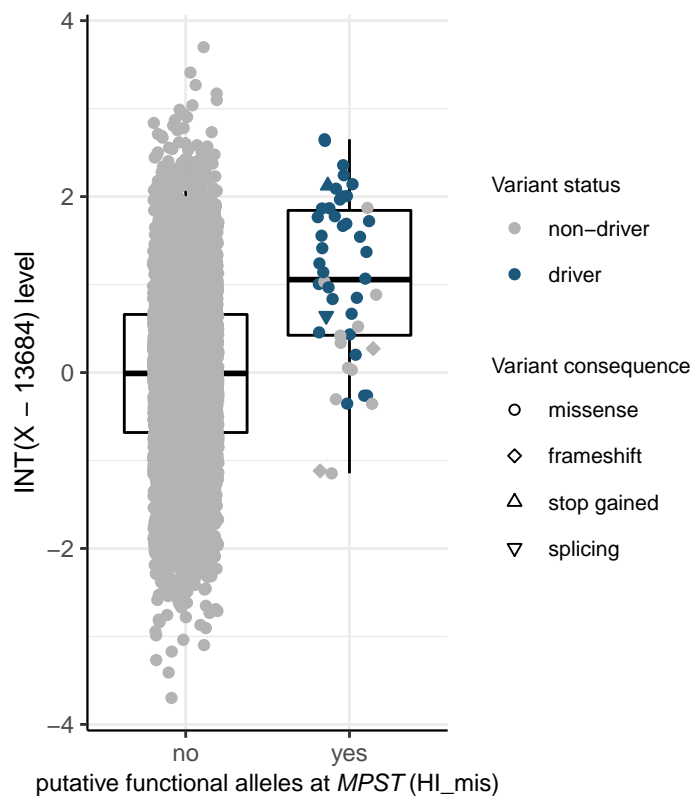

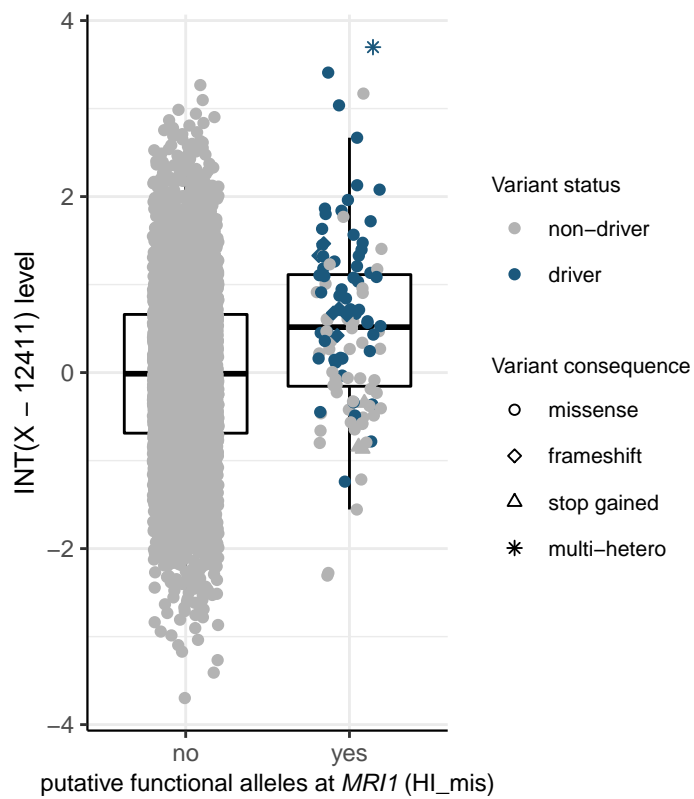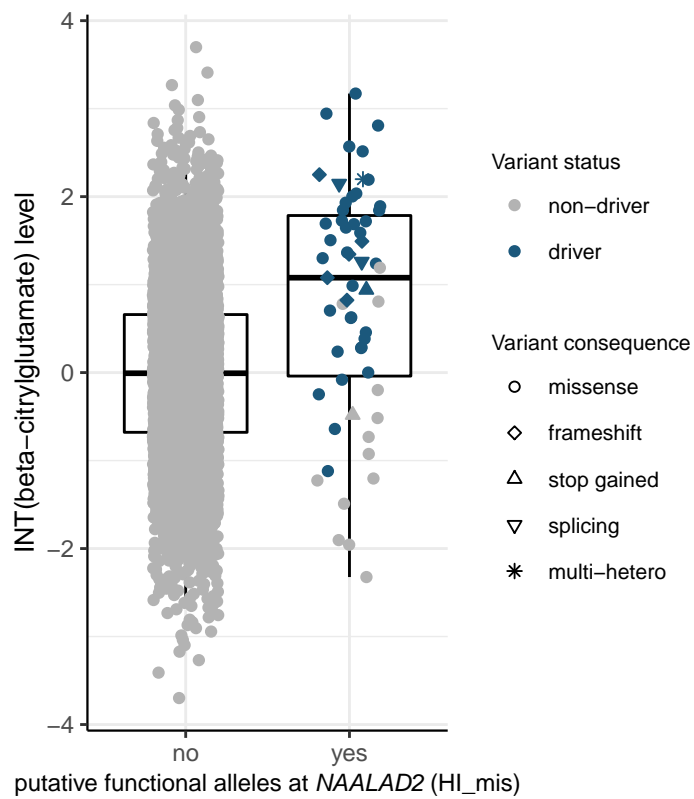

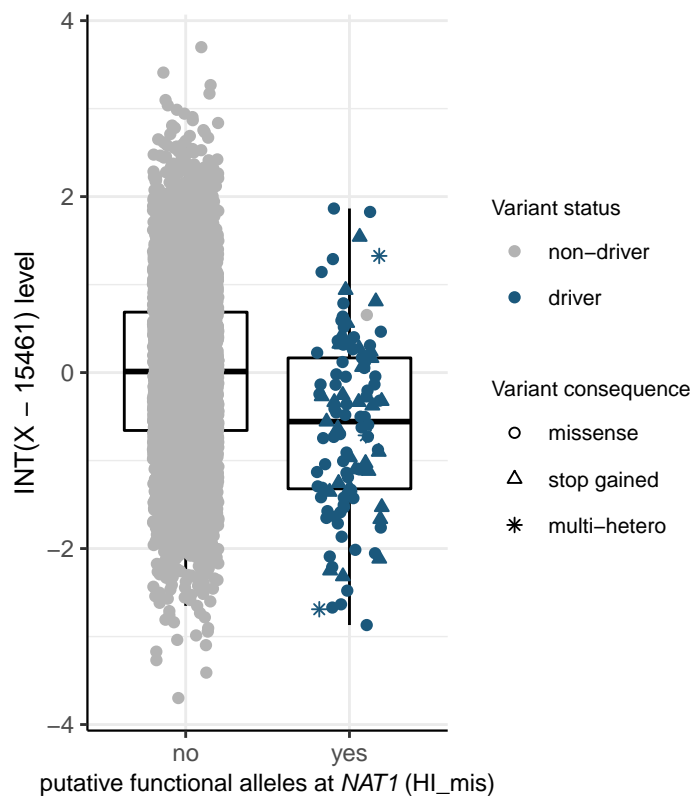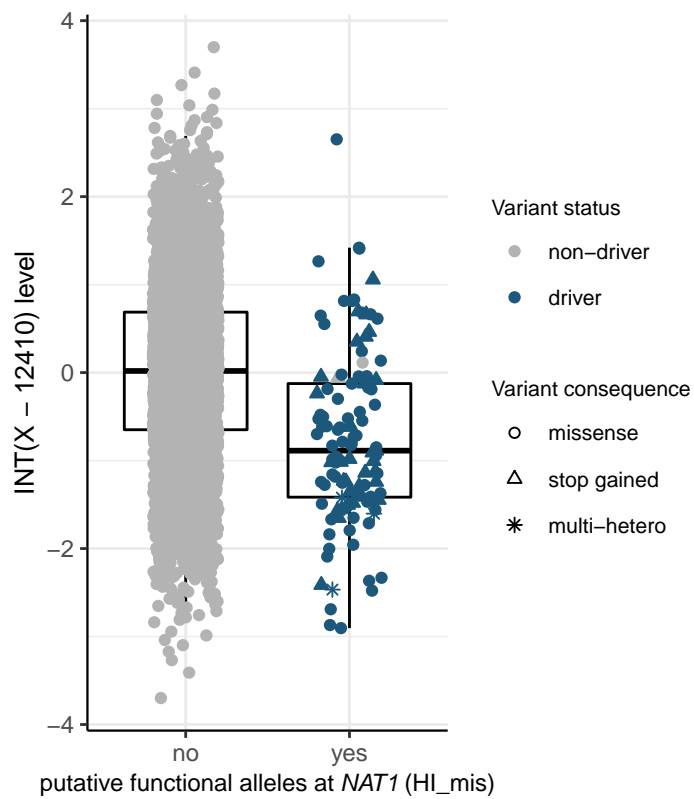

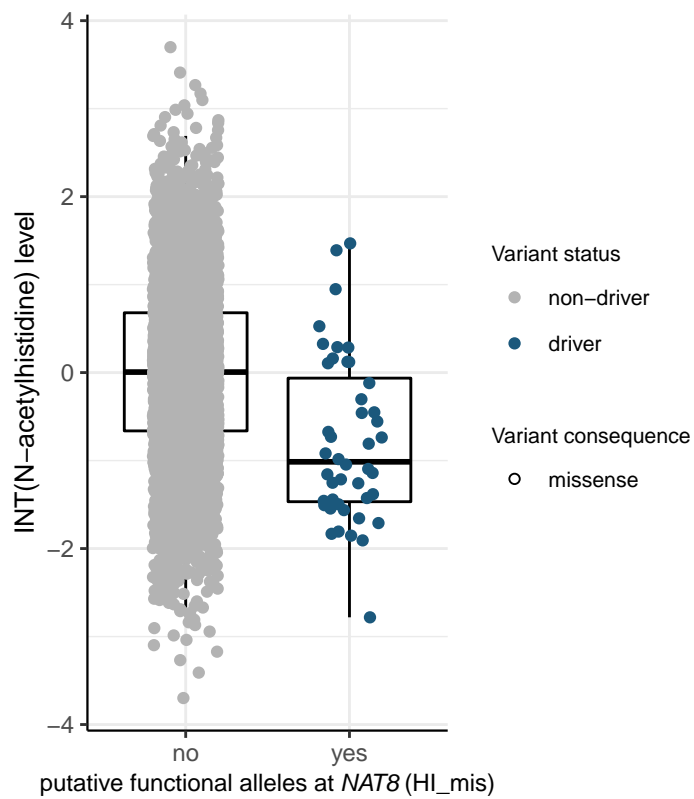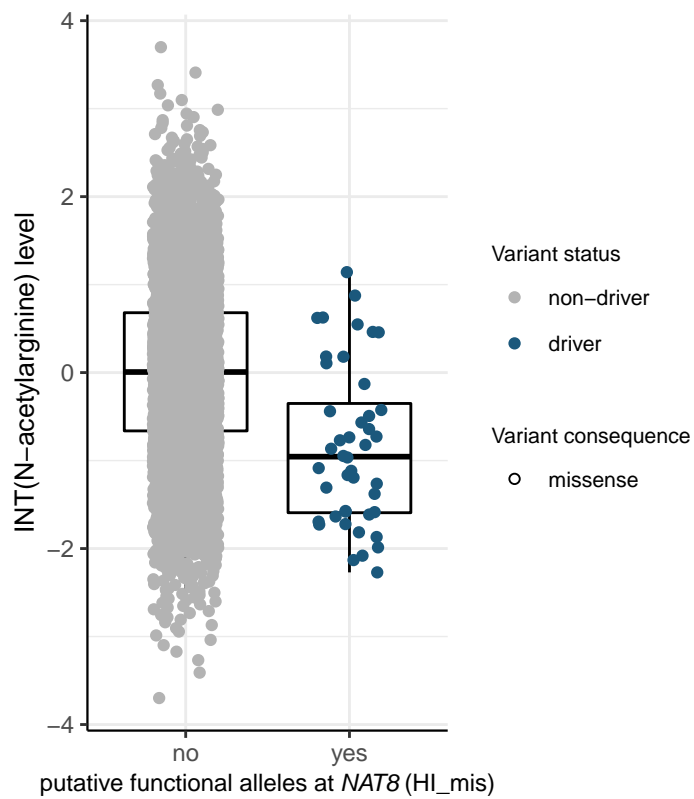

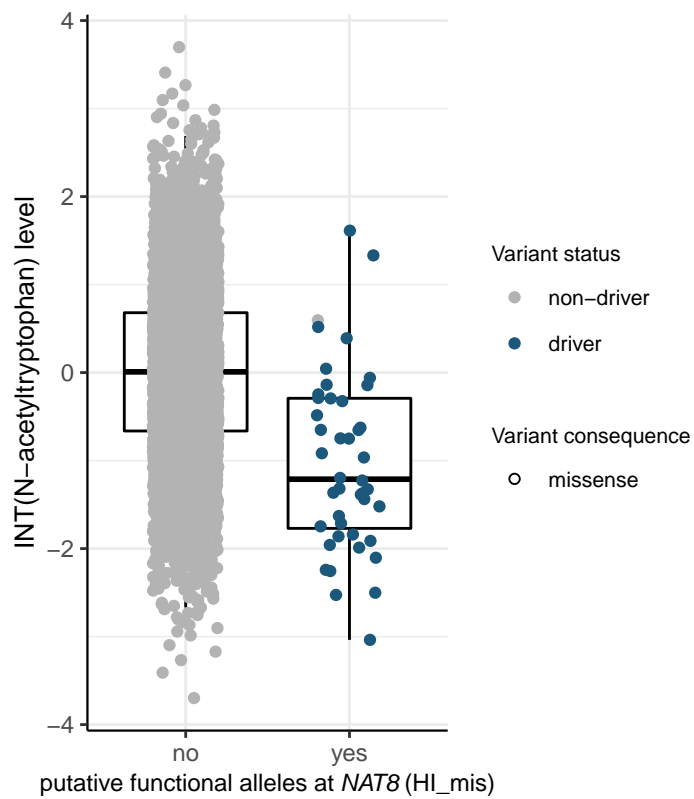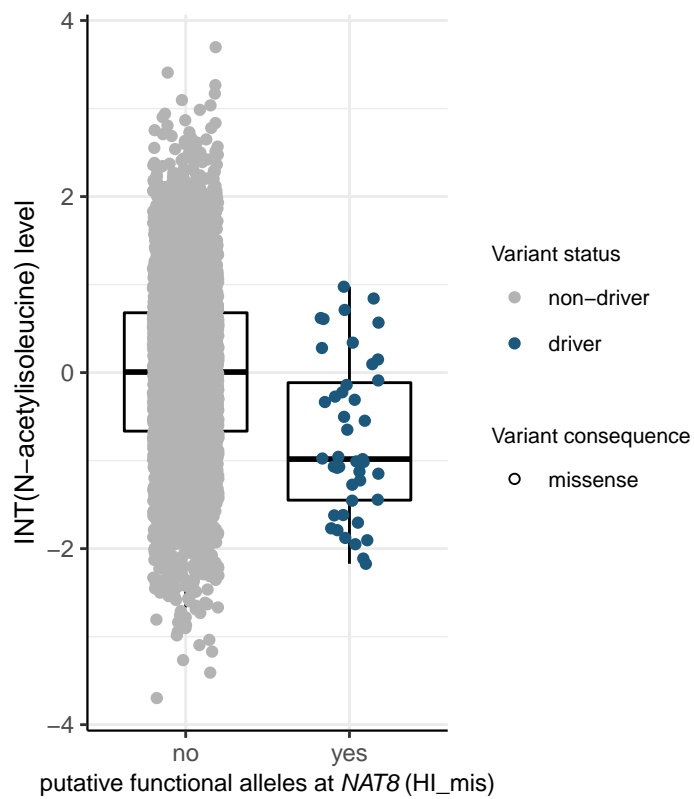

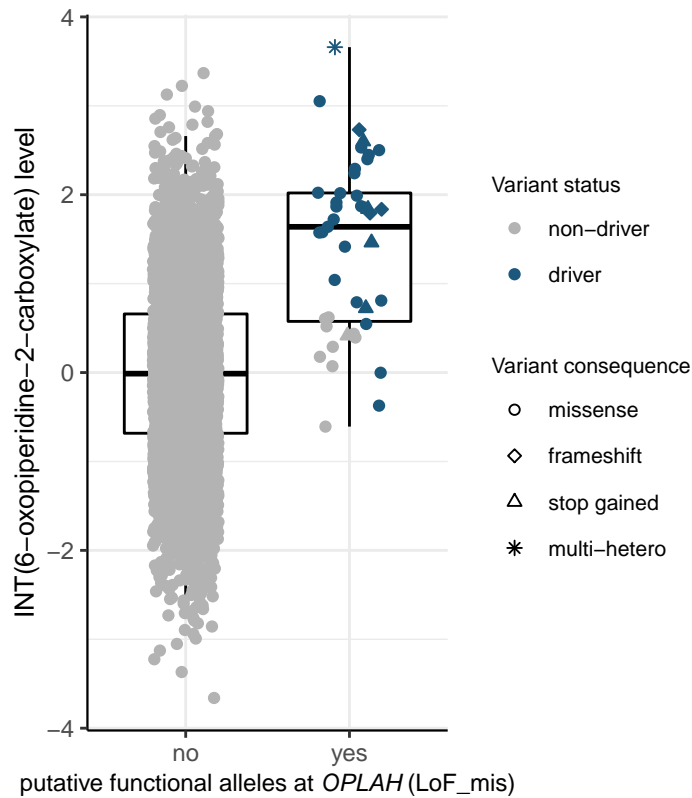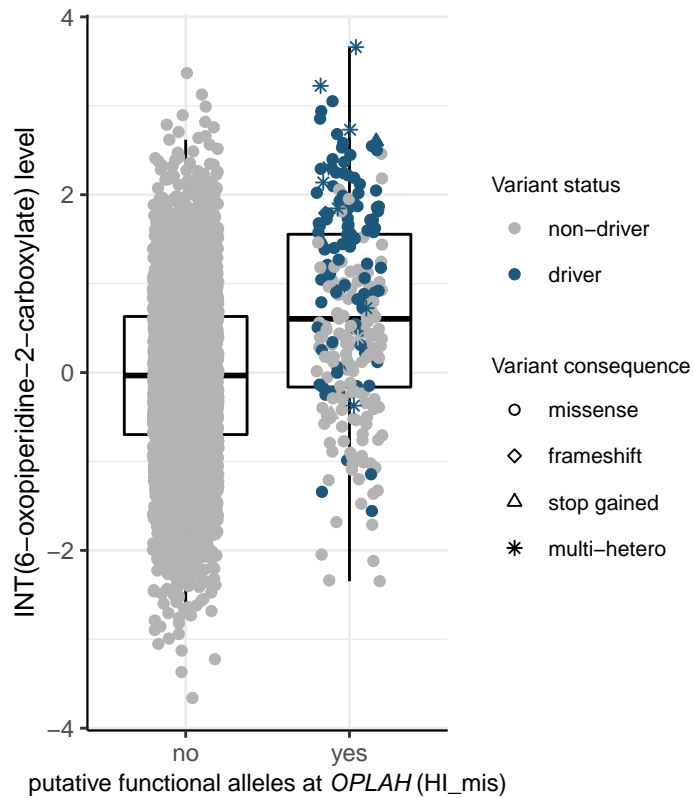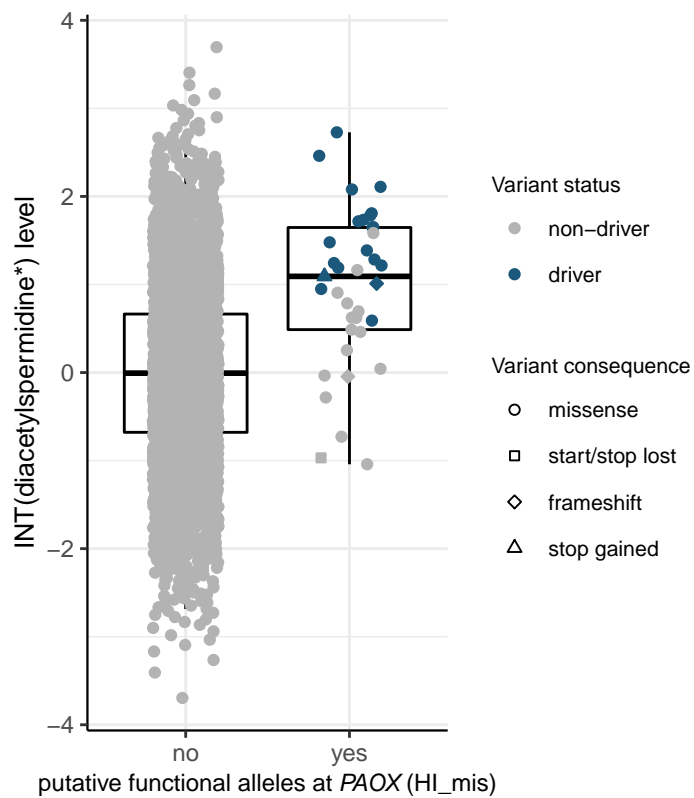

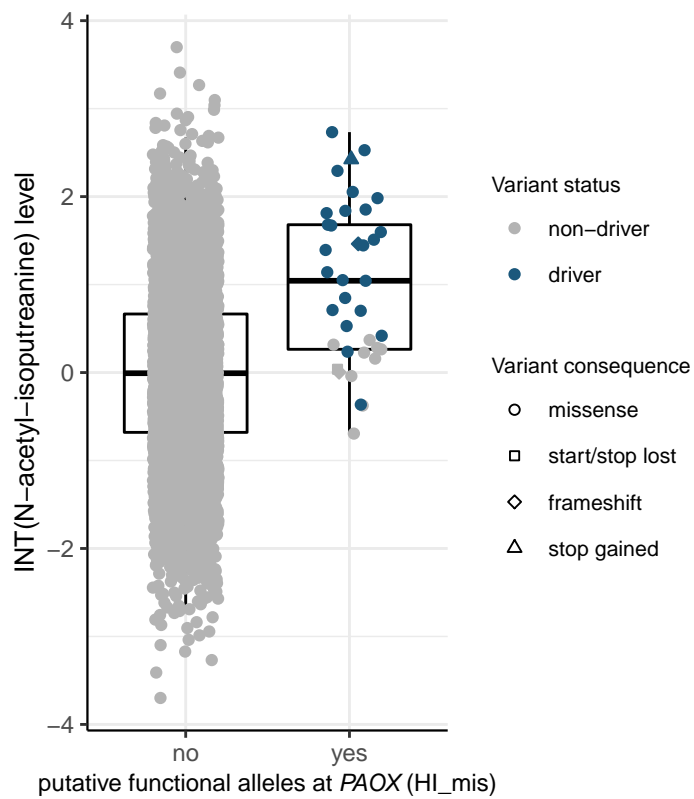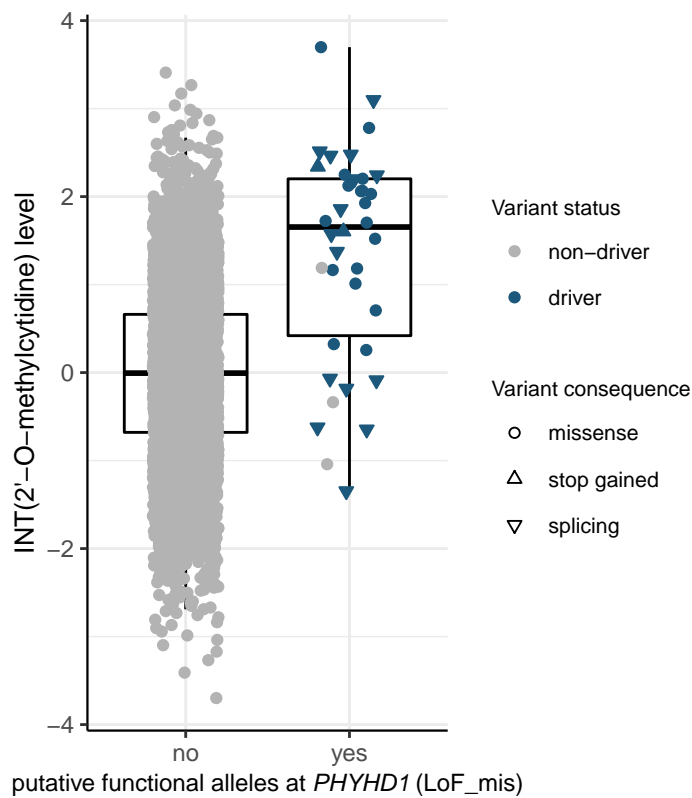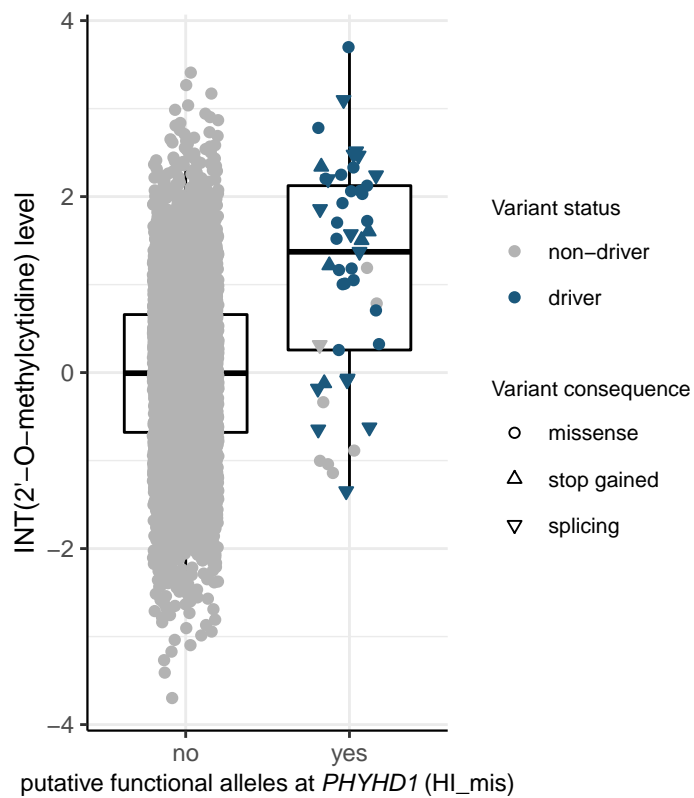

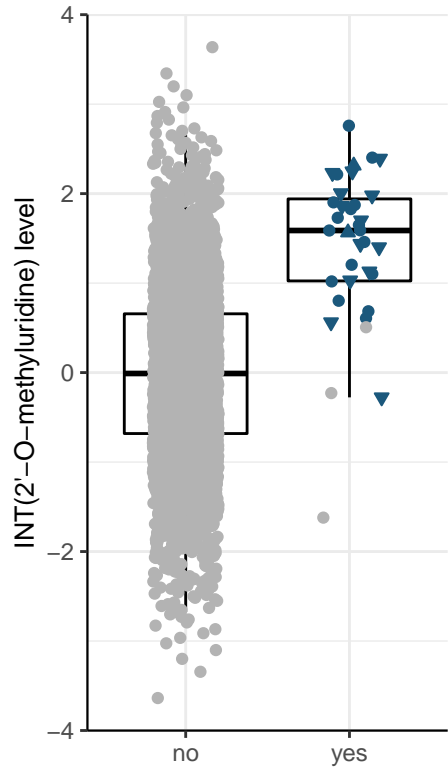

Variant status

- non-driver
- driver

Variant consequence

- missense
- △ stop gained
- ▽ splicing

putative functional alleles at *PHYHD1* (LoF\_mis)

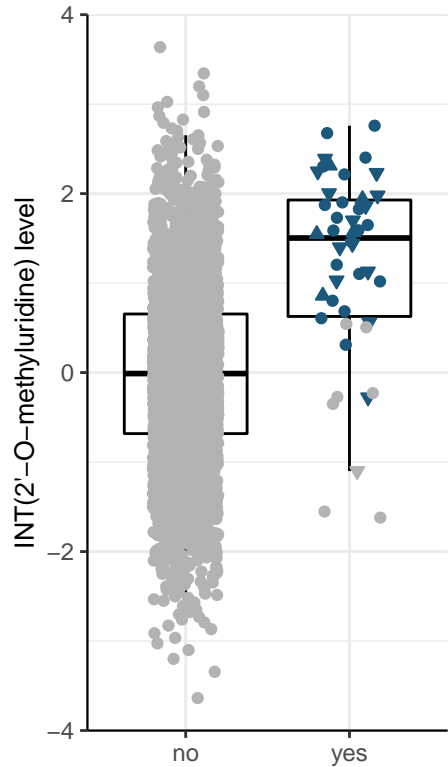

Variant status

- non-driver
- driver

Variant consequence

- missense
- △ stop gained
- ▽ splicing

putative functional alleles at *PHYHD1* (HI\_mis)

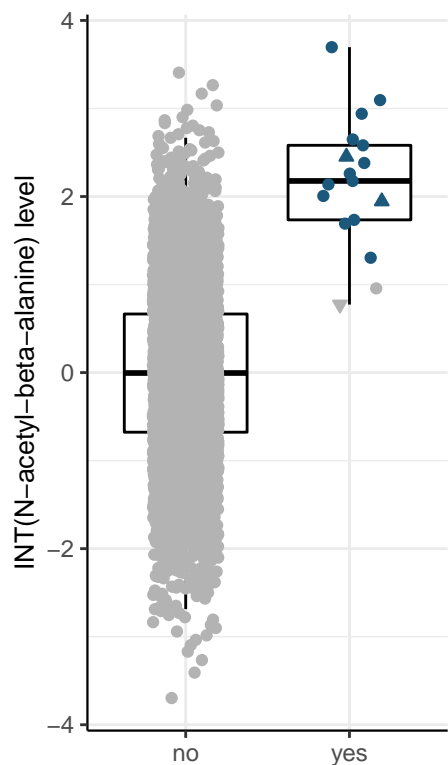

Variant status

- non-driver
- driver

Variant consequence

- missense
- △ stop gained
- ▽ splicing

putative functional alleles at *PTER* (LoF\_mis)

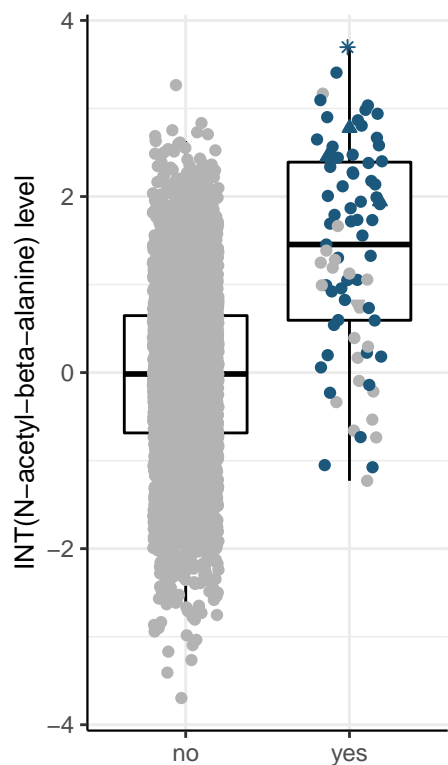

Variant status

- non-driver
- driver

Variant consequence

- missense
- △ stop gained
- ▽ splicing
- \* multi-hetero

putative functional alleles at *PTER* (HI\_mis)



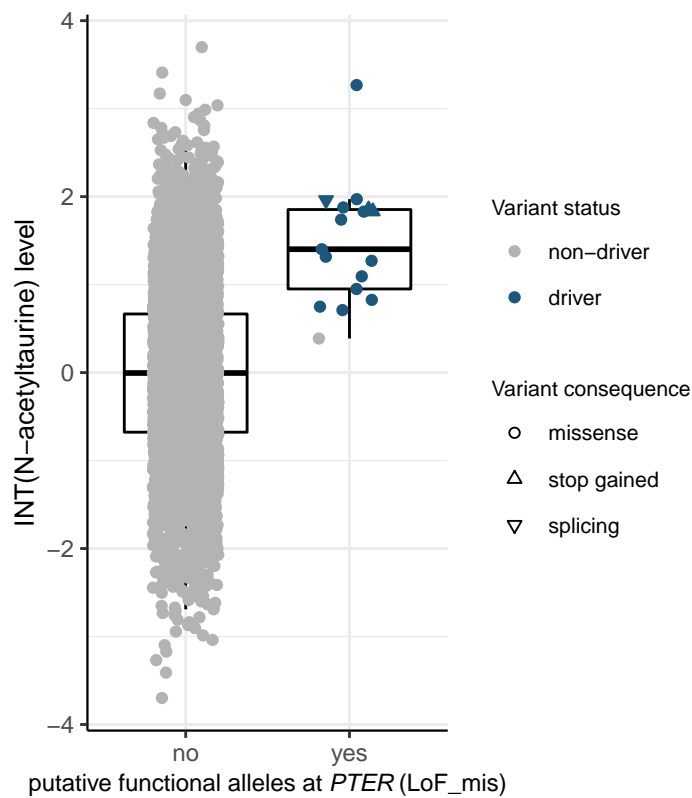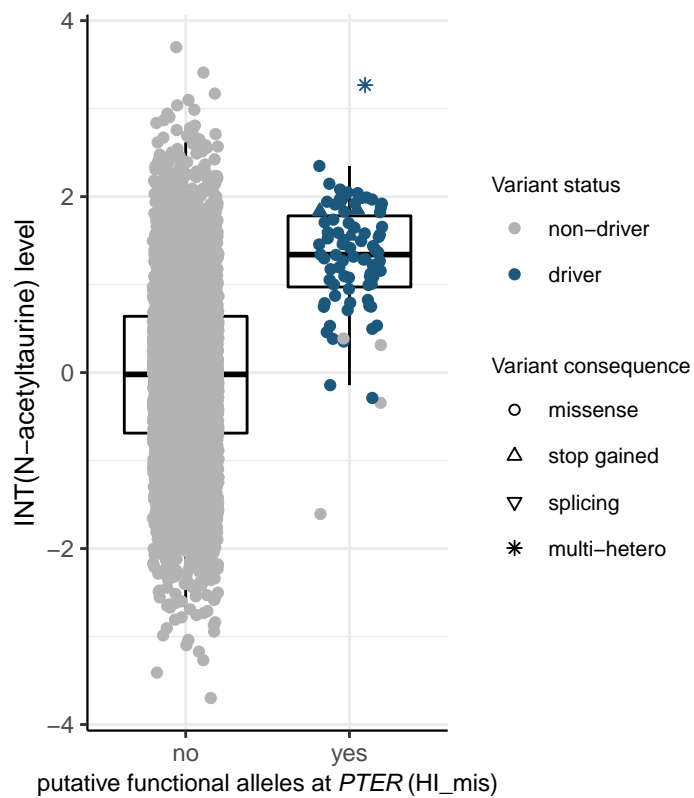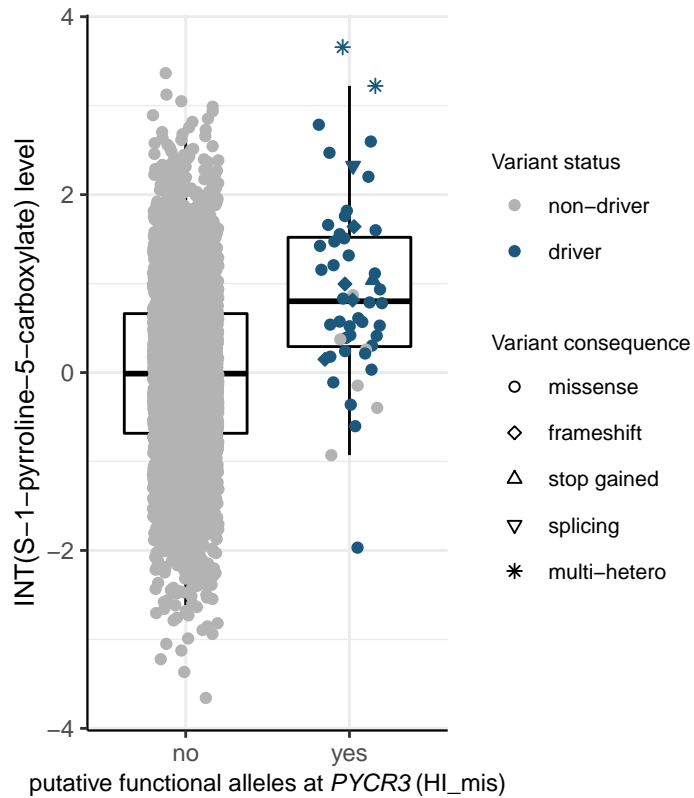

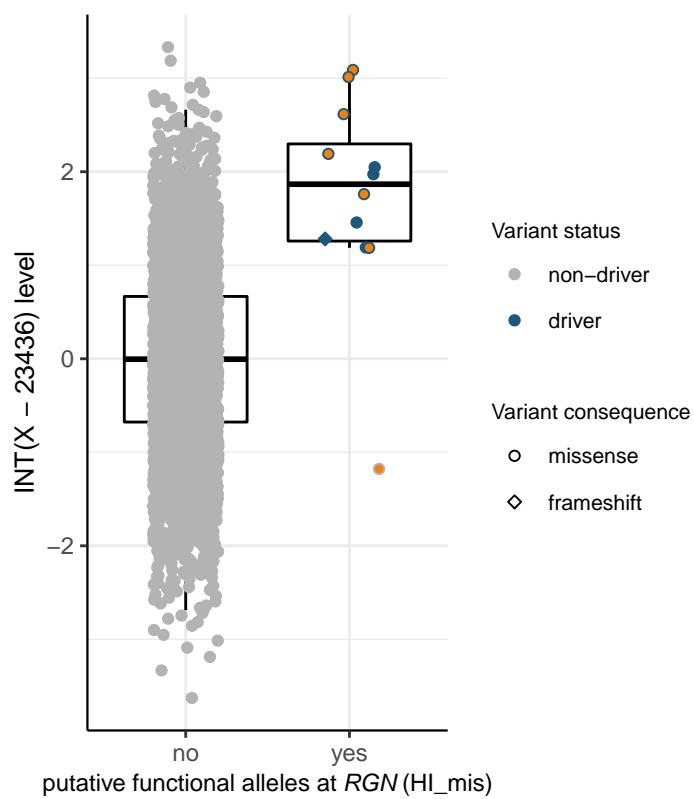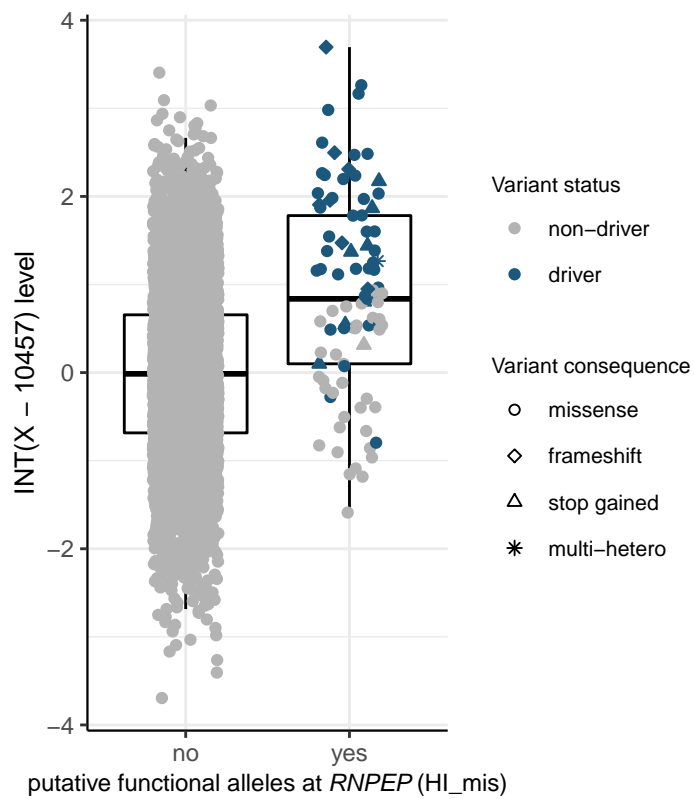

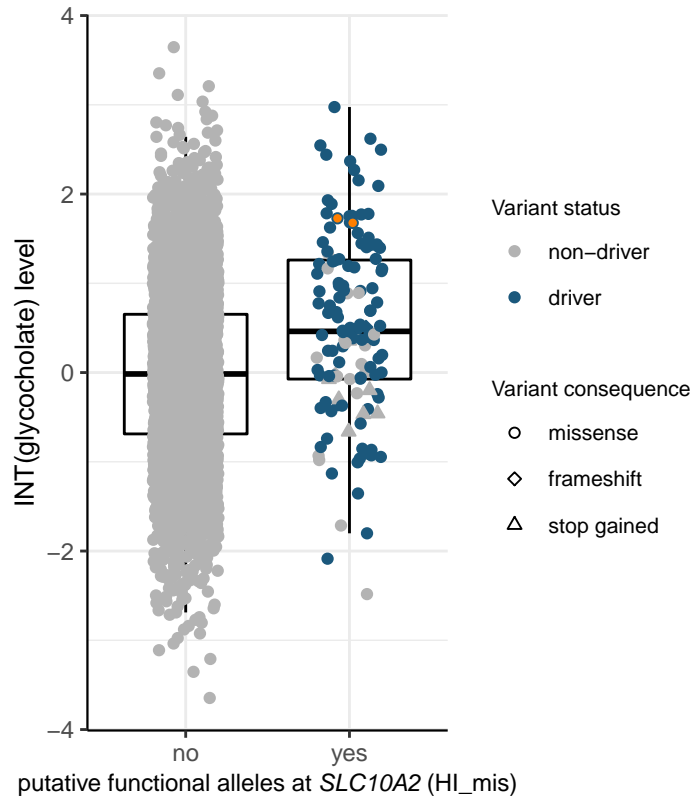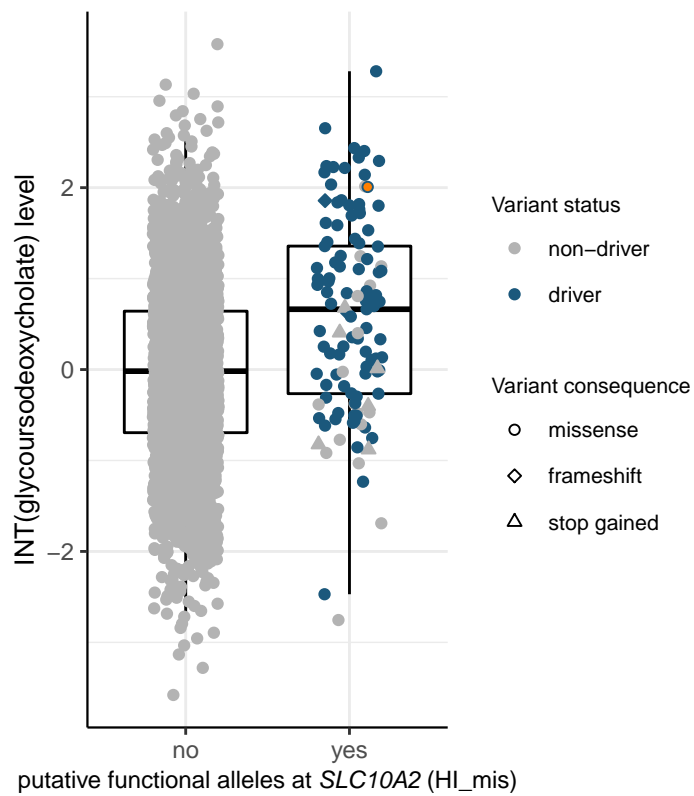

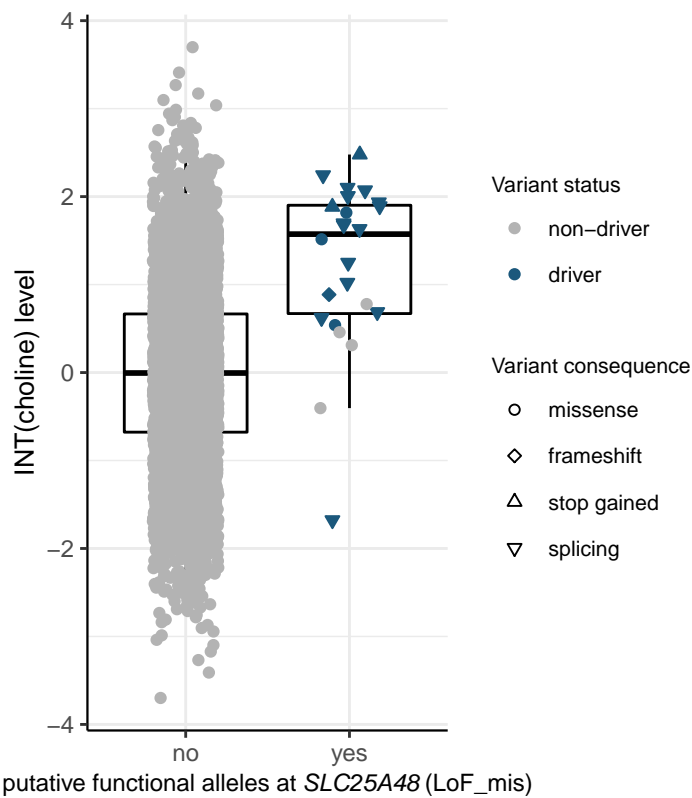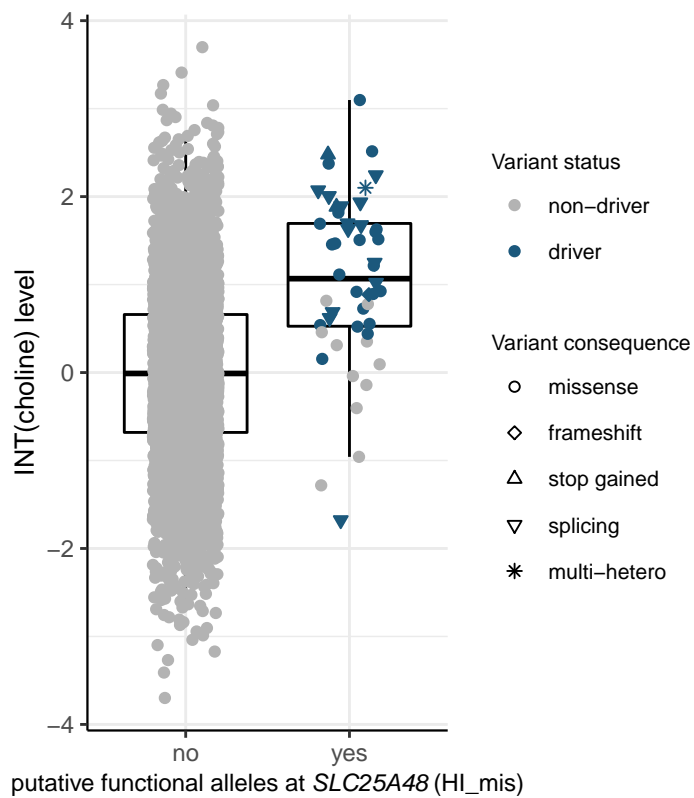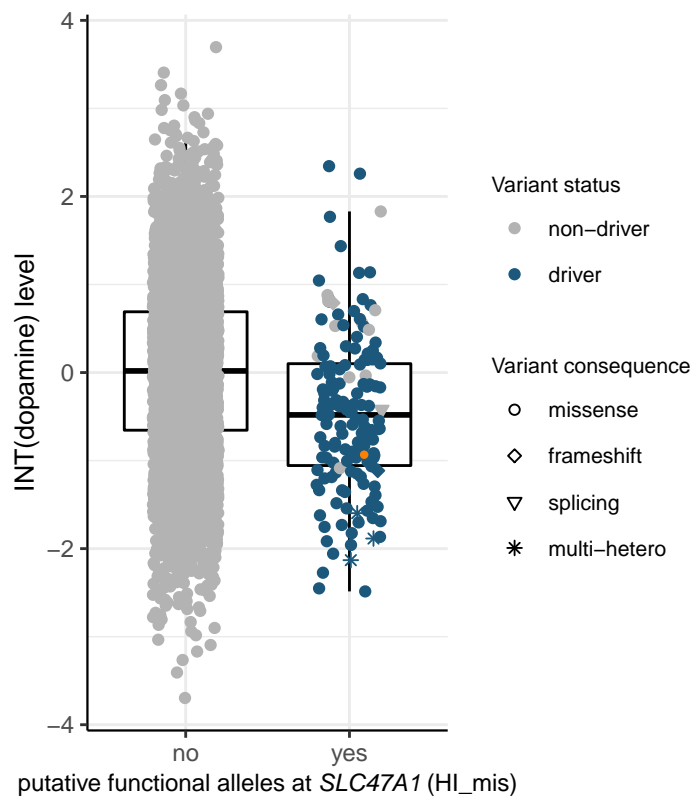

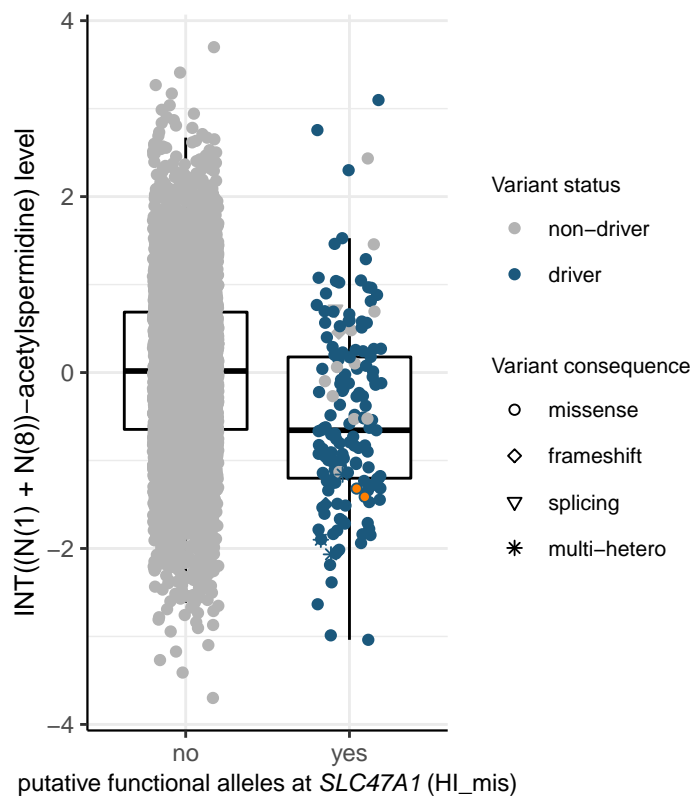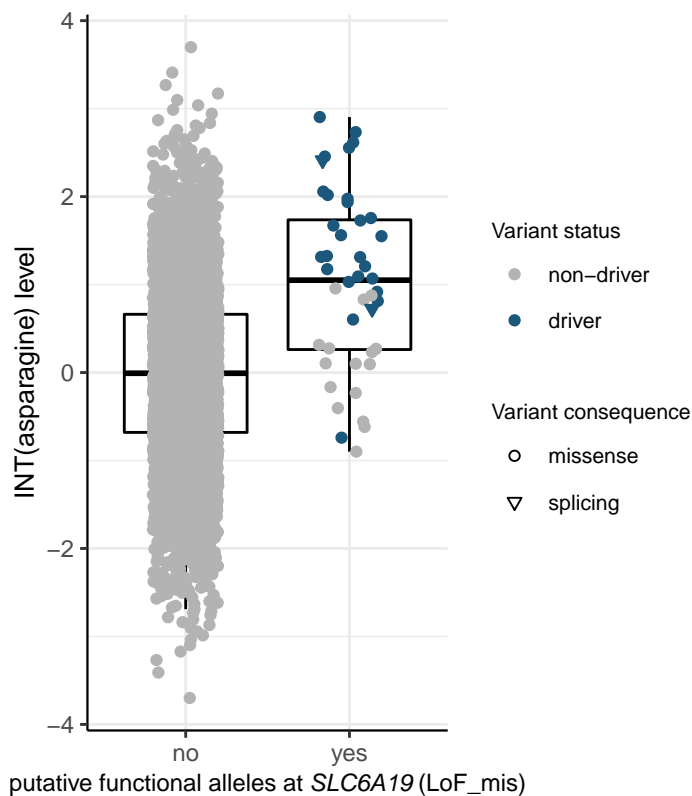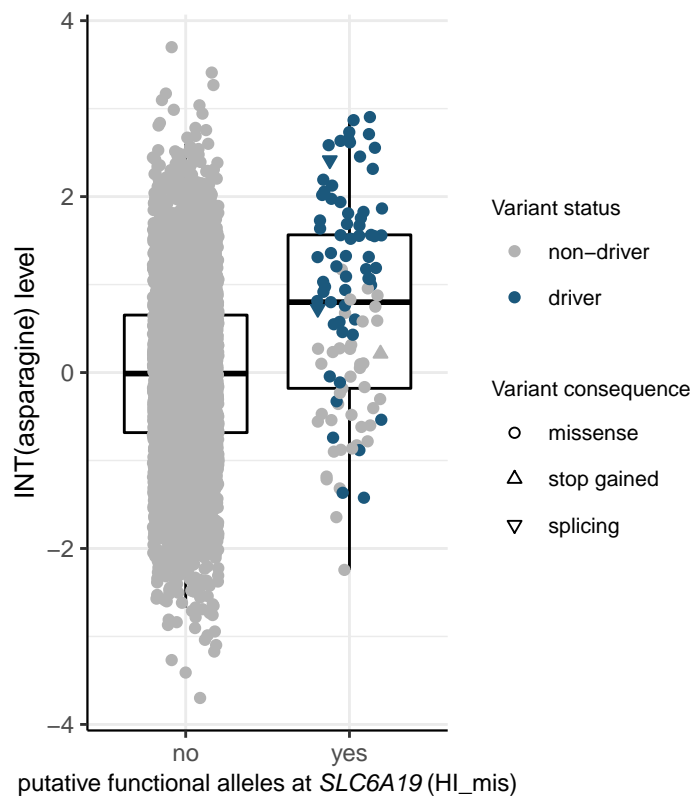

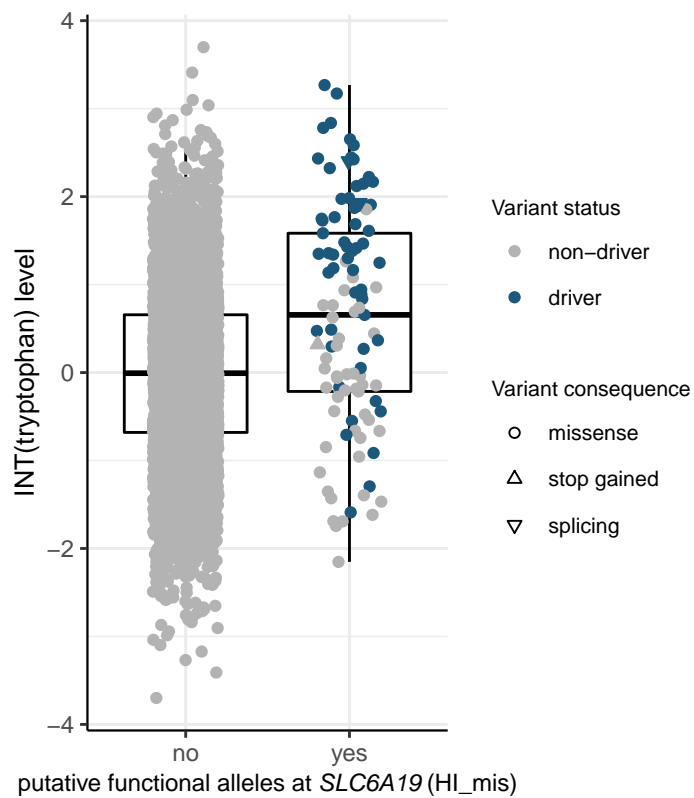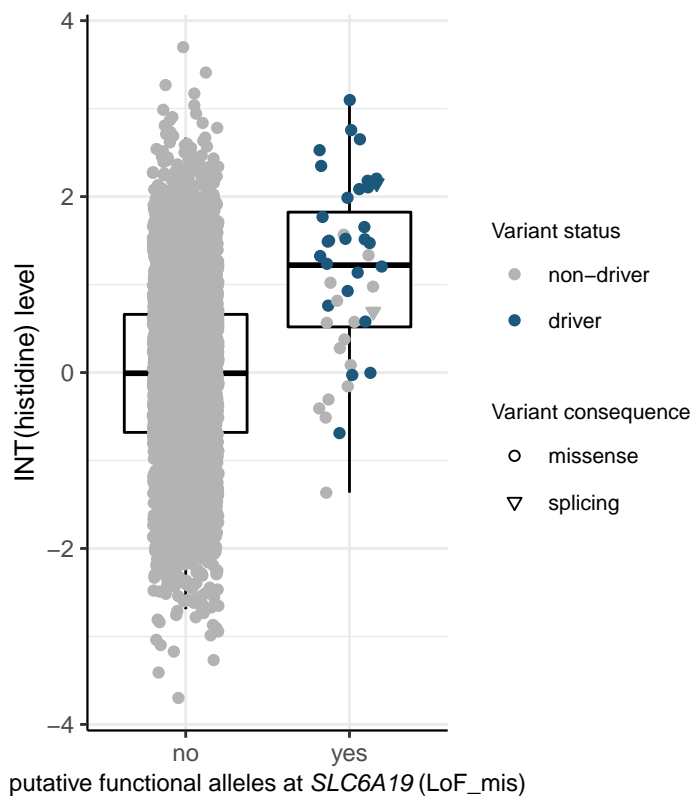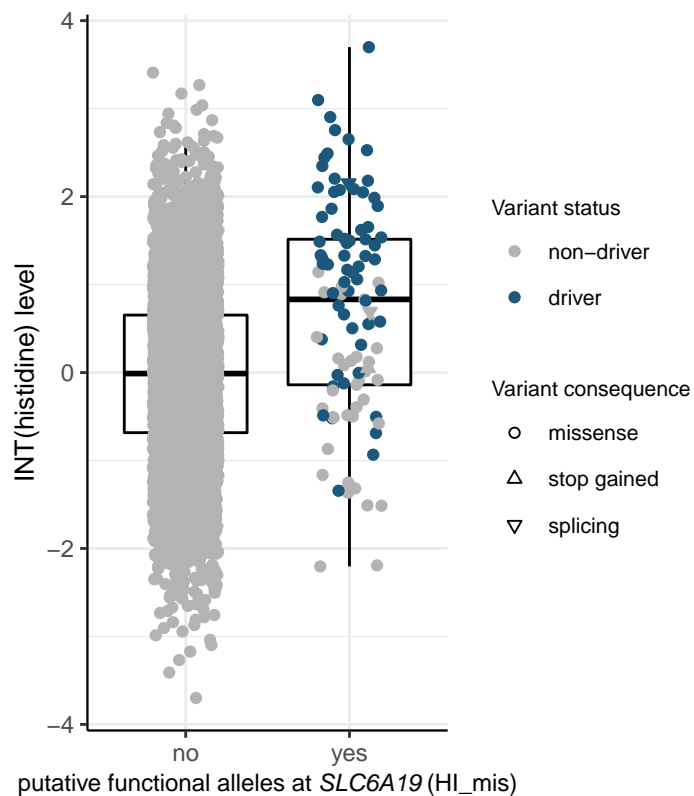

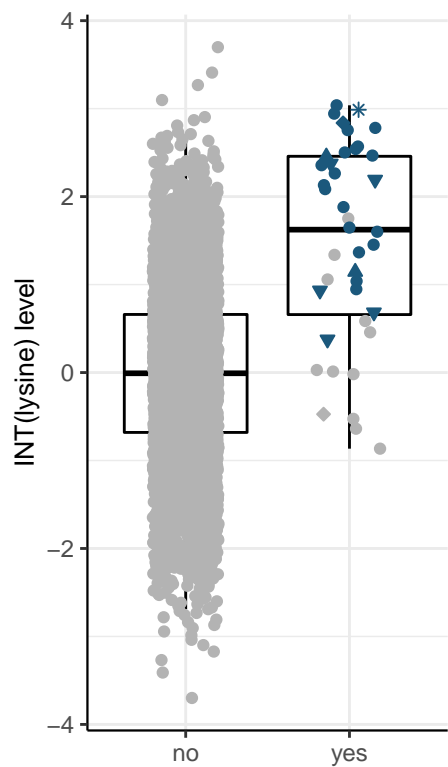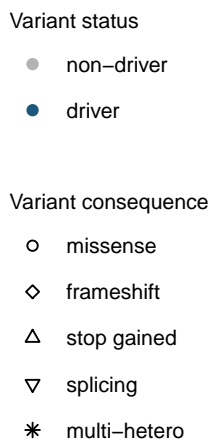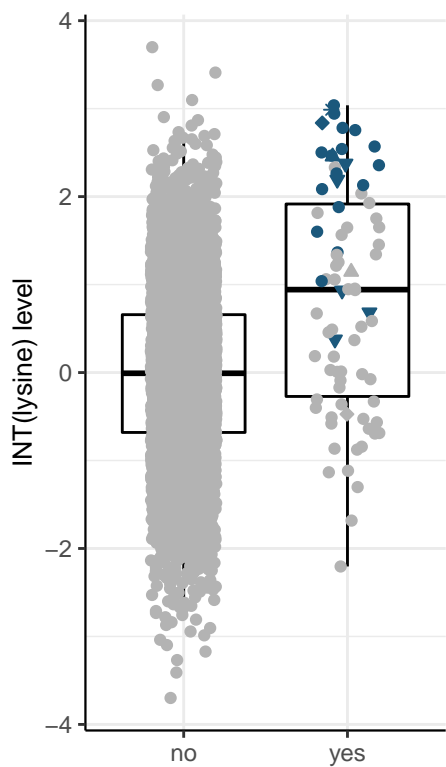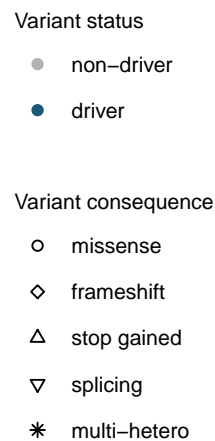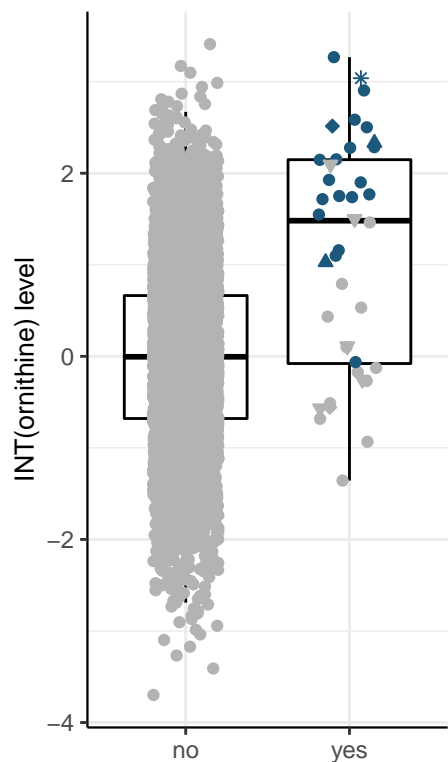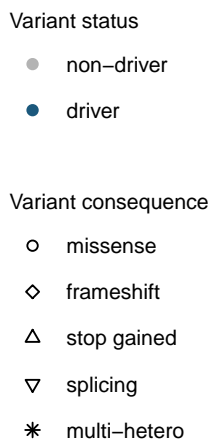

putative functional alleles at *SLC7A9* (LoF\_mis)

putative functional alleles at *SLC7A9* (HI\_mis)

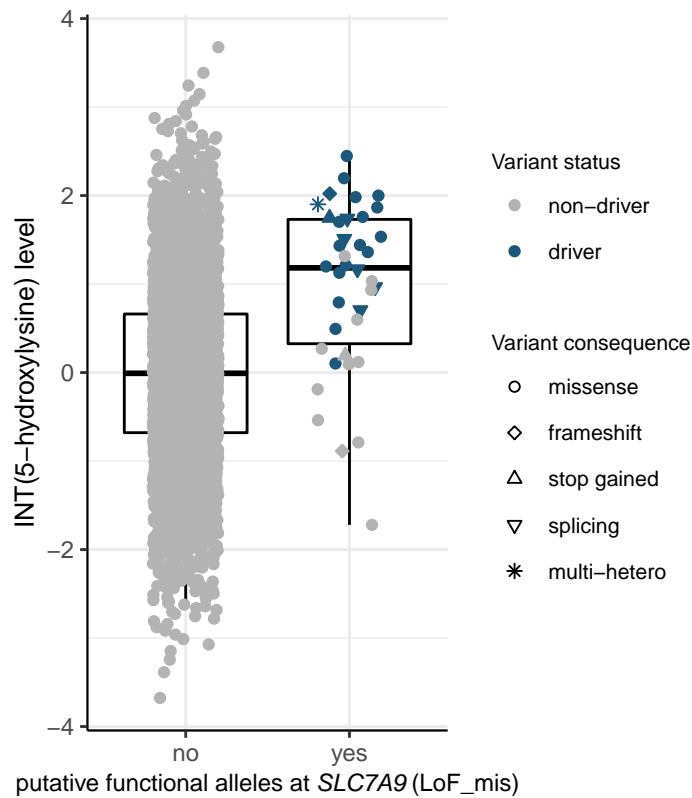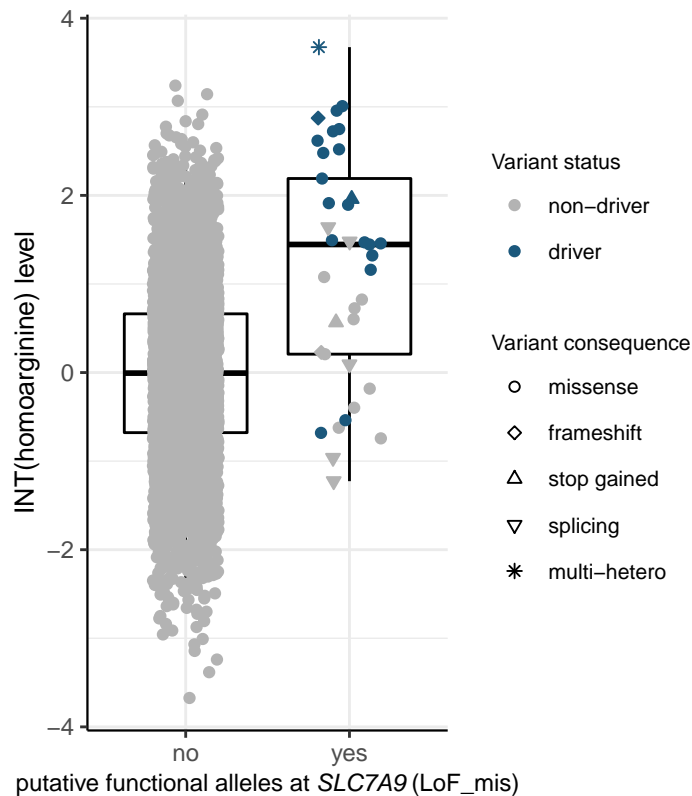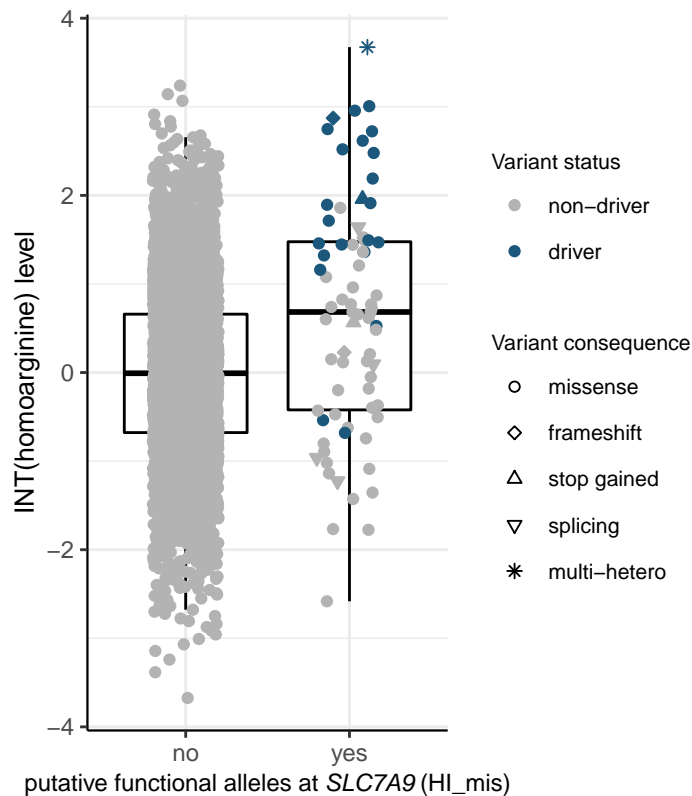



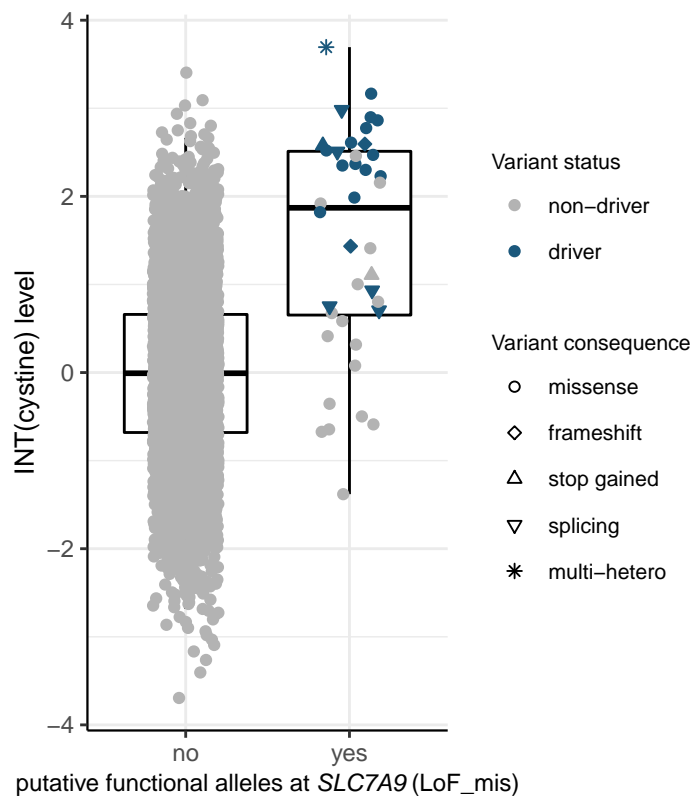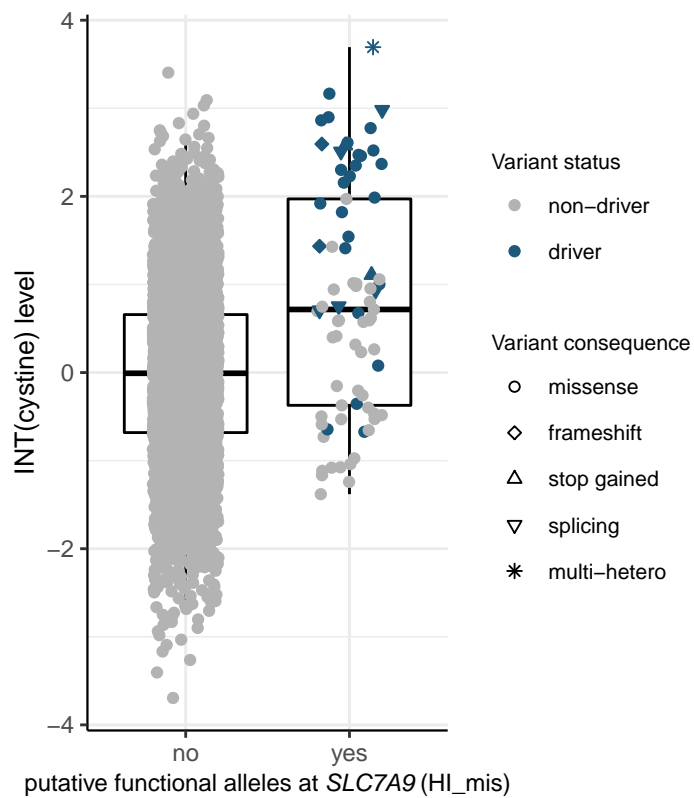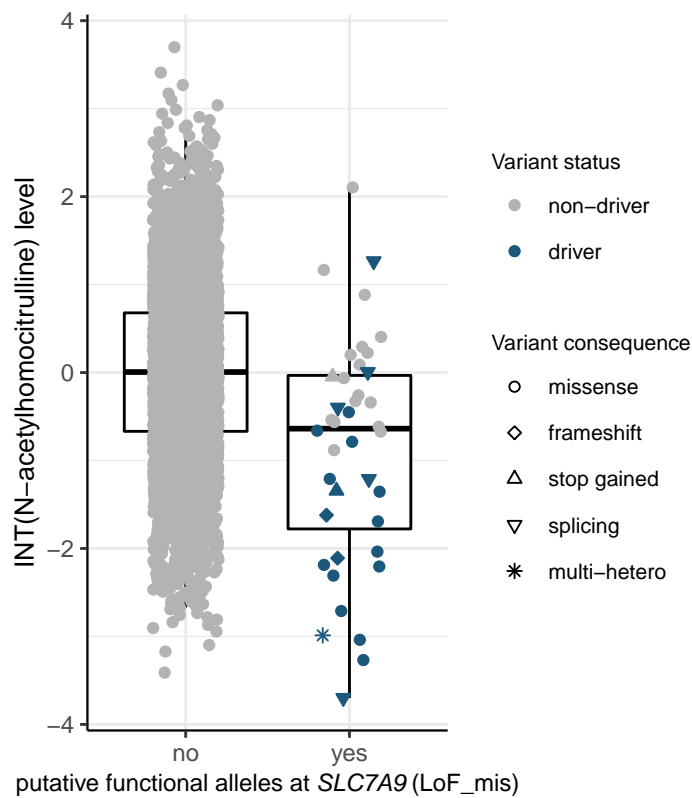

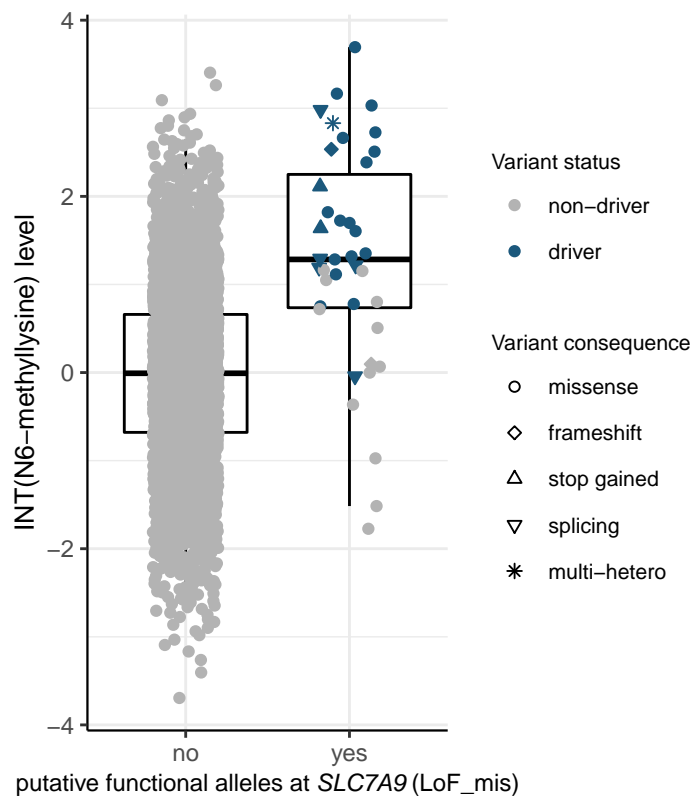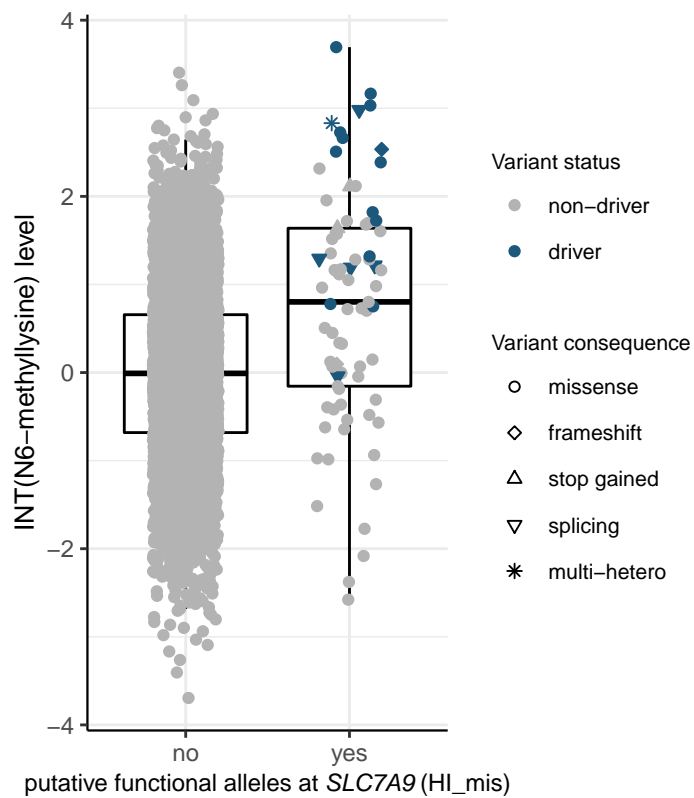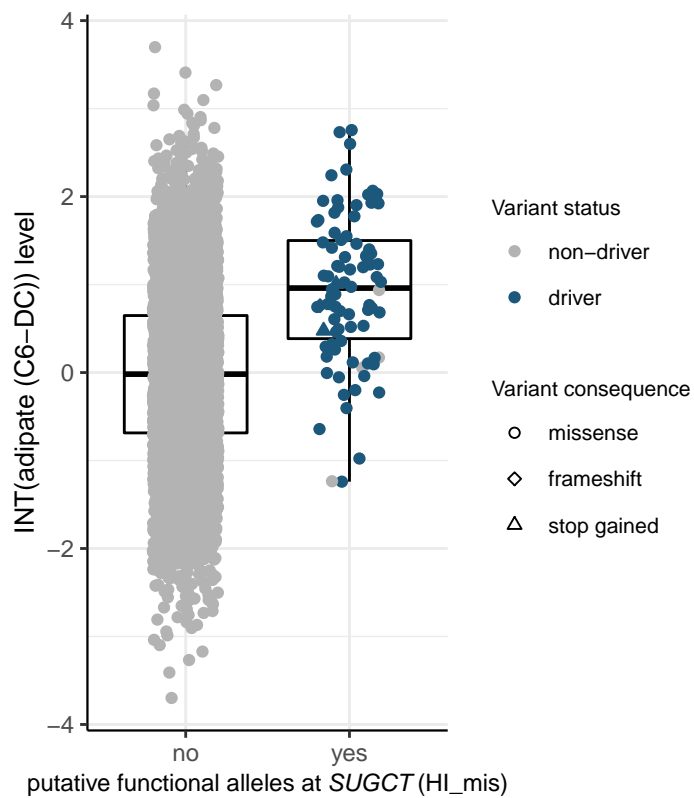

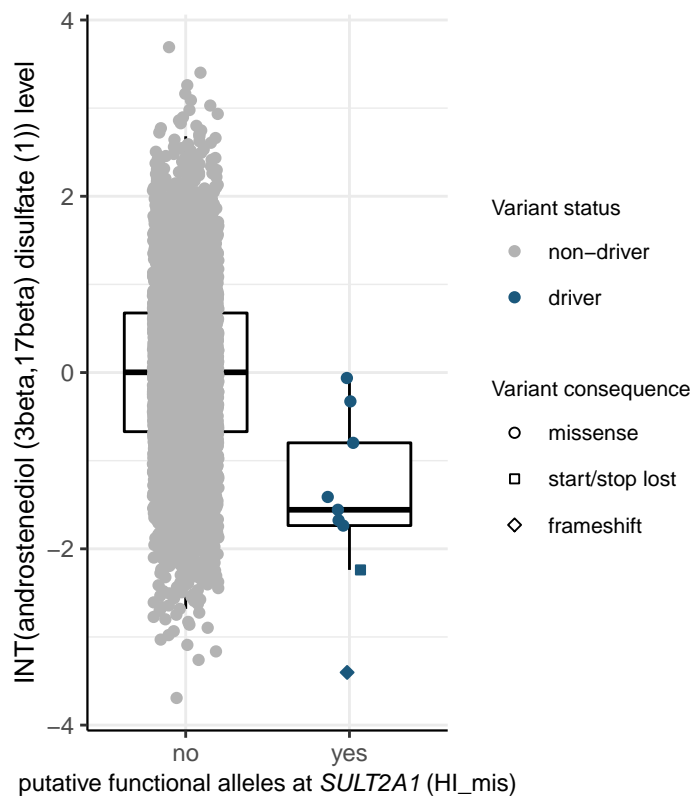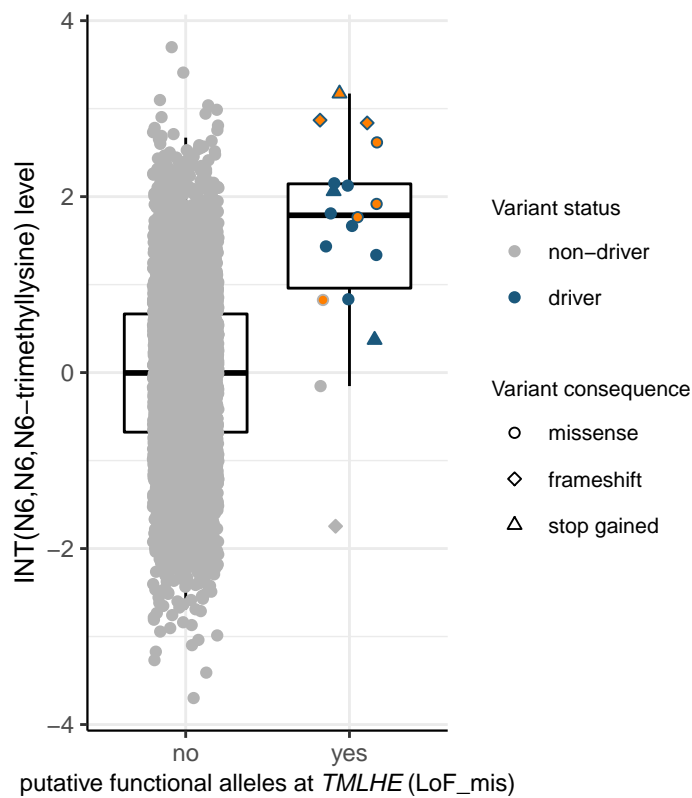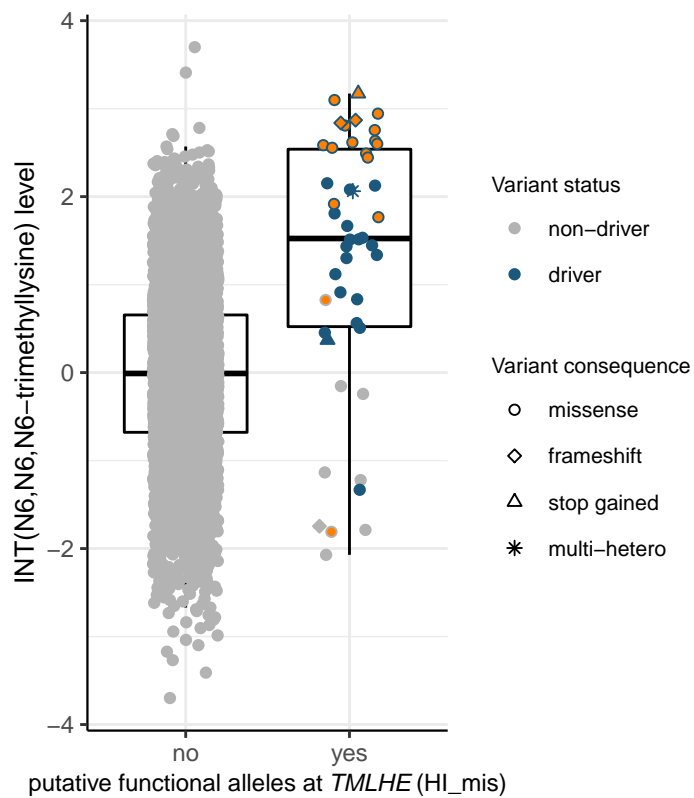

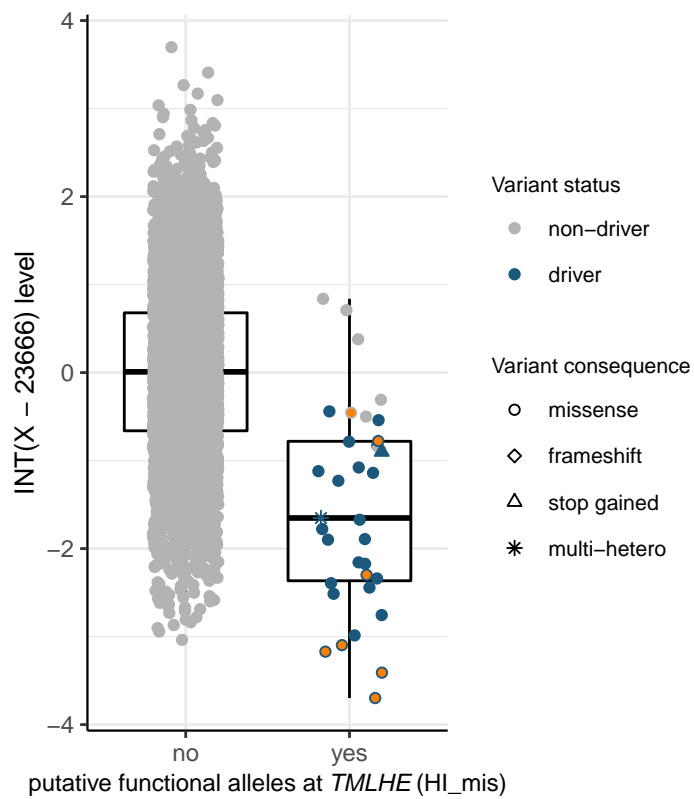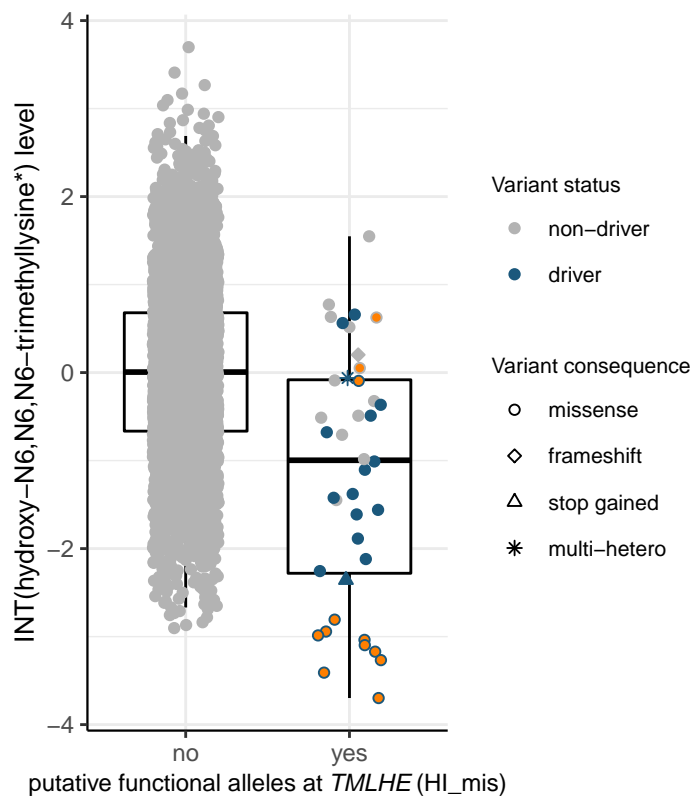

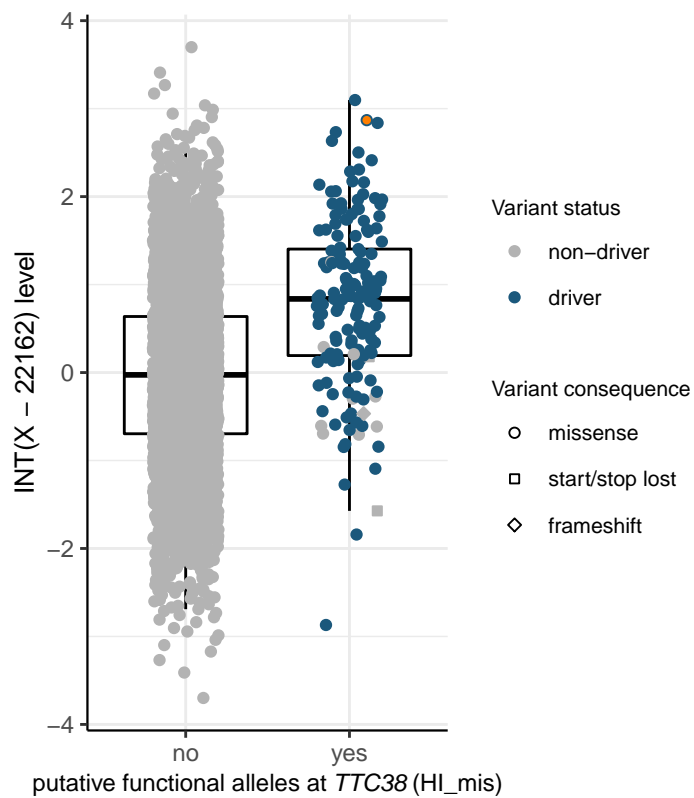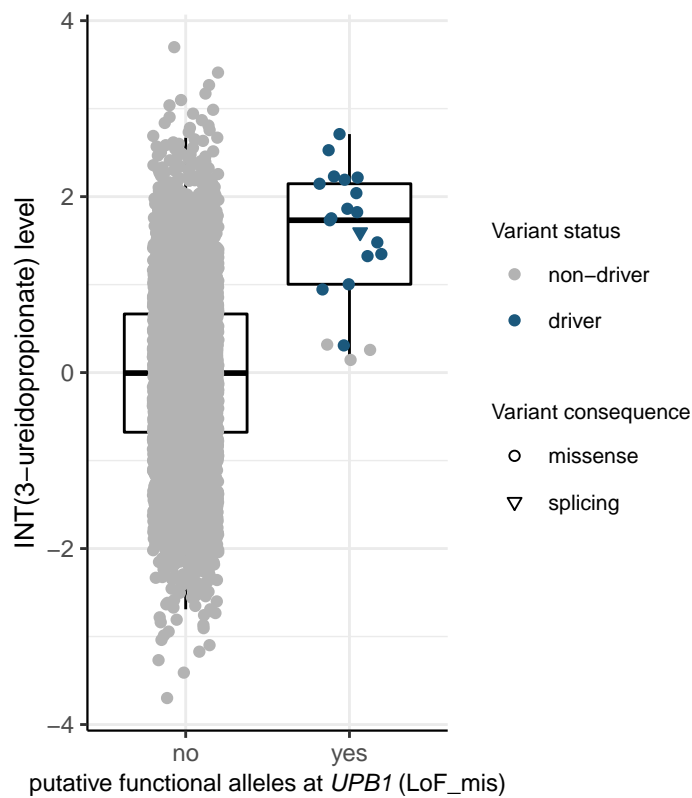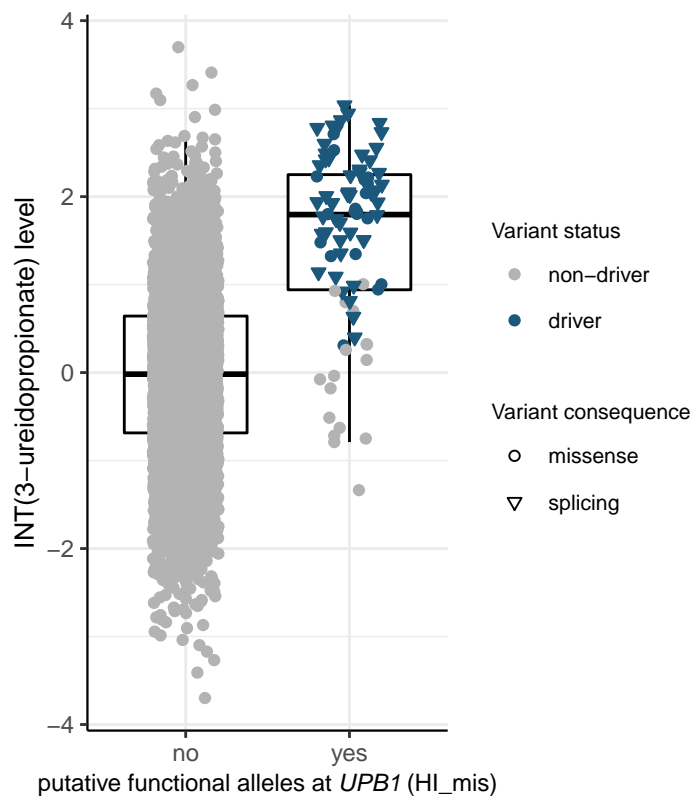

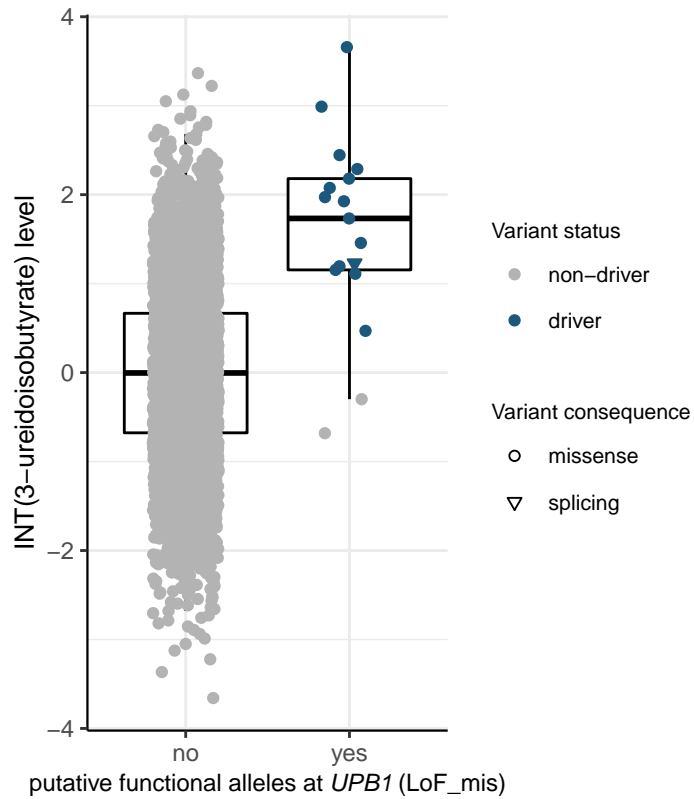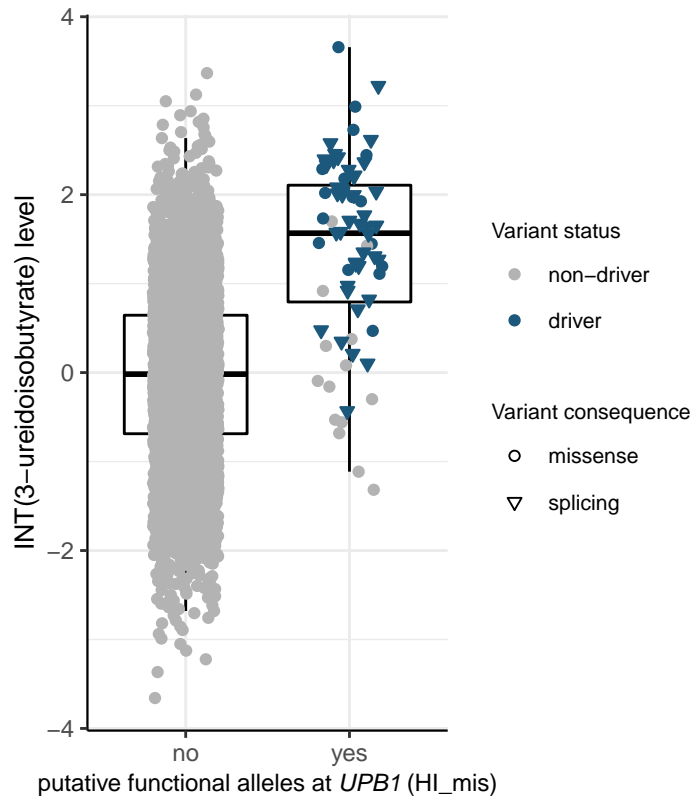

Supplement: Supplementary file [file media-4.pdf]
